# Supplementary material for: Comparative analysis of the efficacies of probiotic supplementation and glucose-lowering drugs for the treatment of type 2 diabetes: A systematic review and meta-analysis
Source: PubMed Central journal article supplement (PMC9339904; doi:10.3389/fnut.2022.825897), 2022-07-18

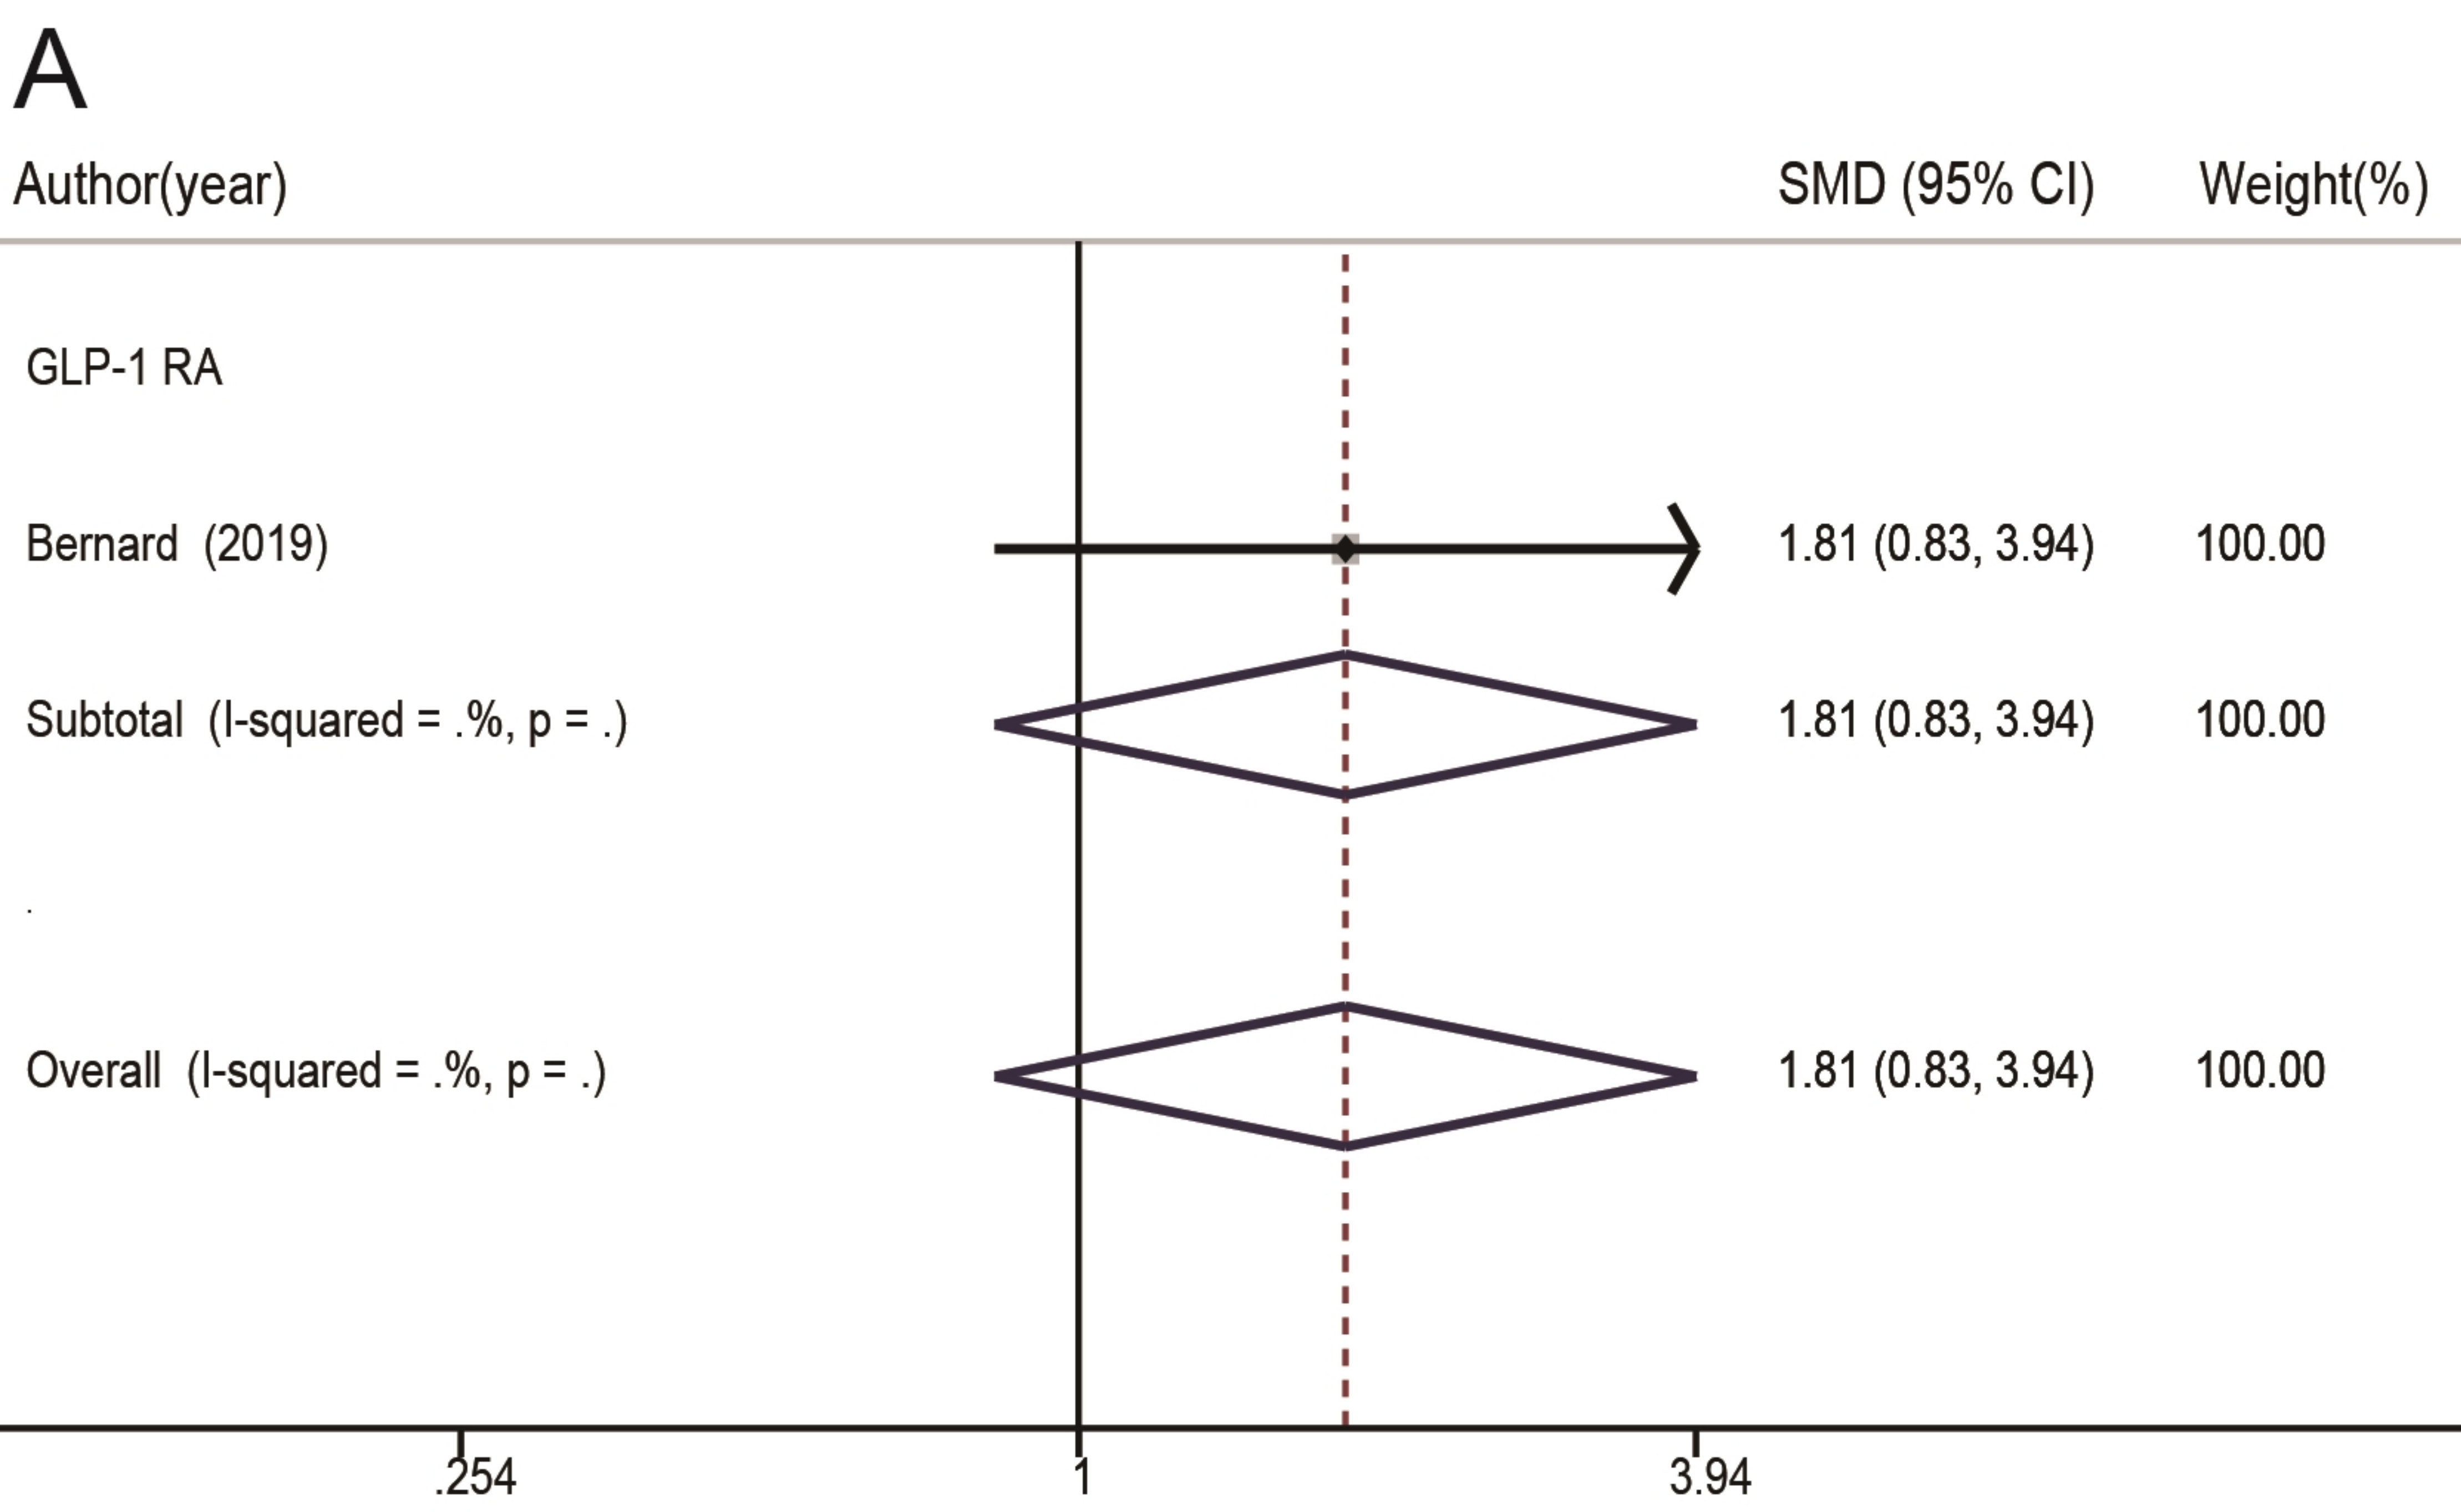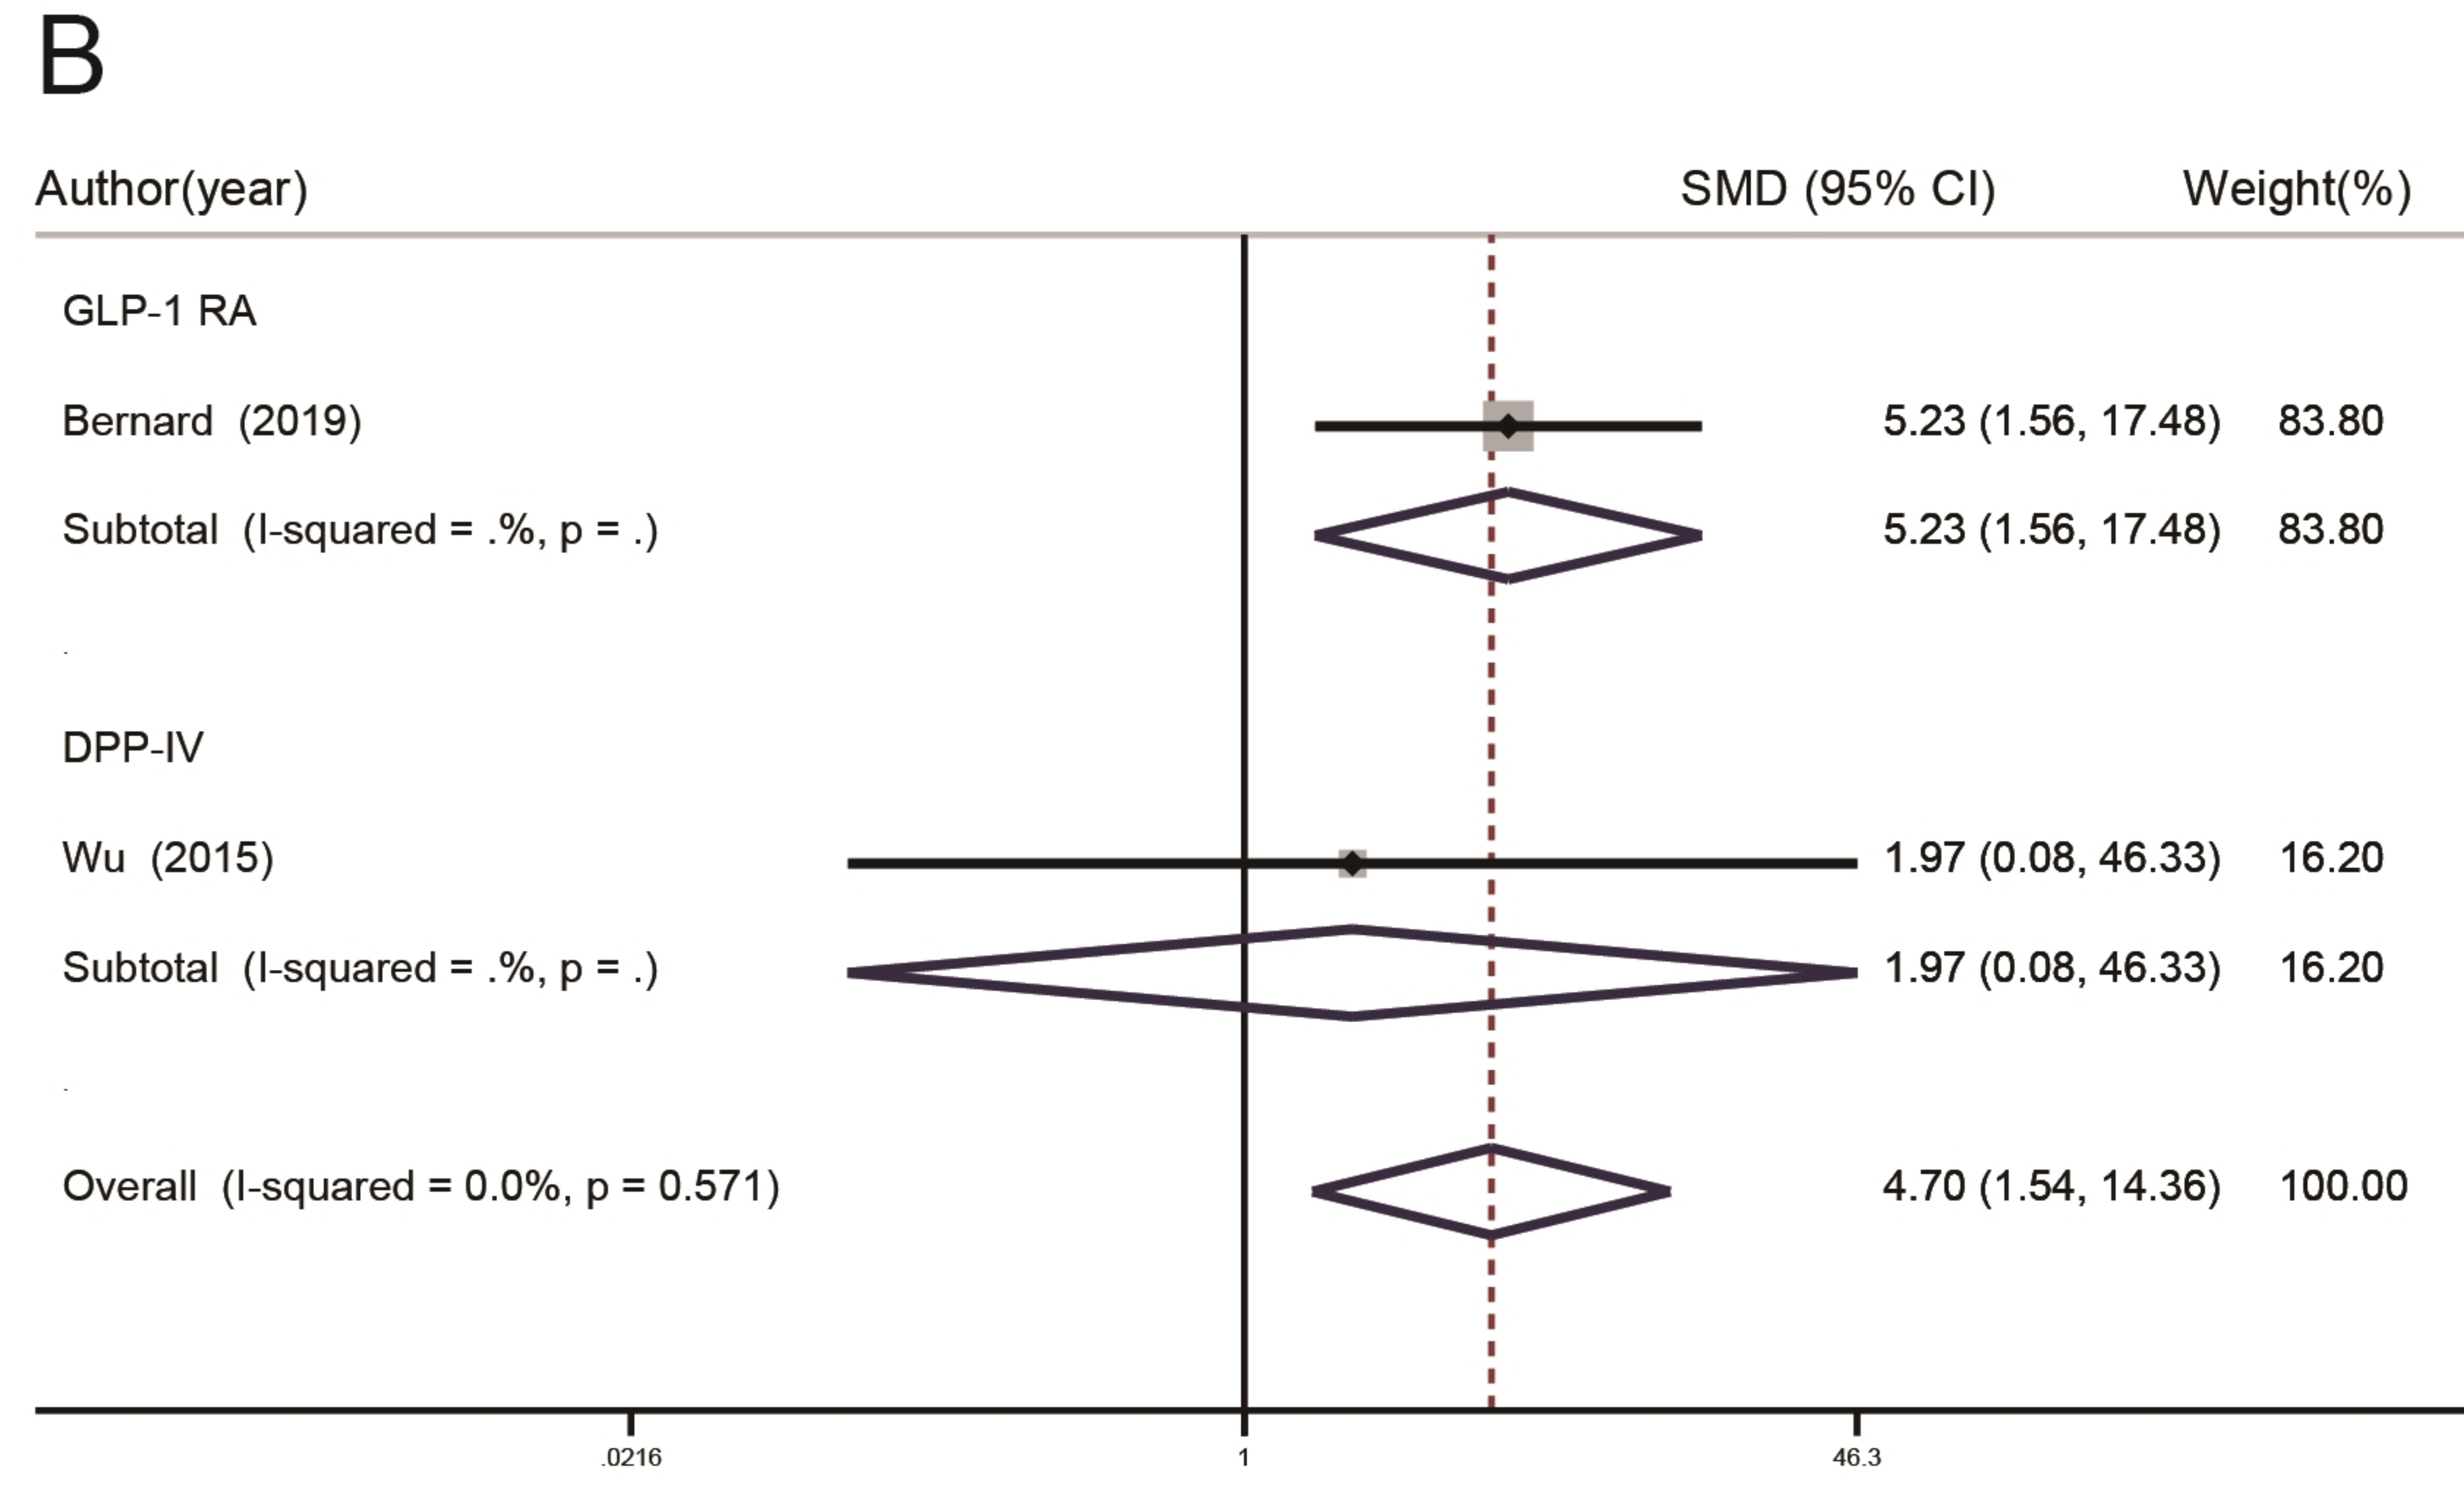

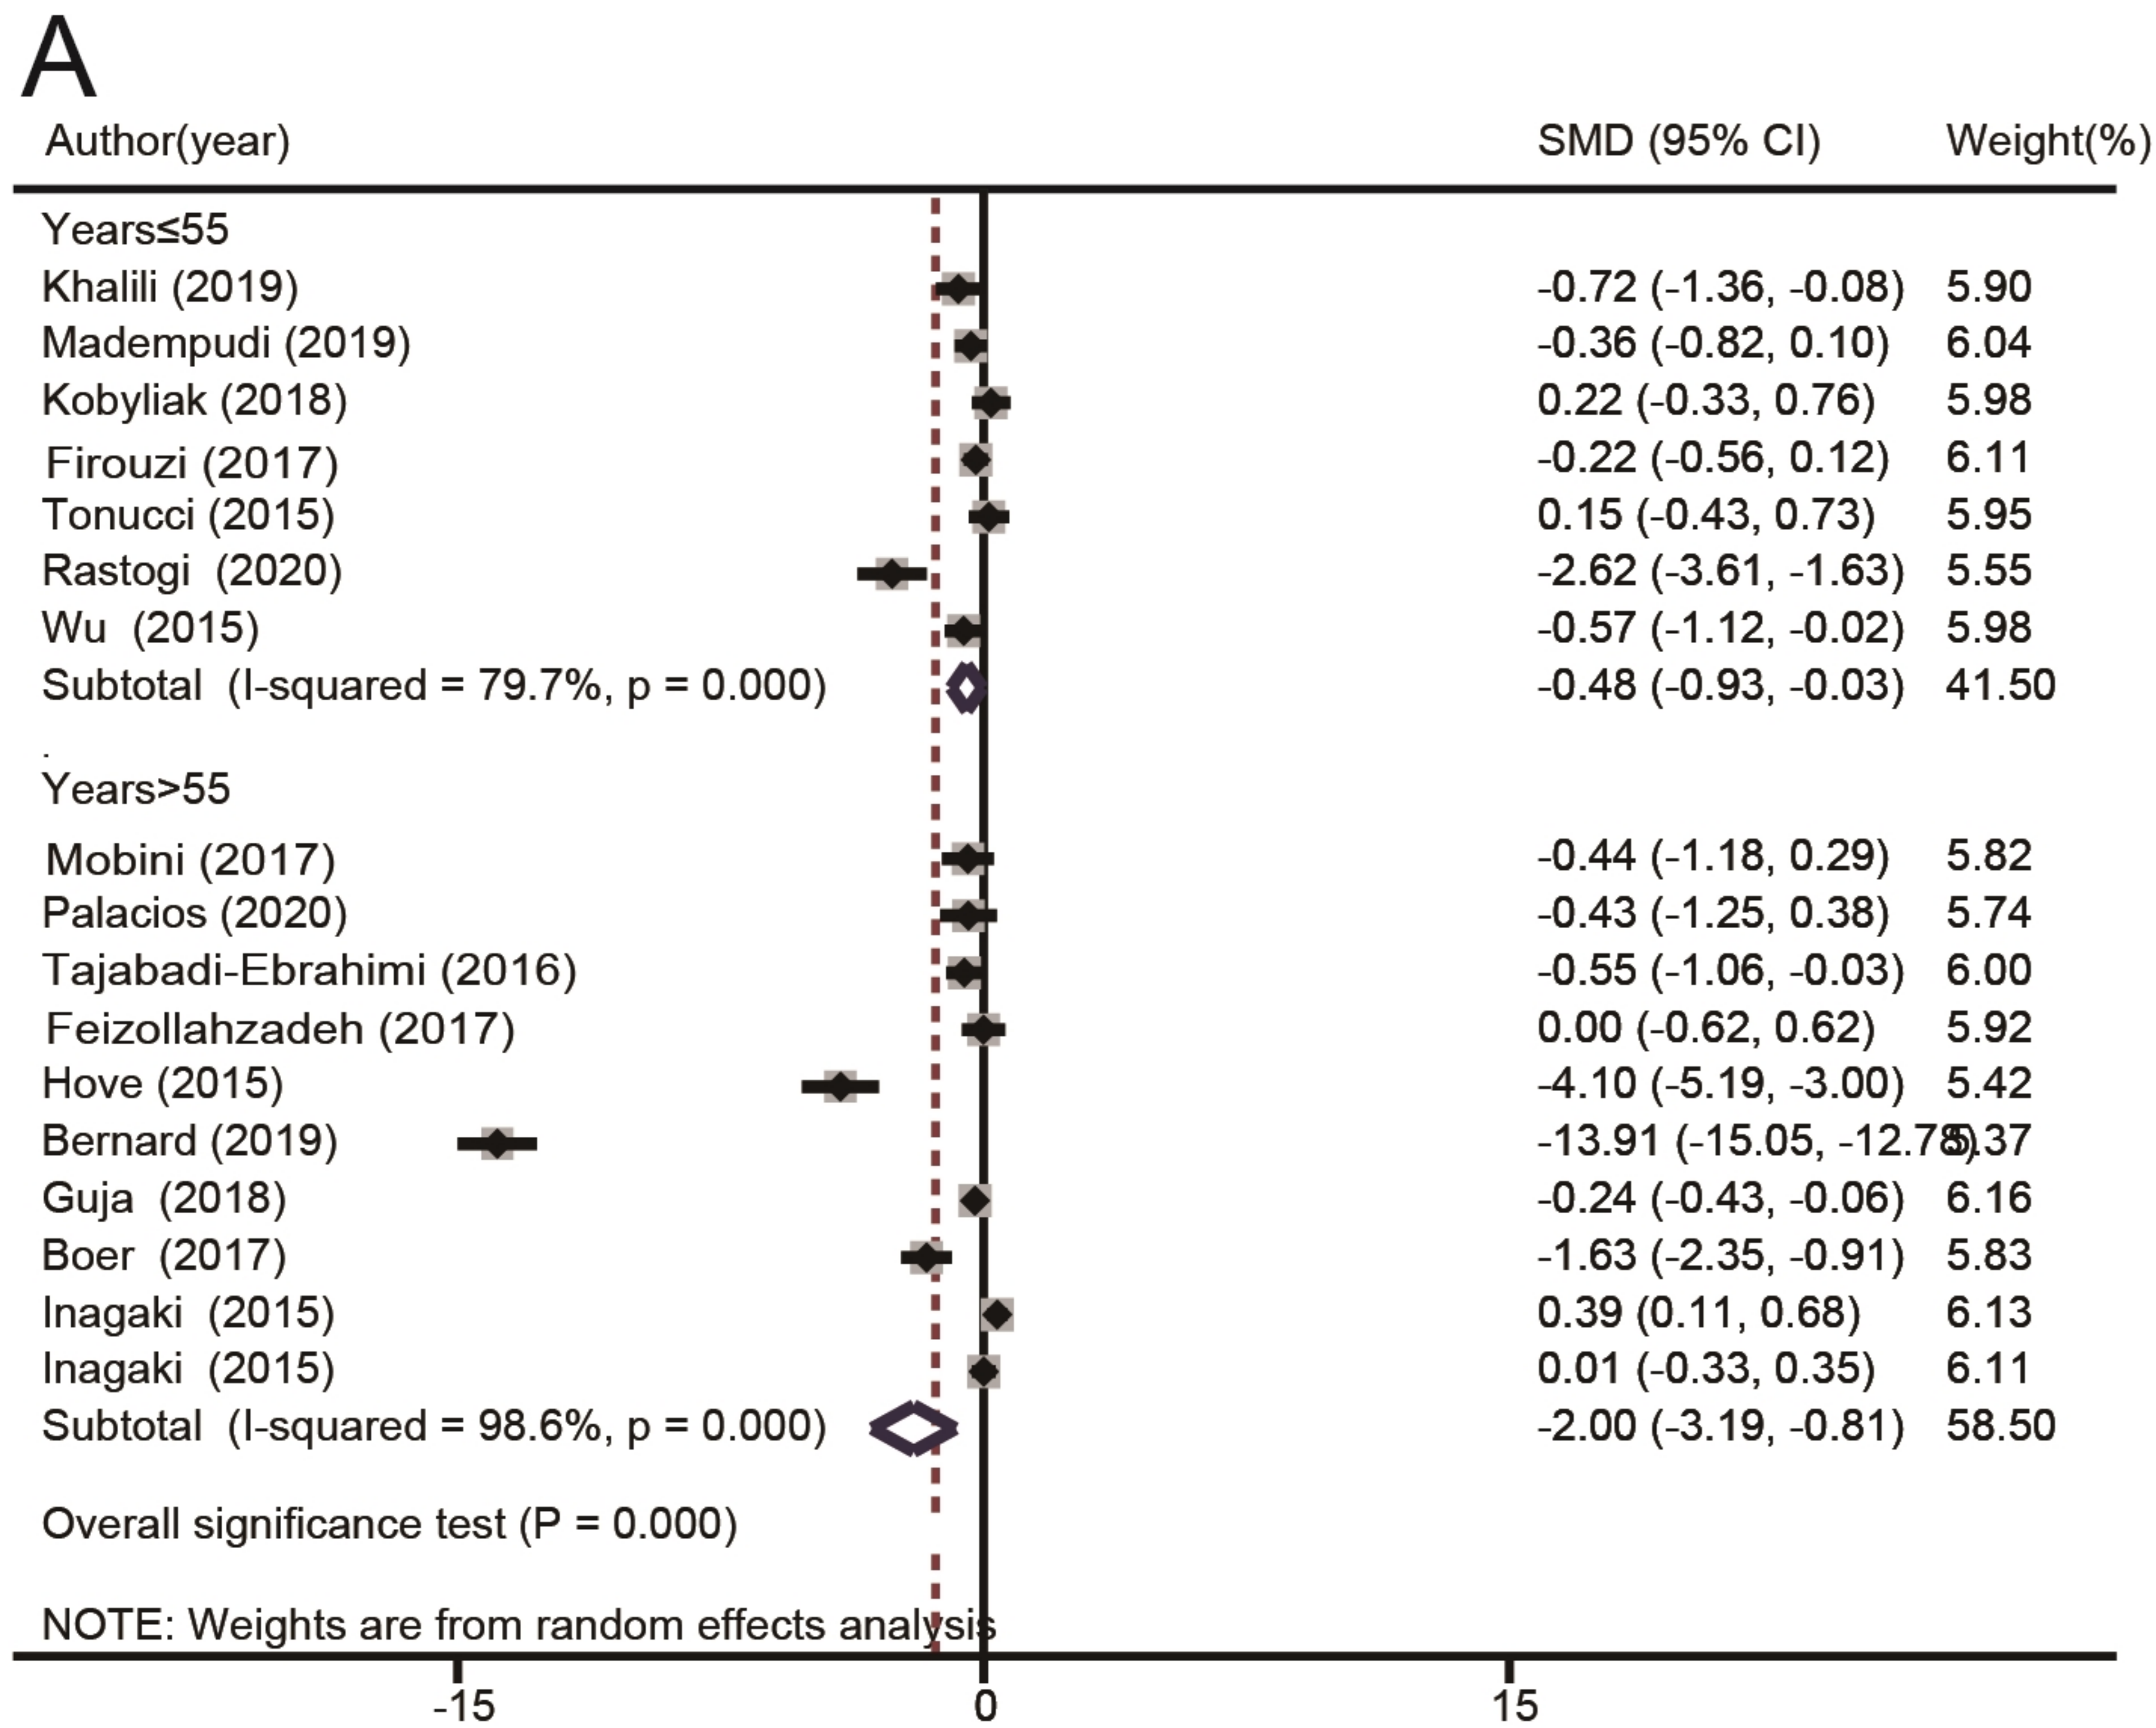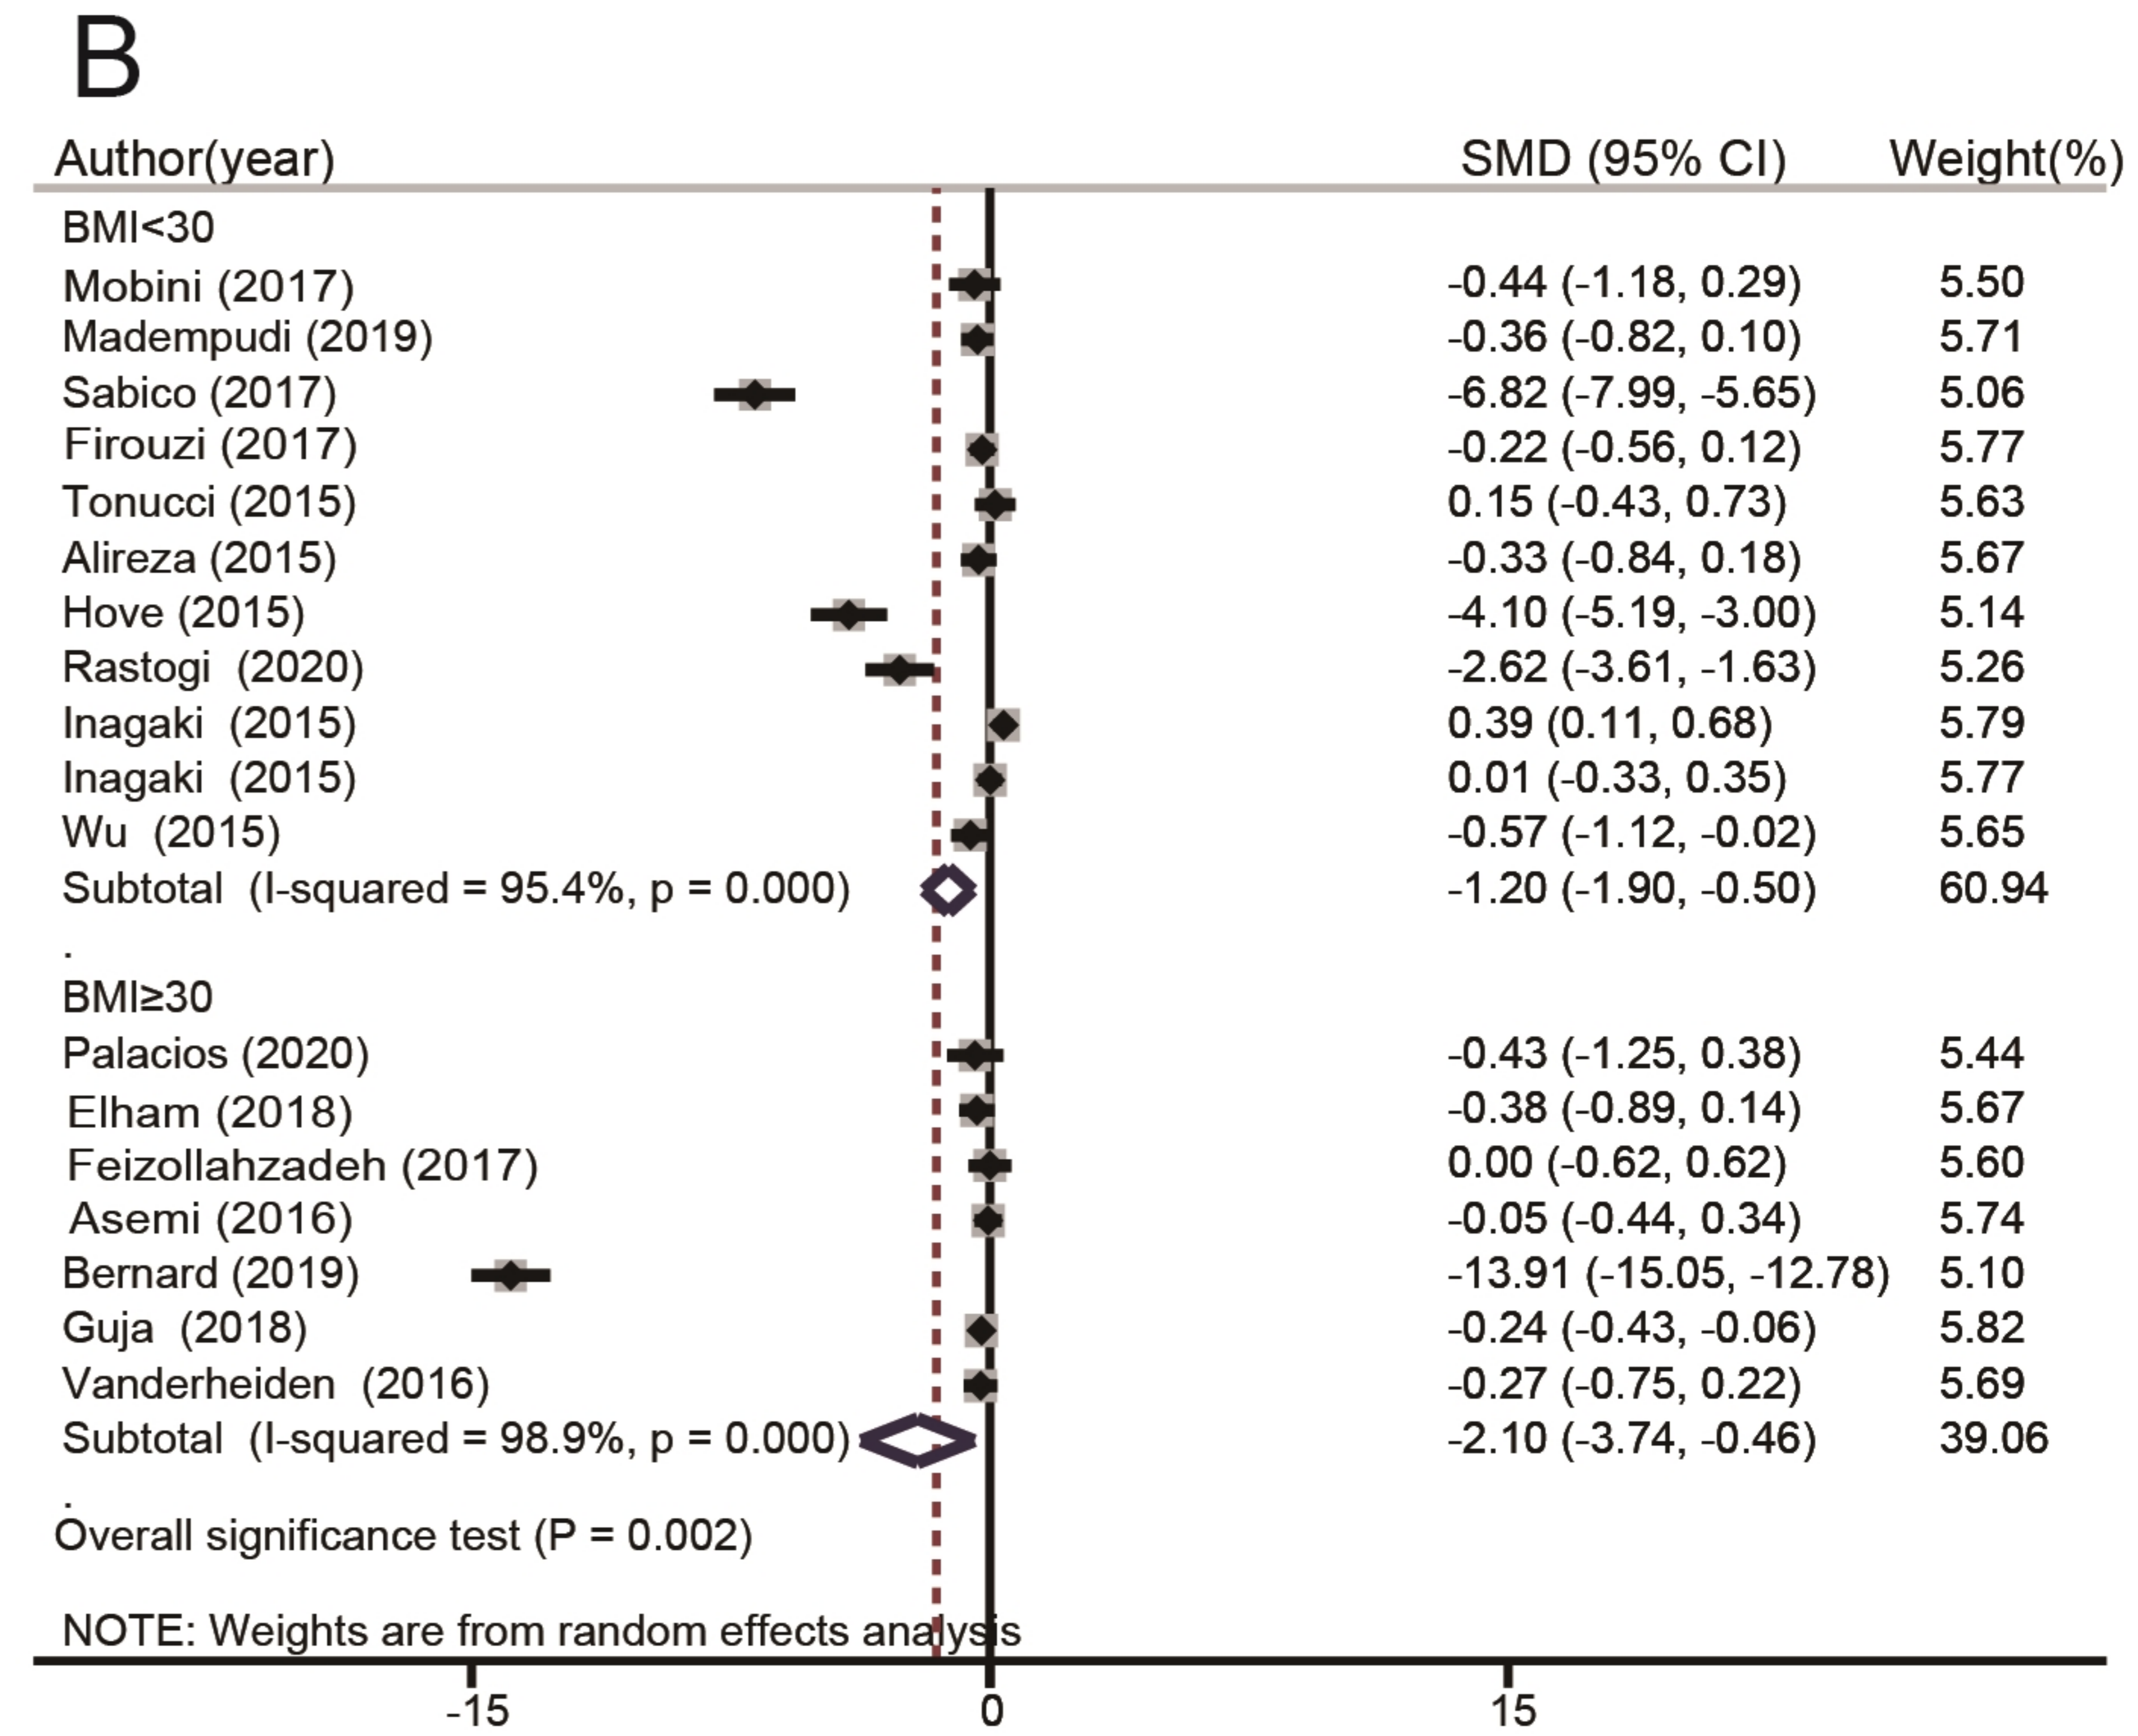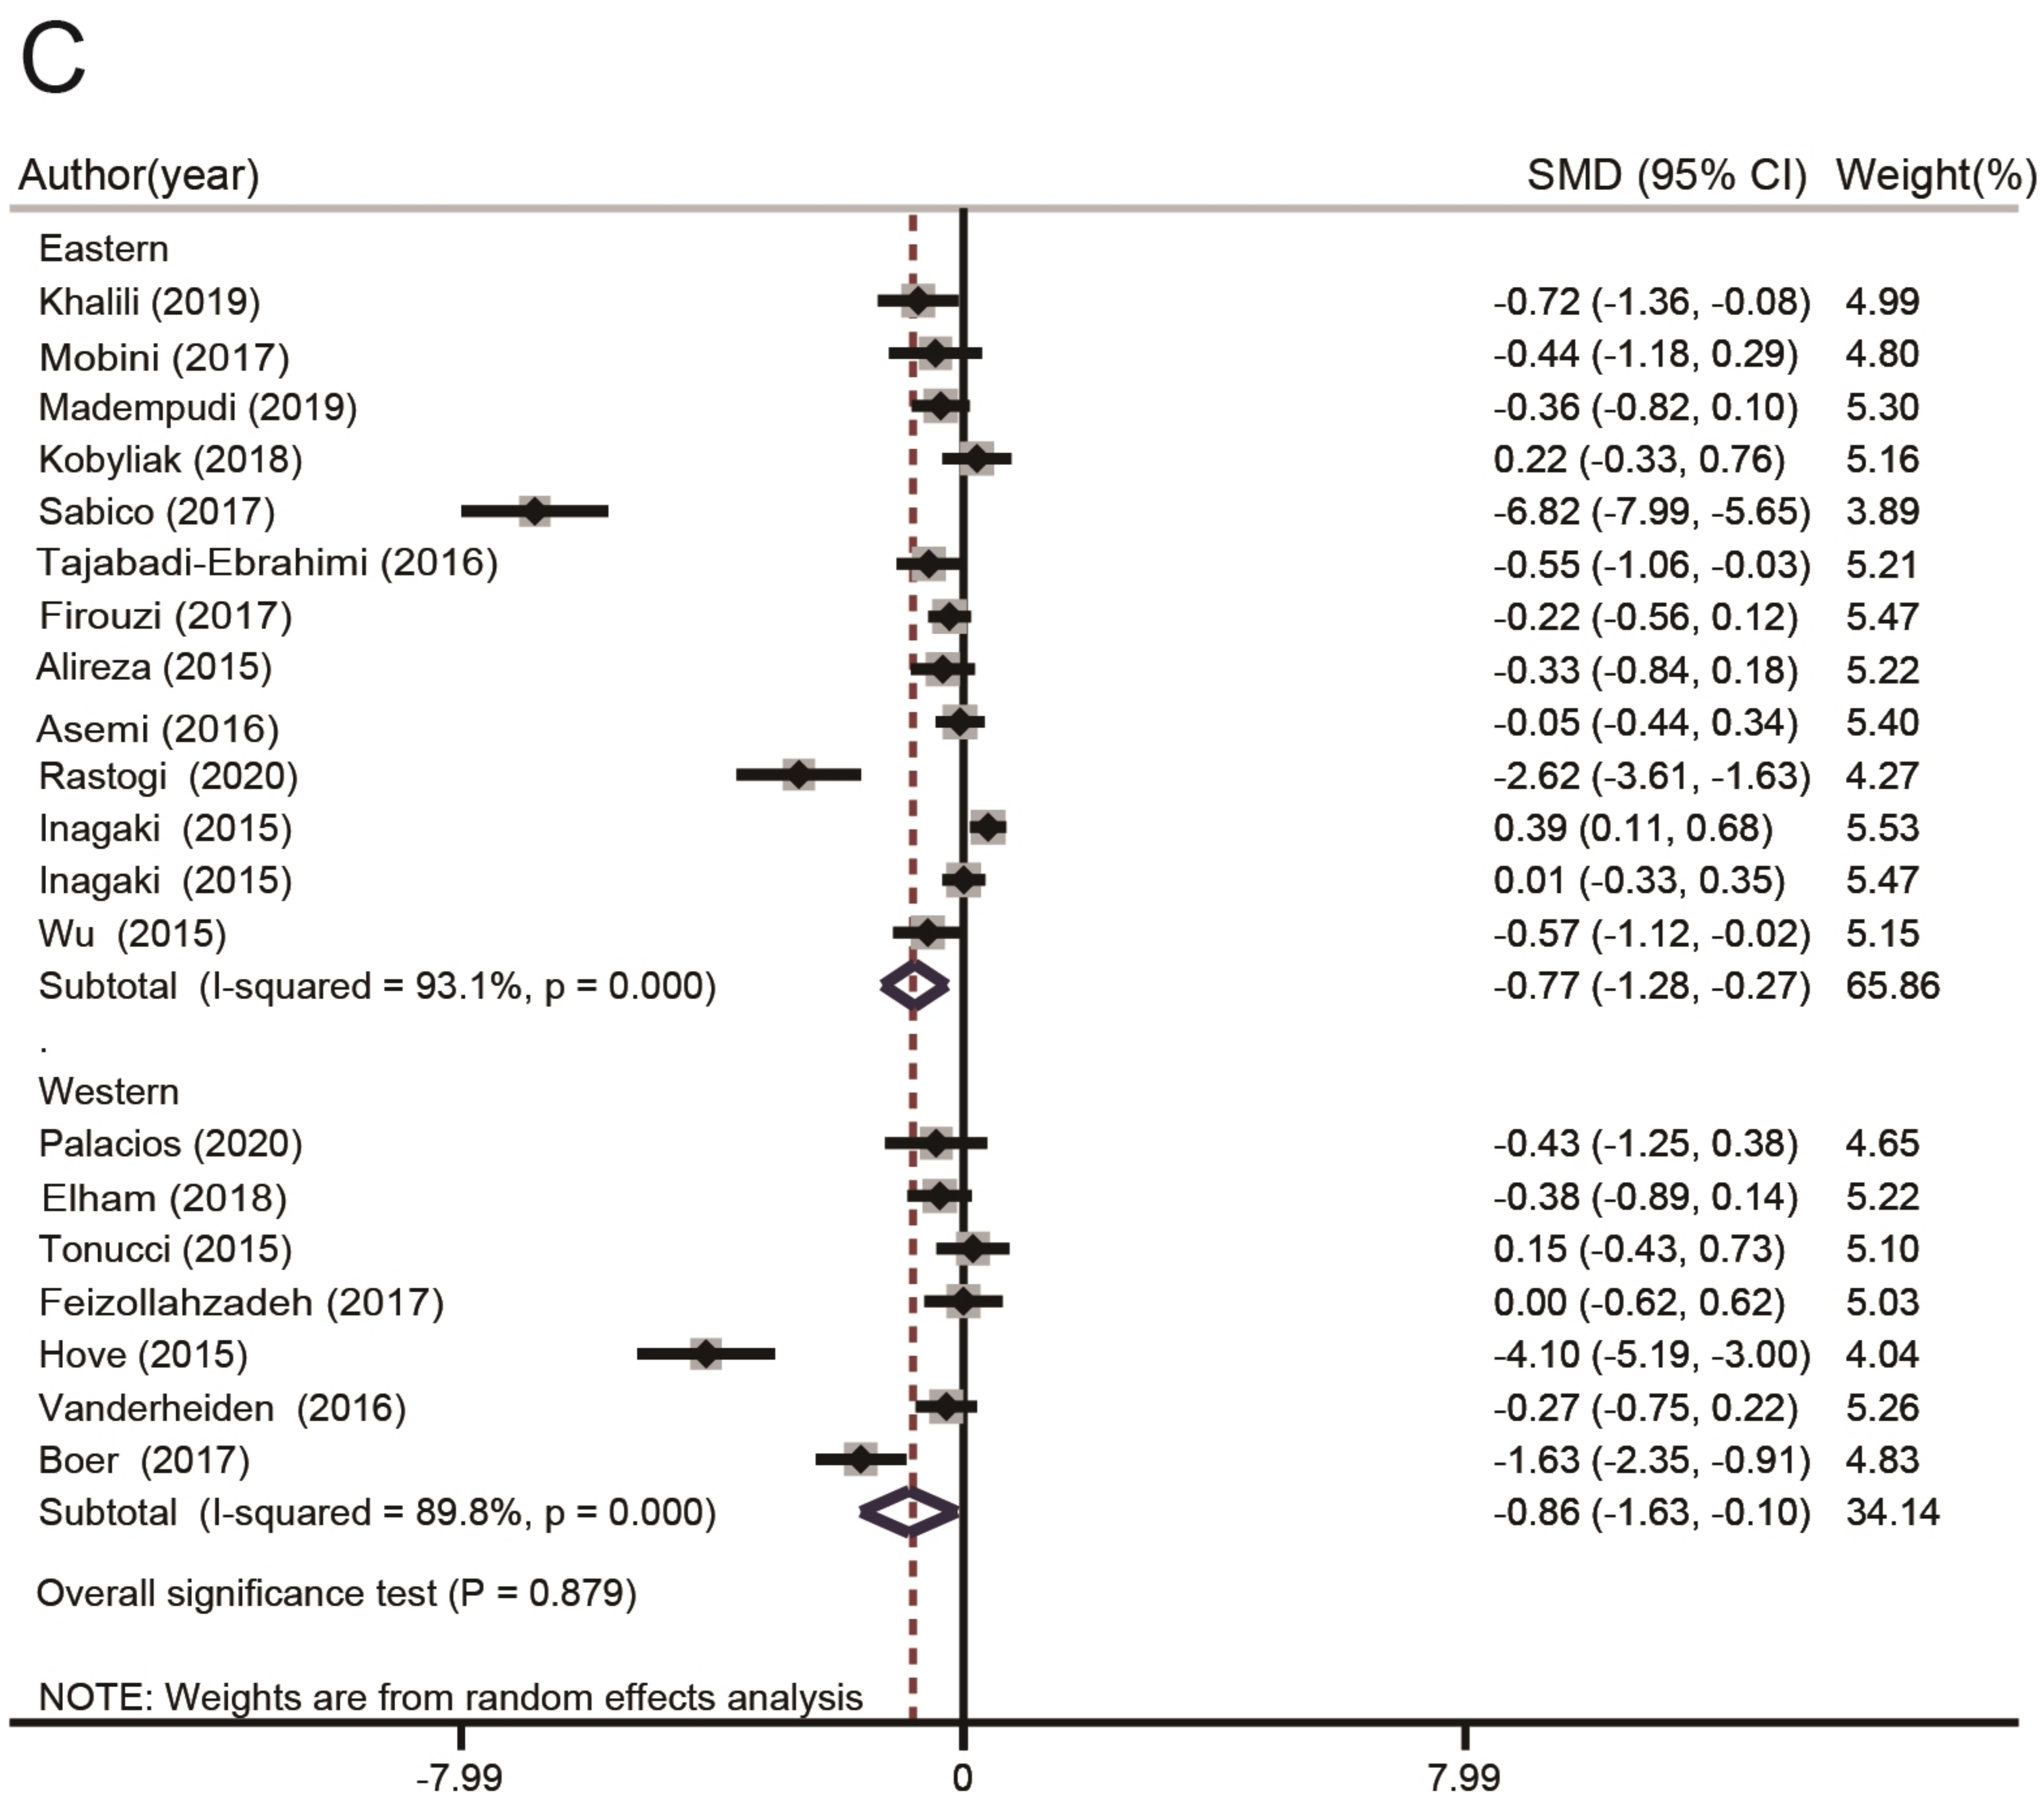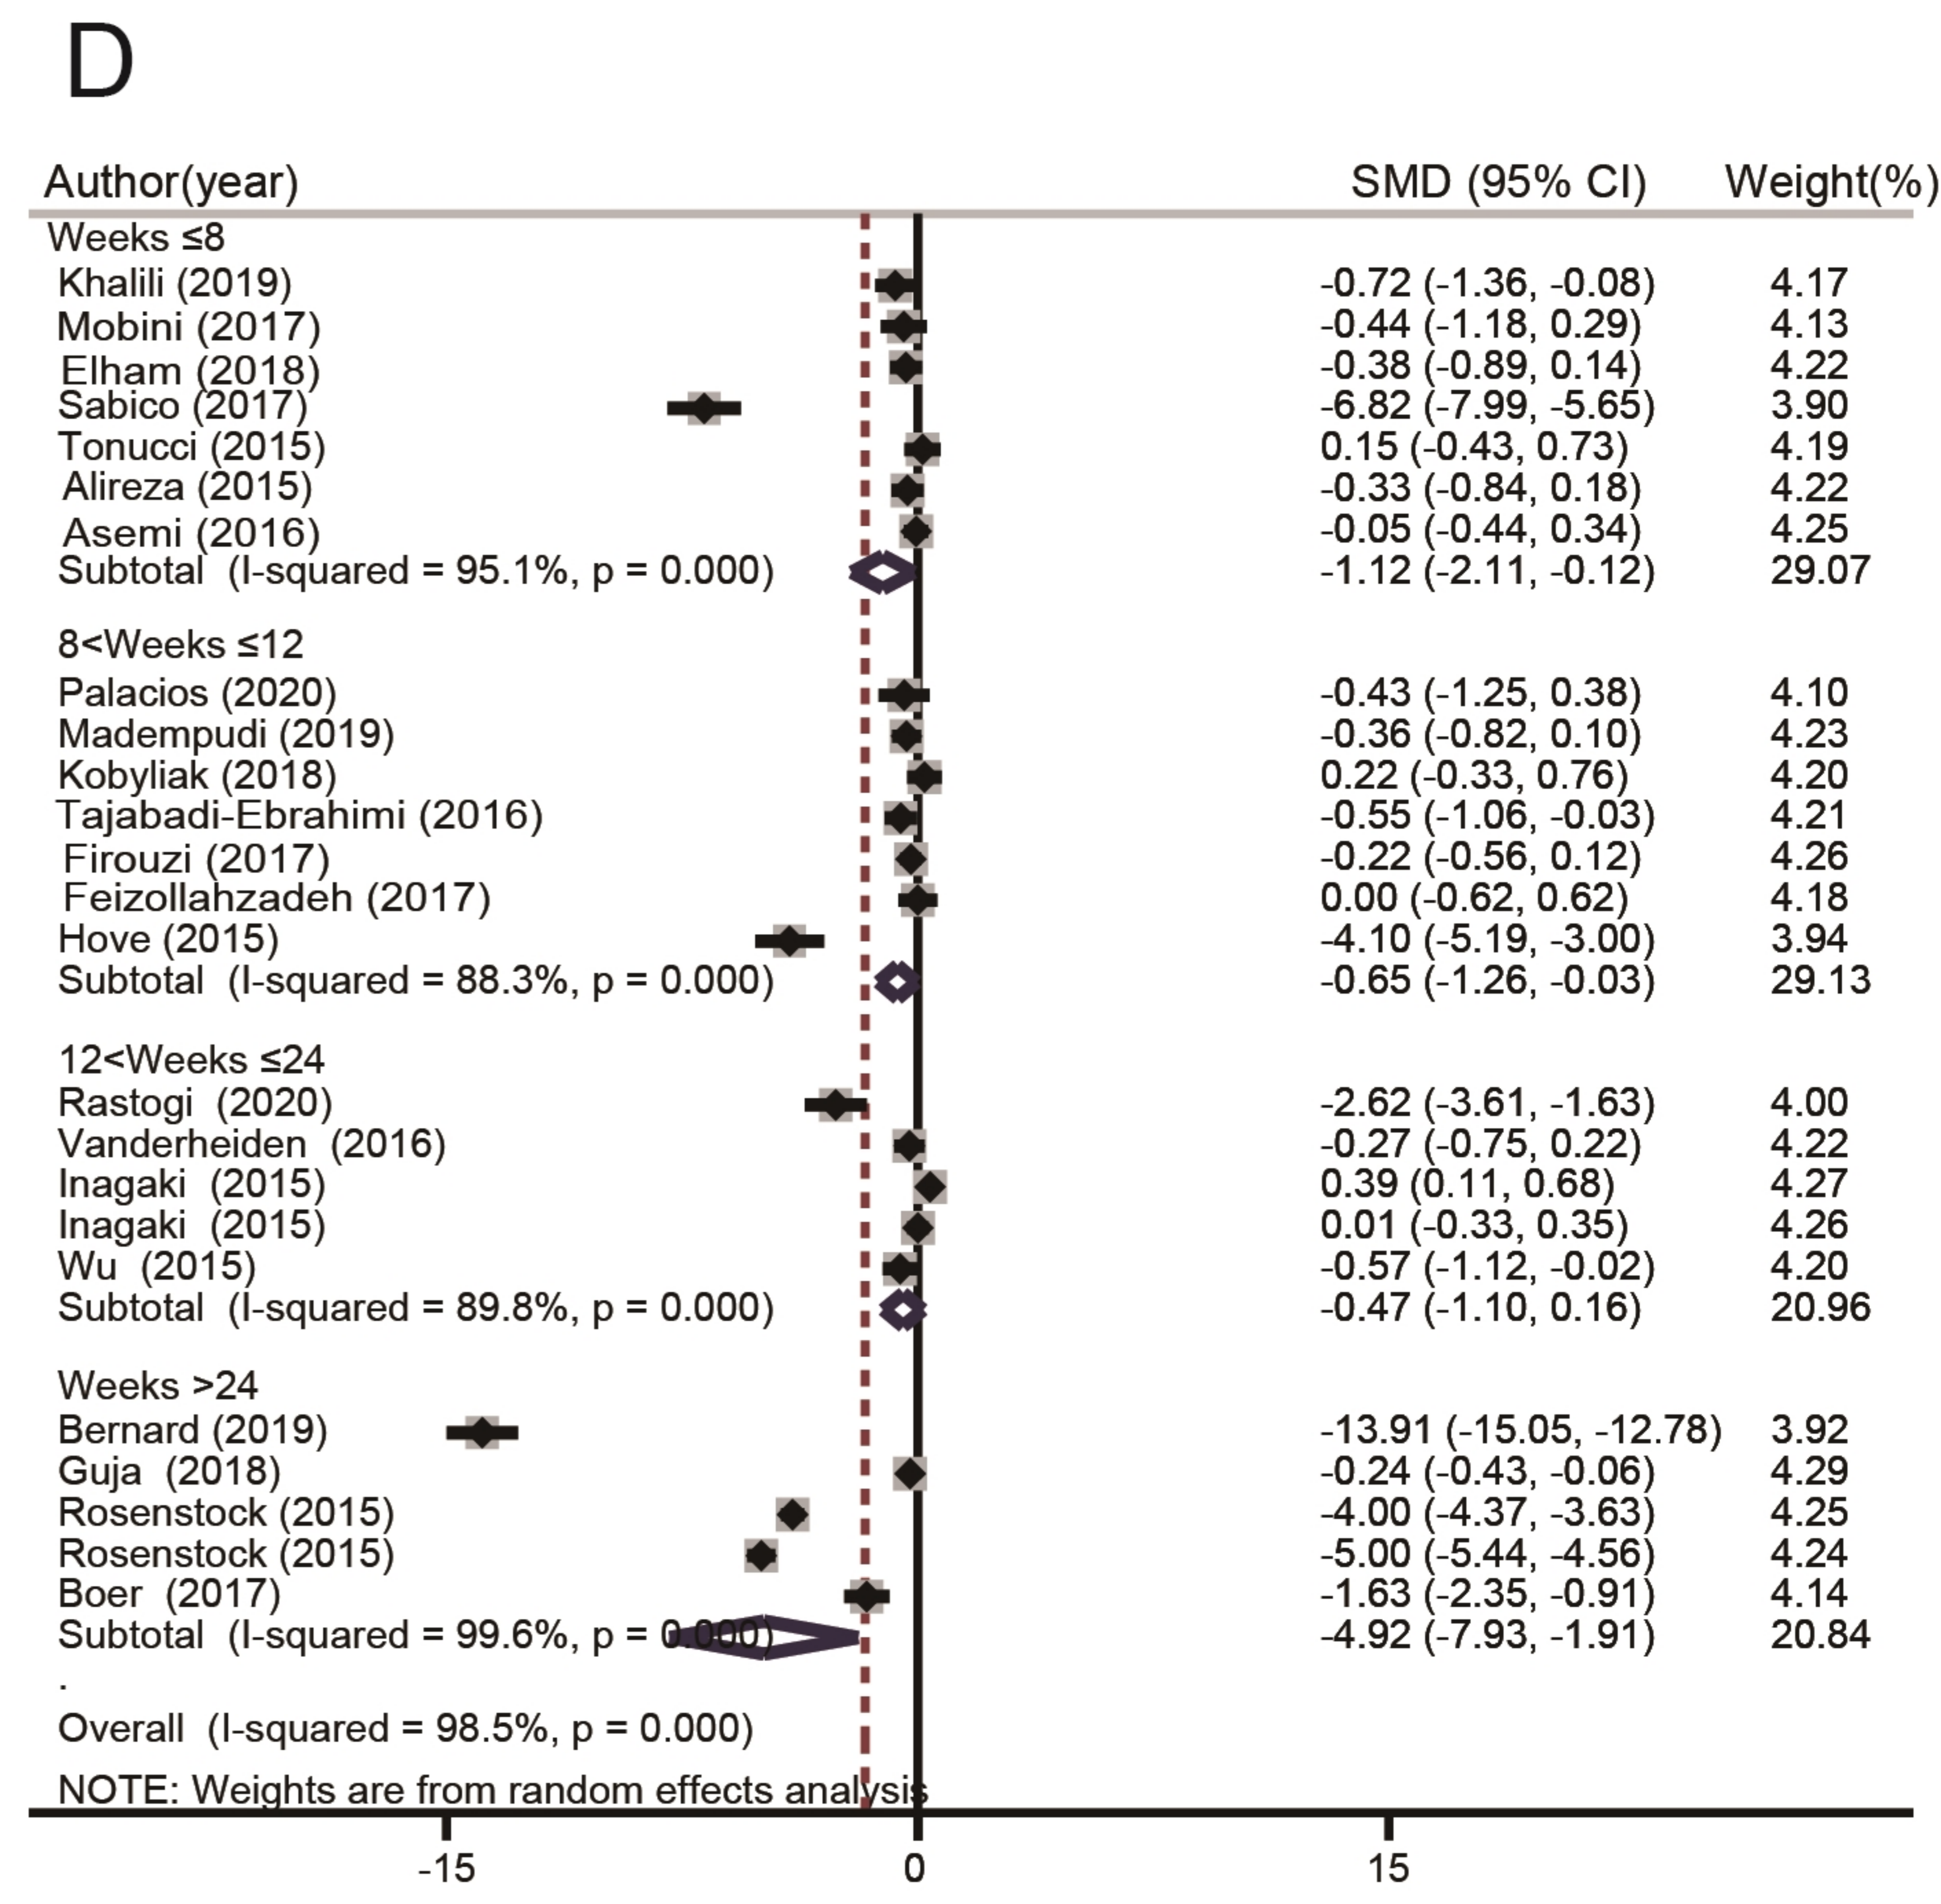

A

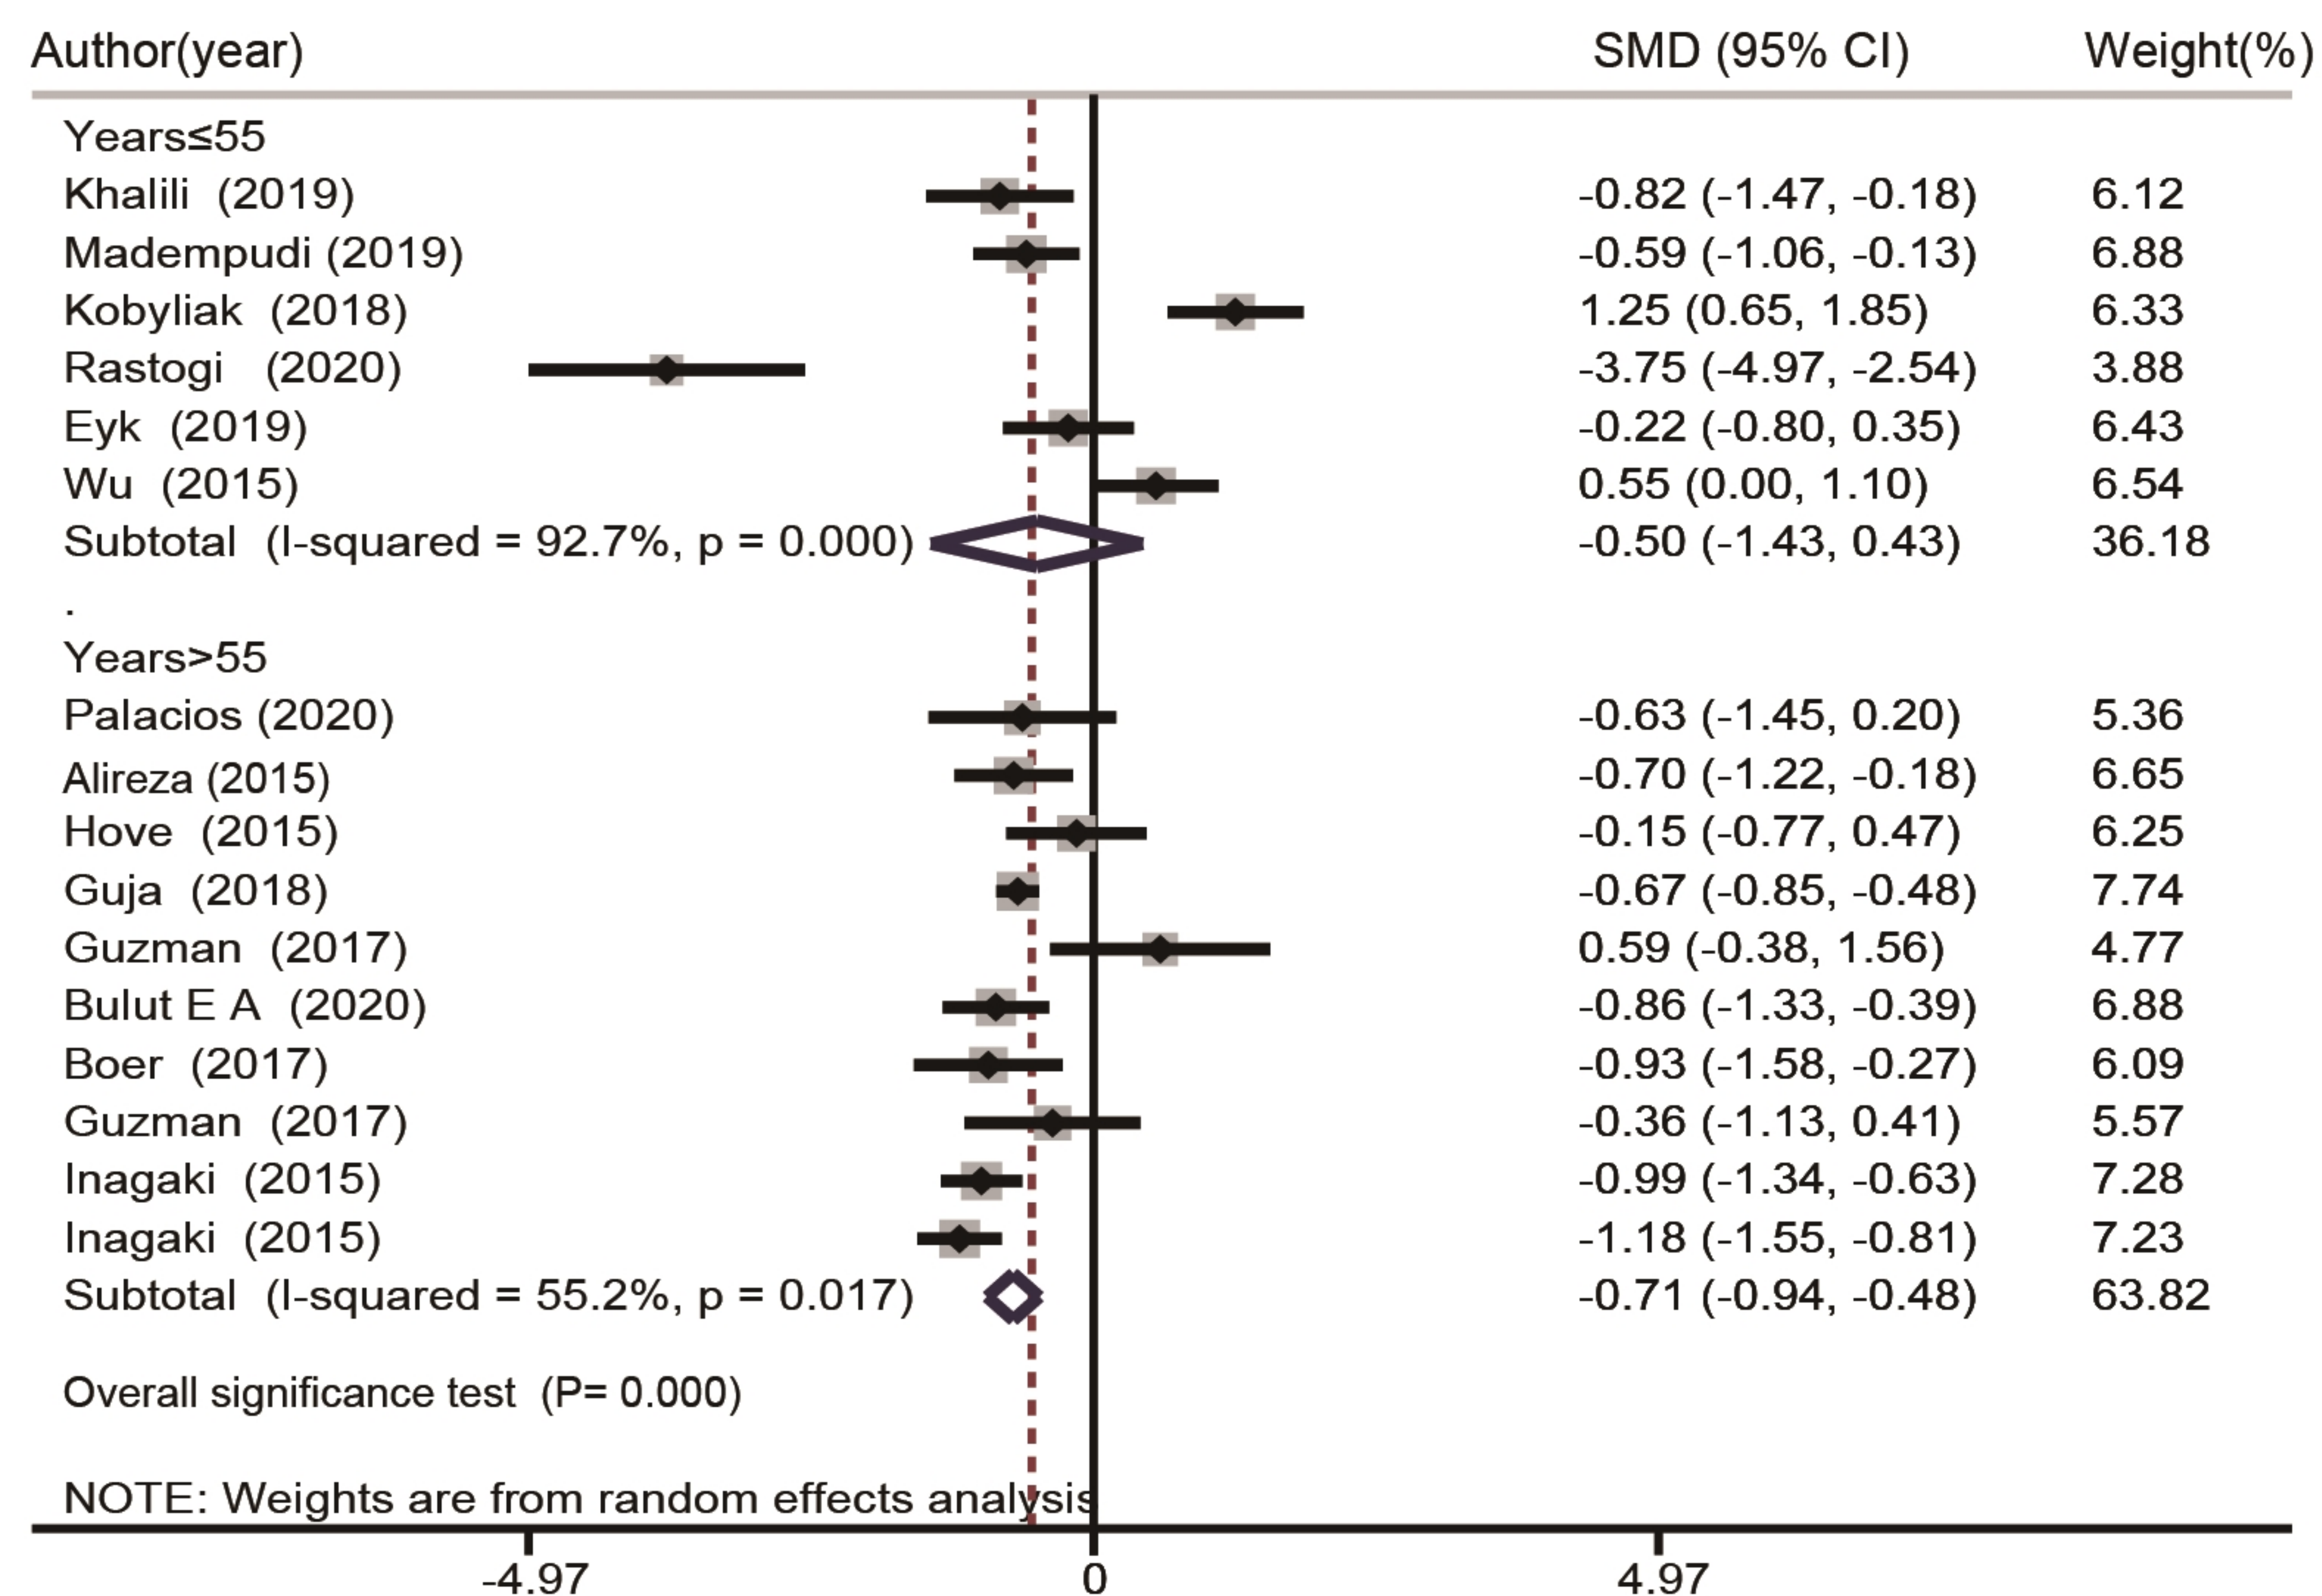

B

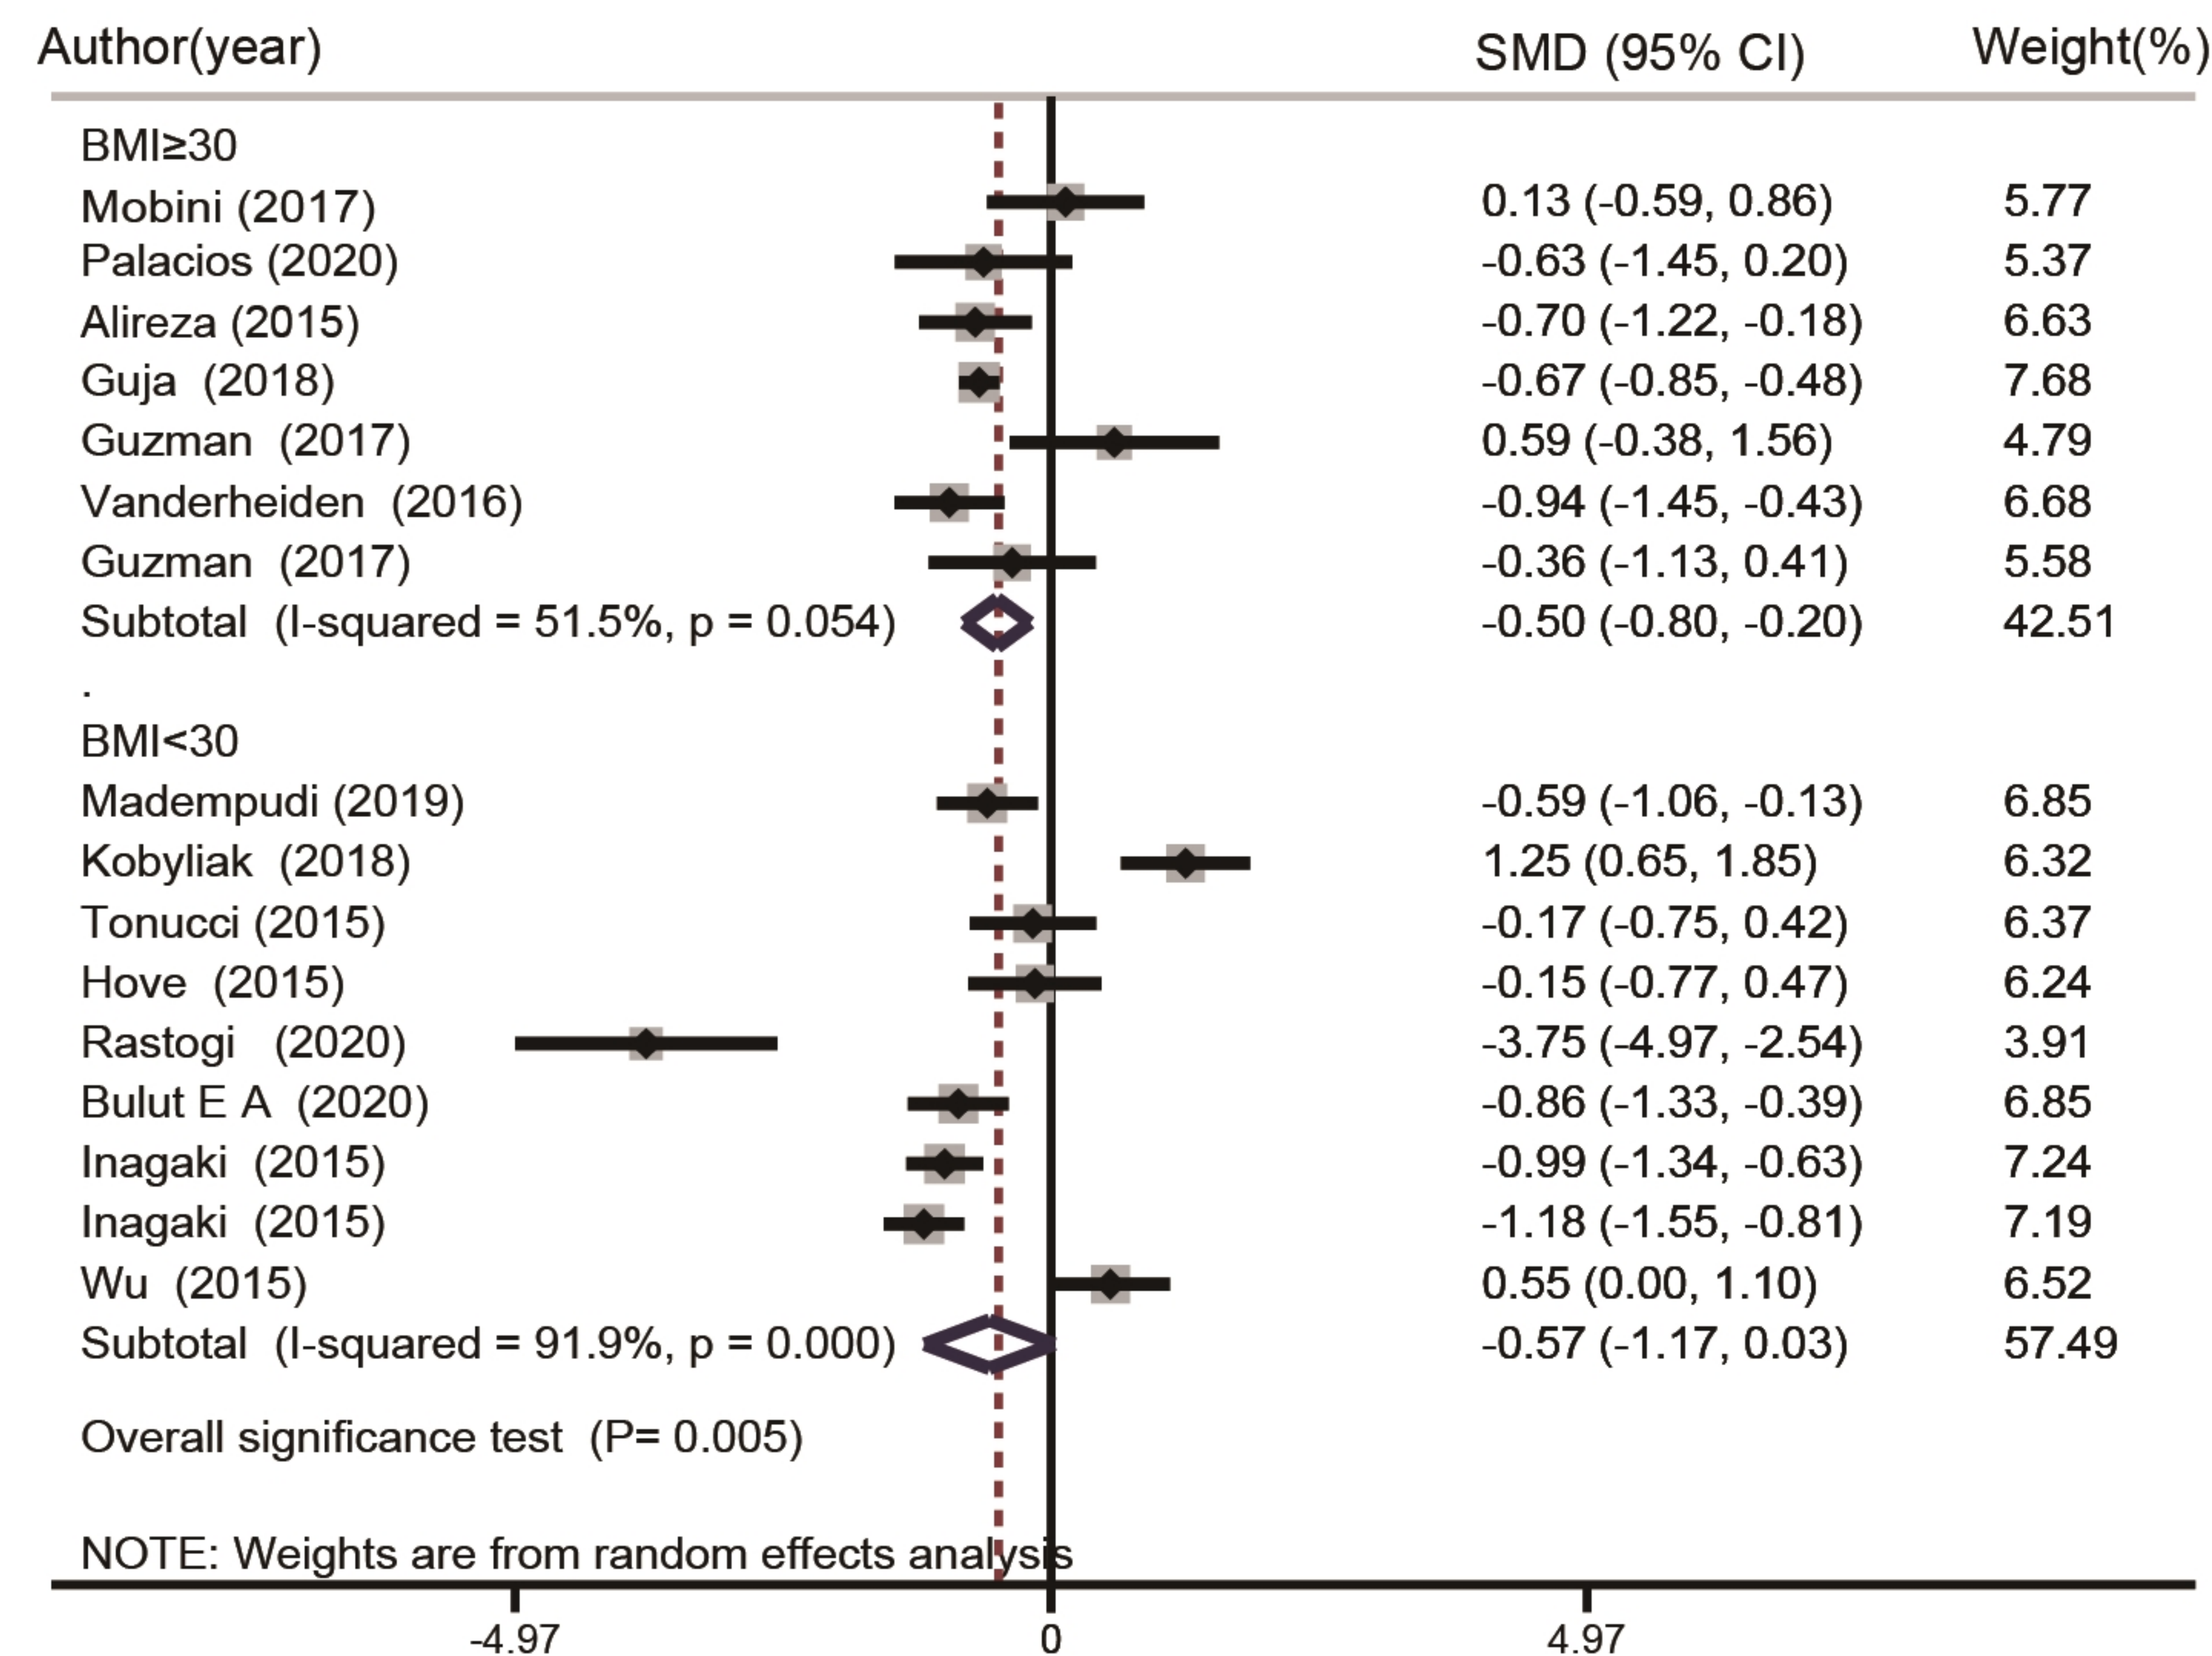

C

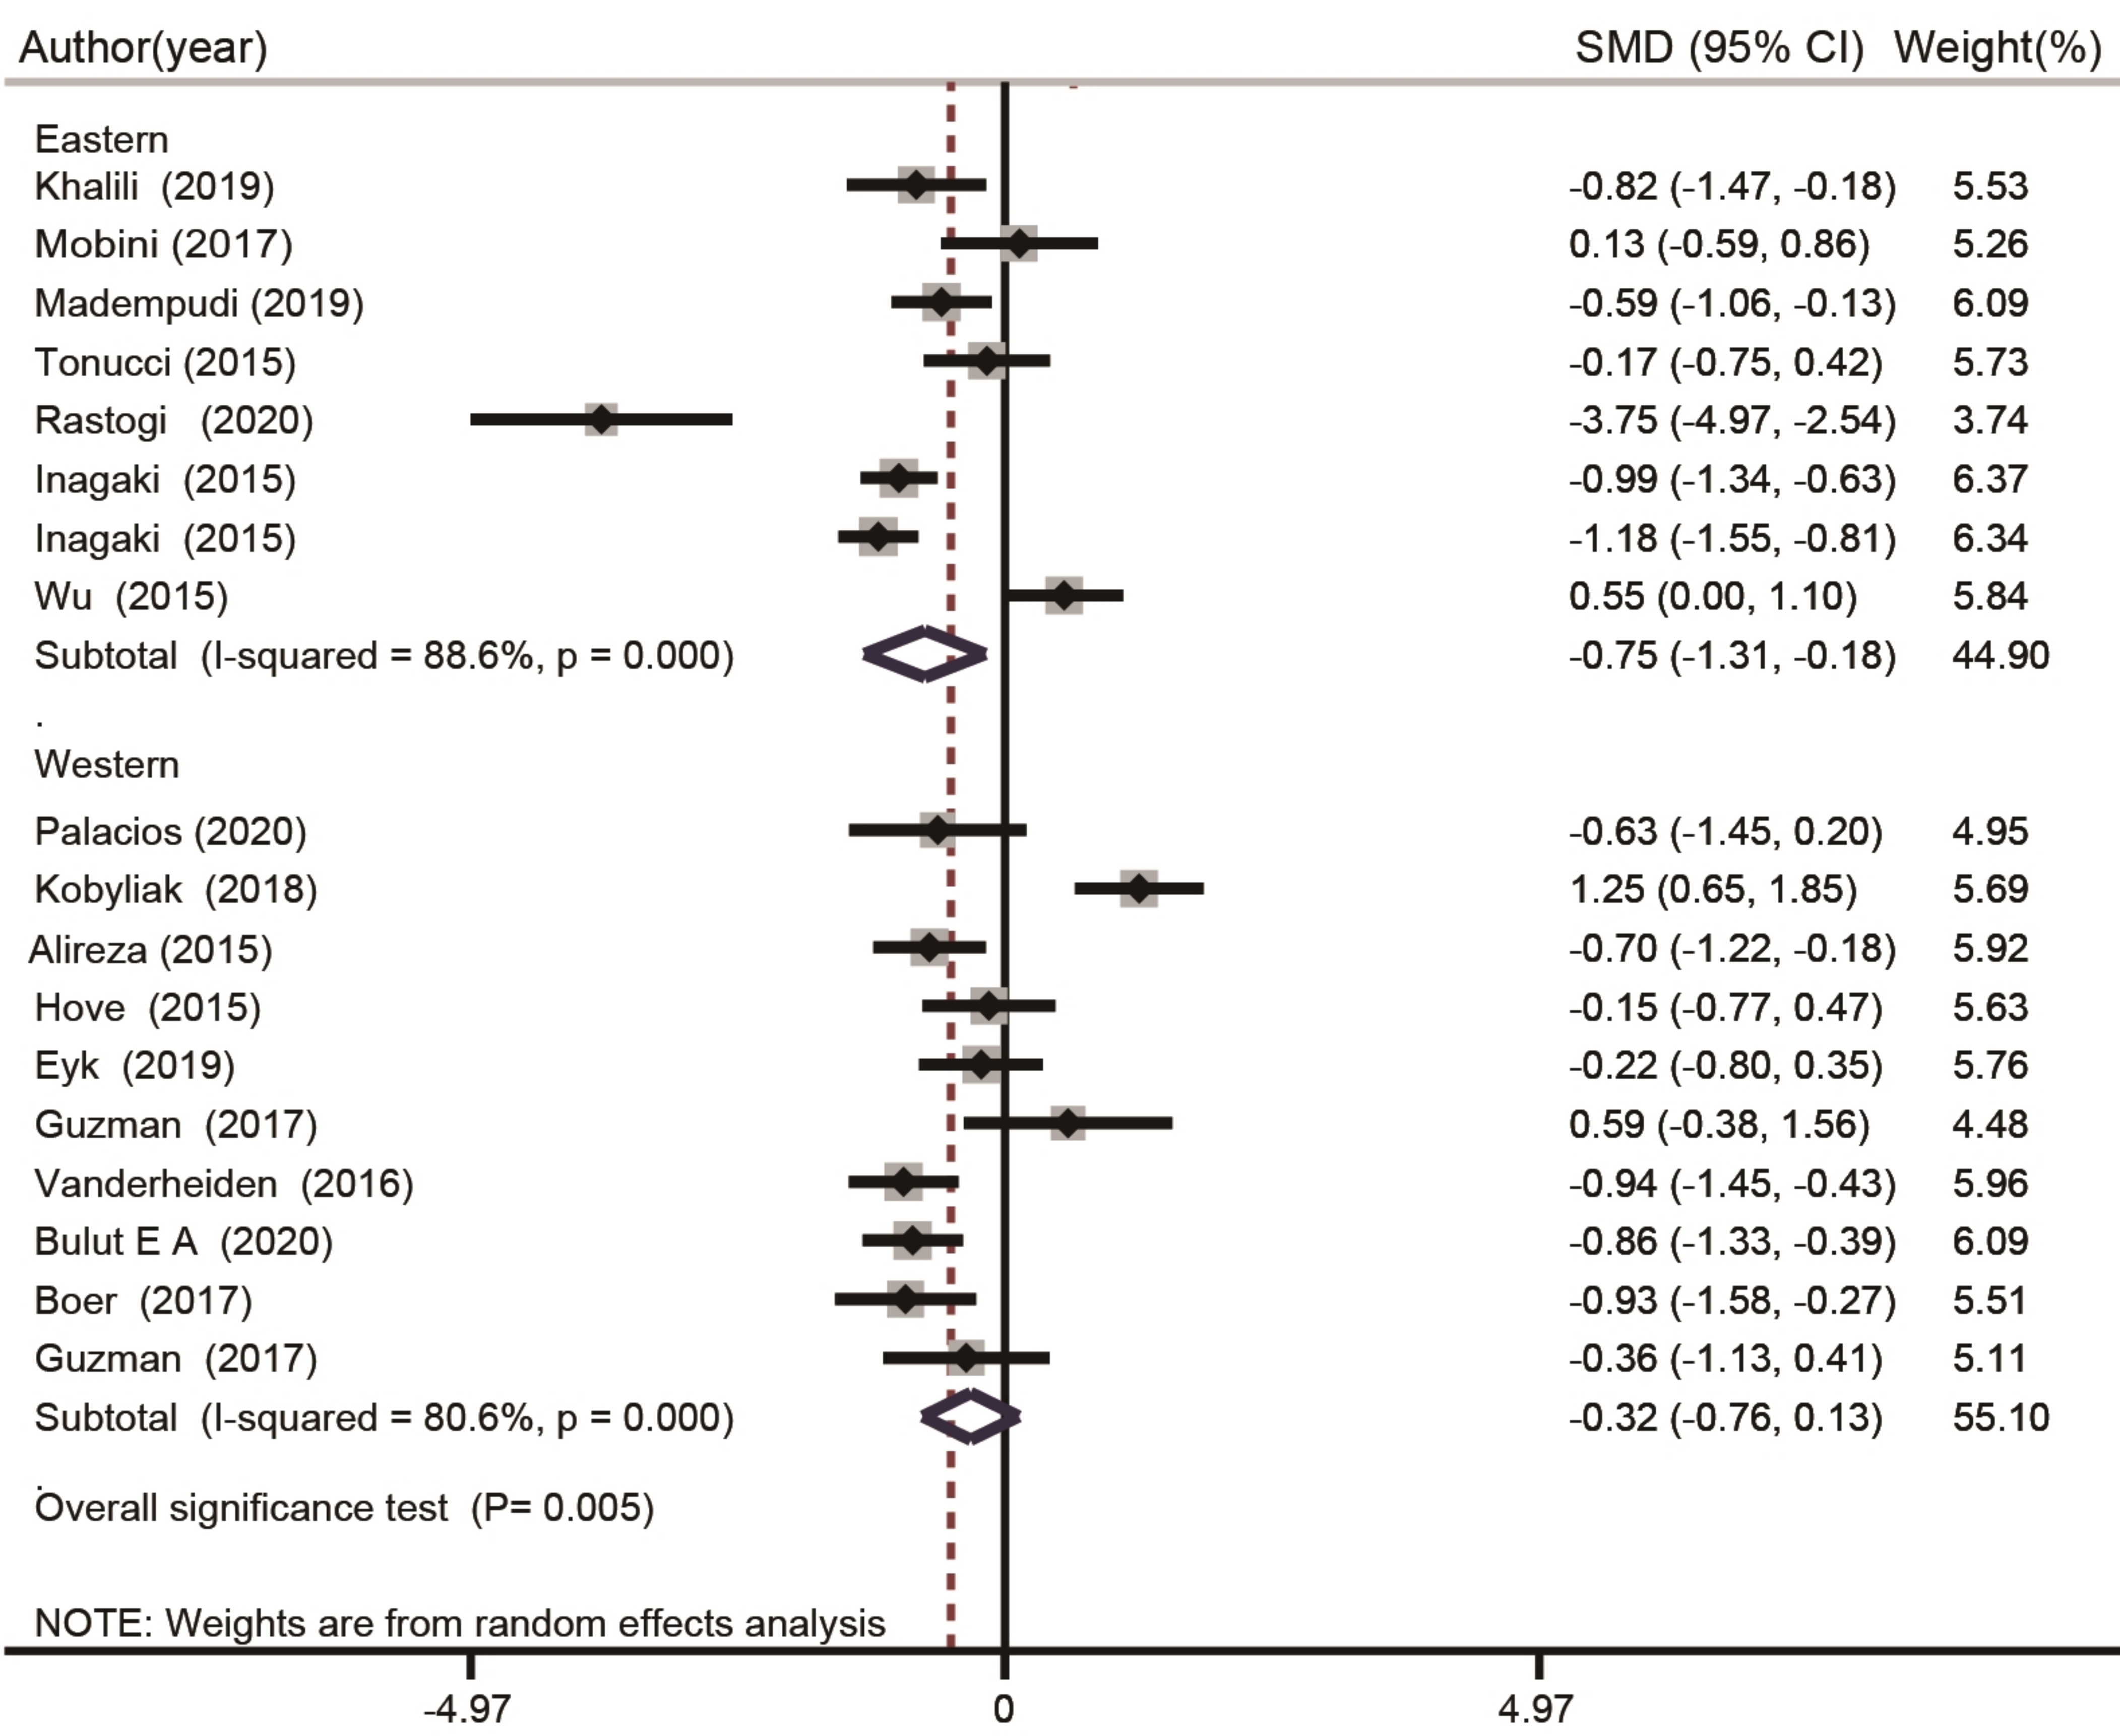

D

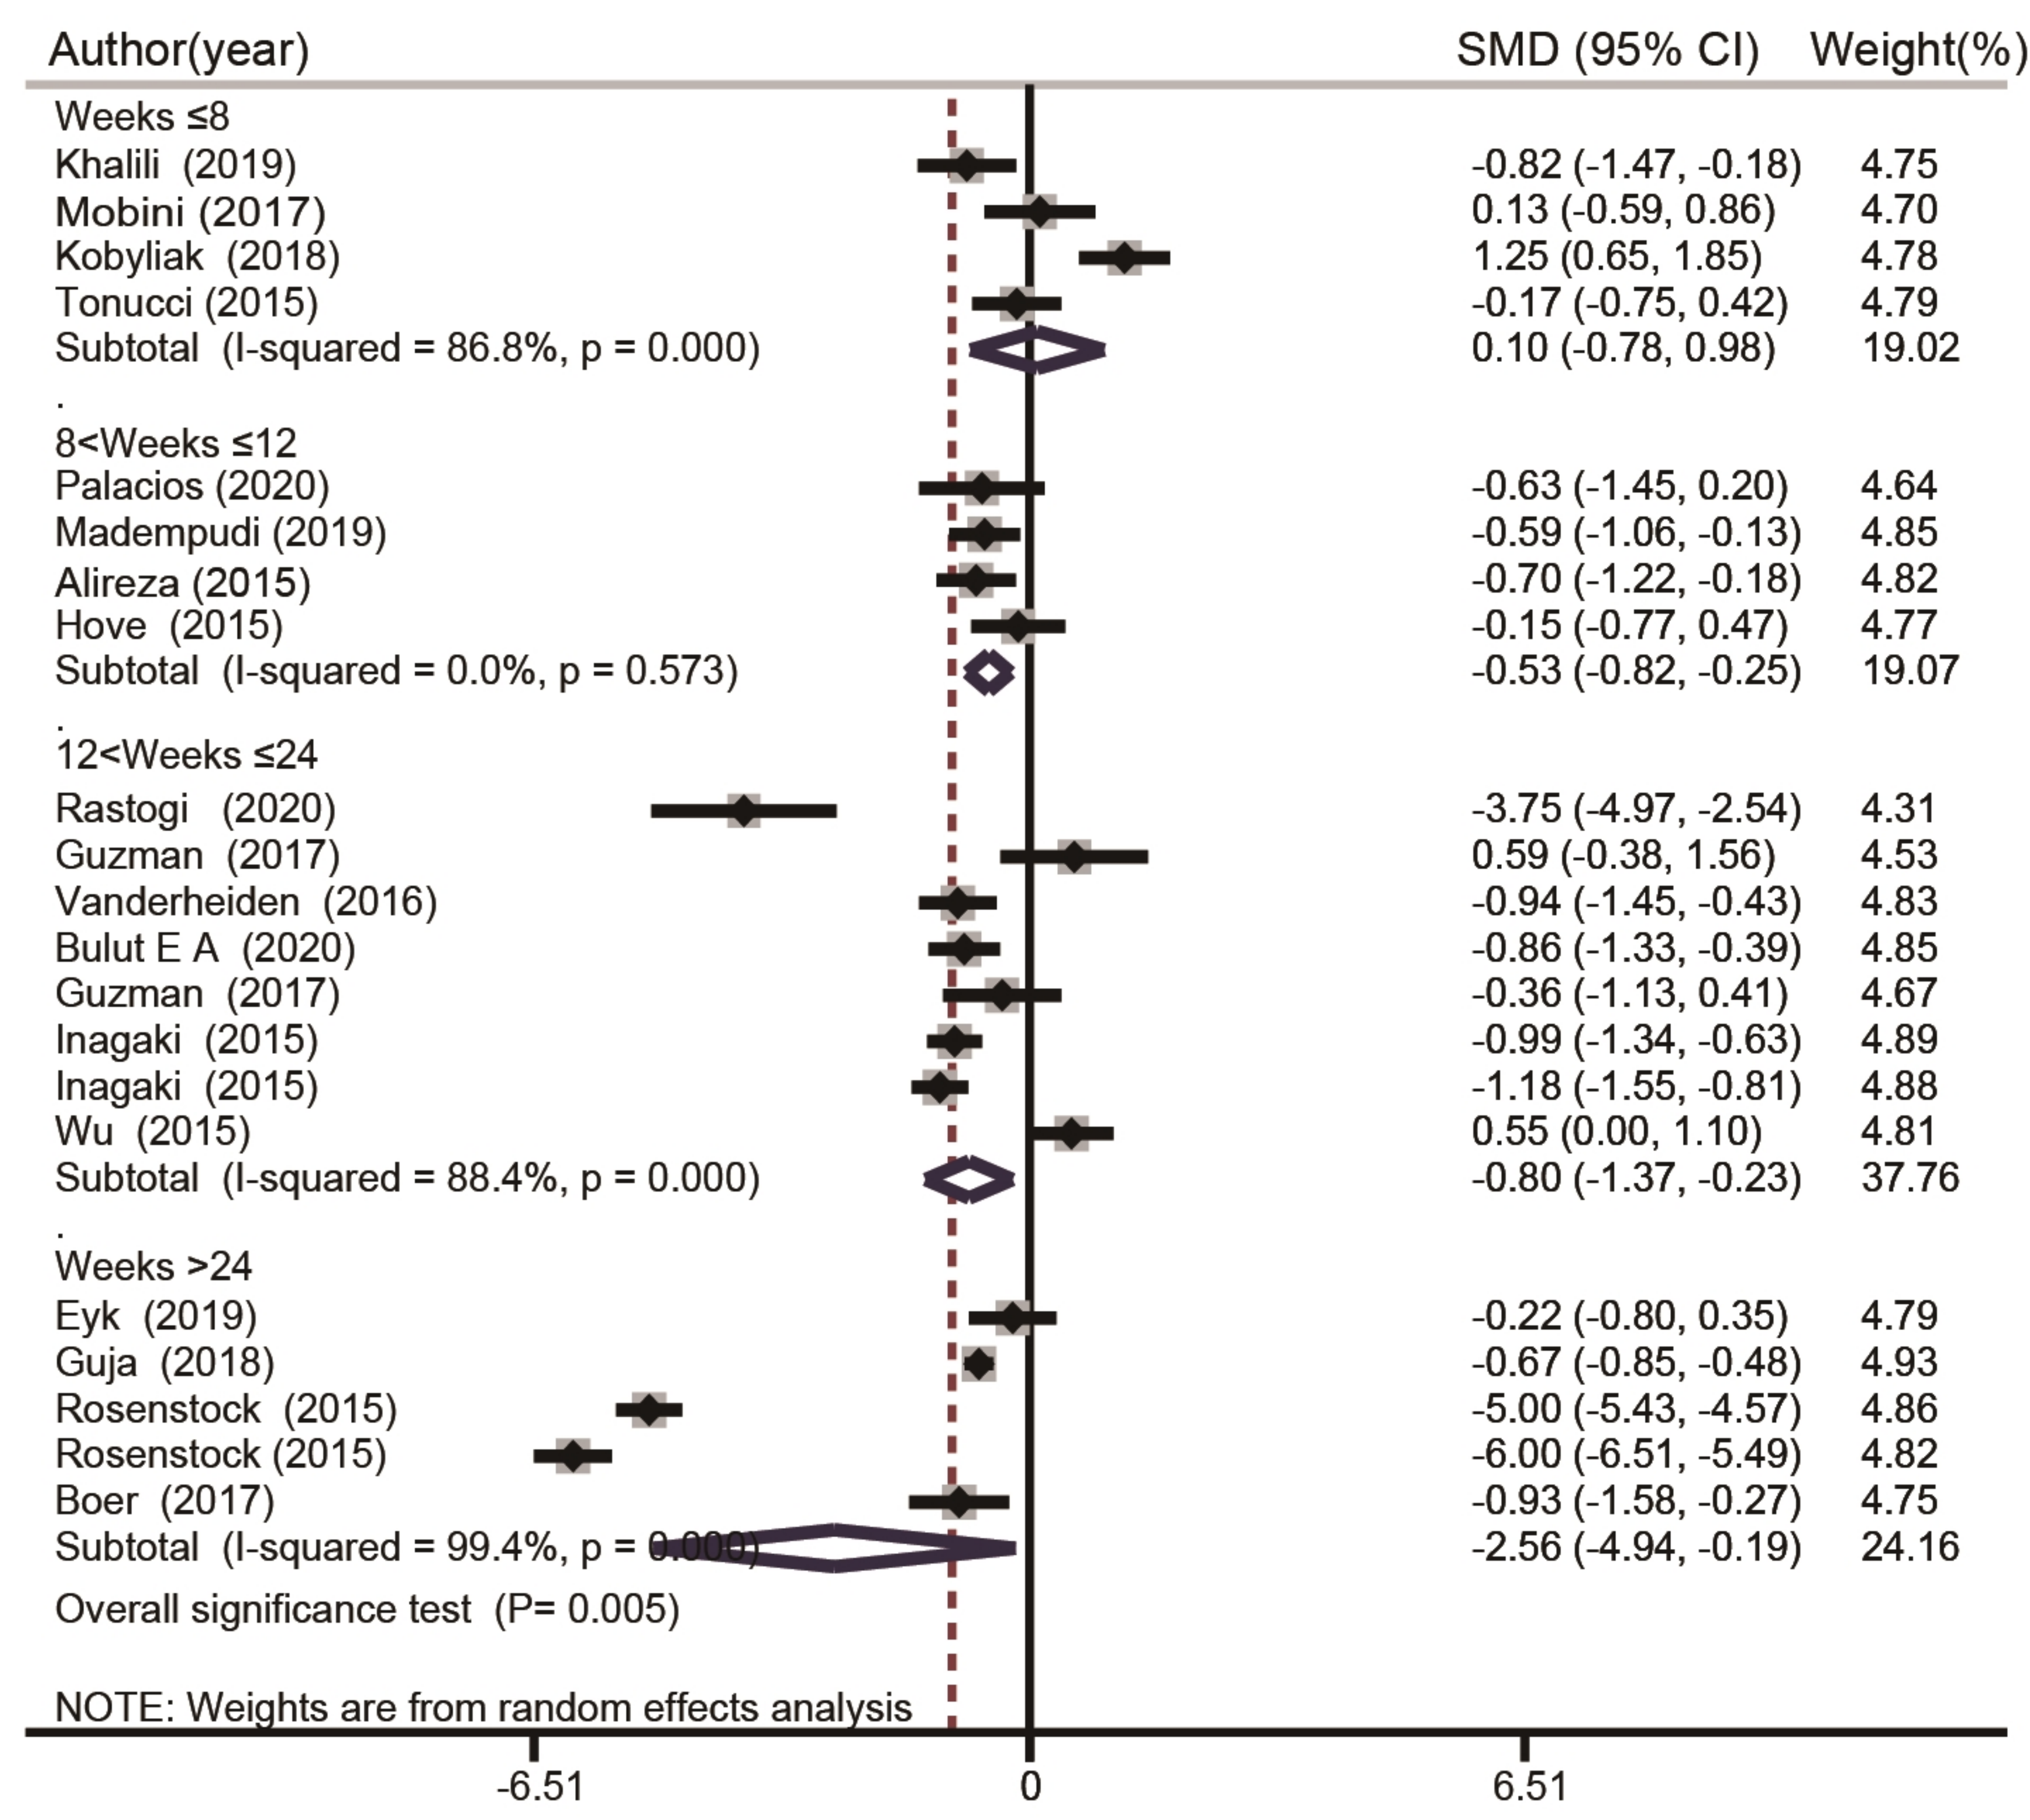

A

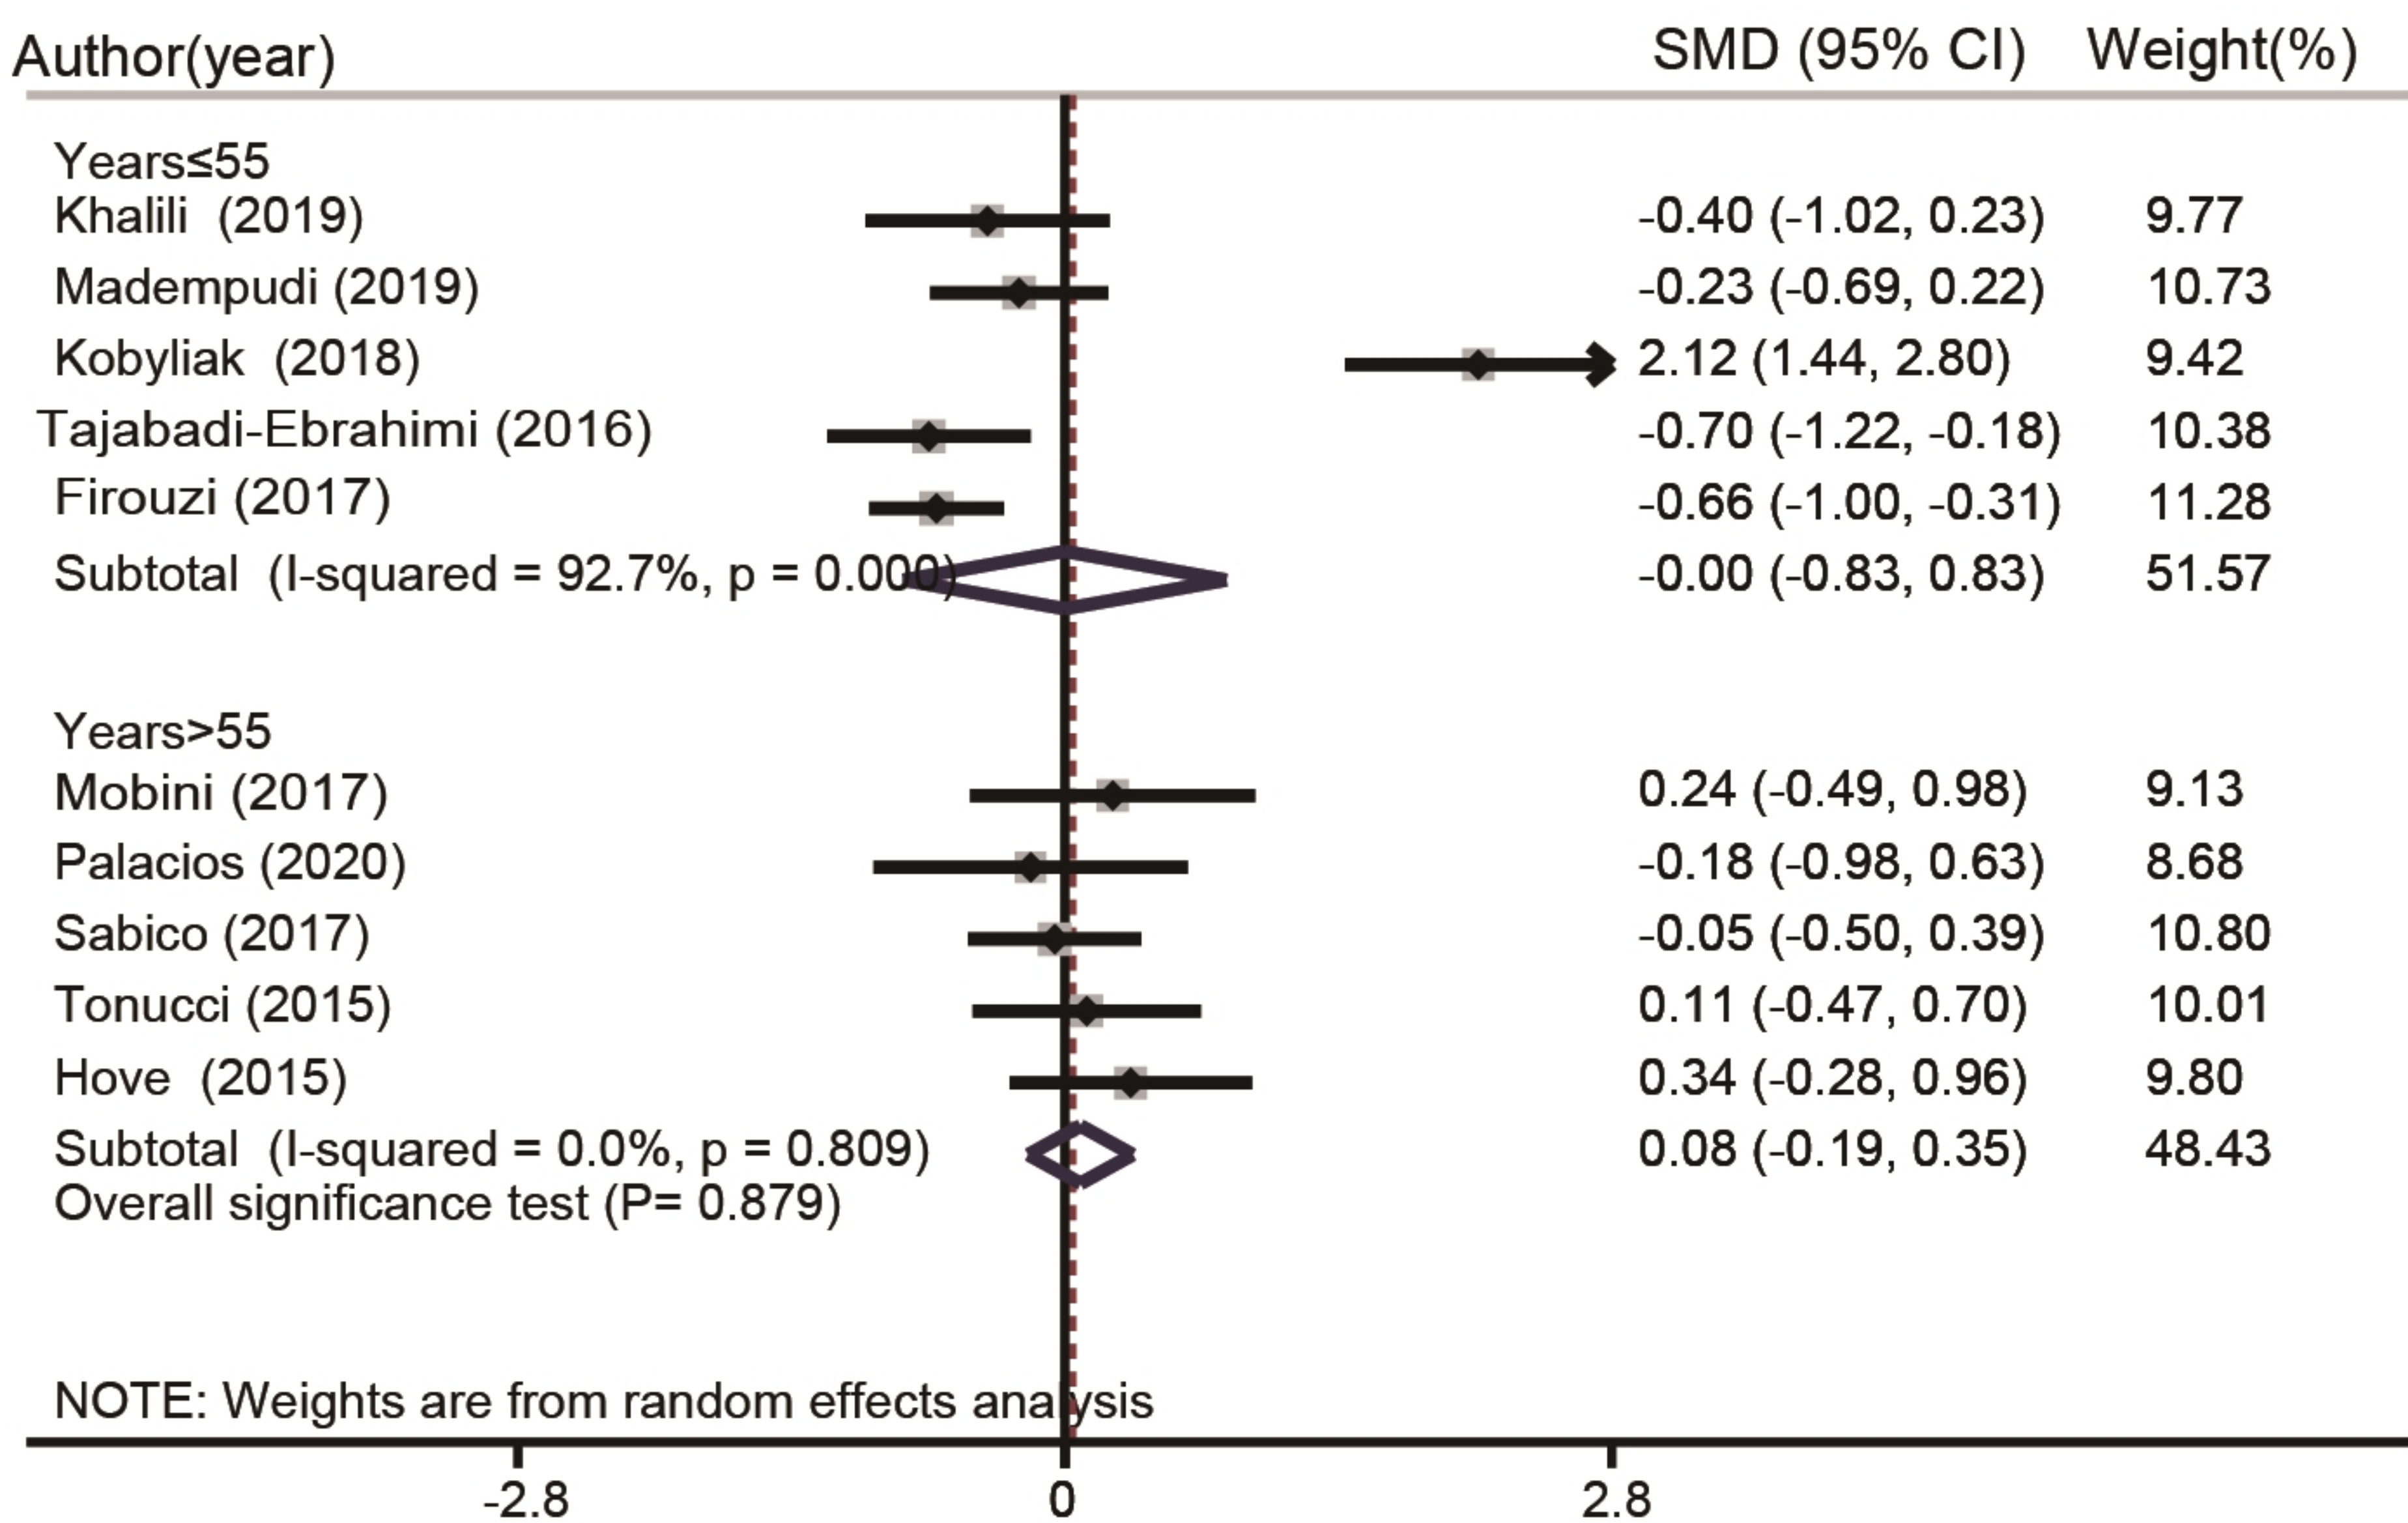

B

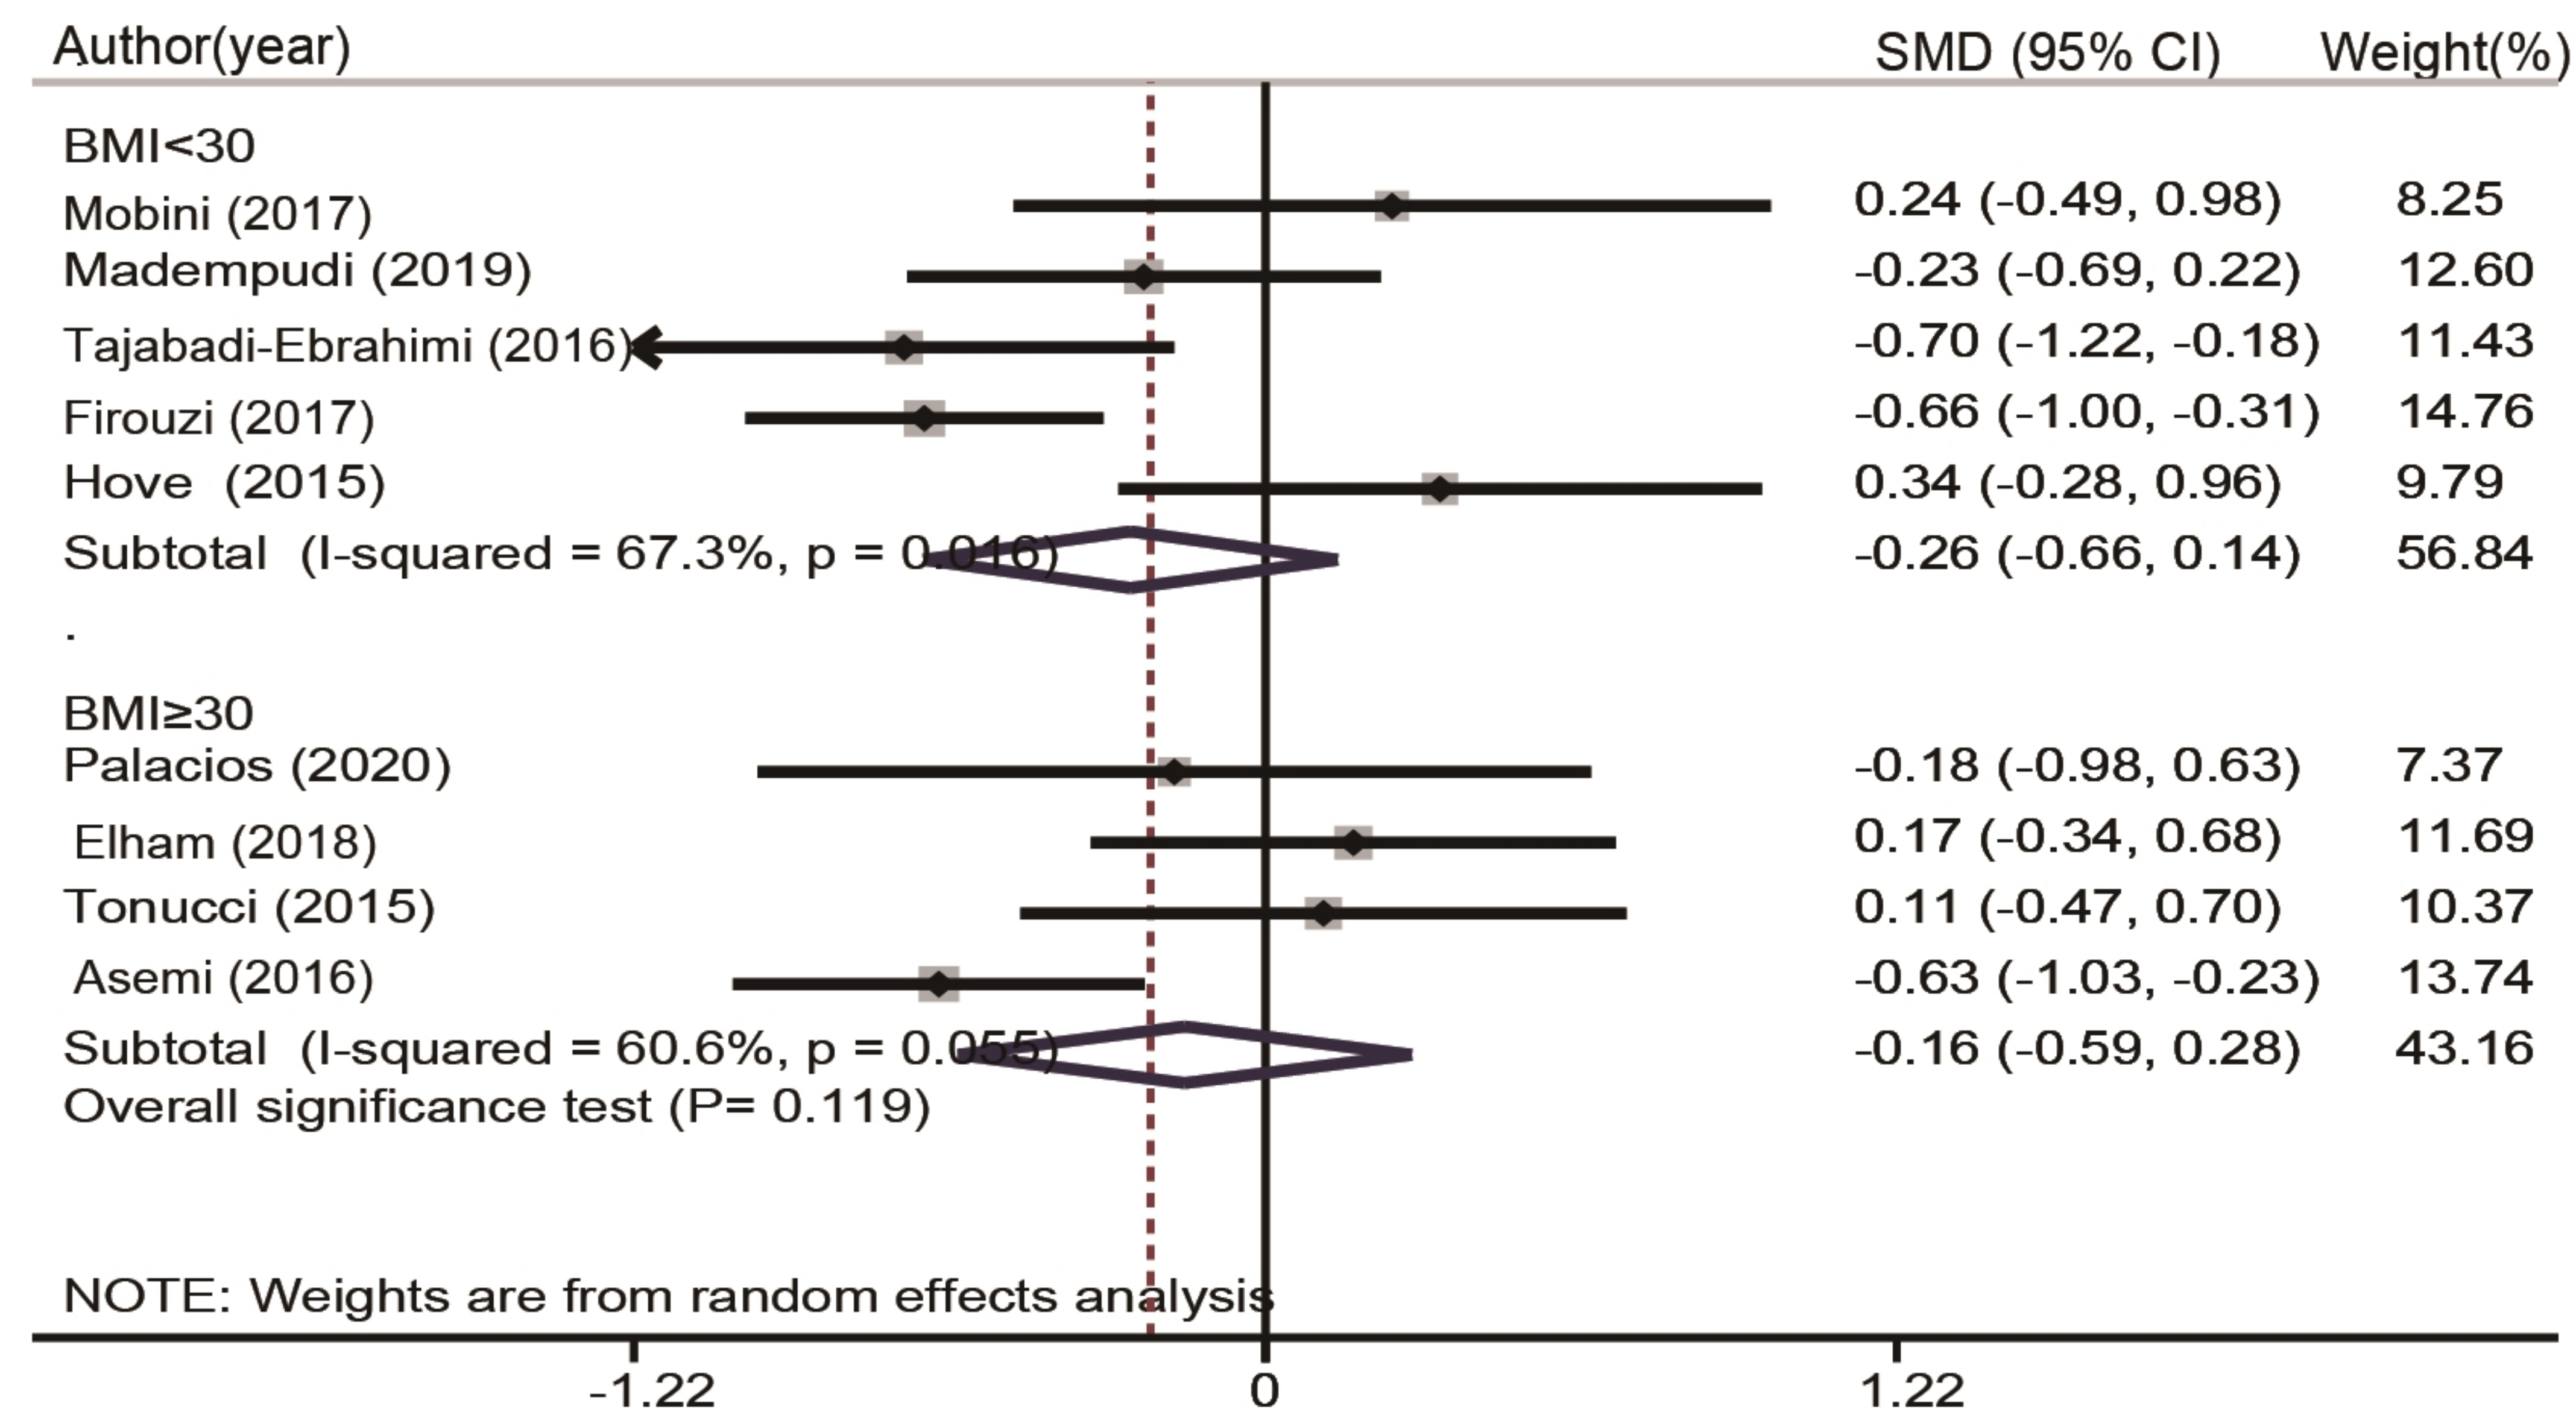

C

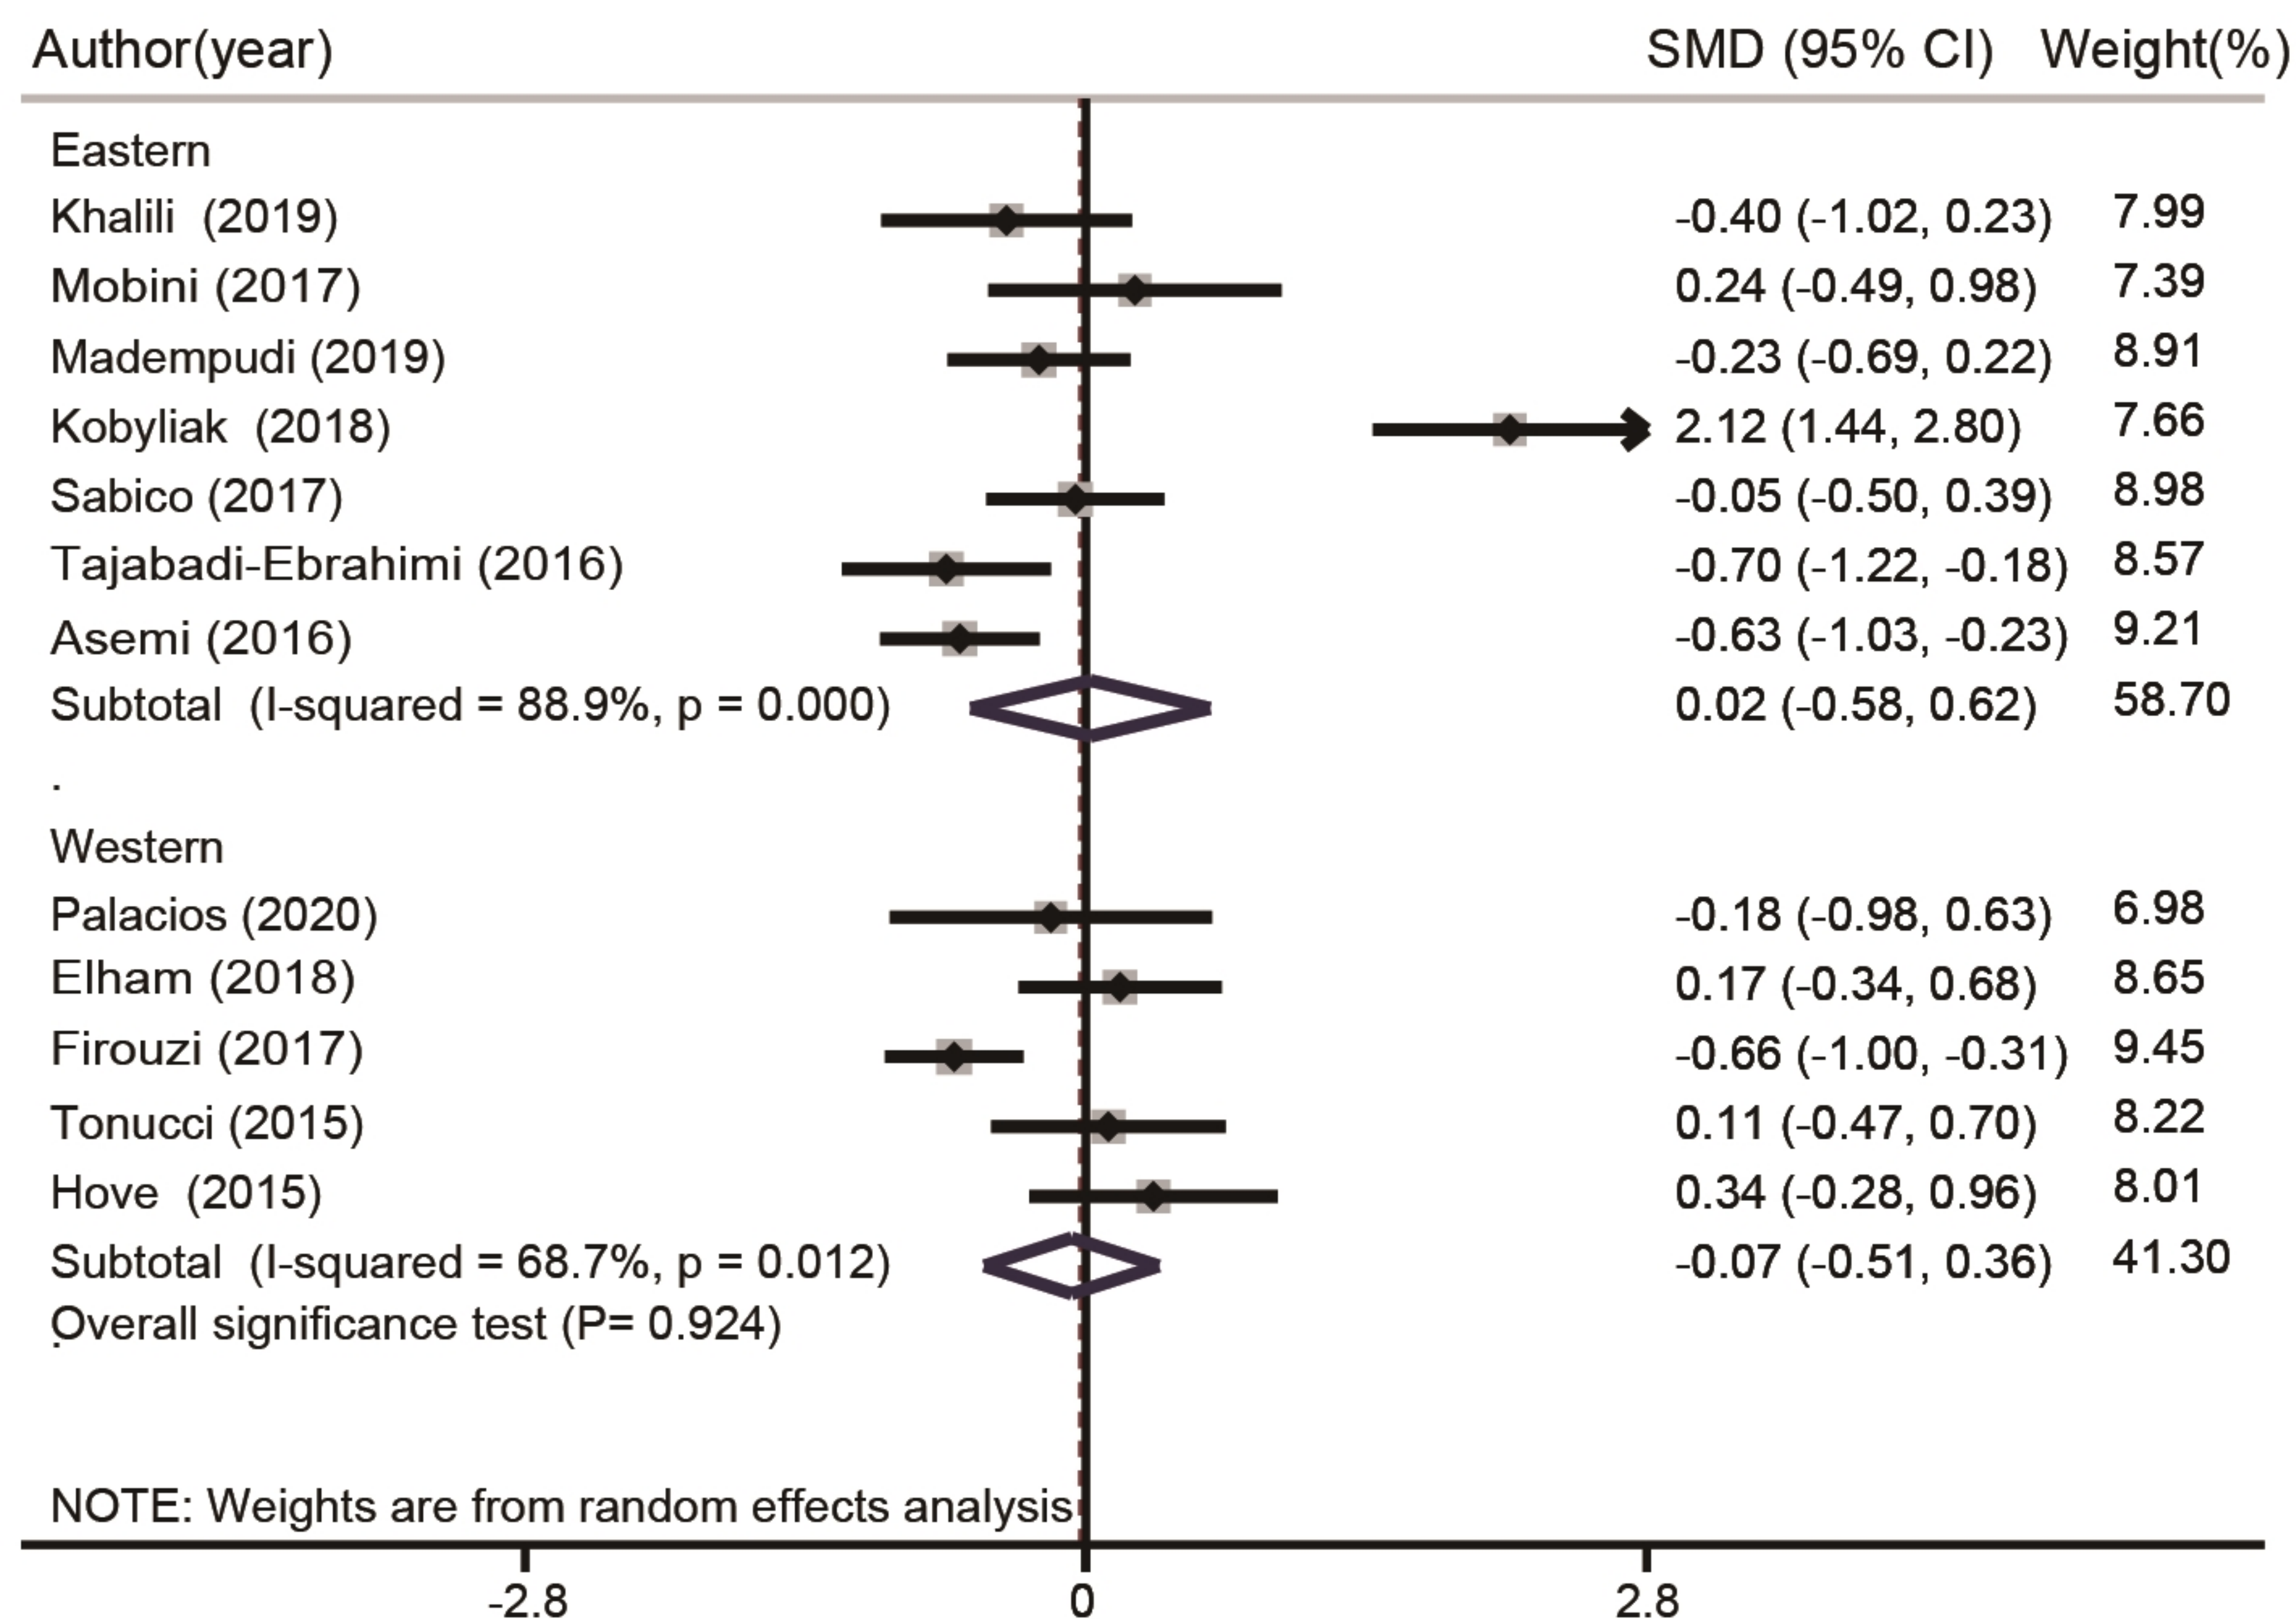

D

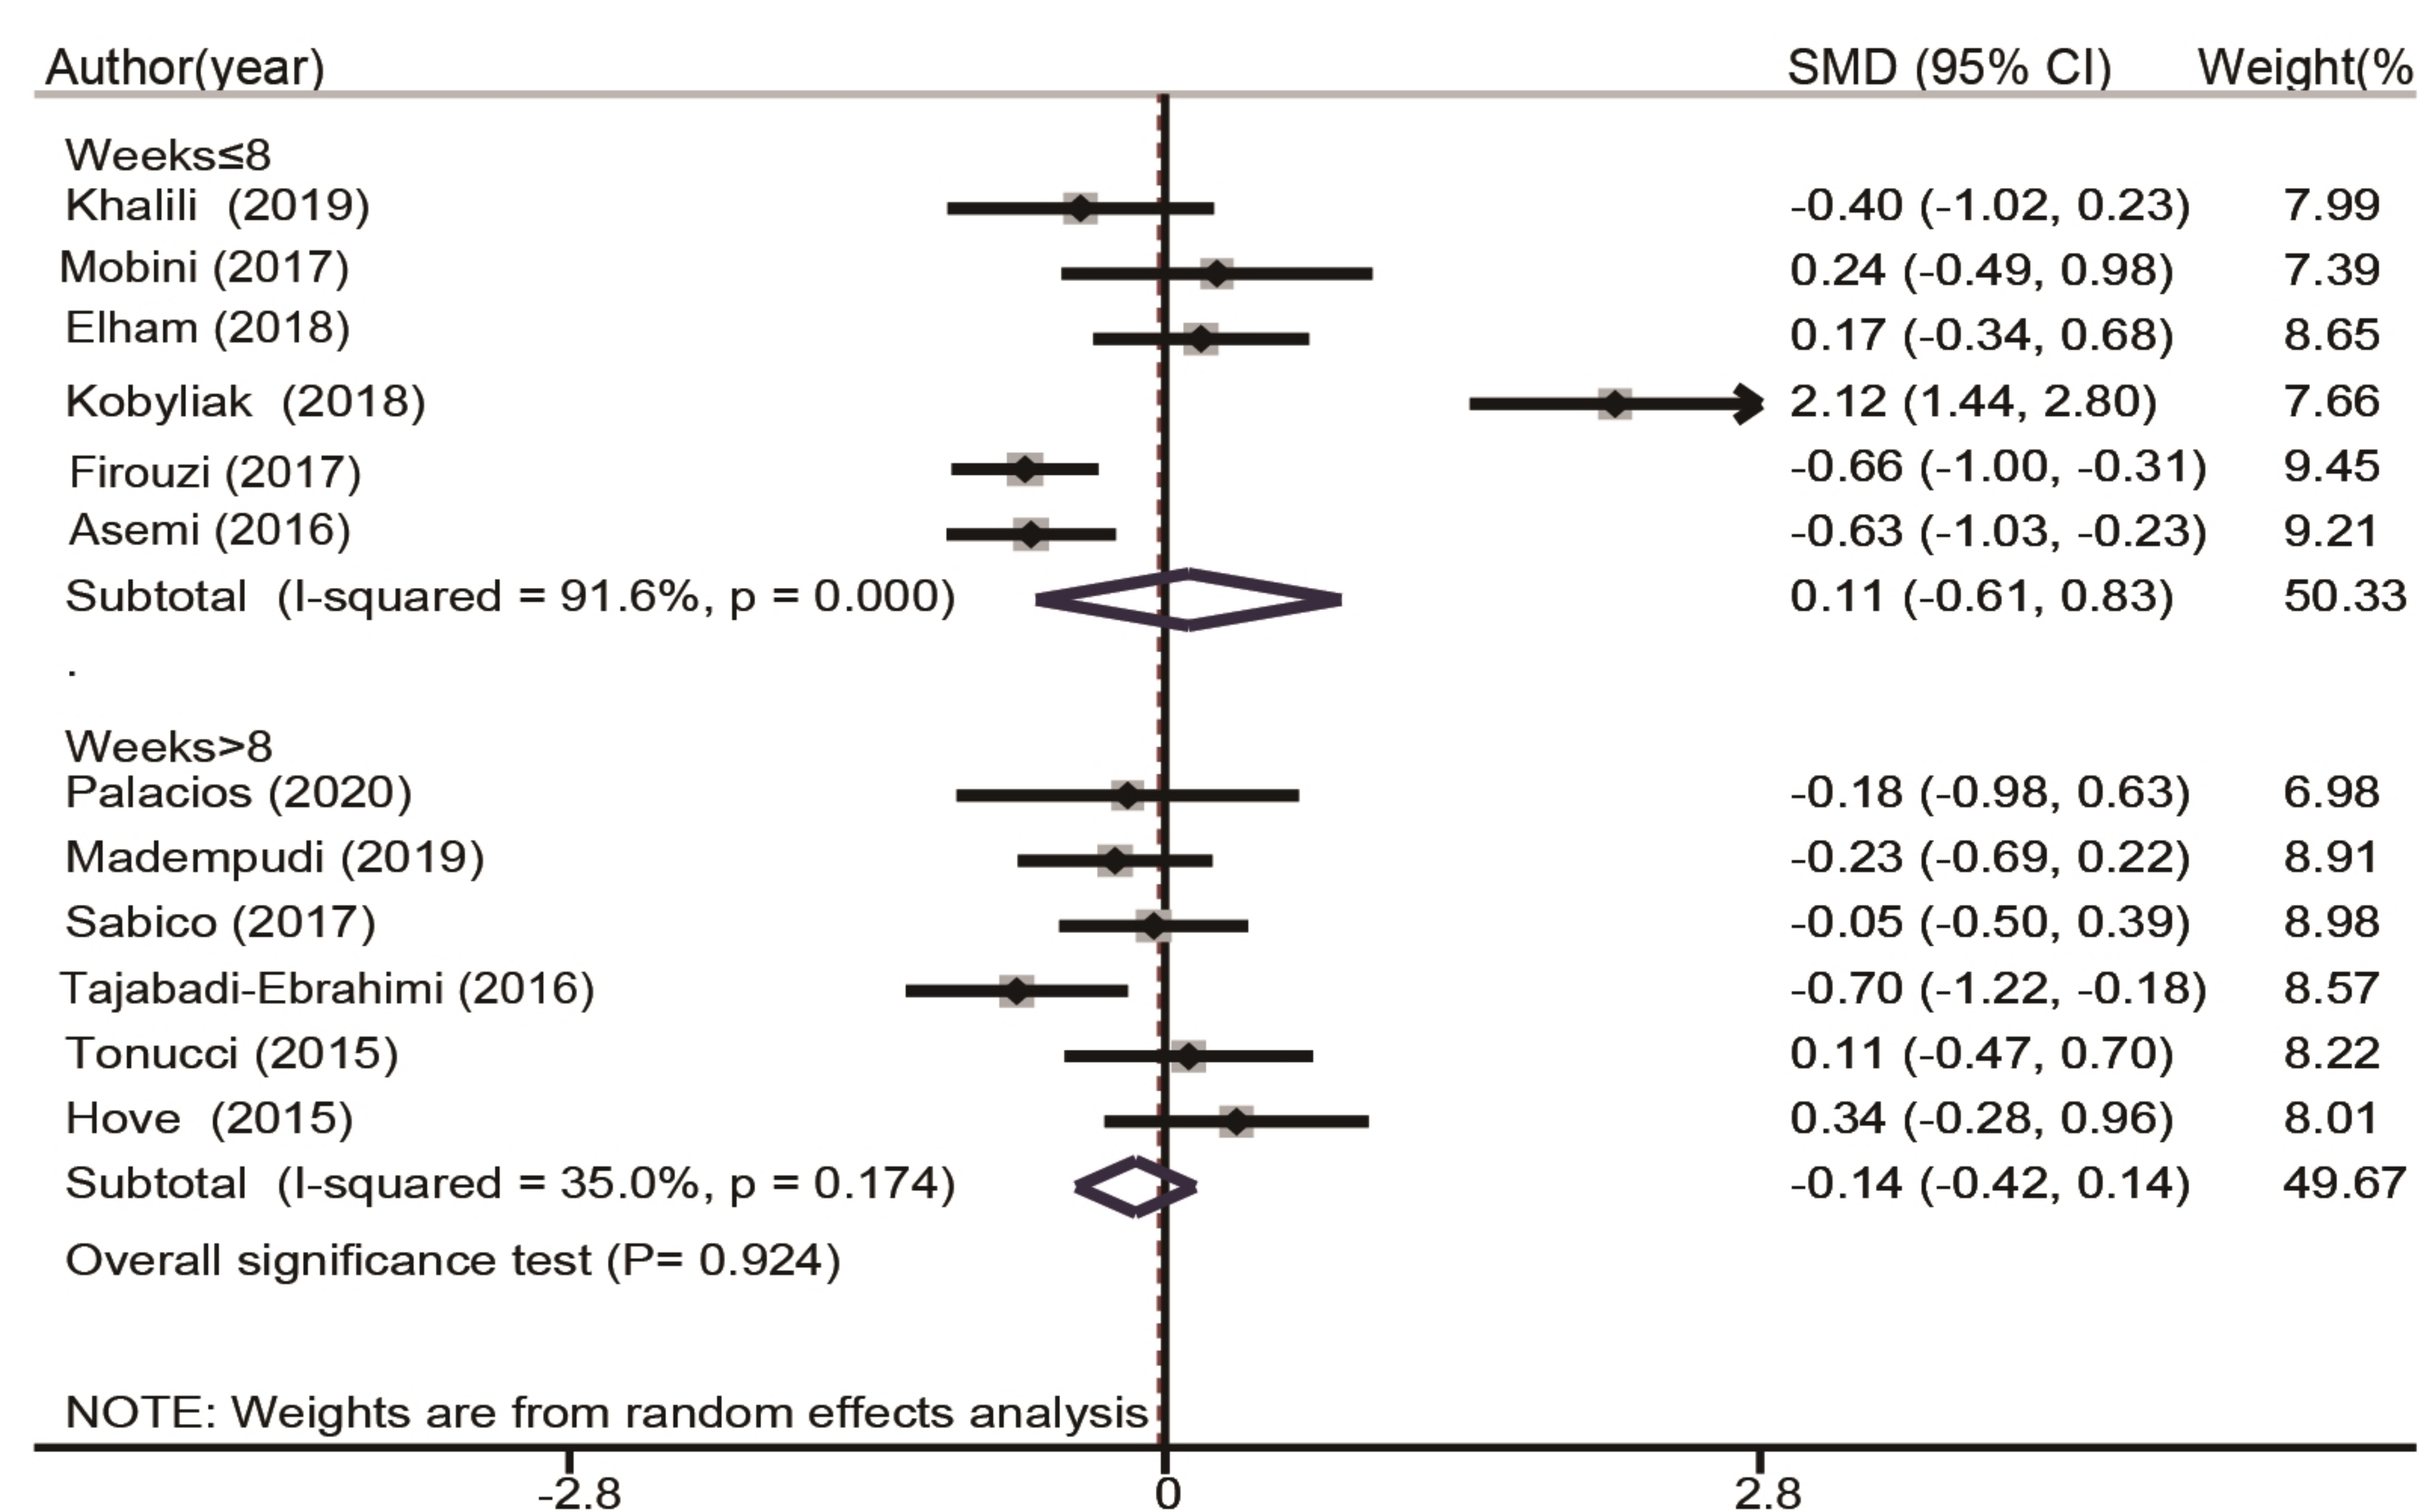

**A**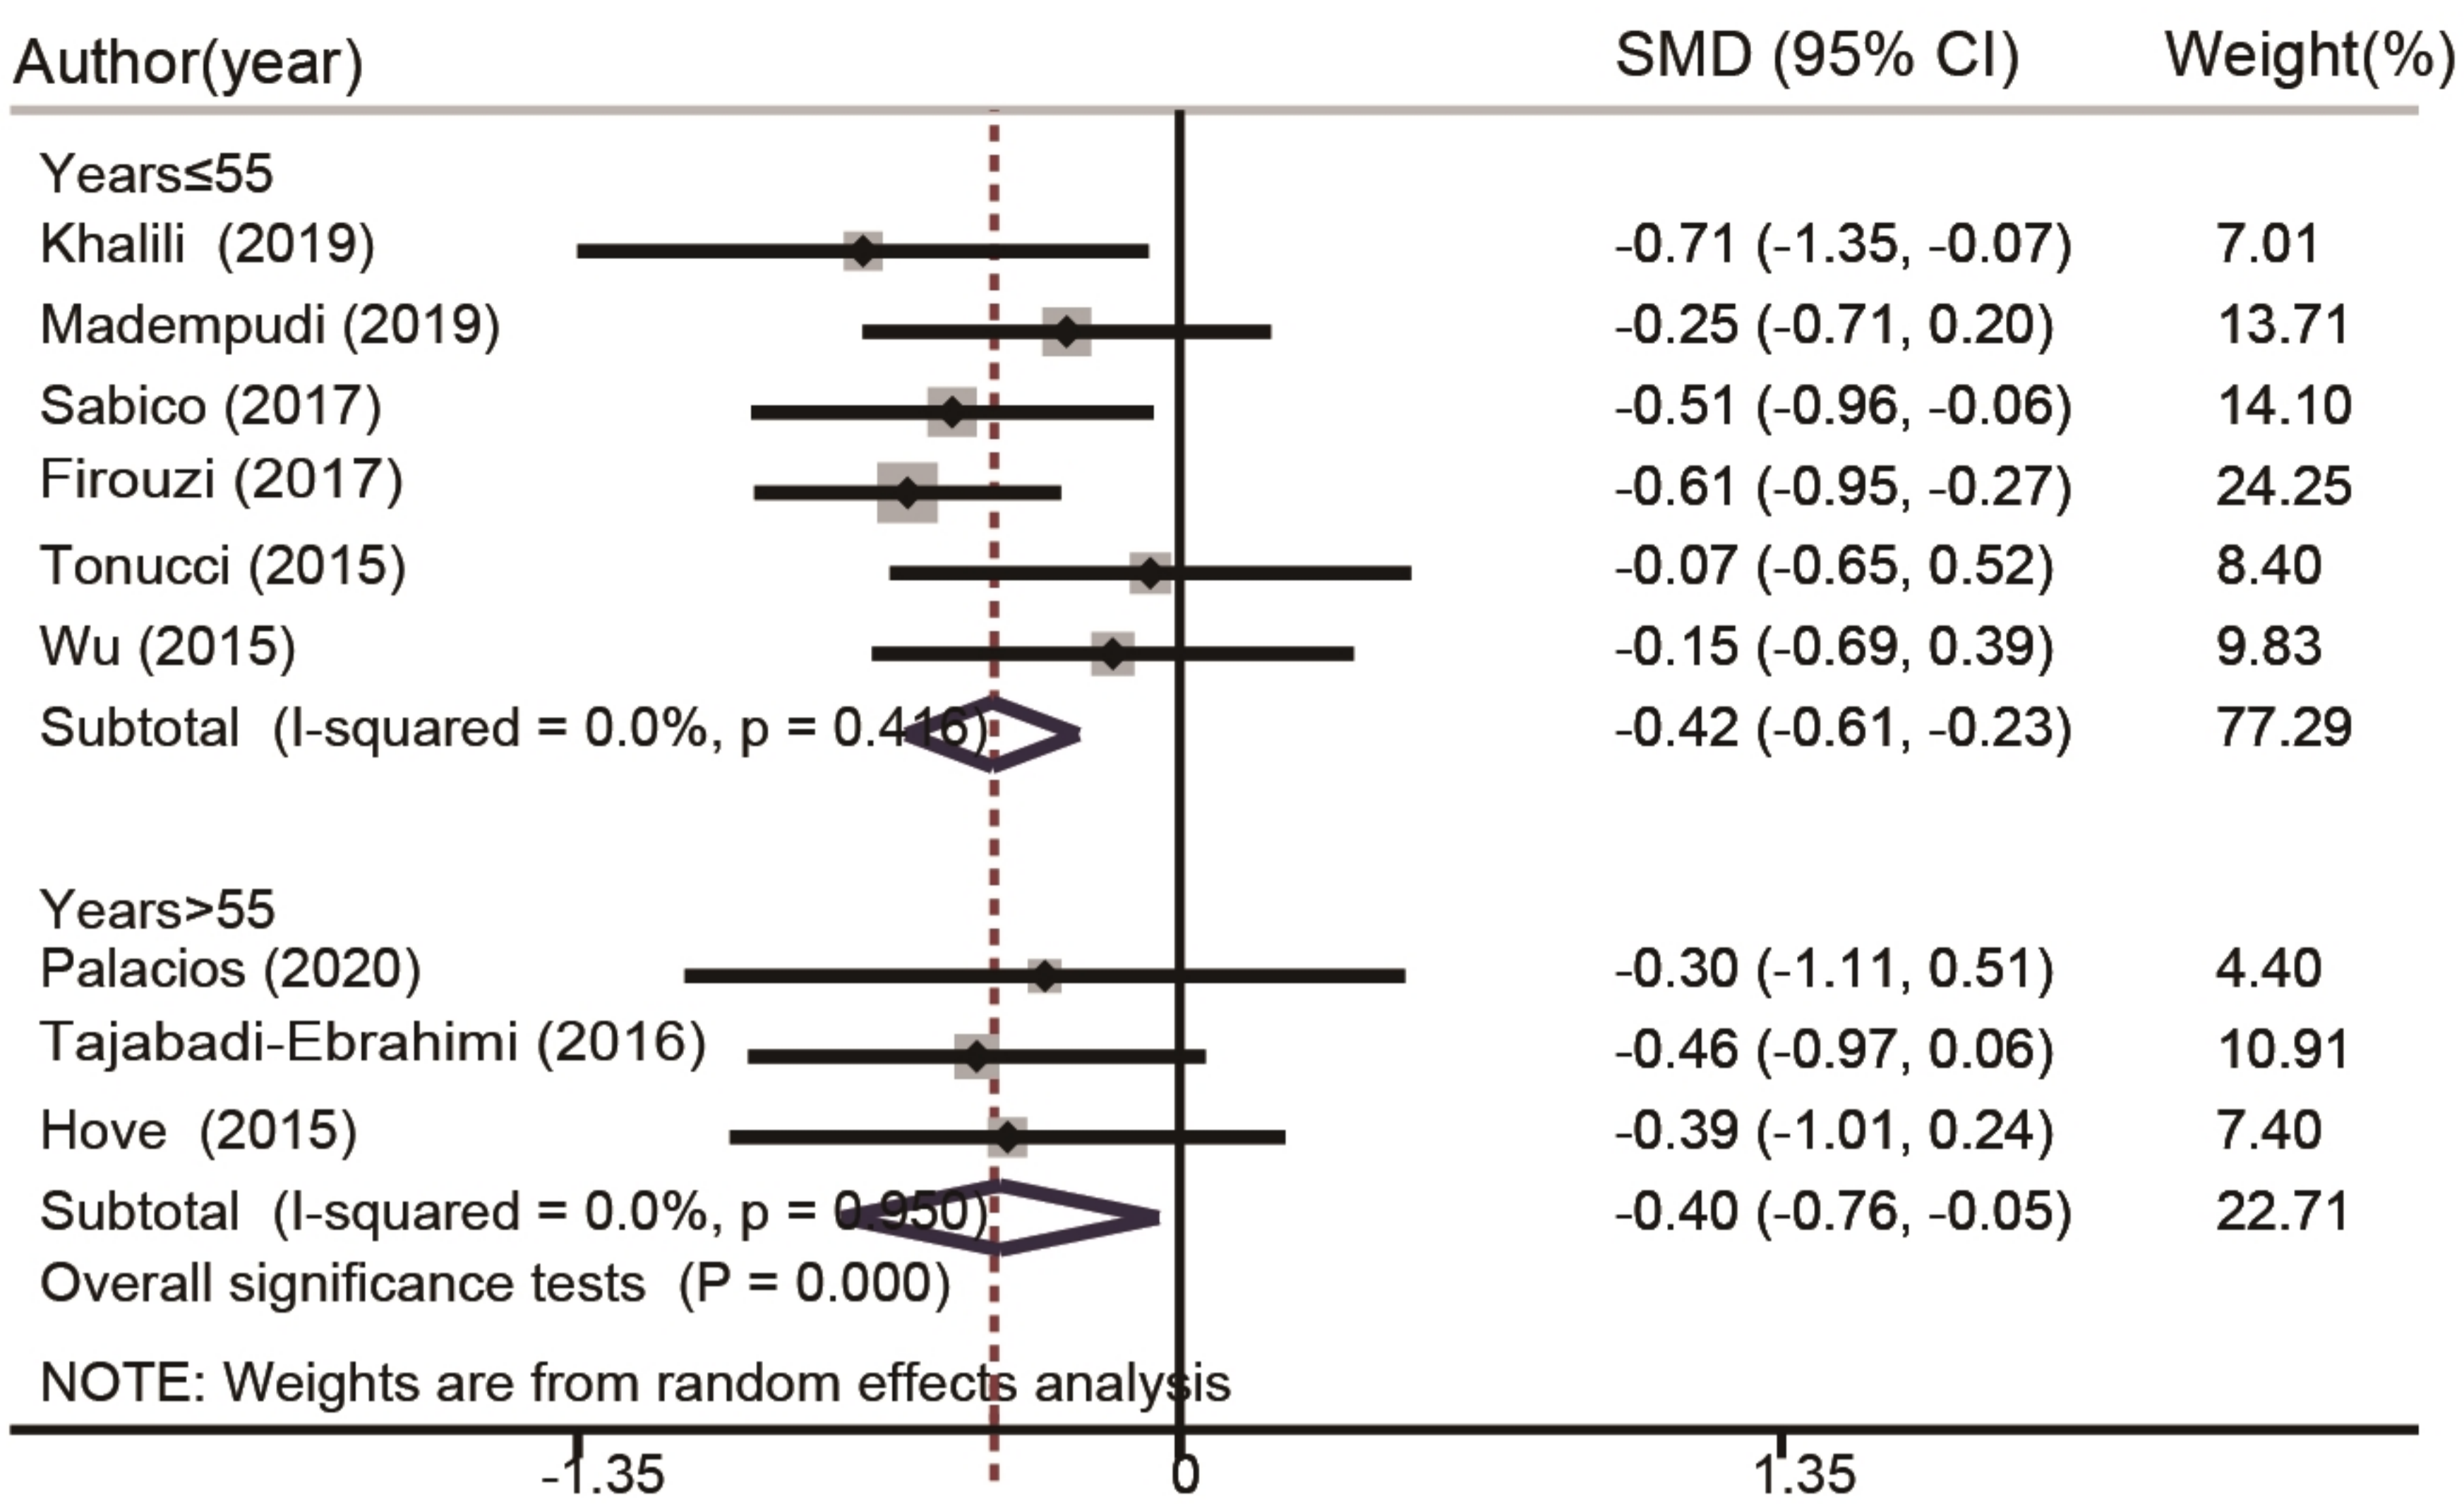**B**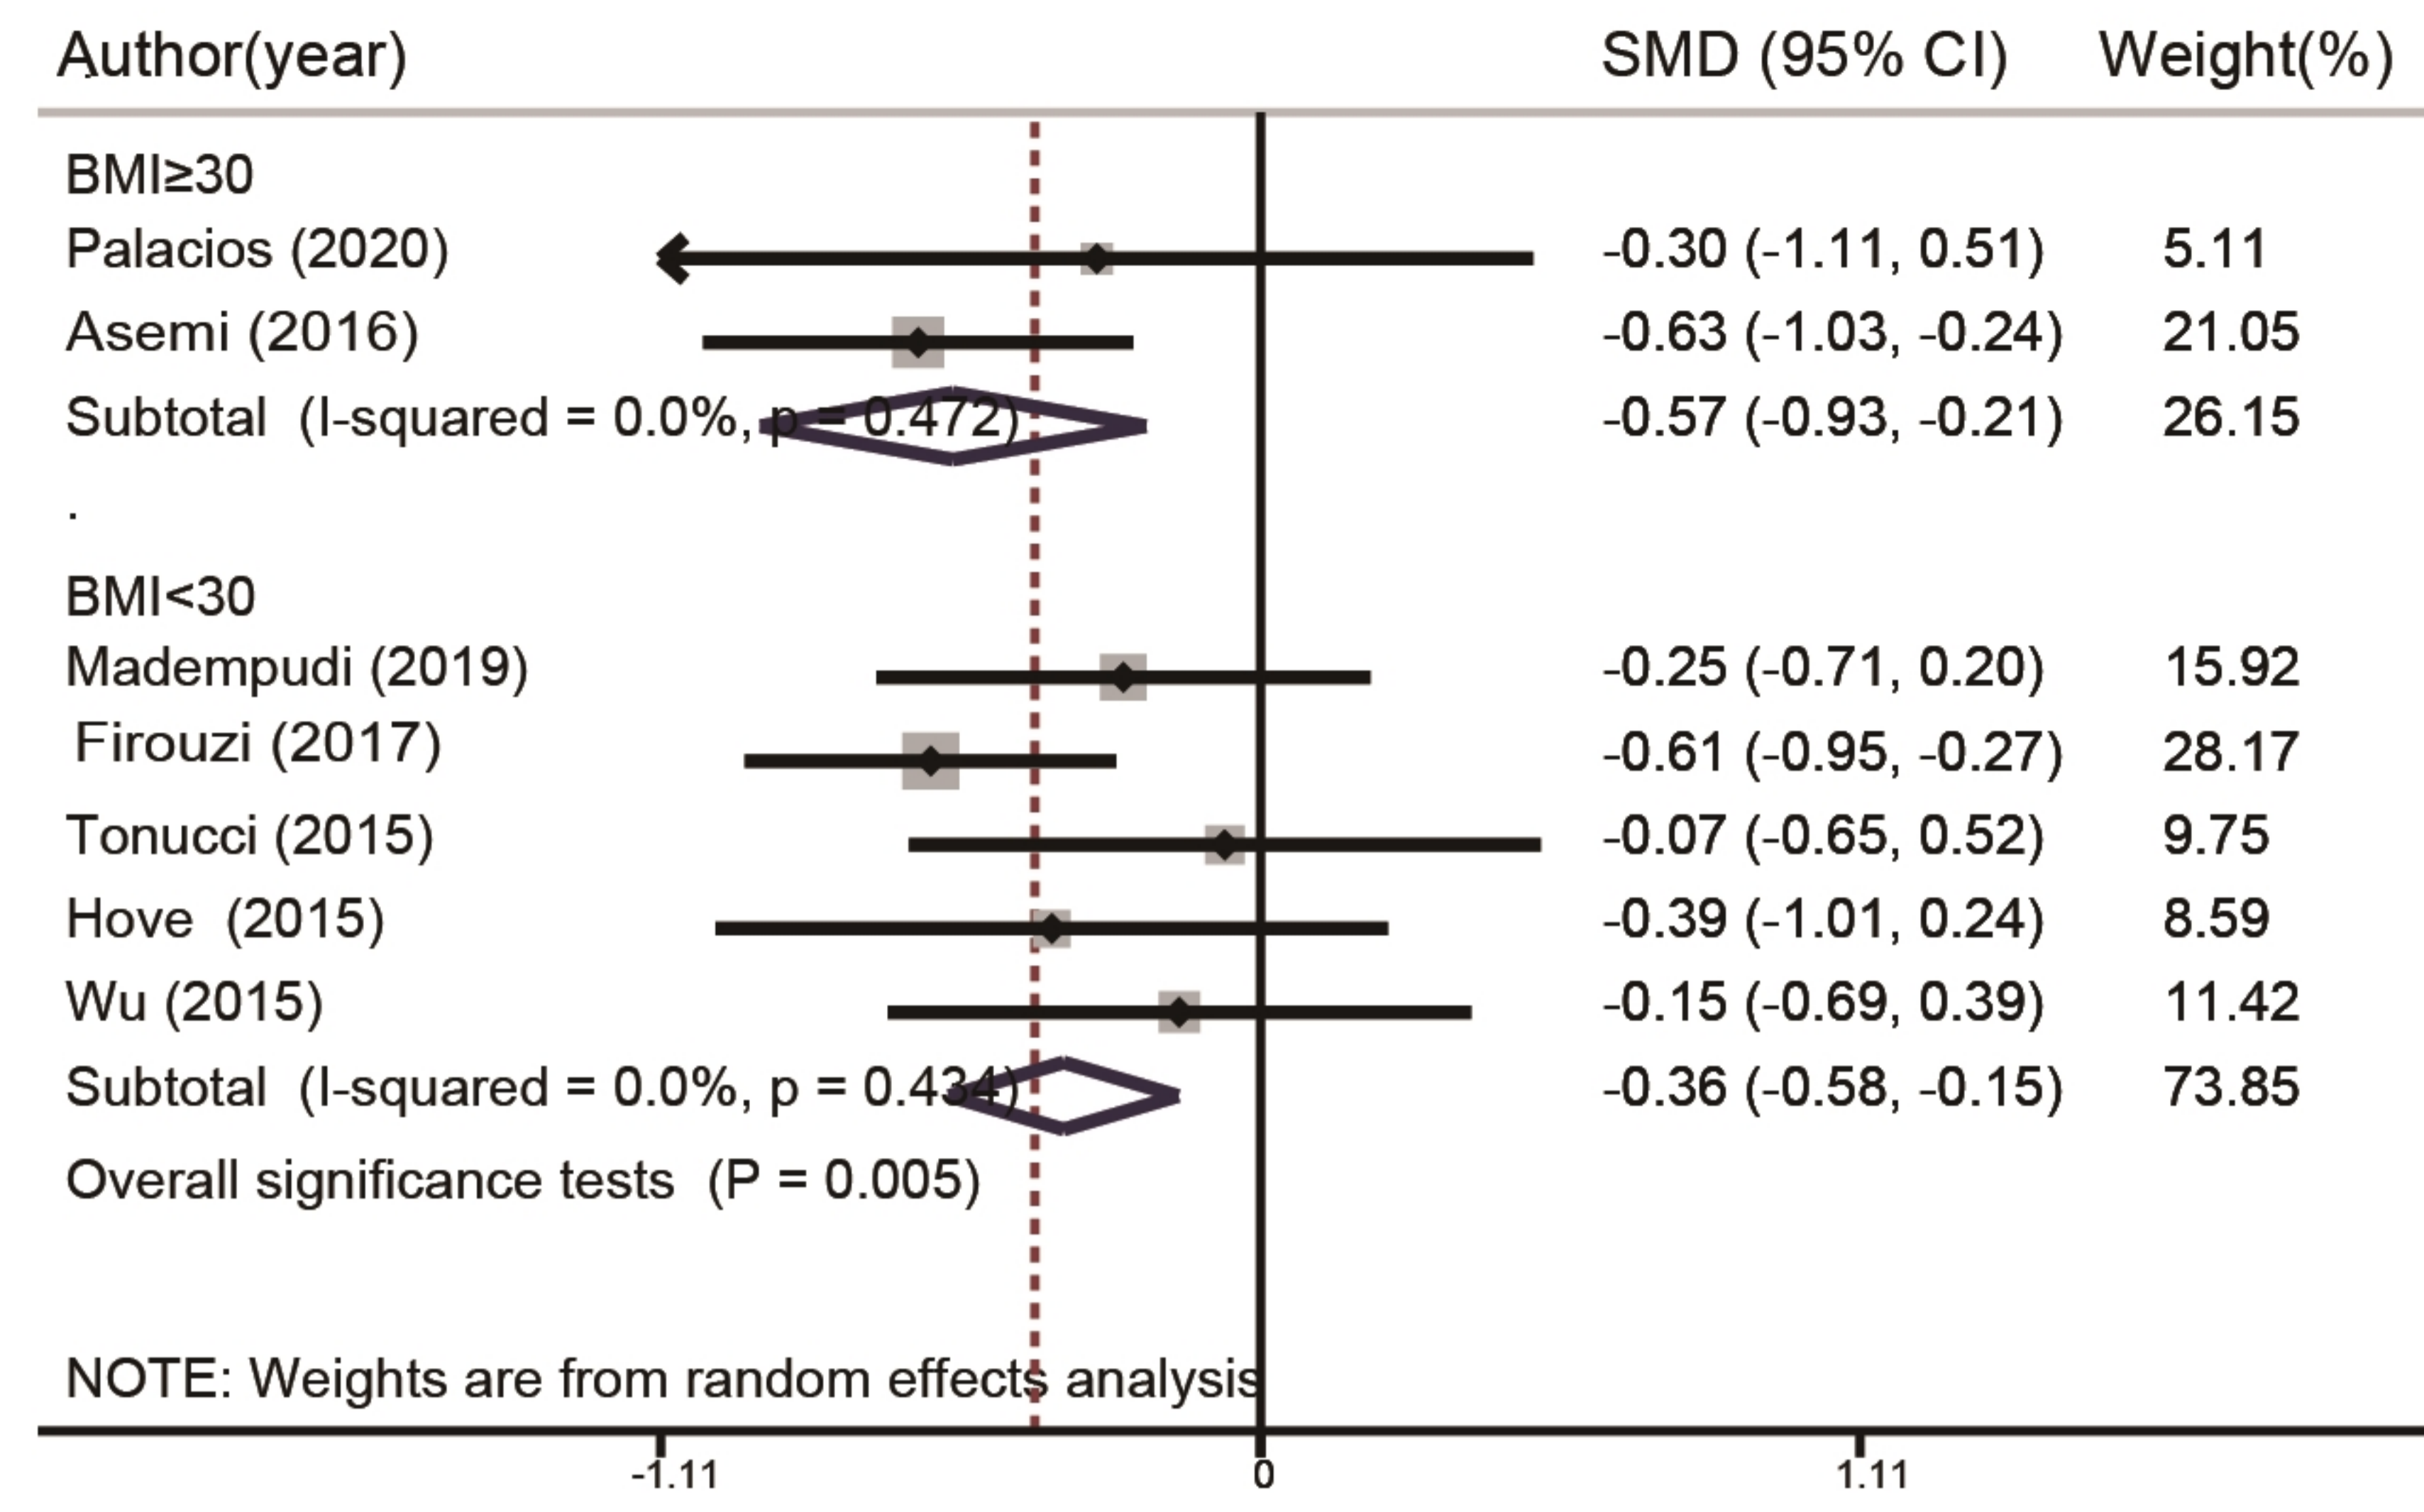**C**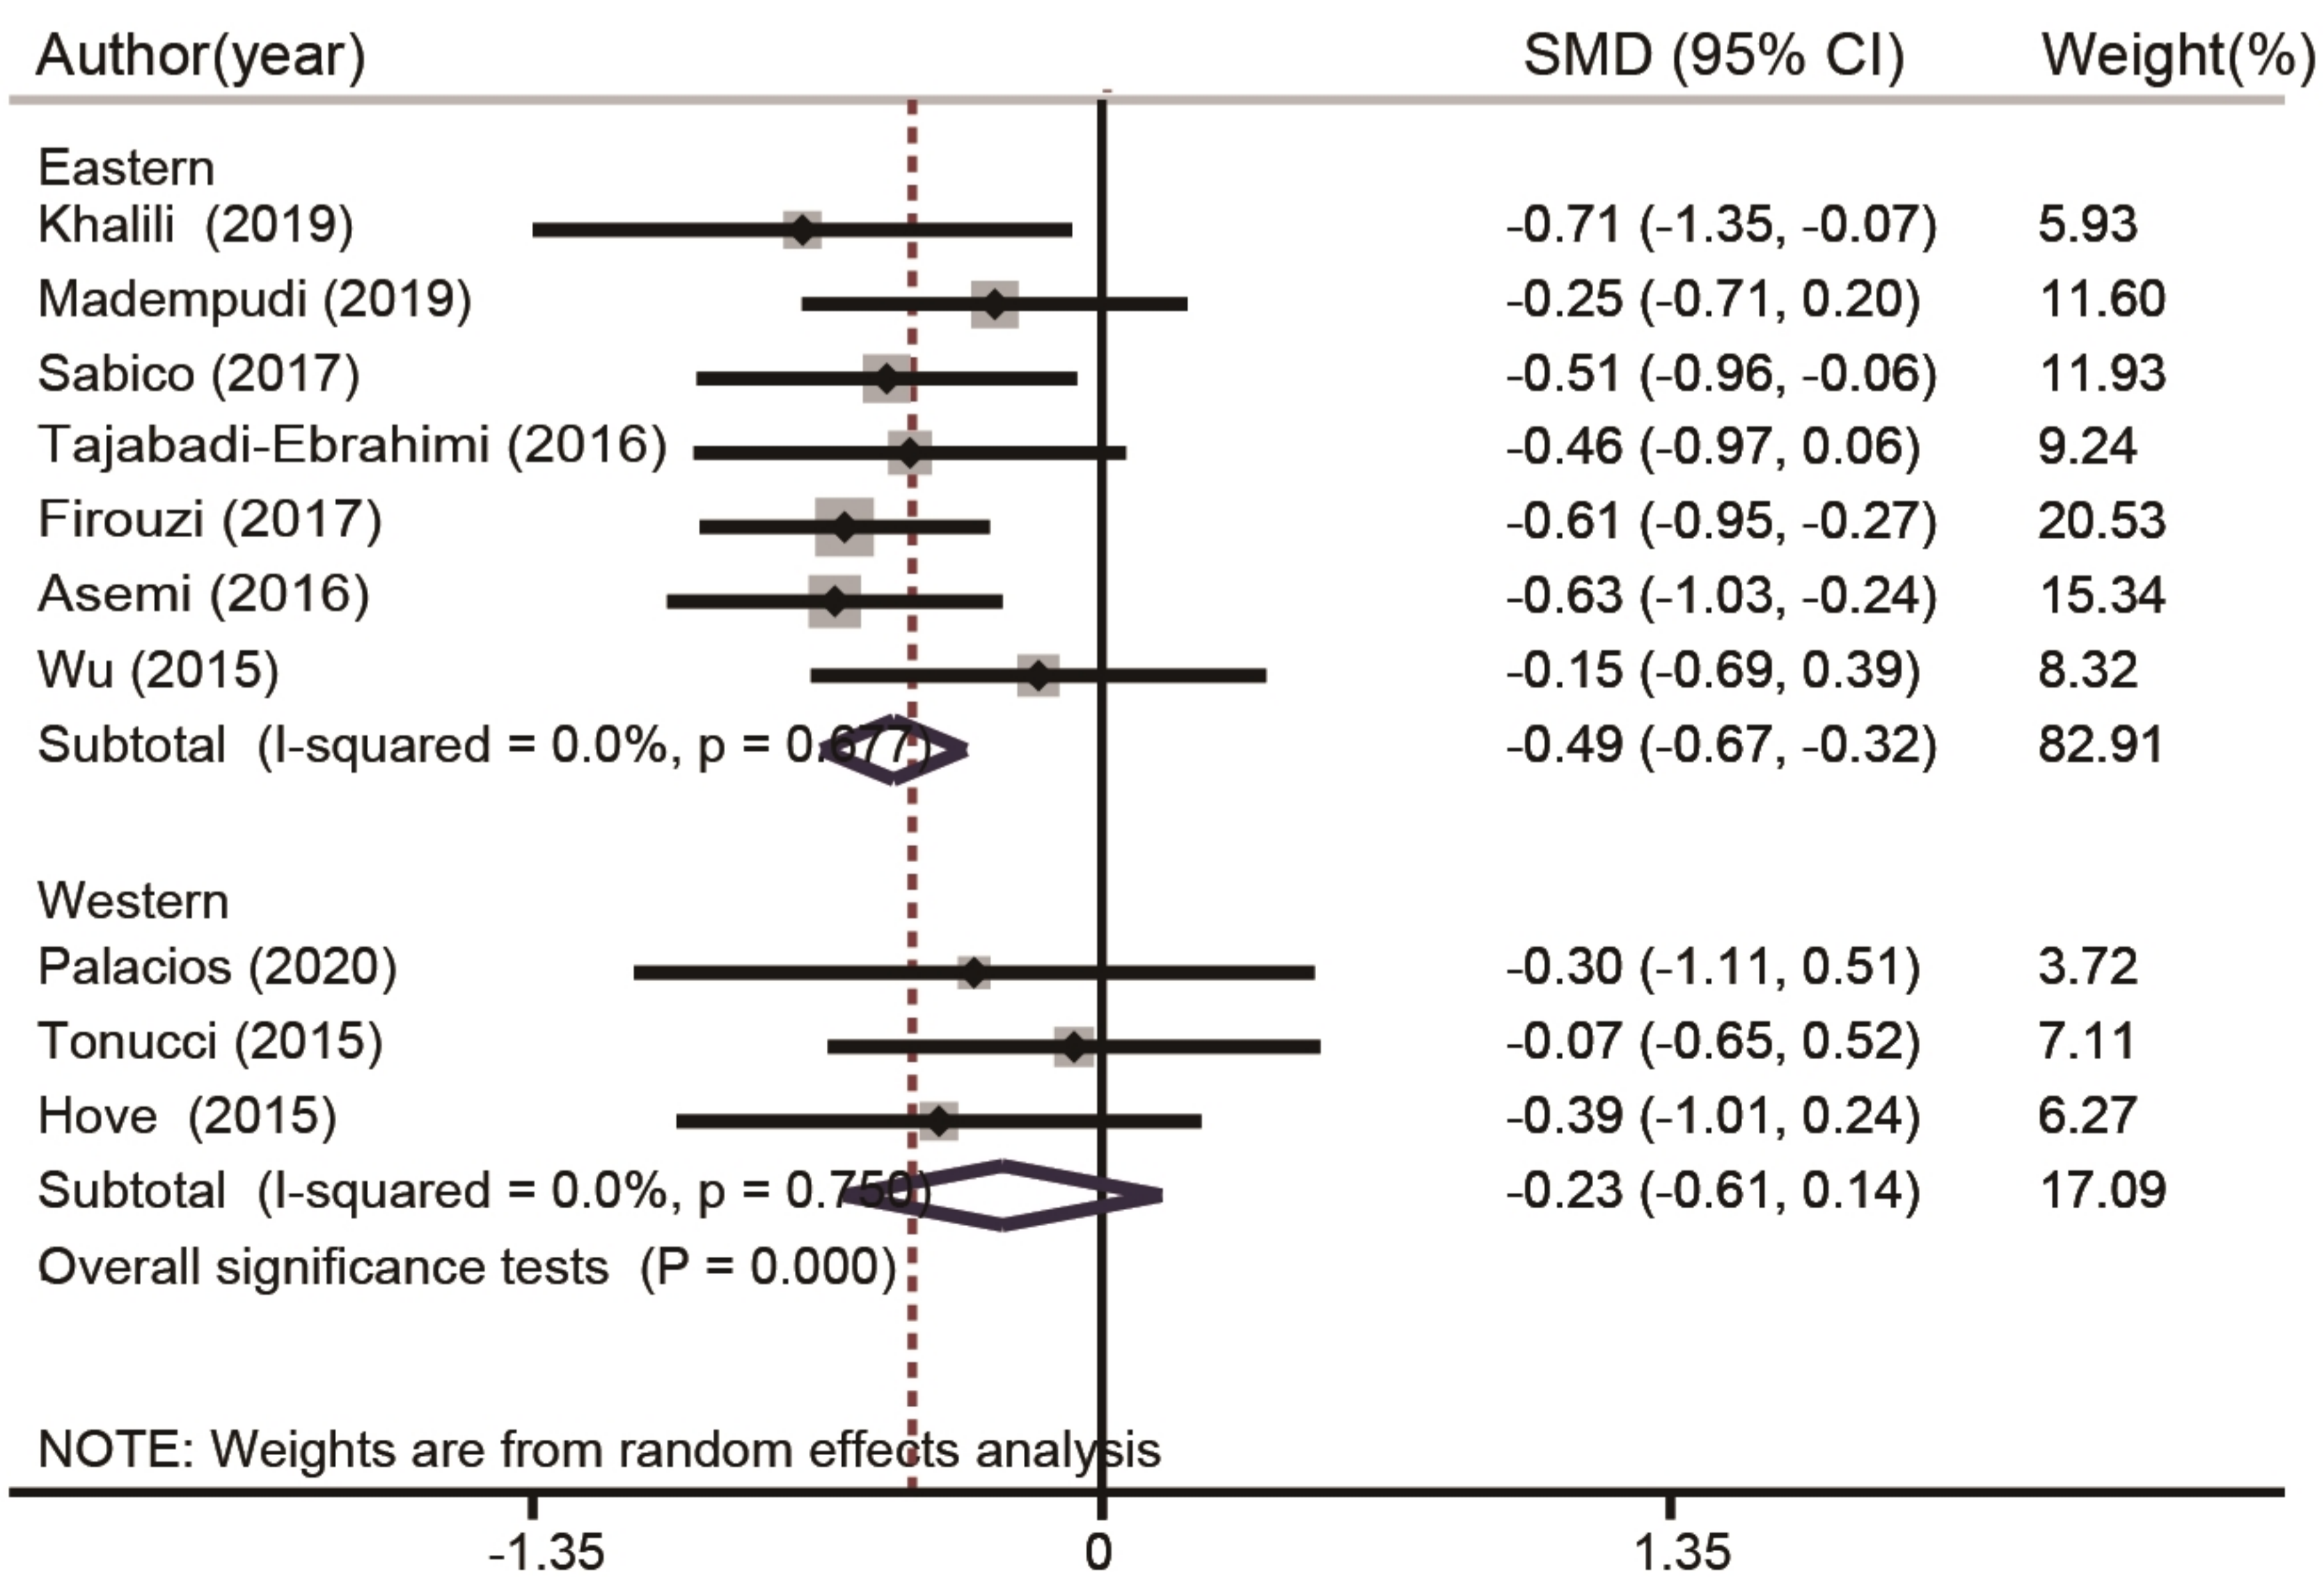**D**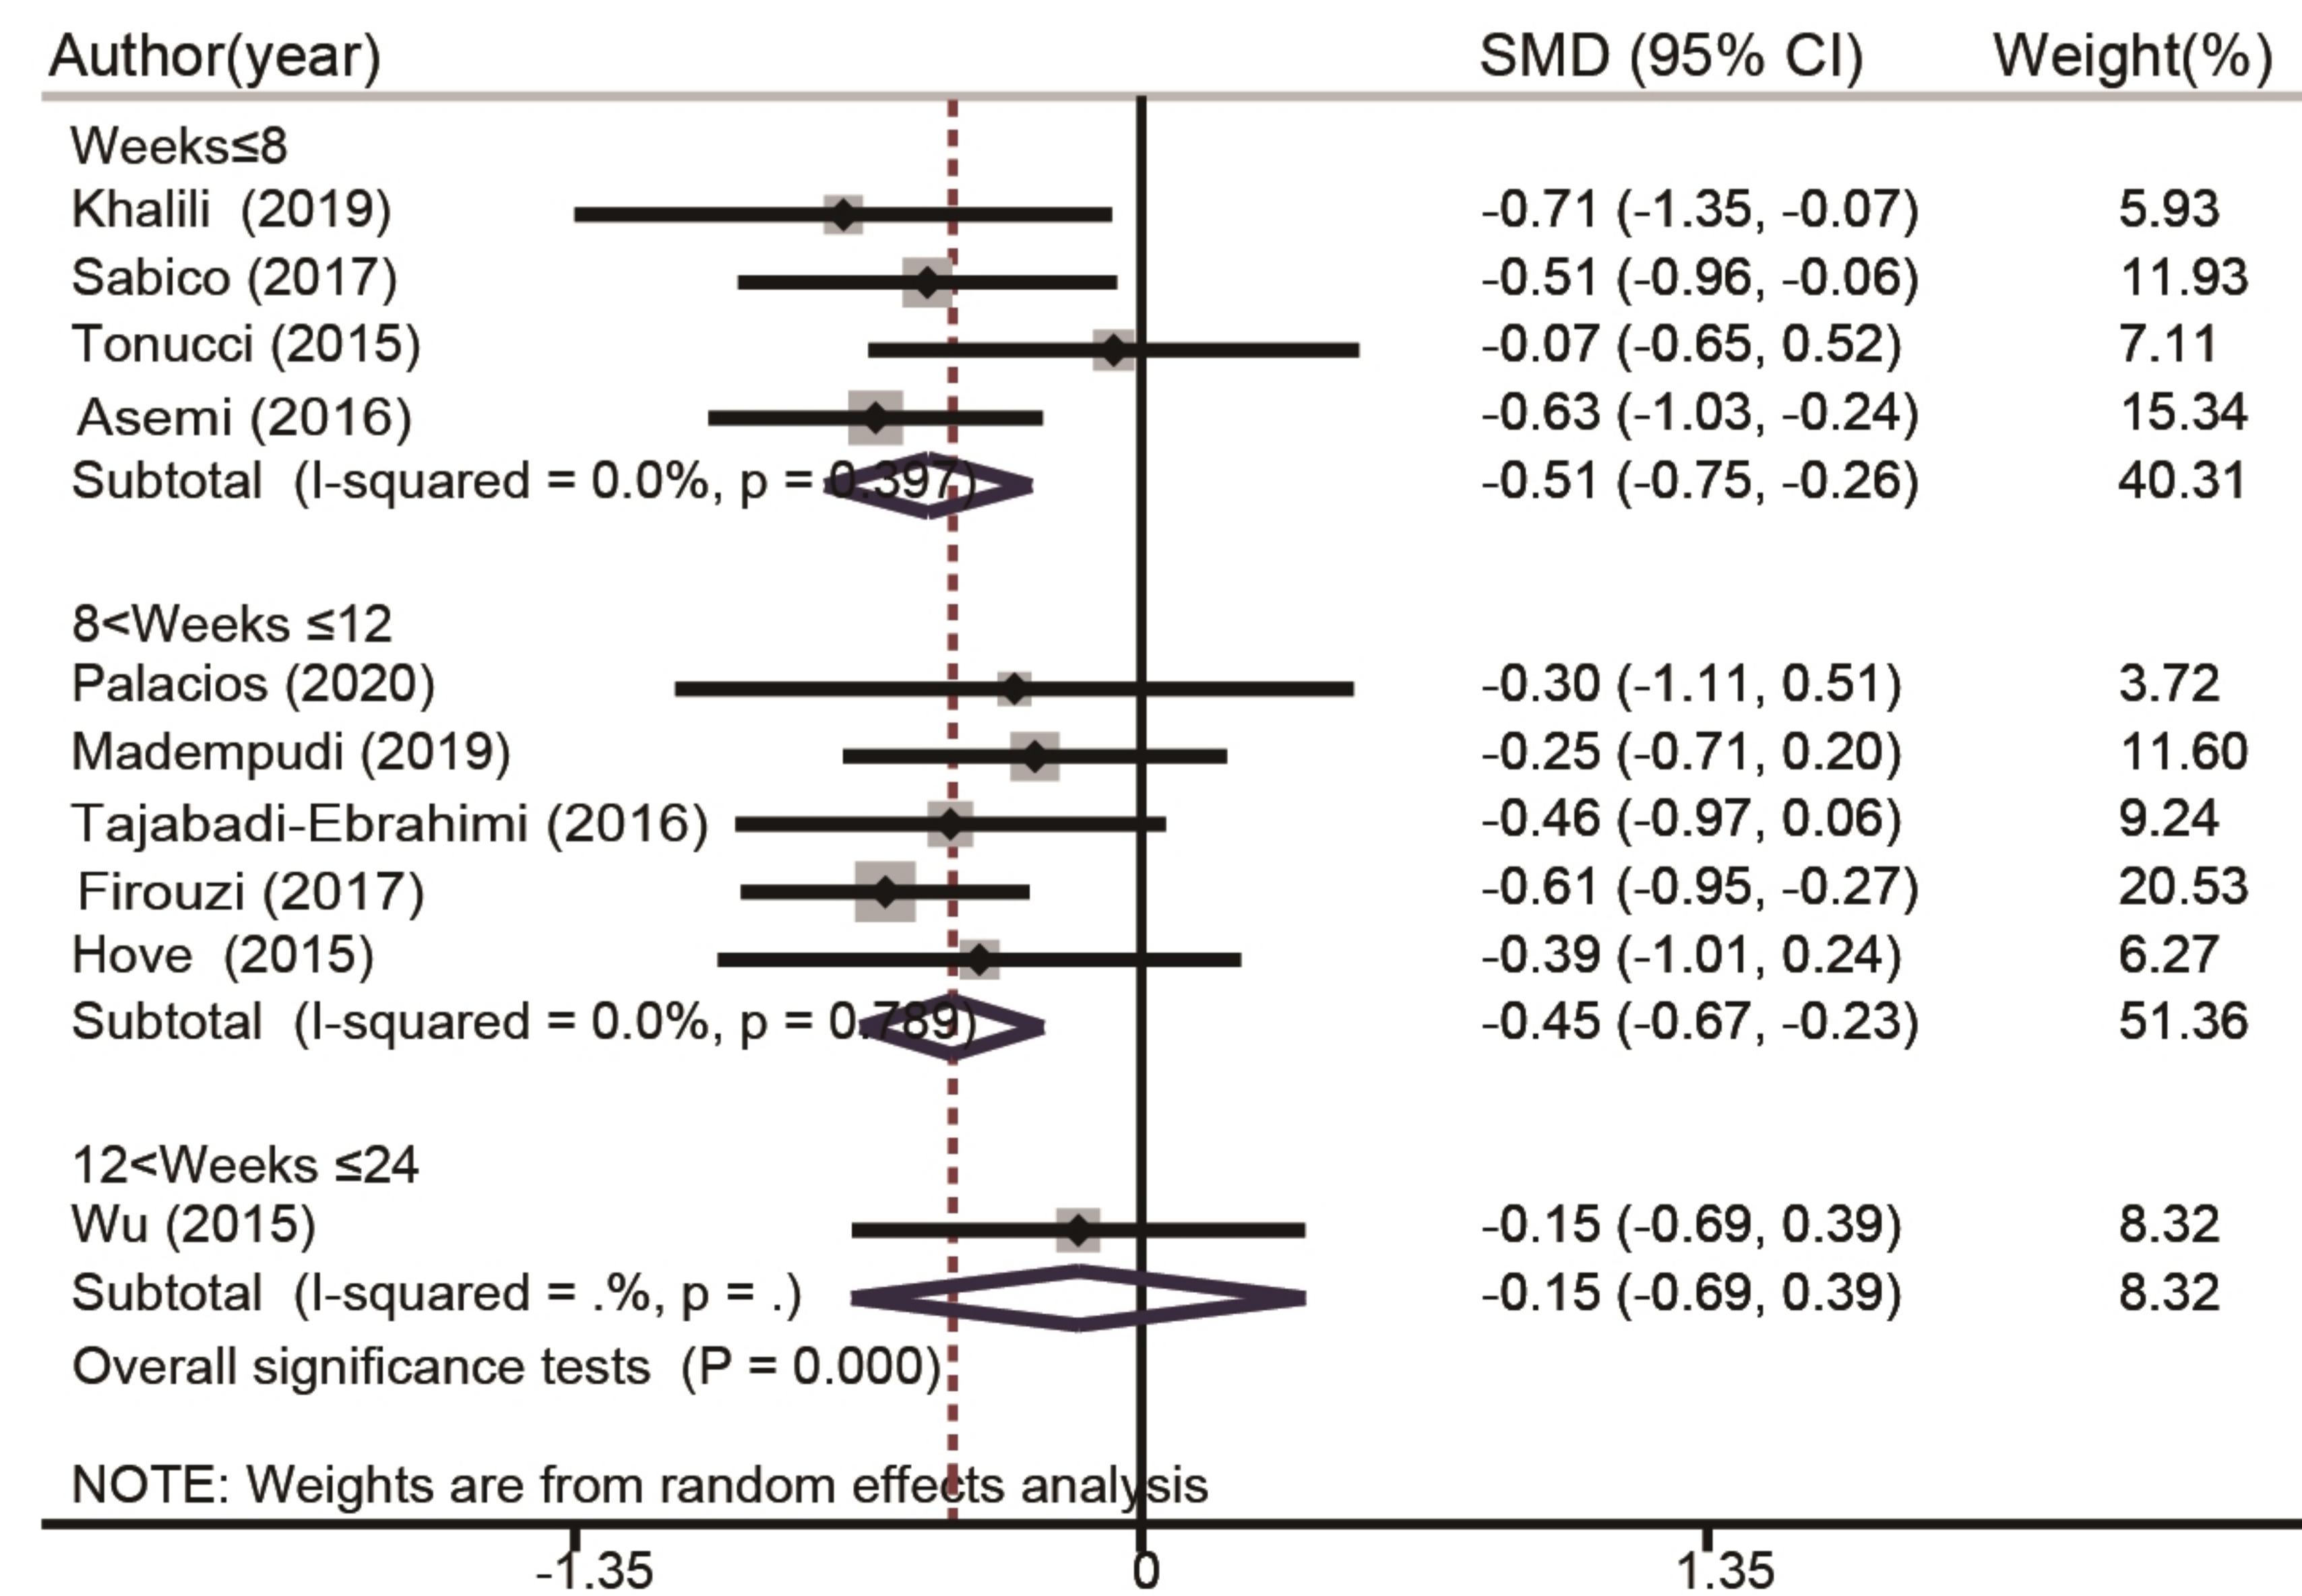

A

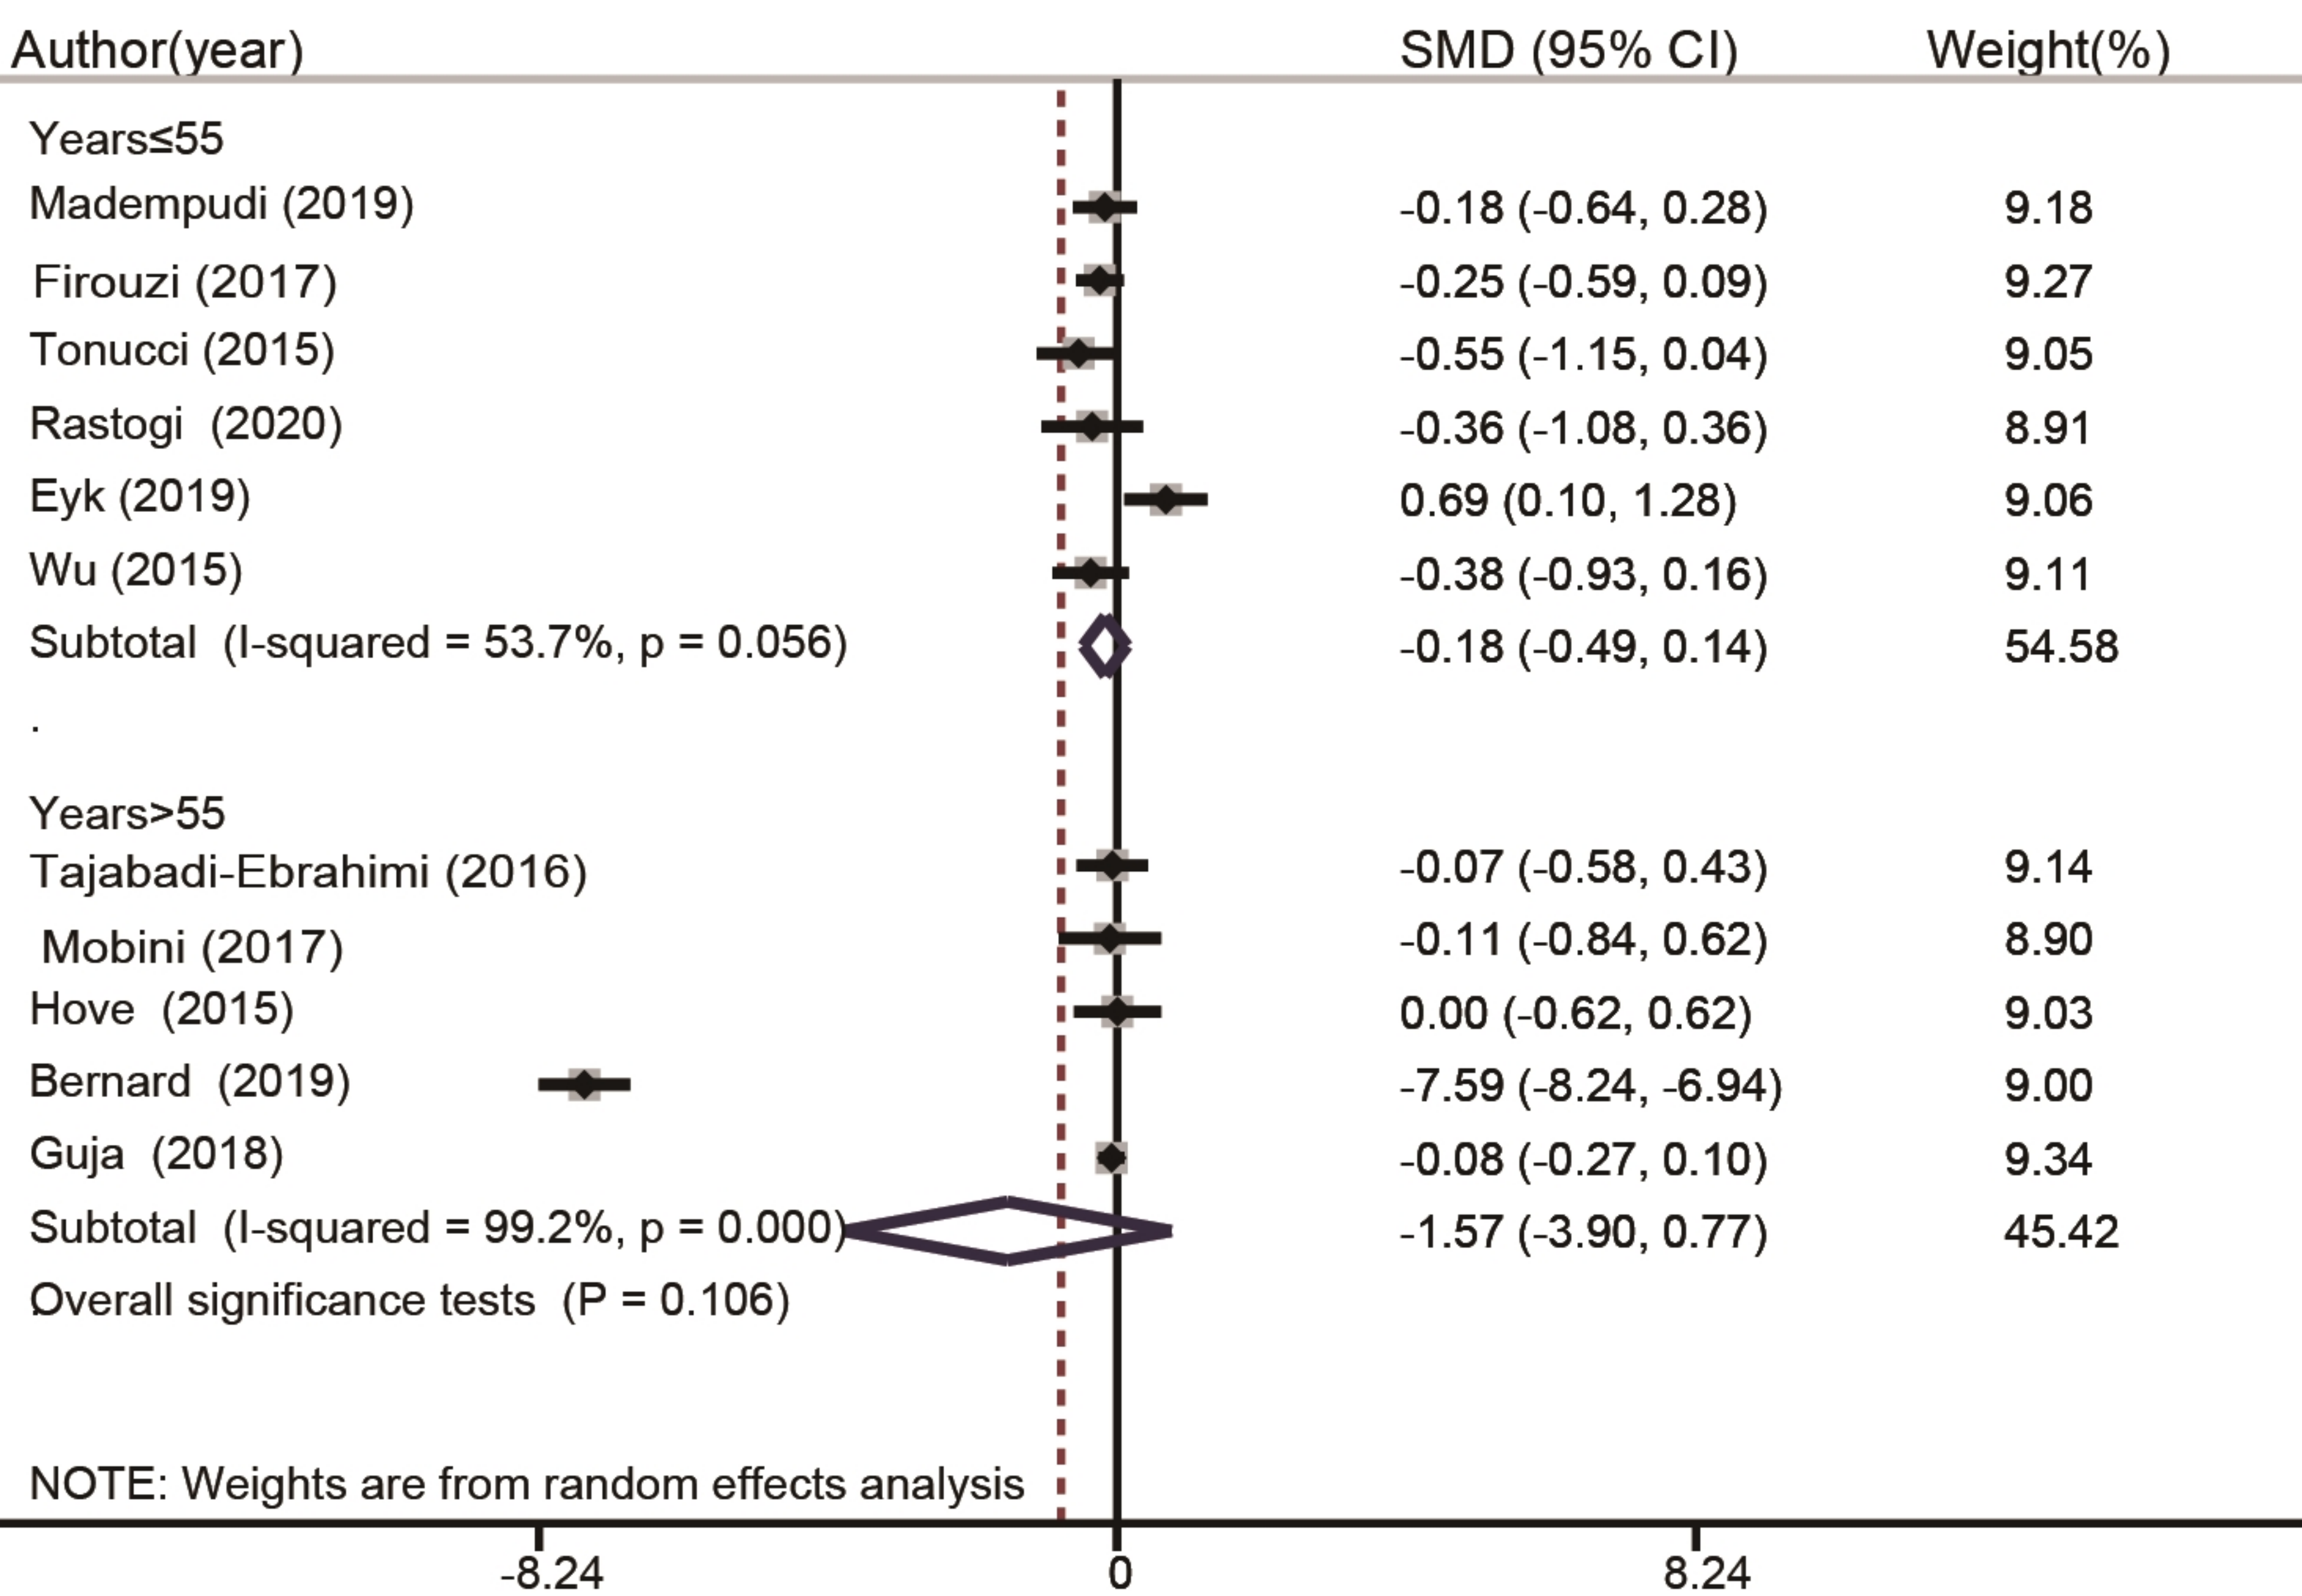

B

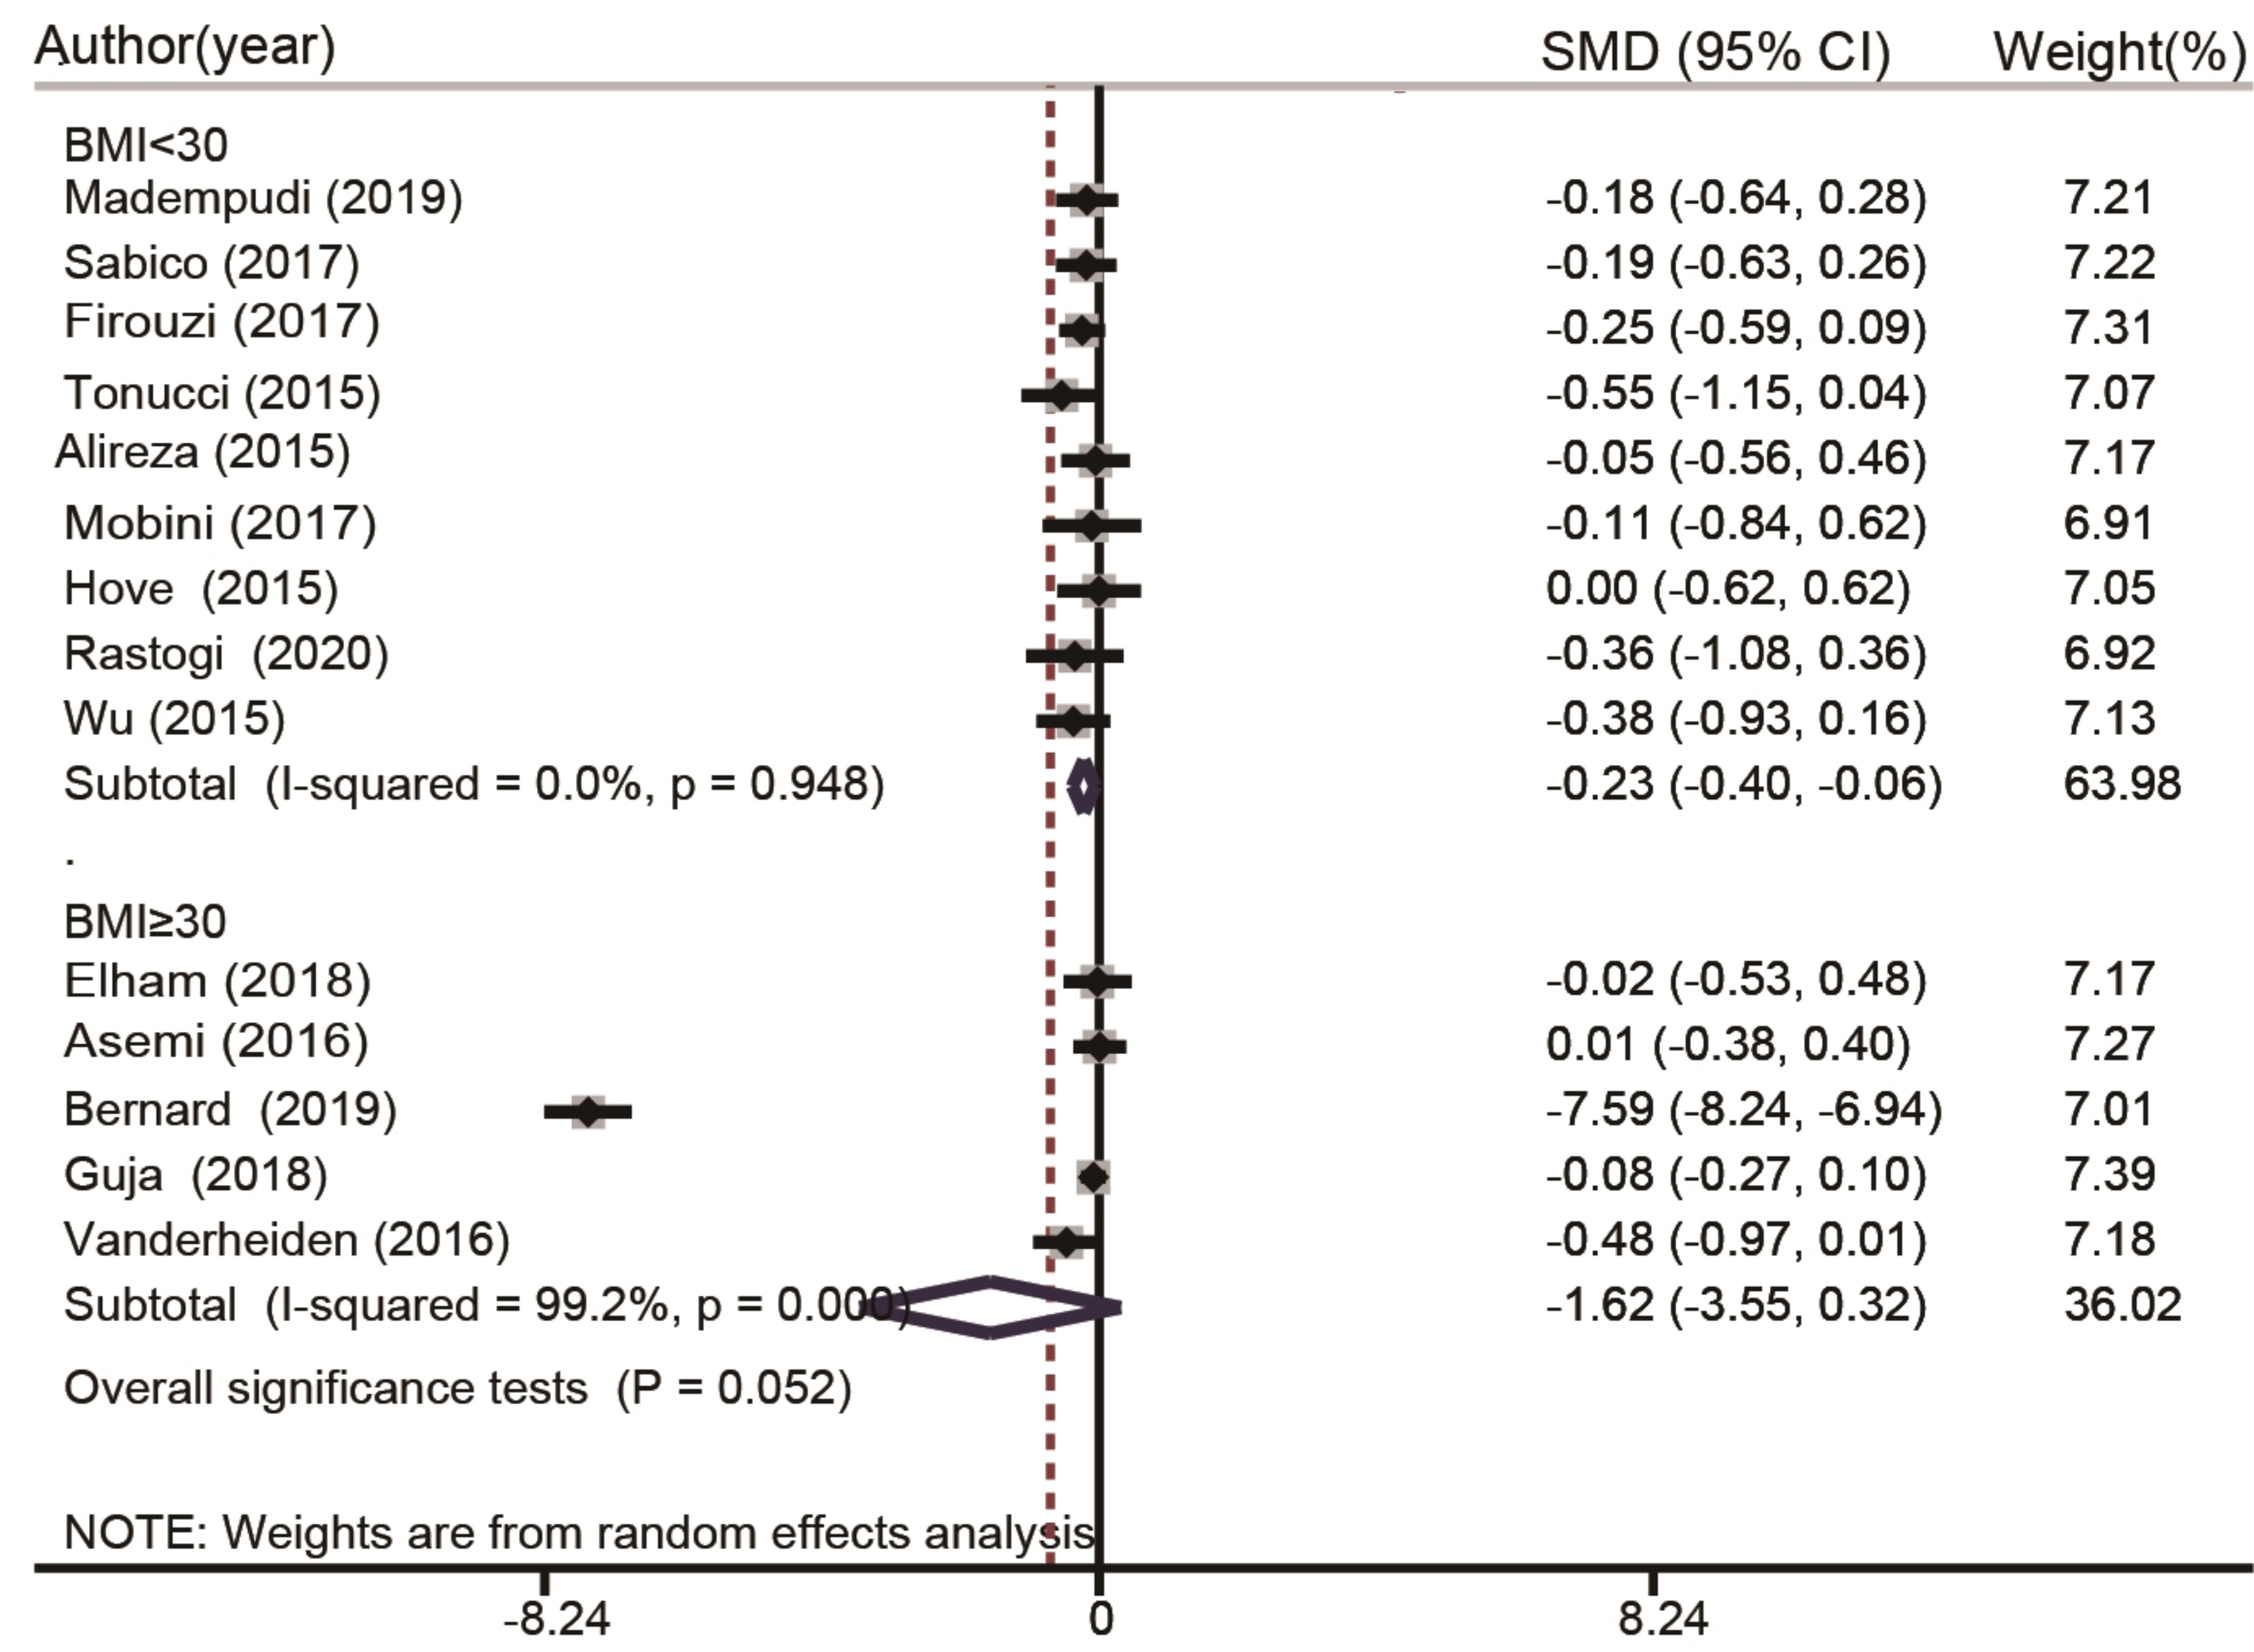

C

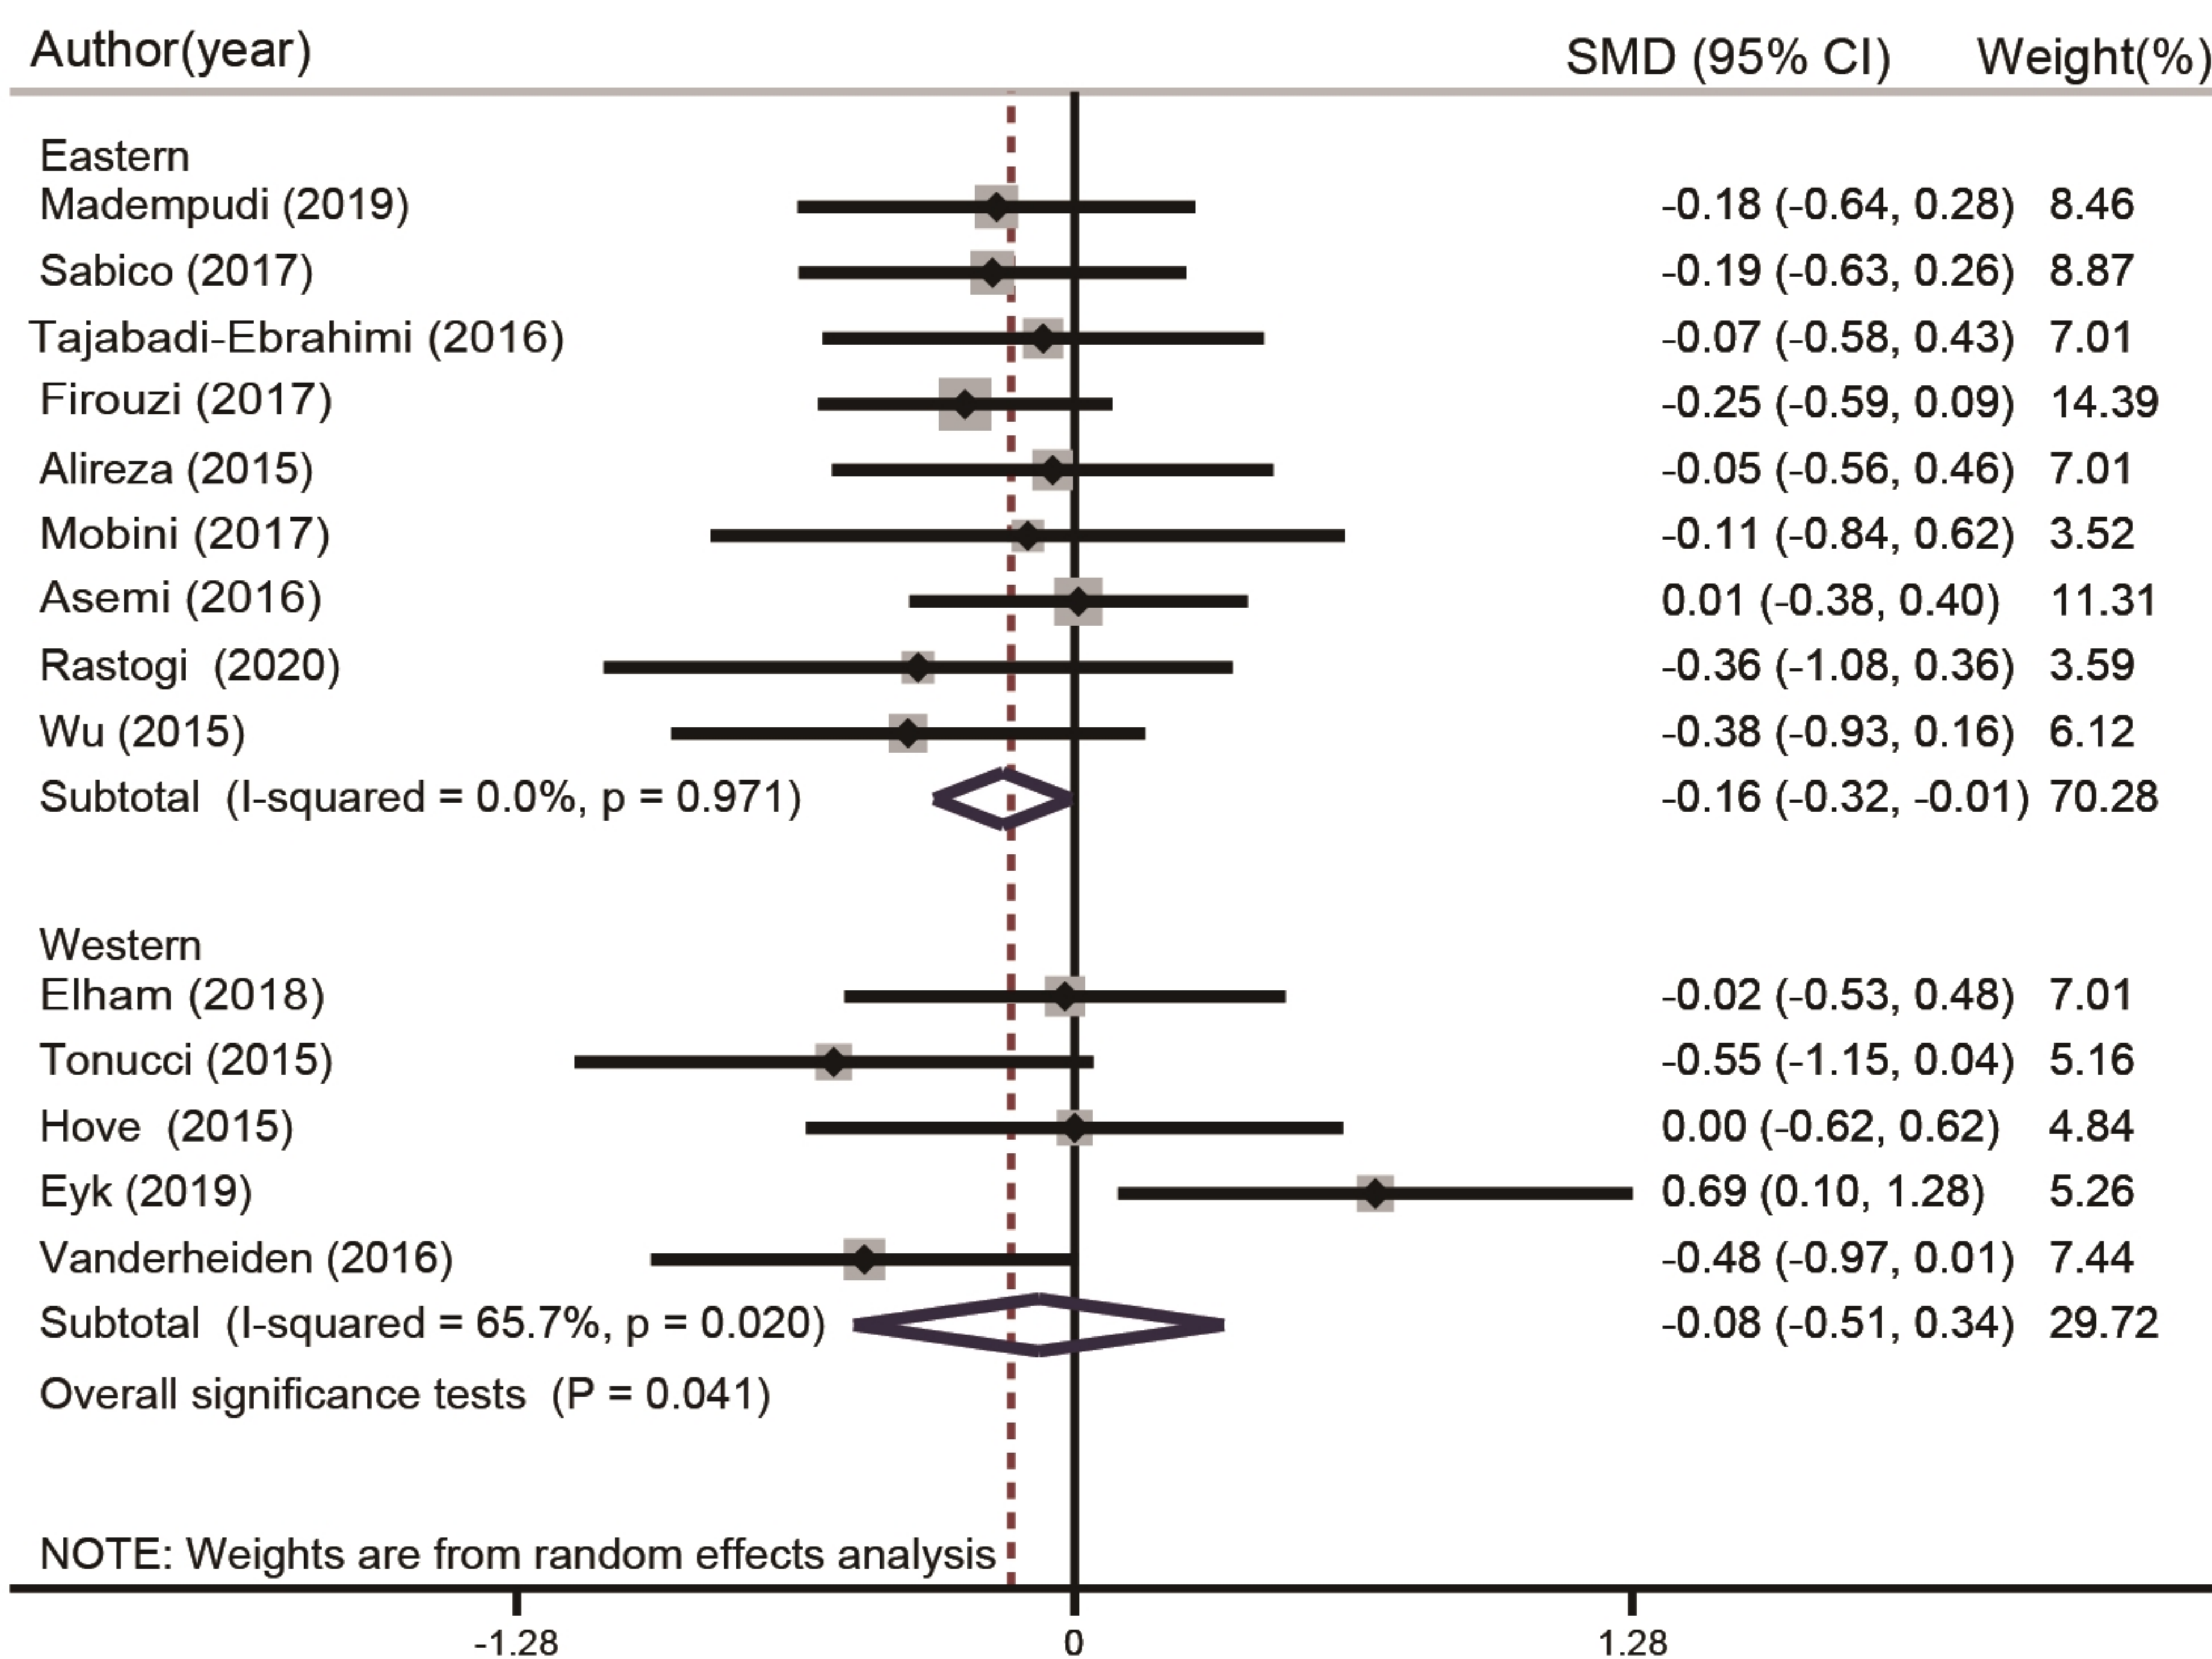

D

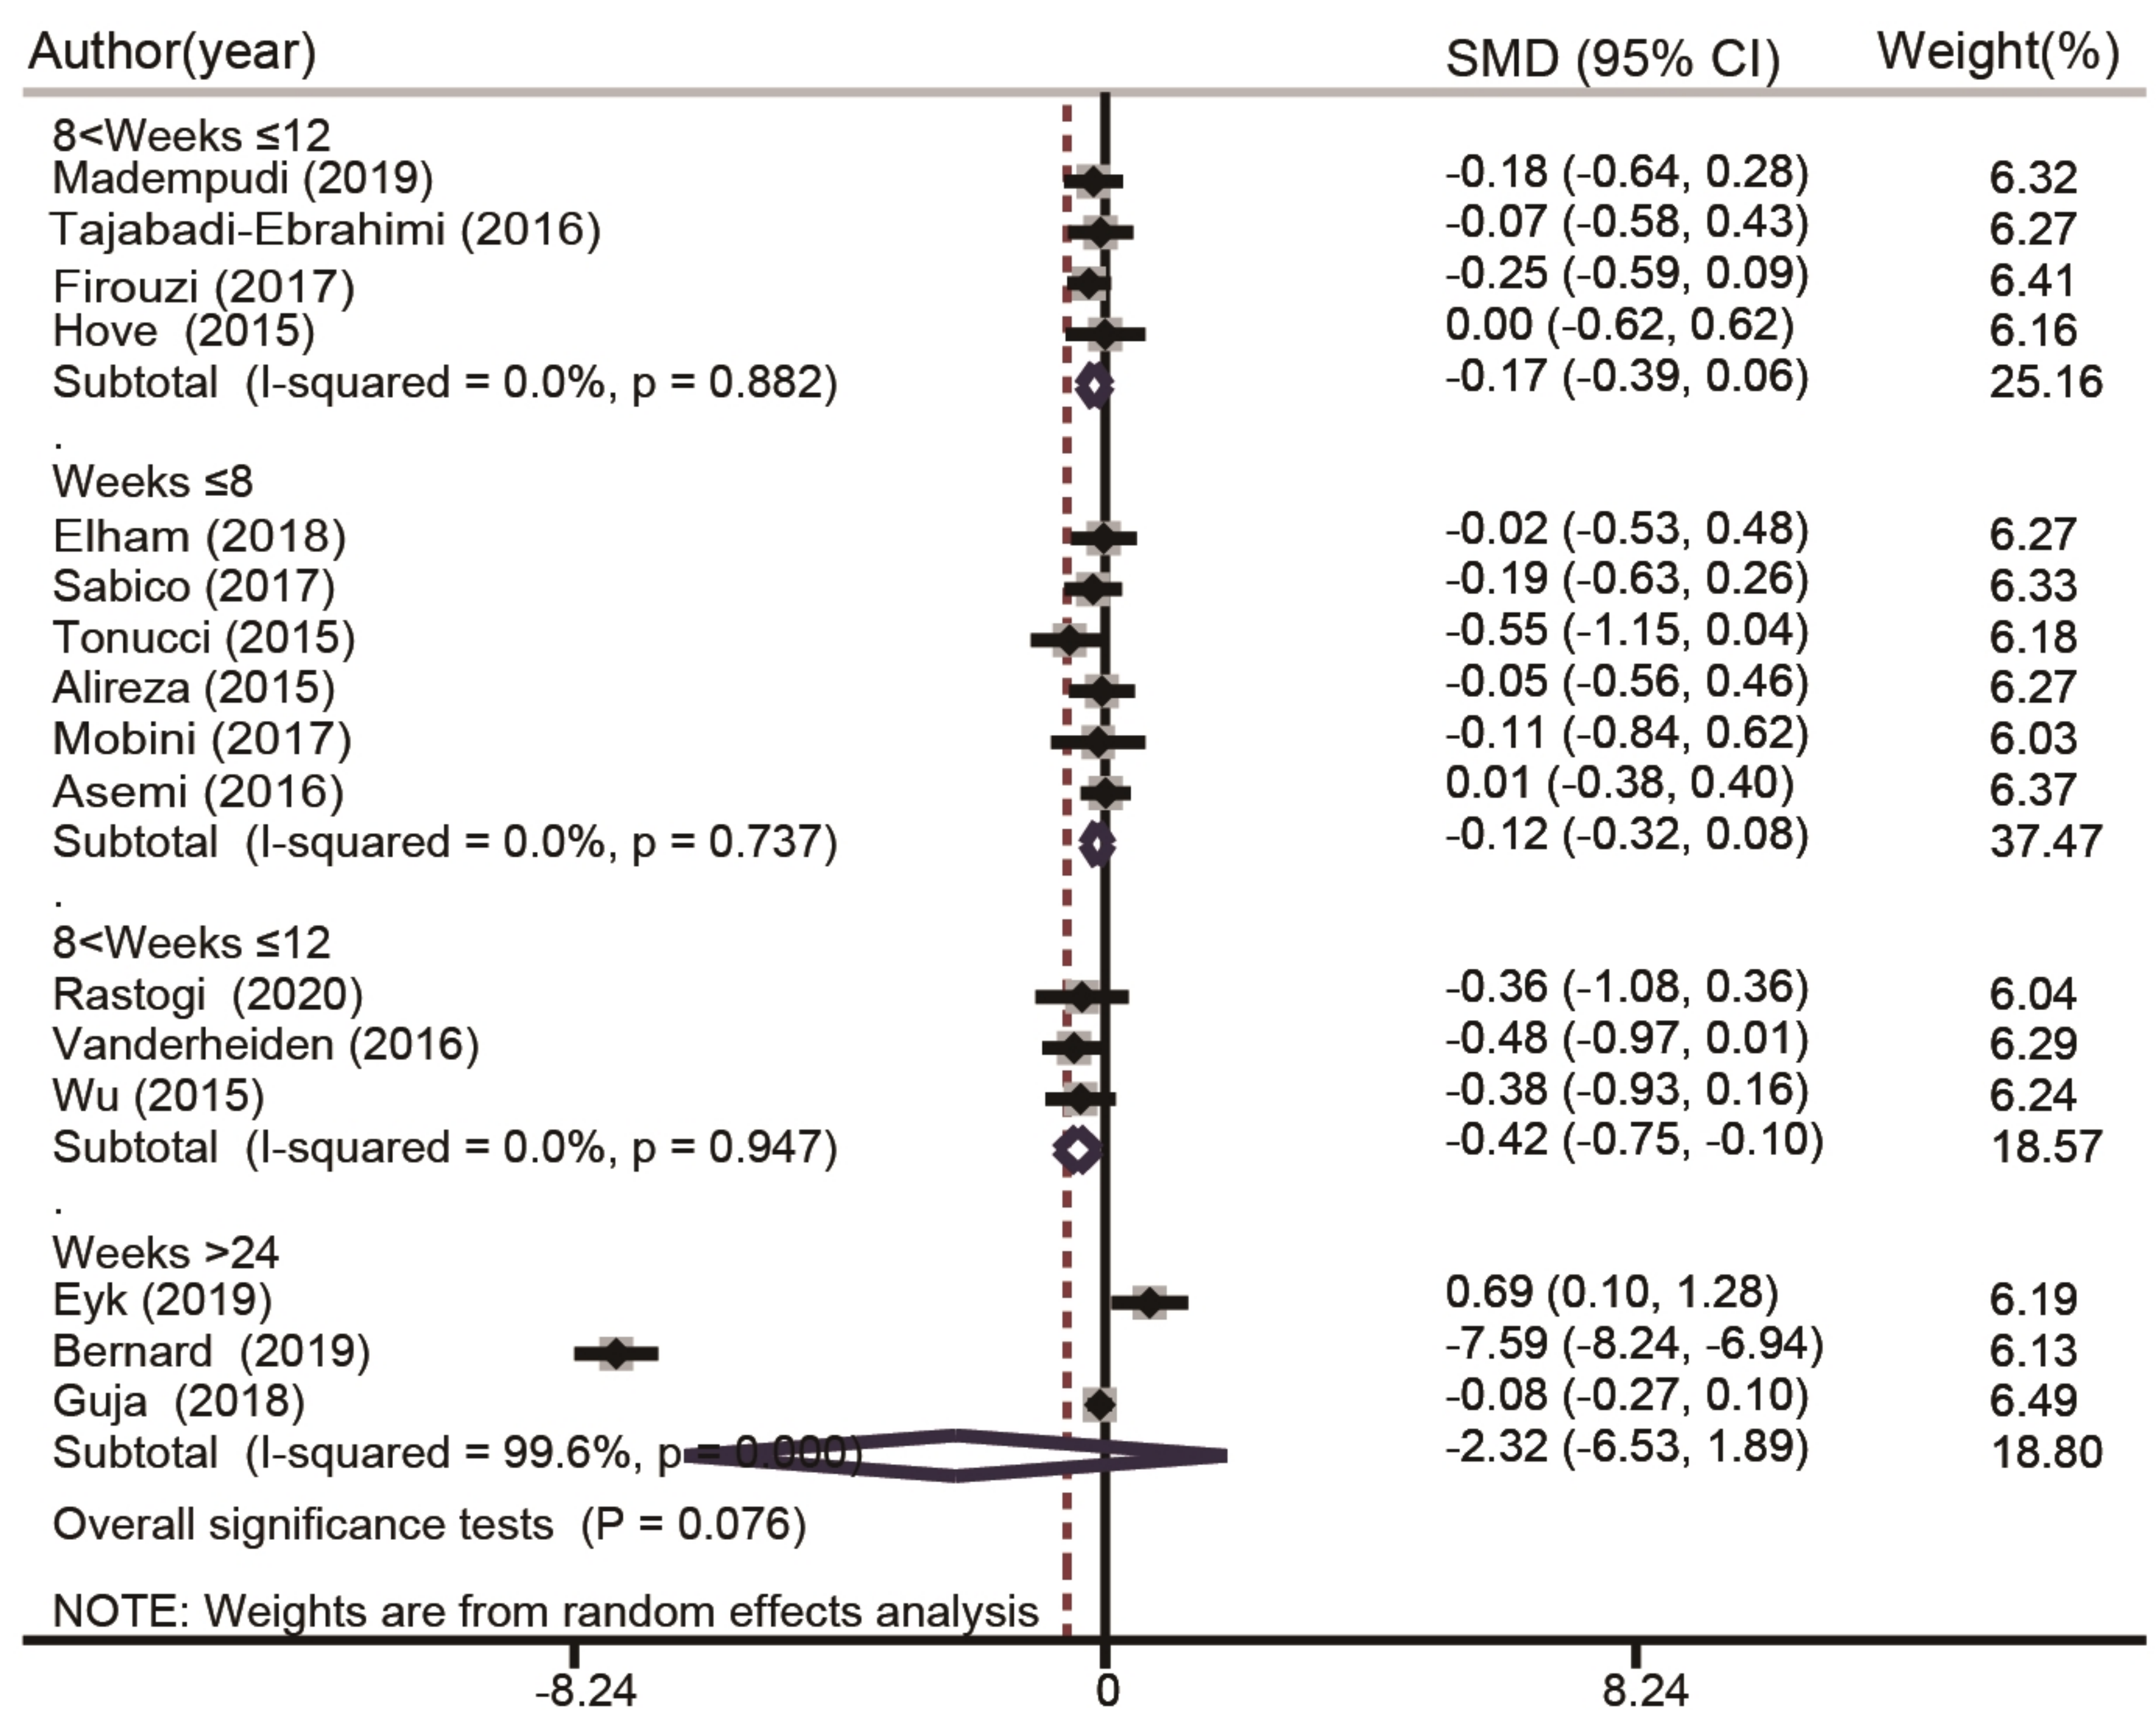

A

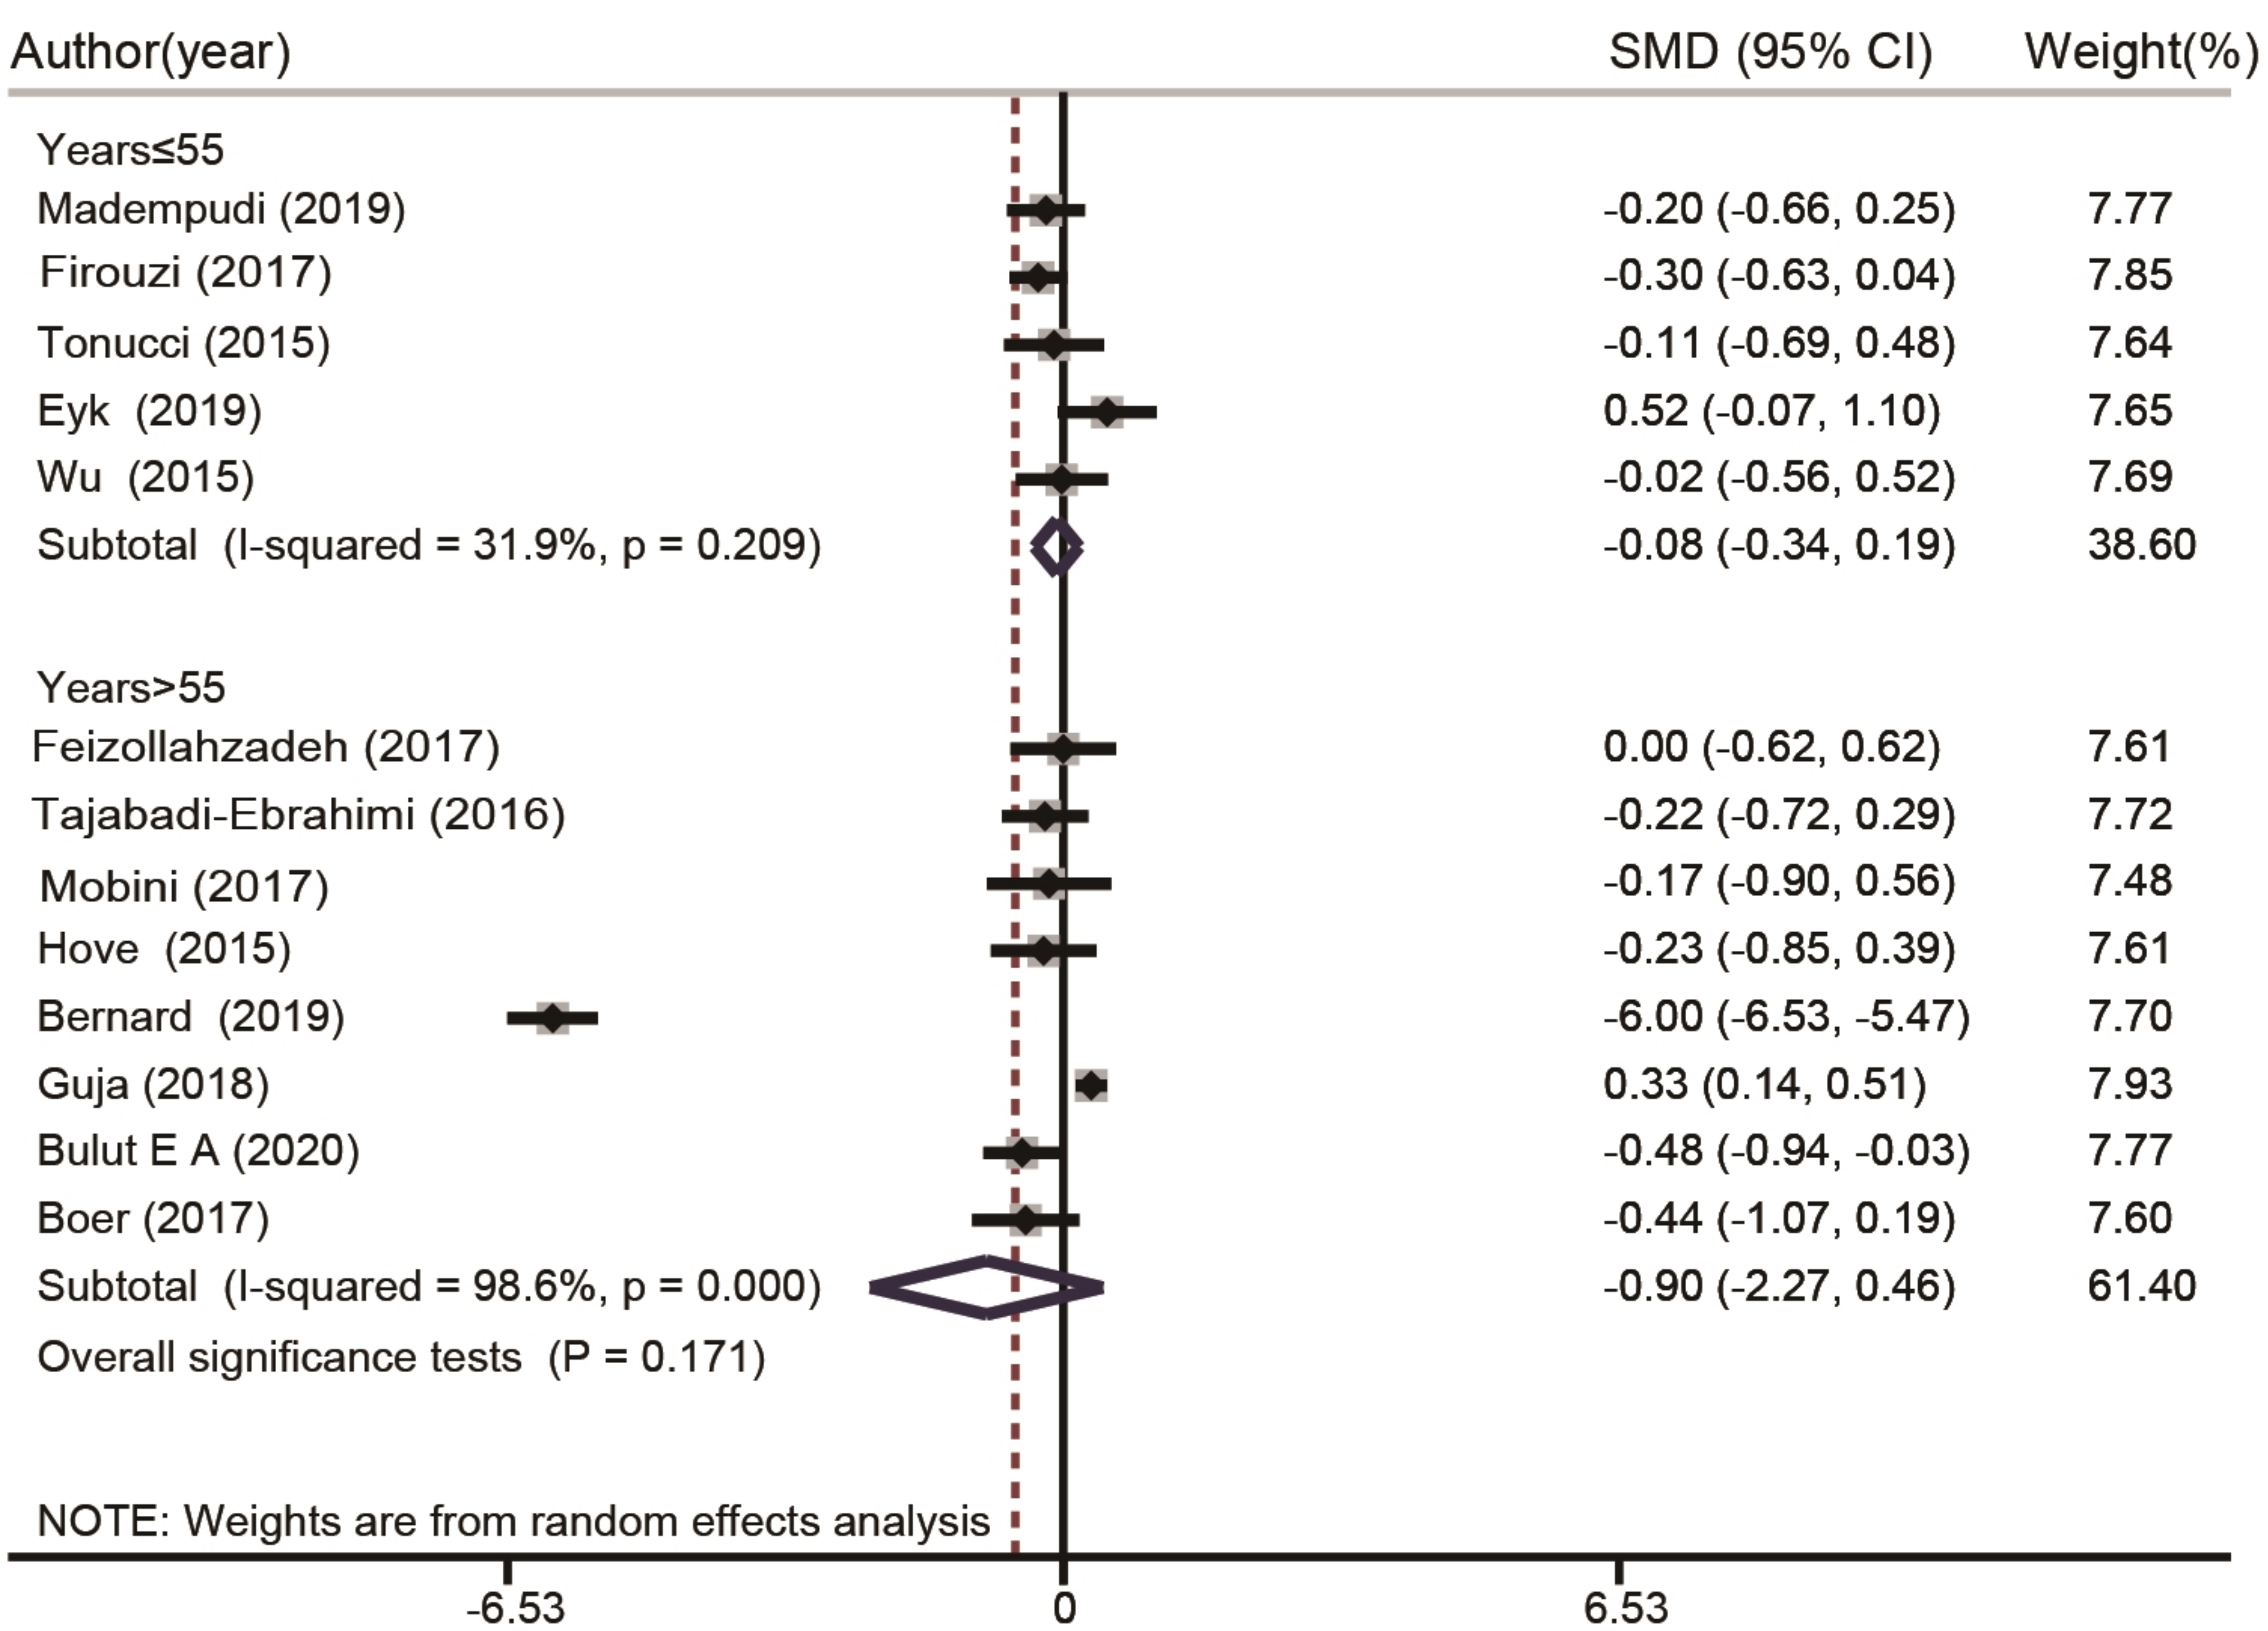

B

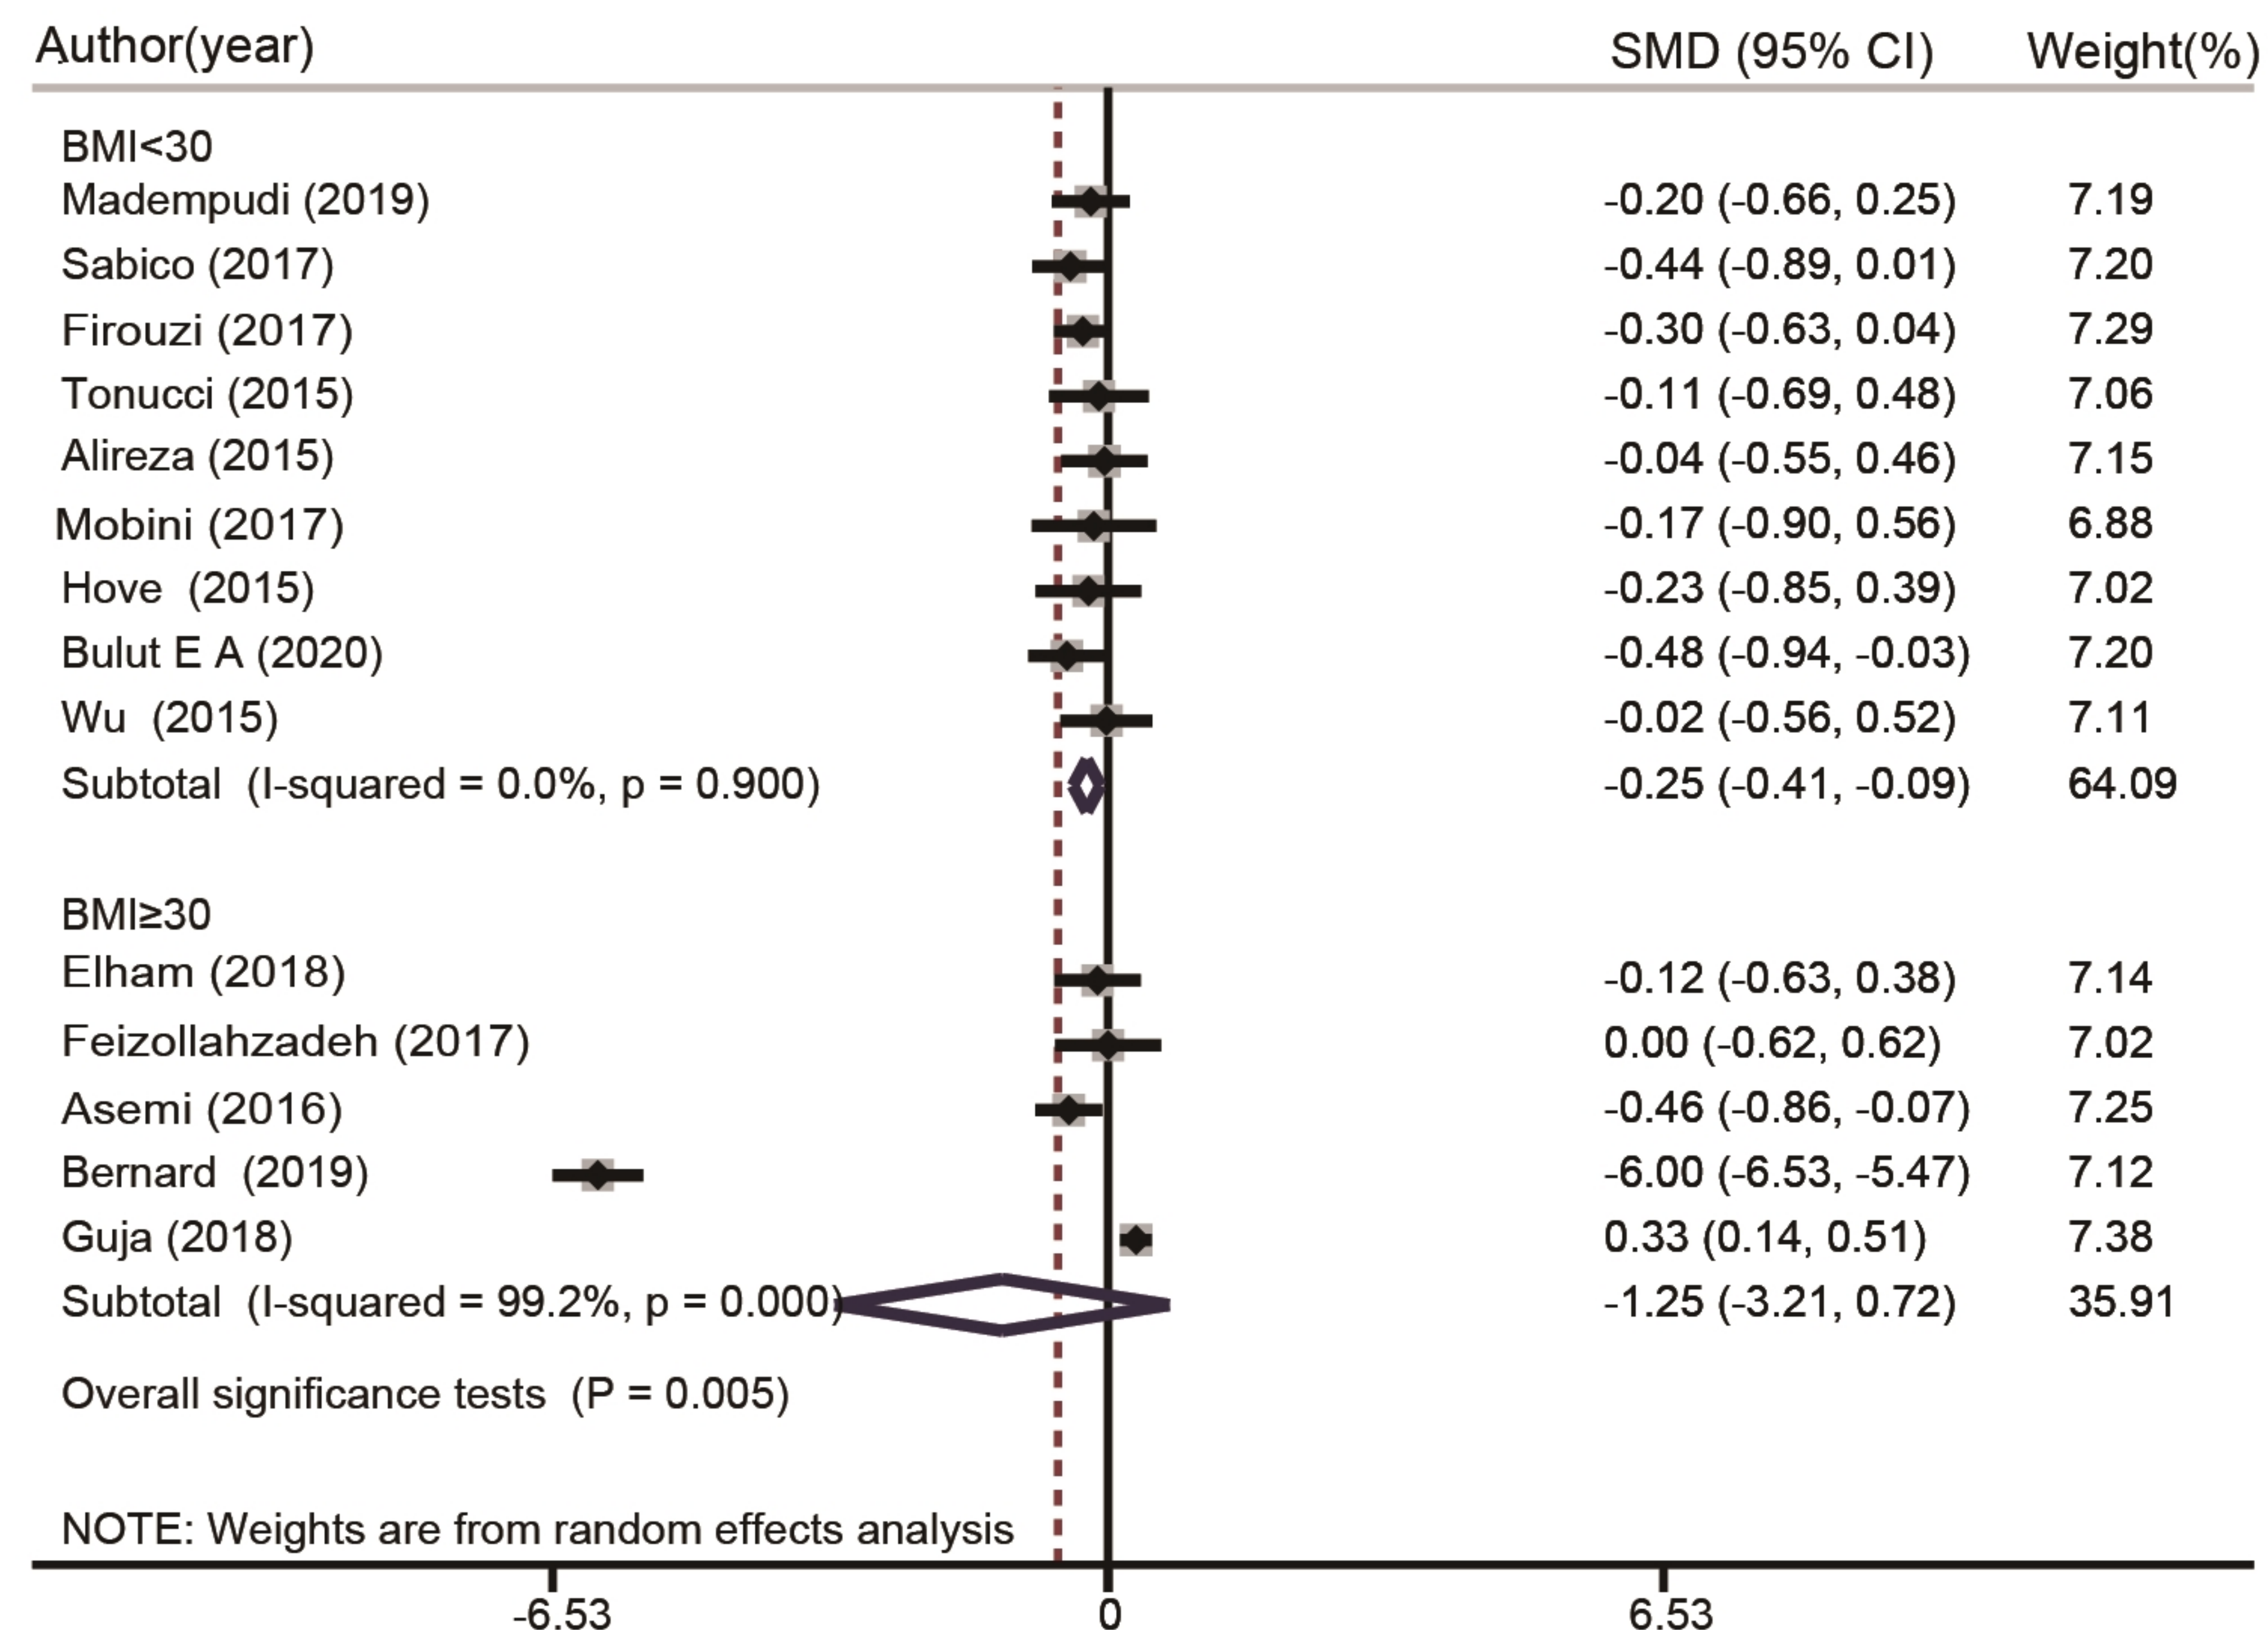

C

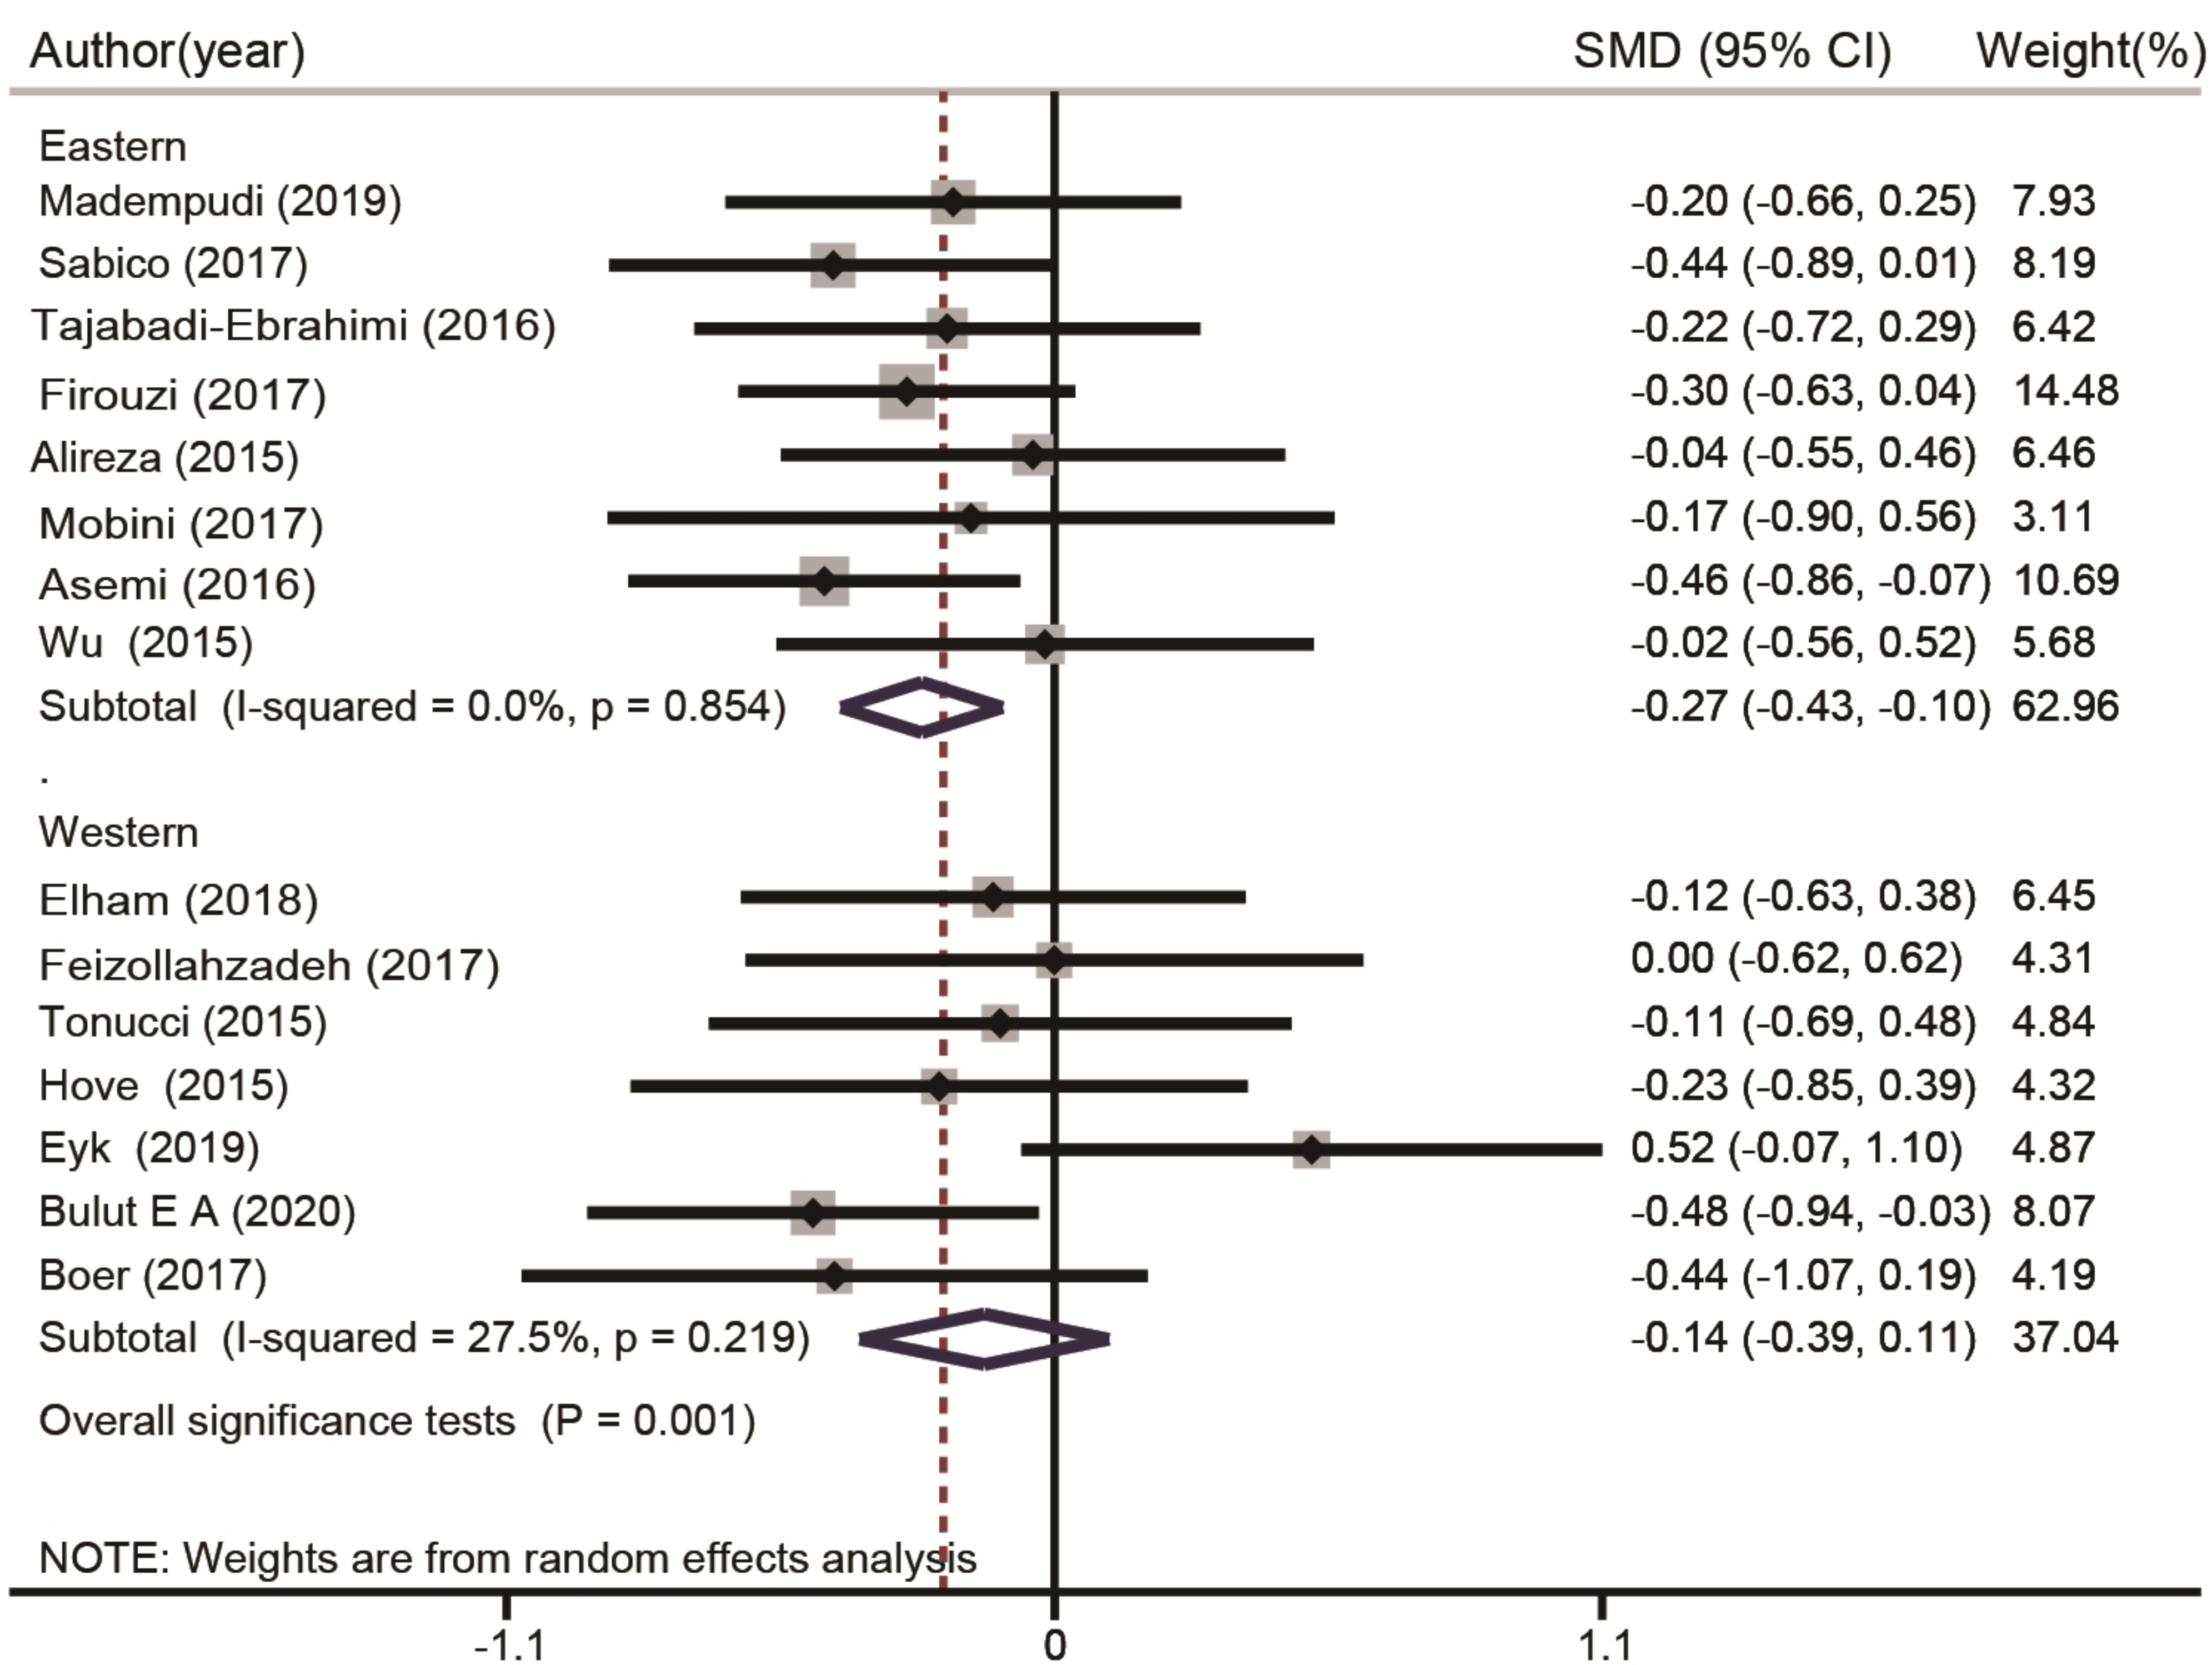

D

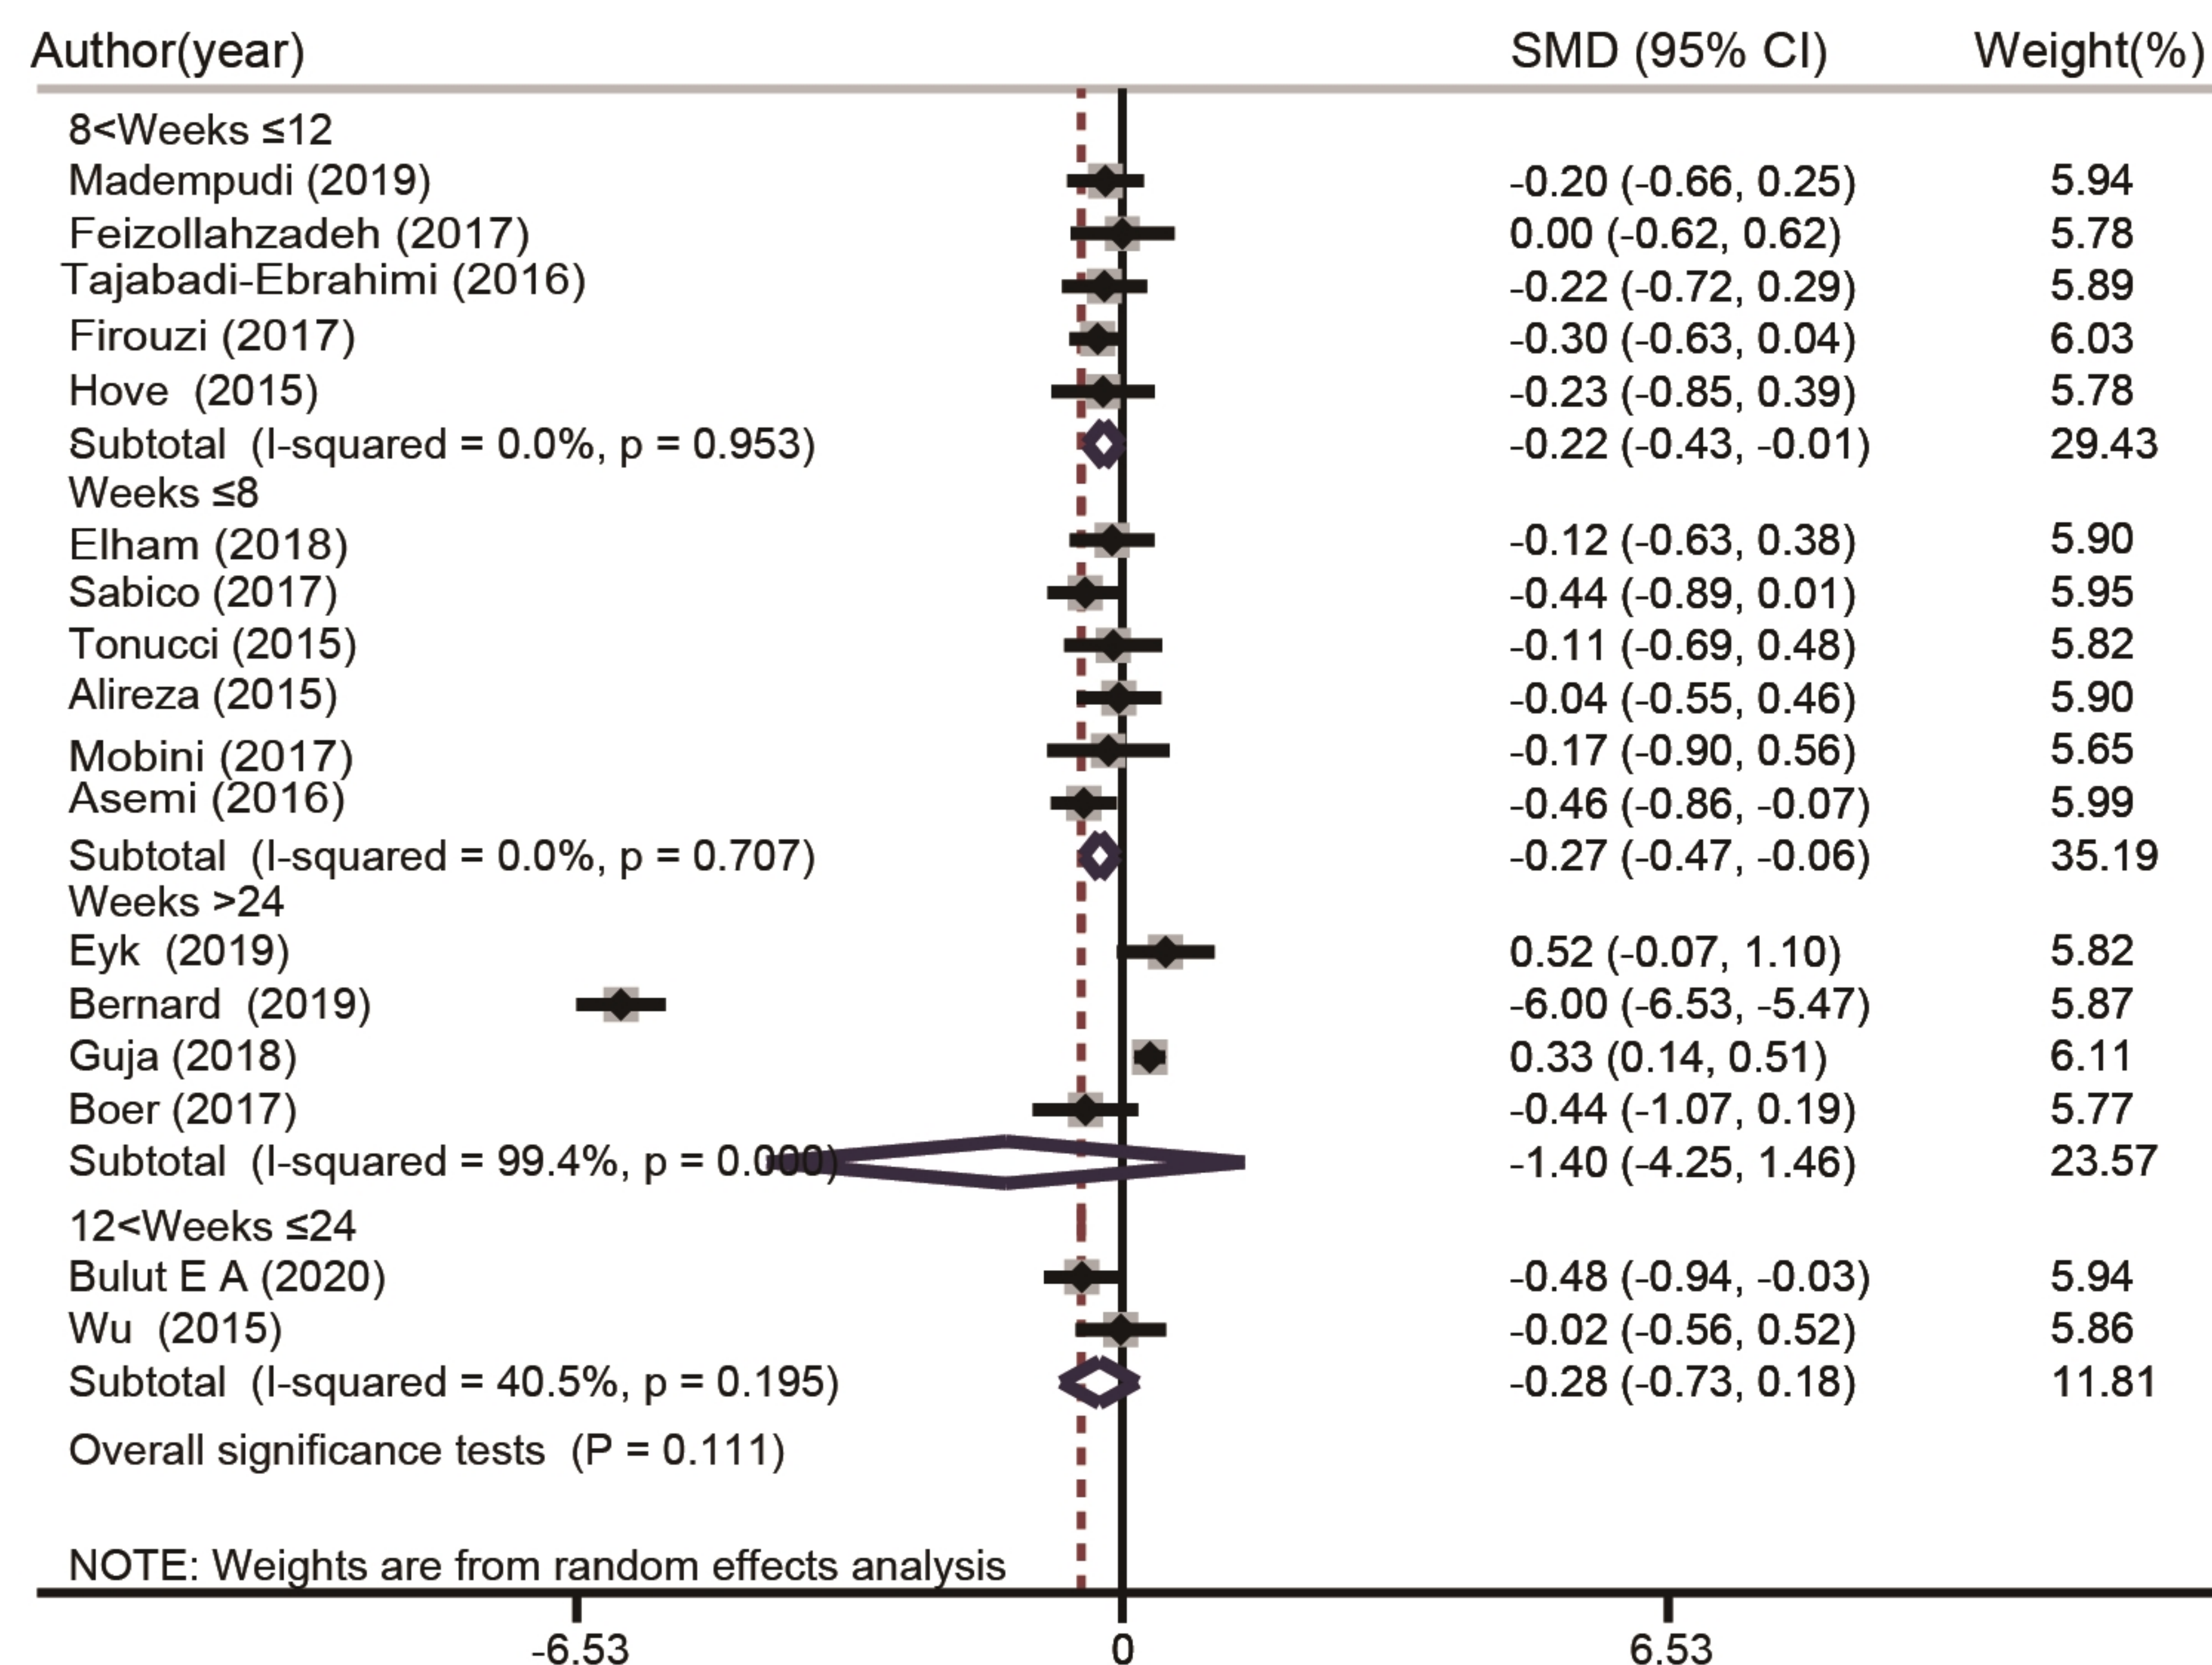

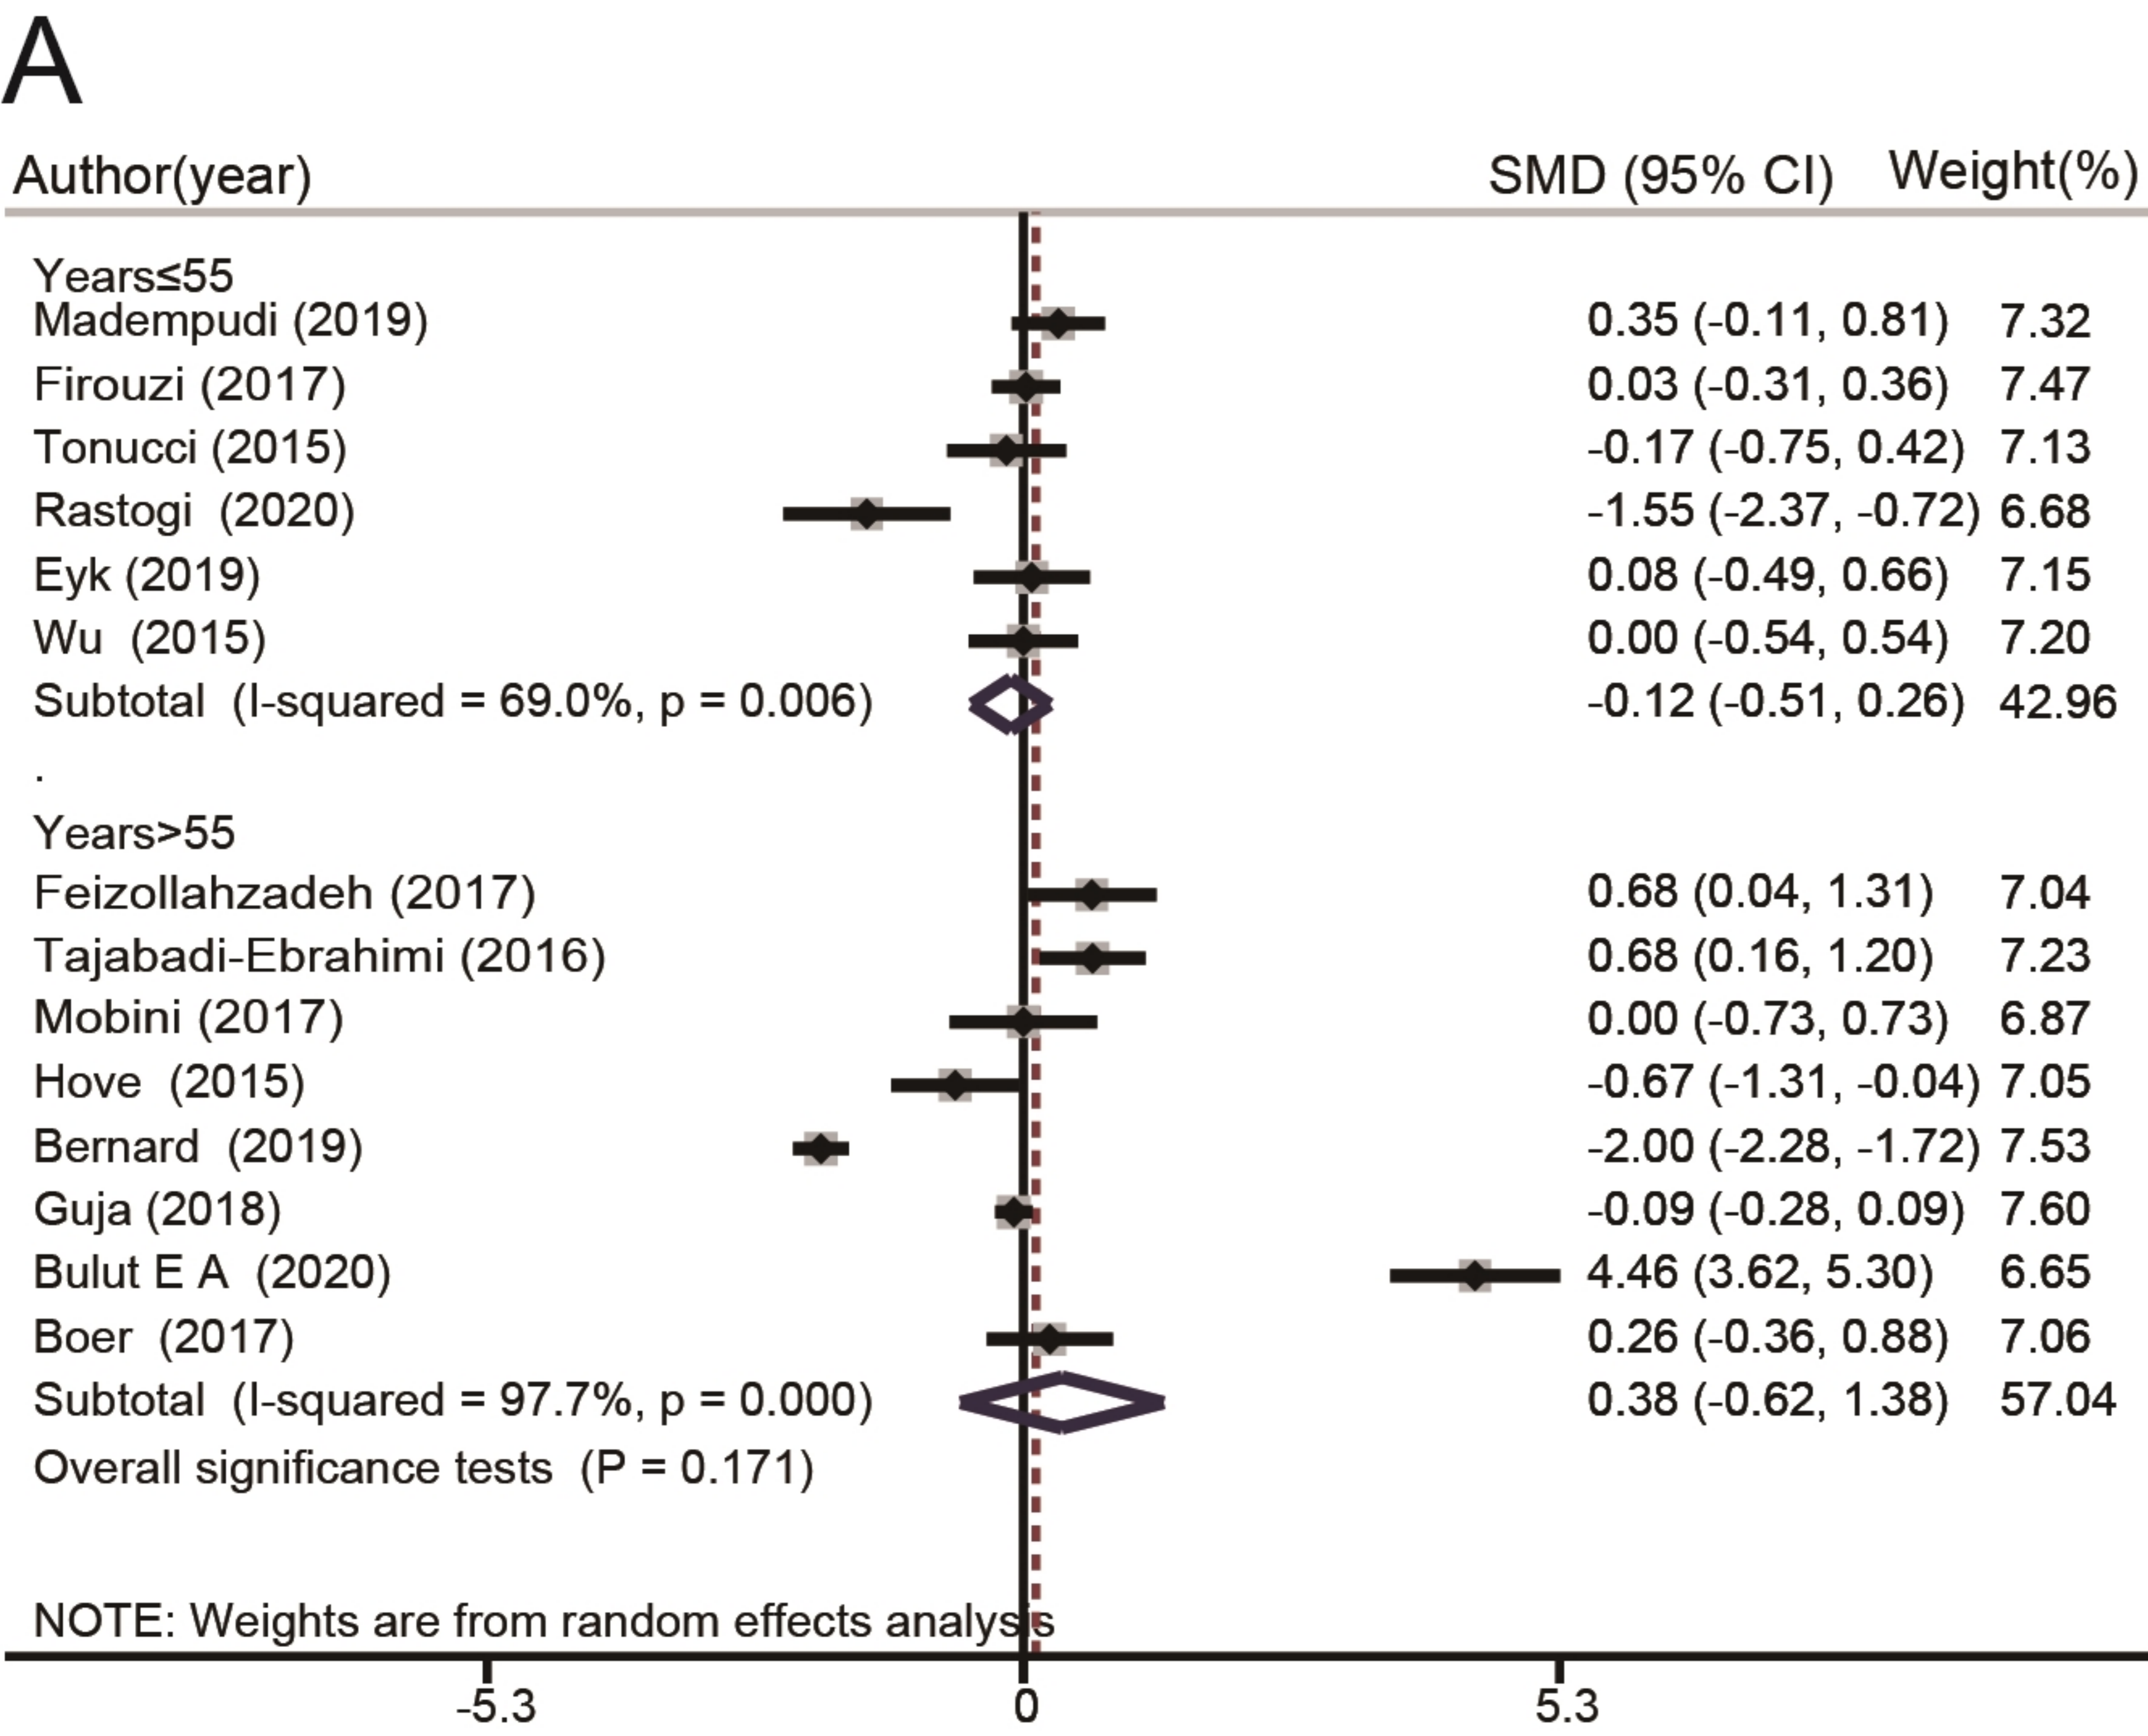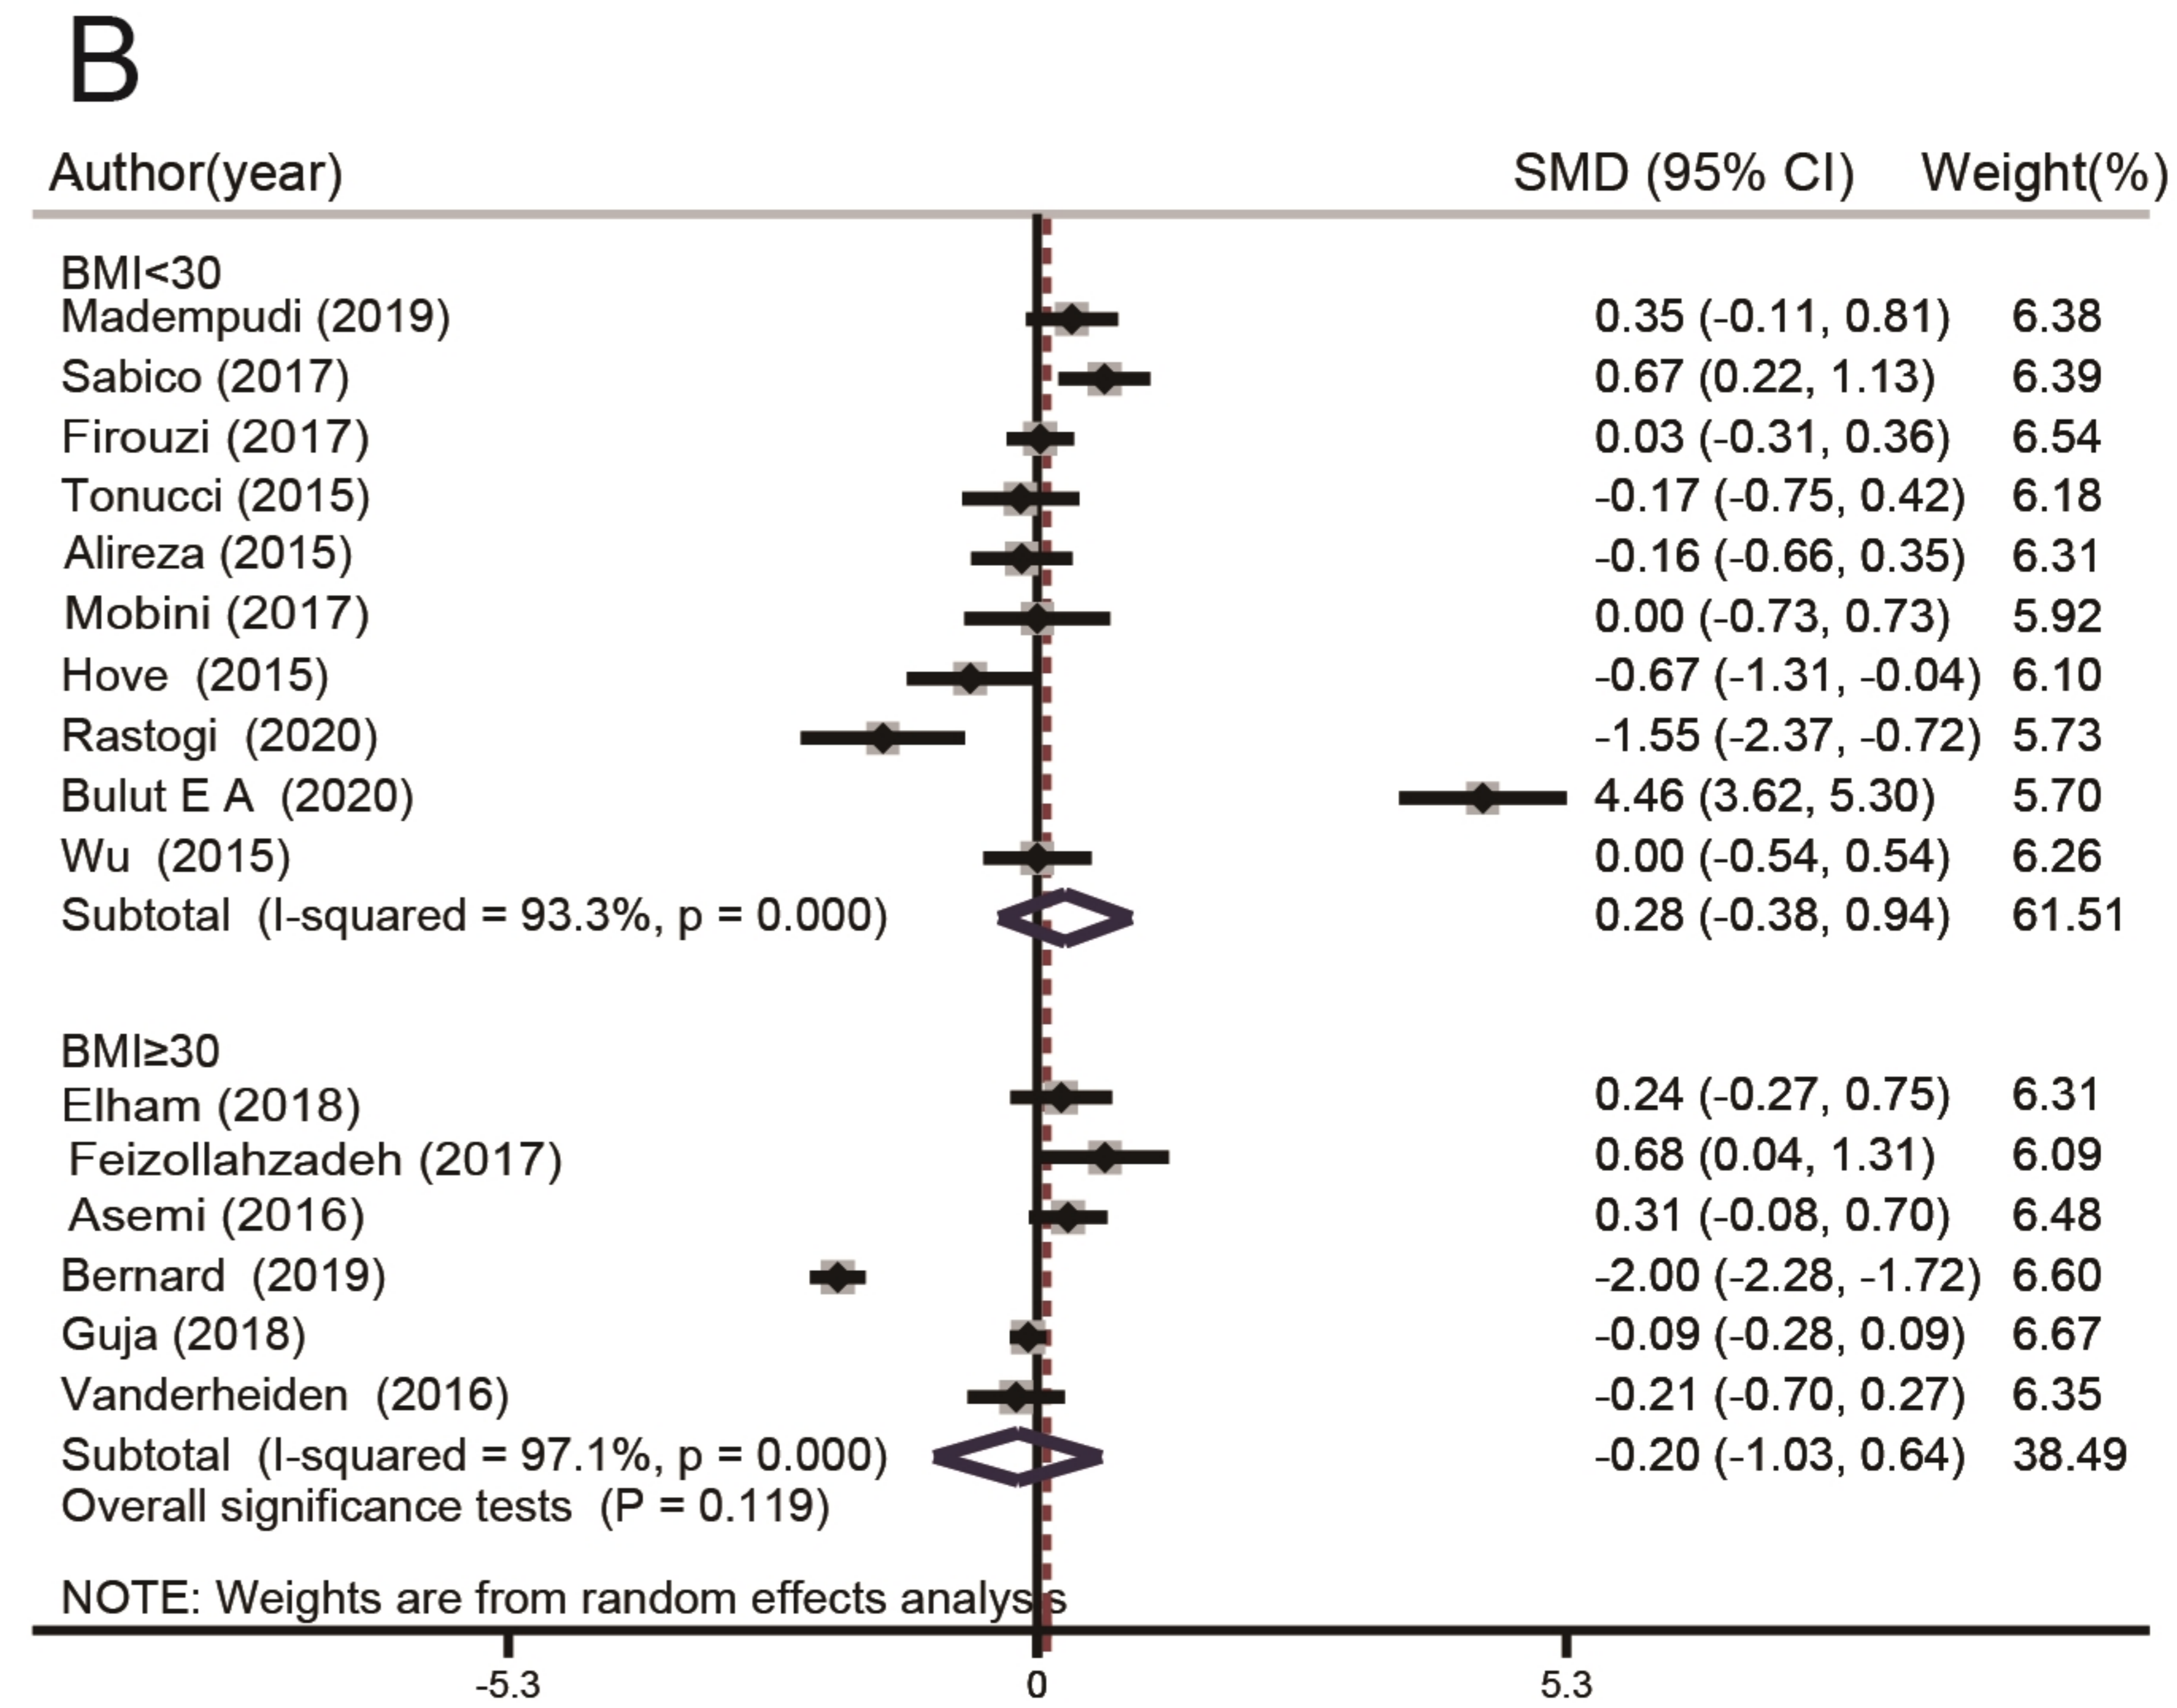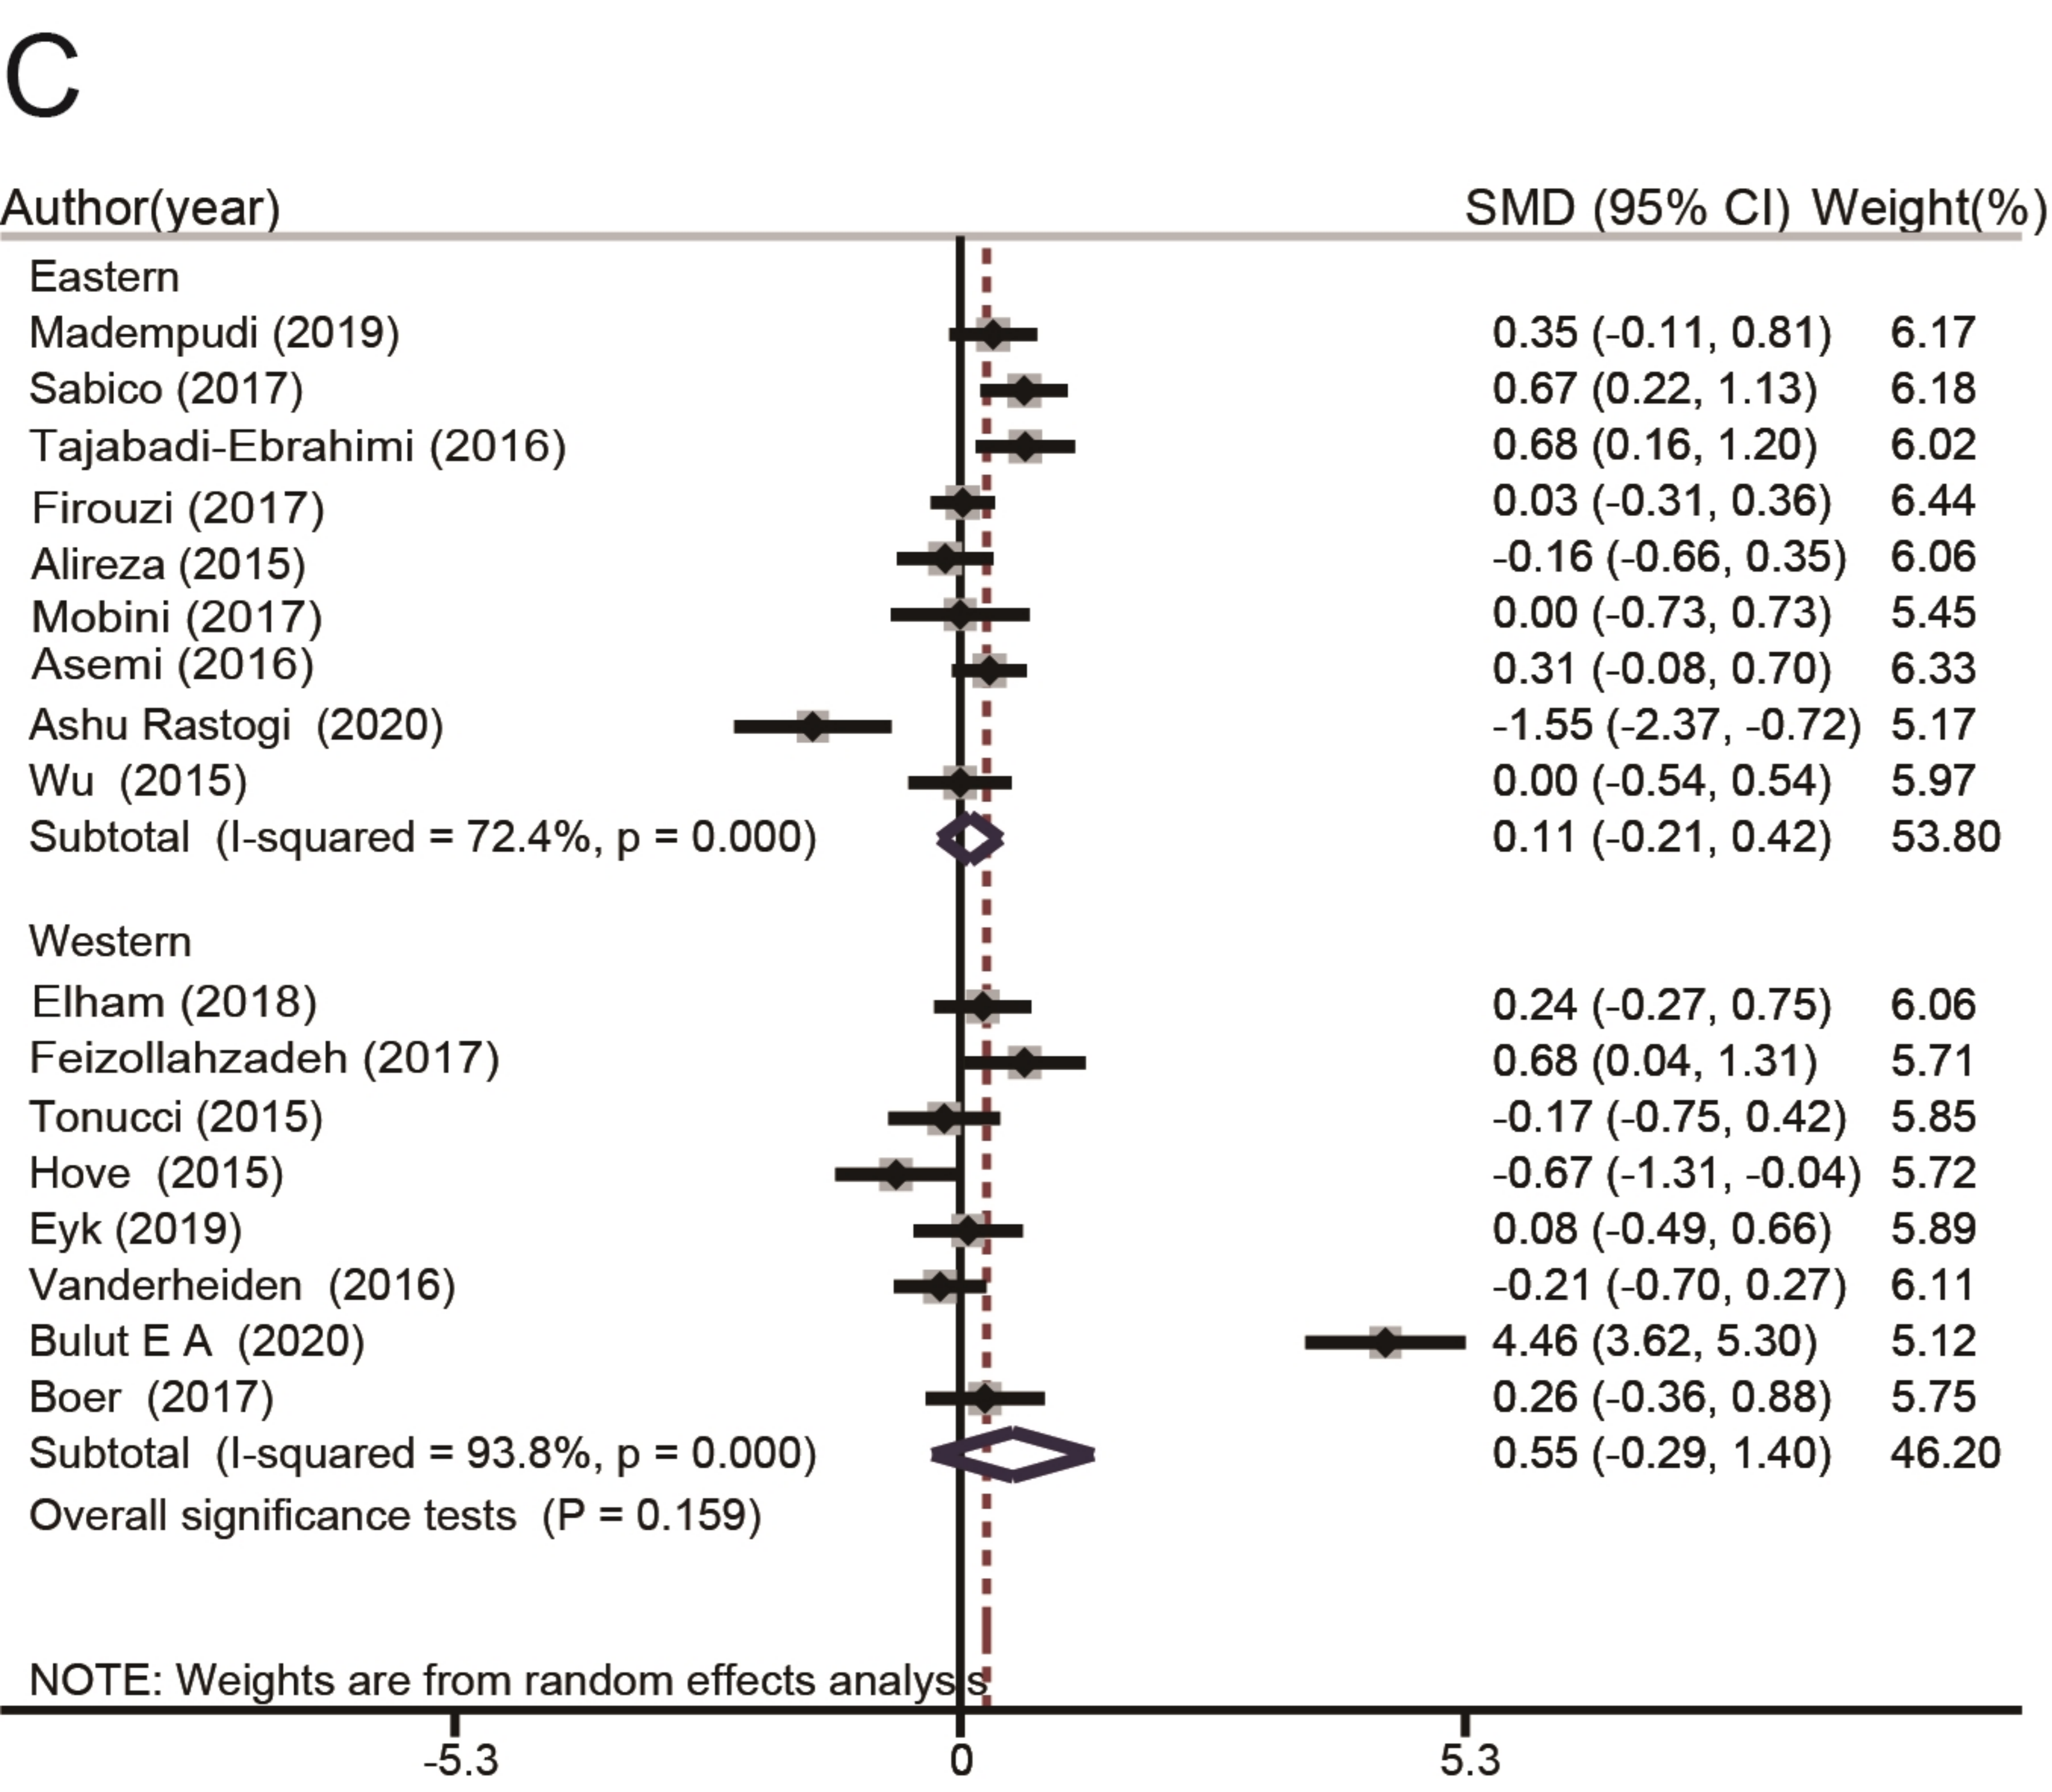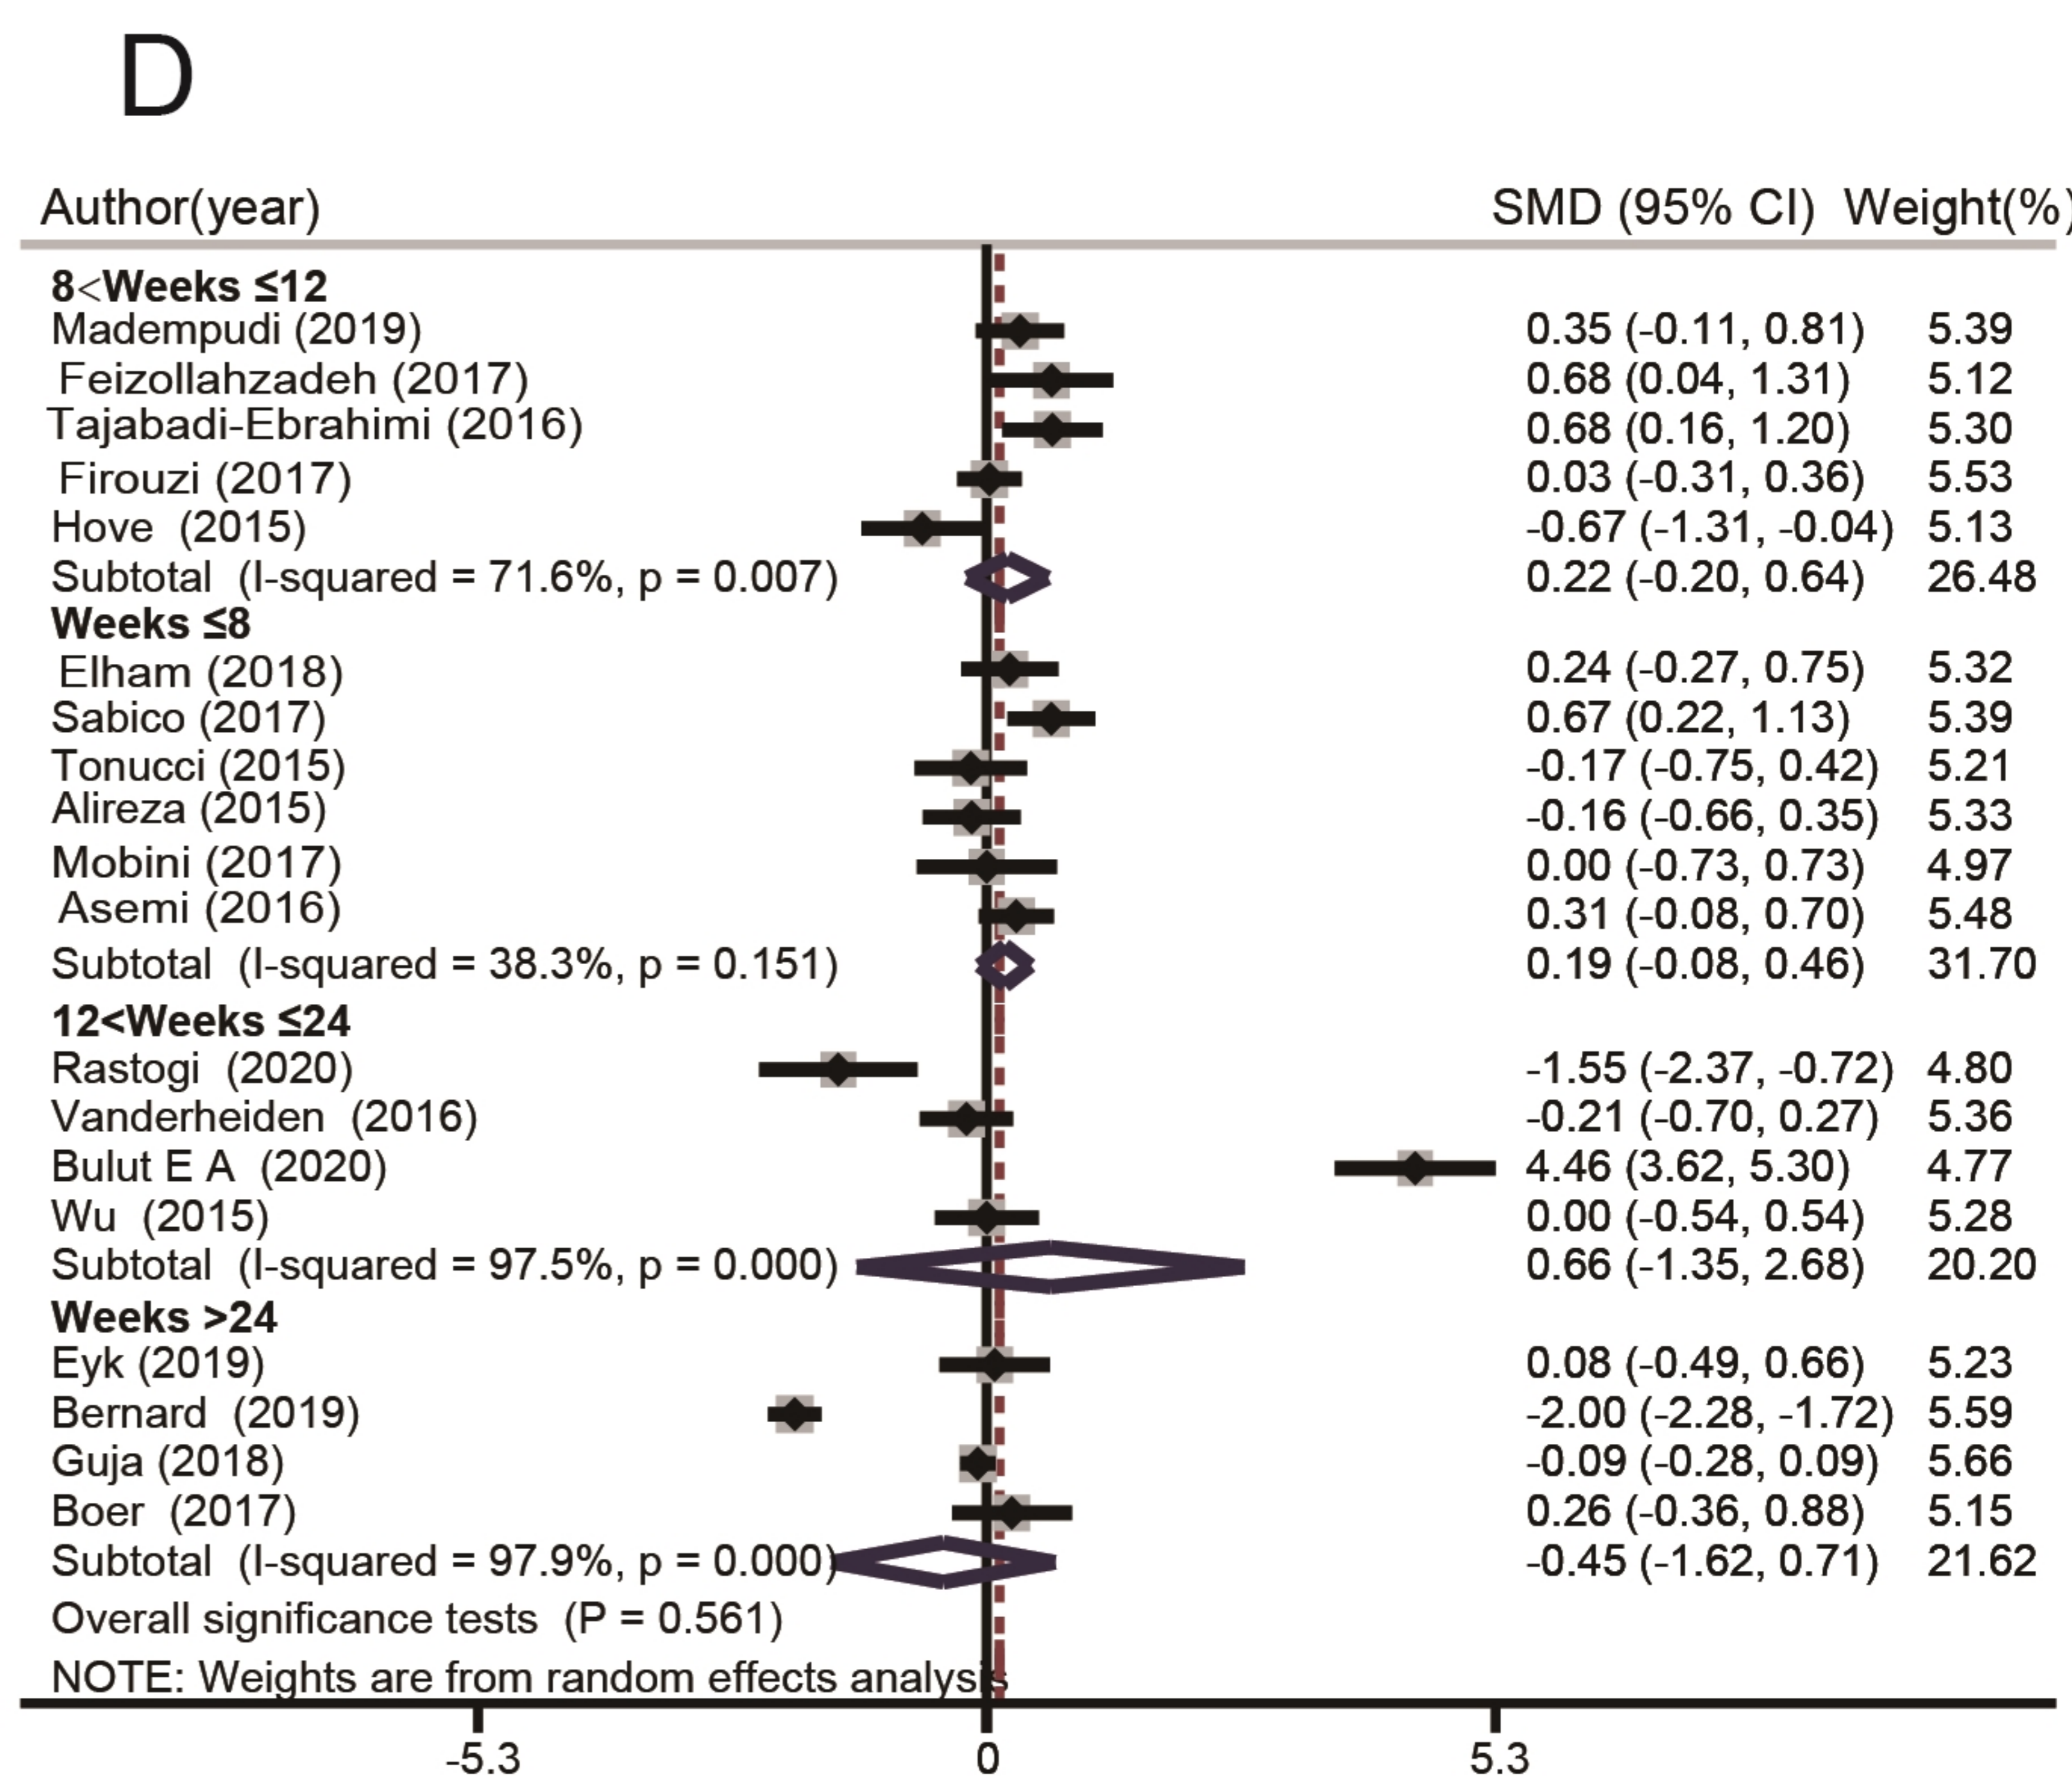



A

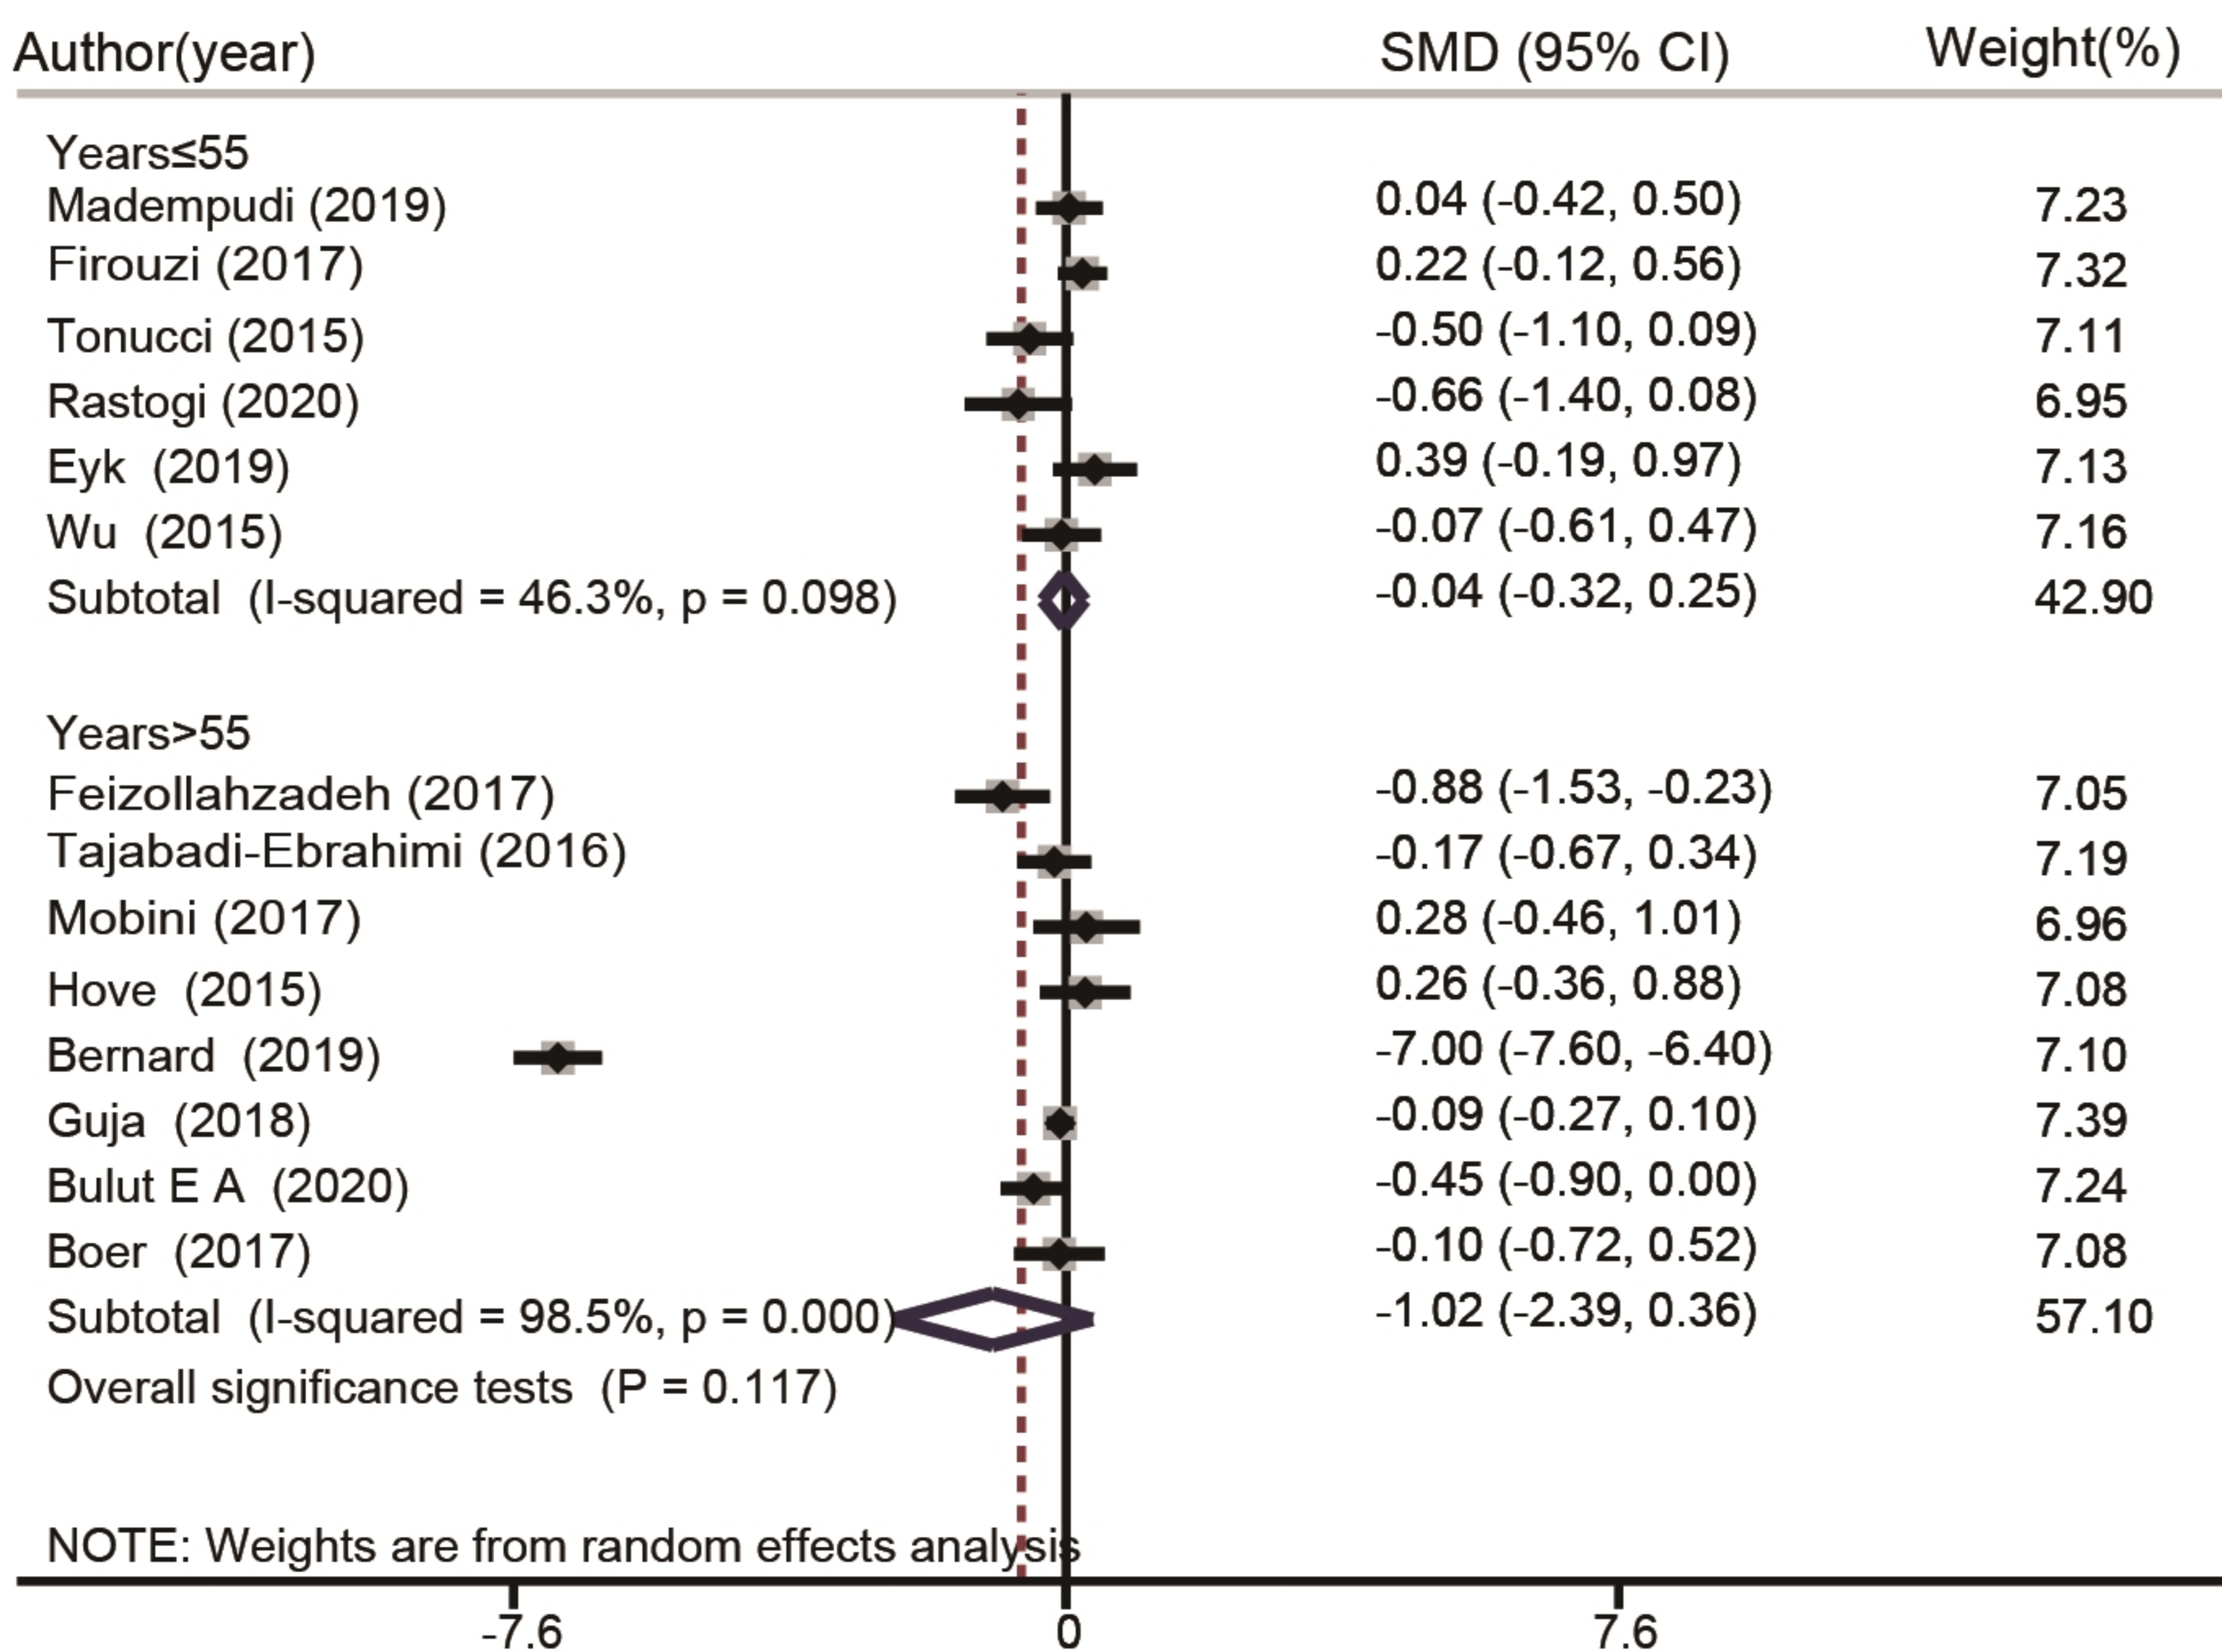

B

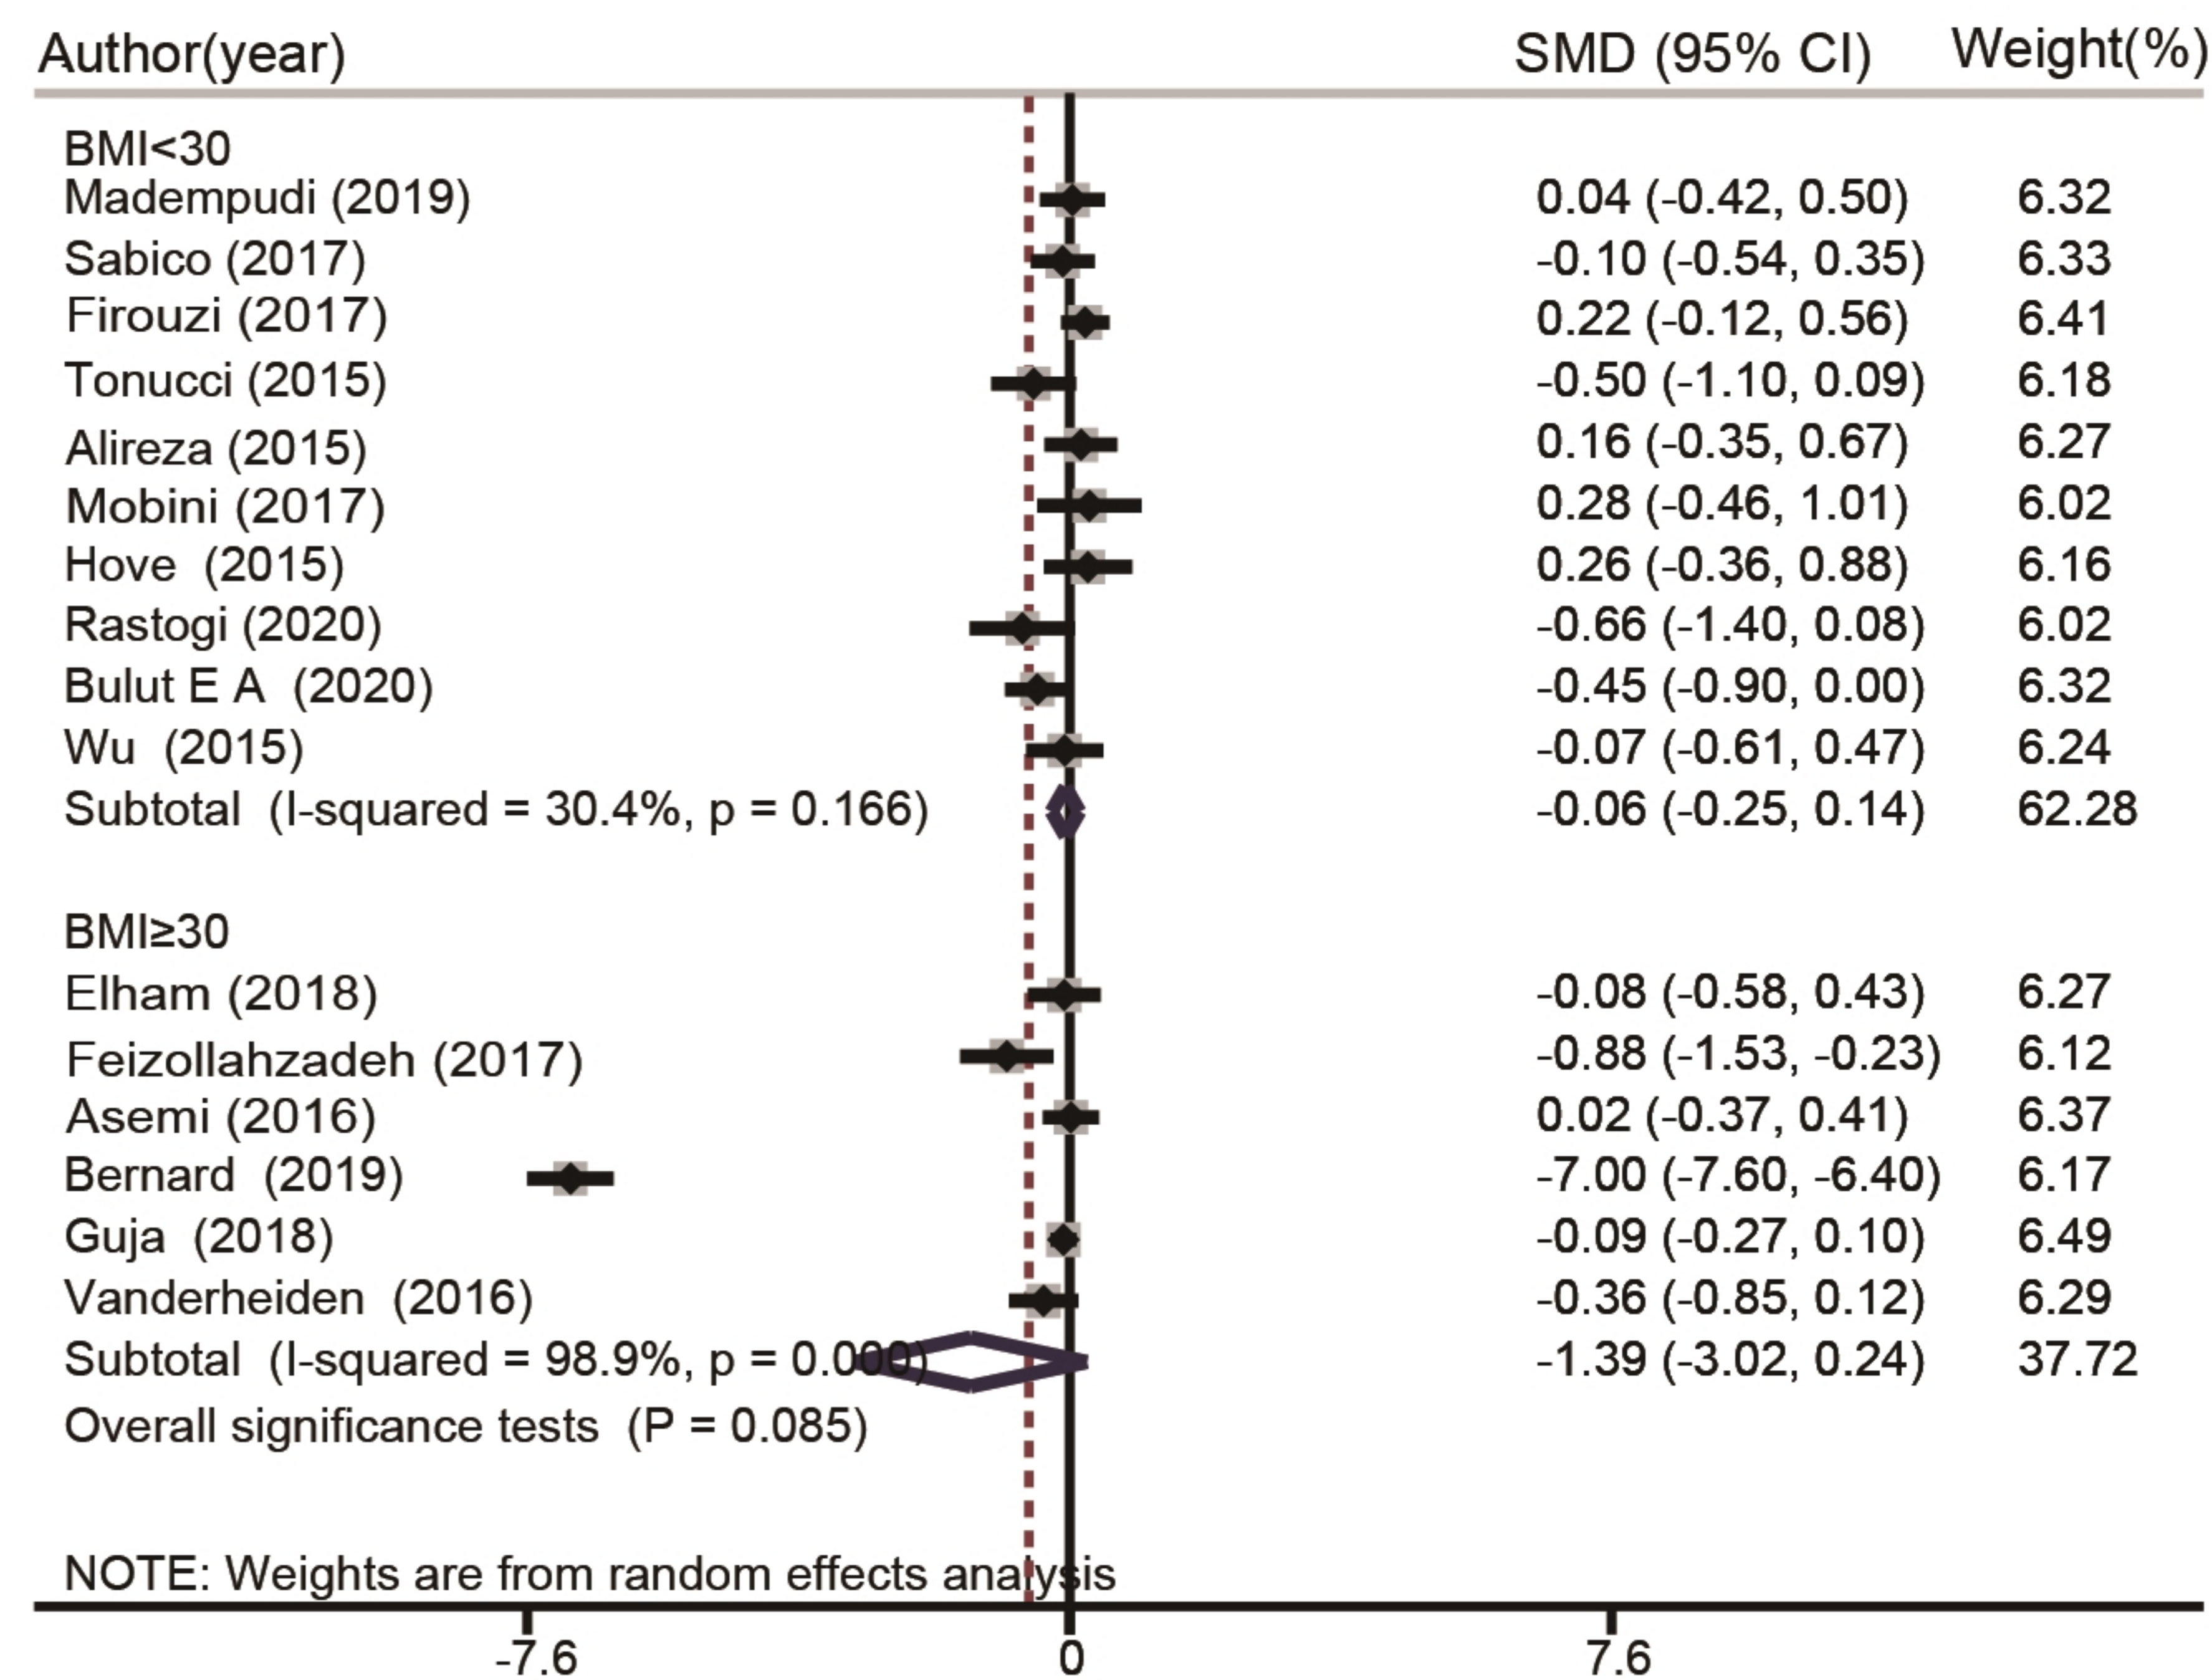

C

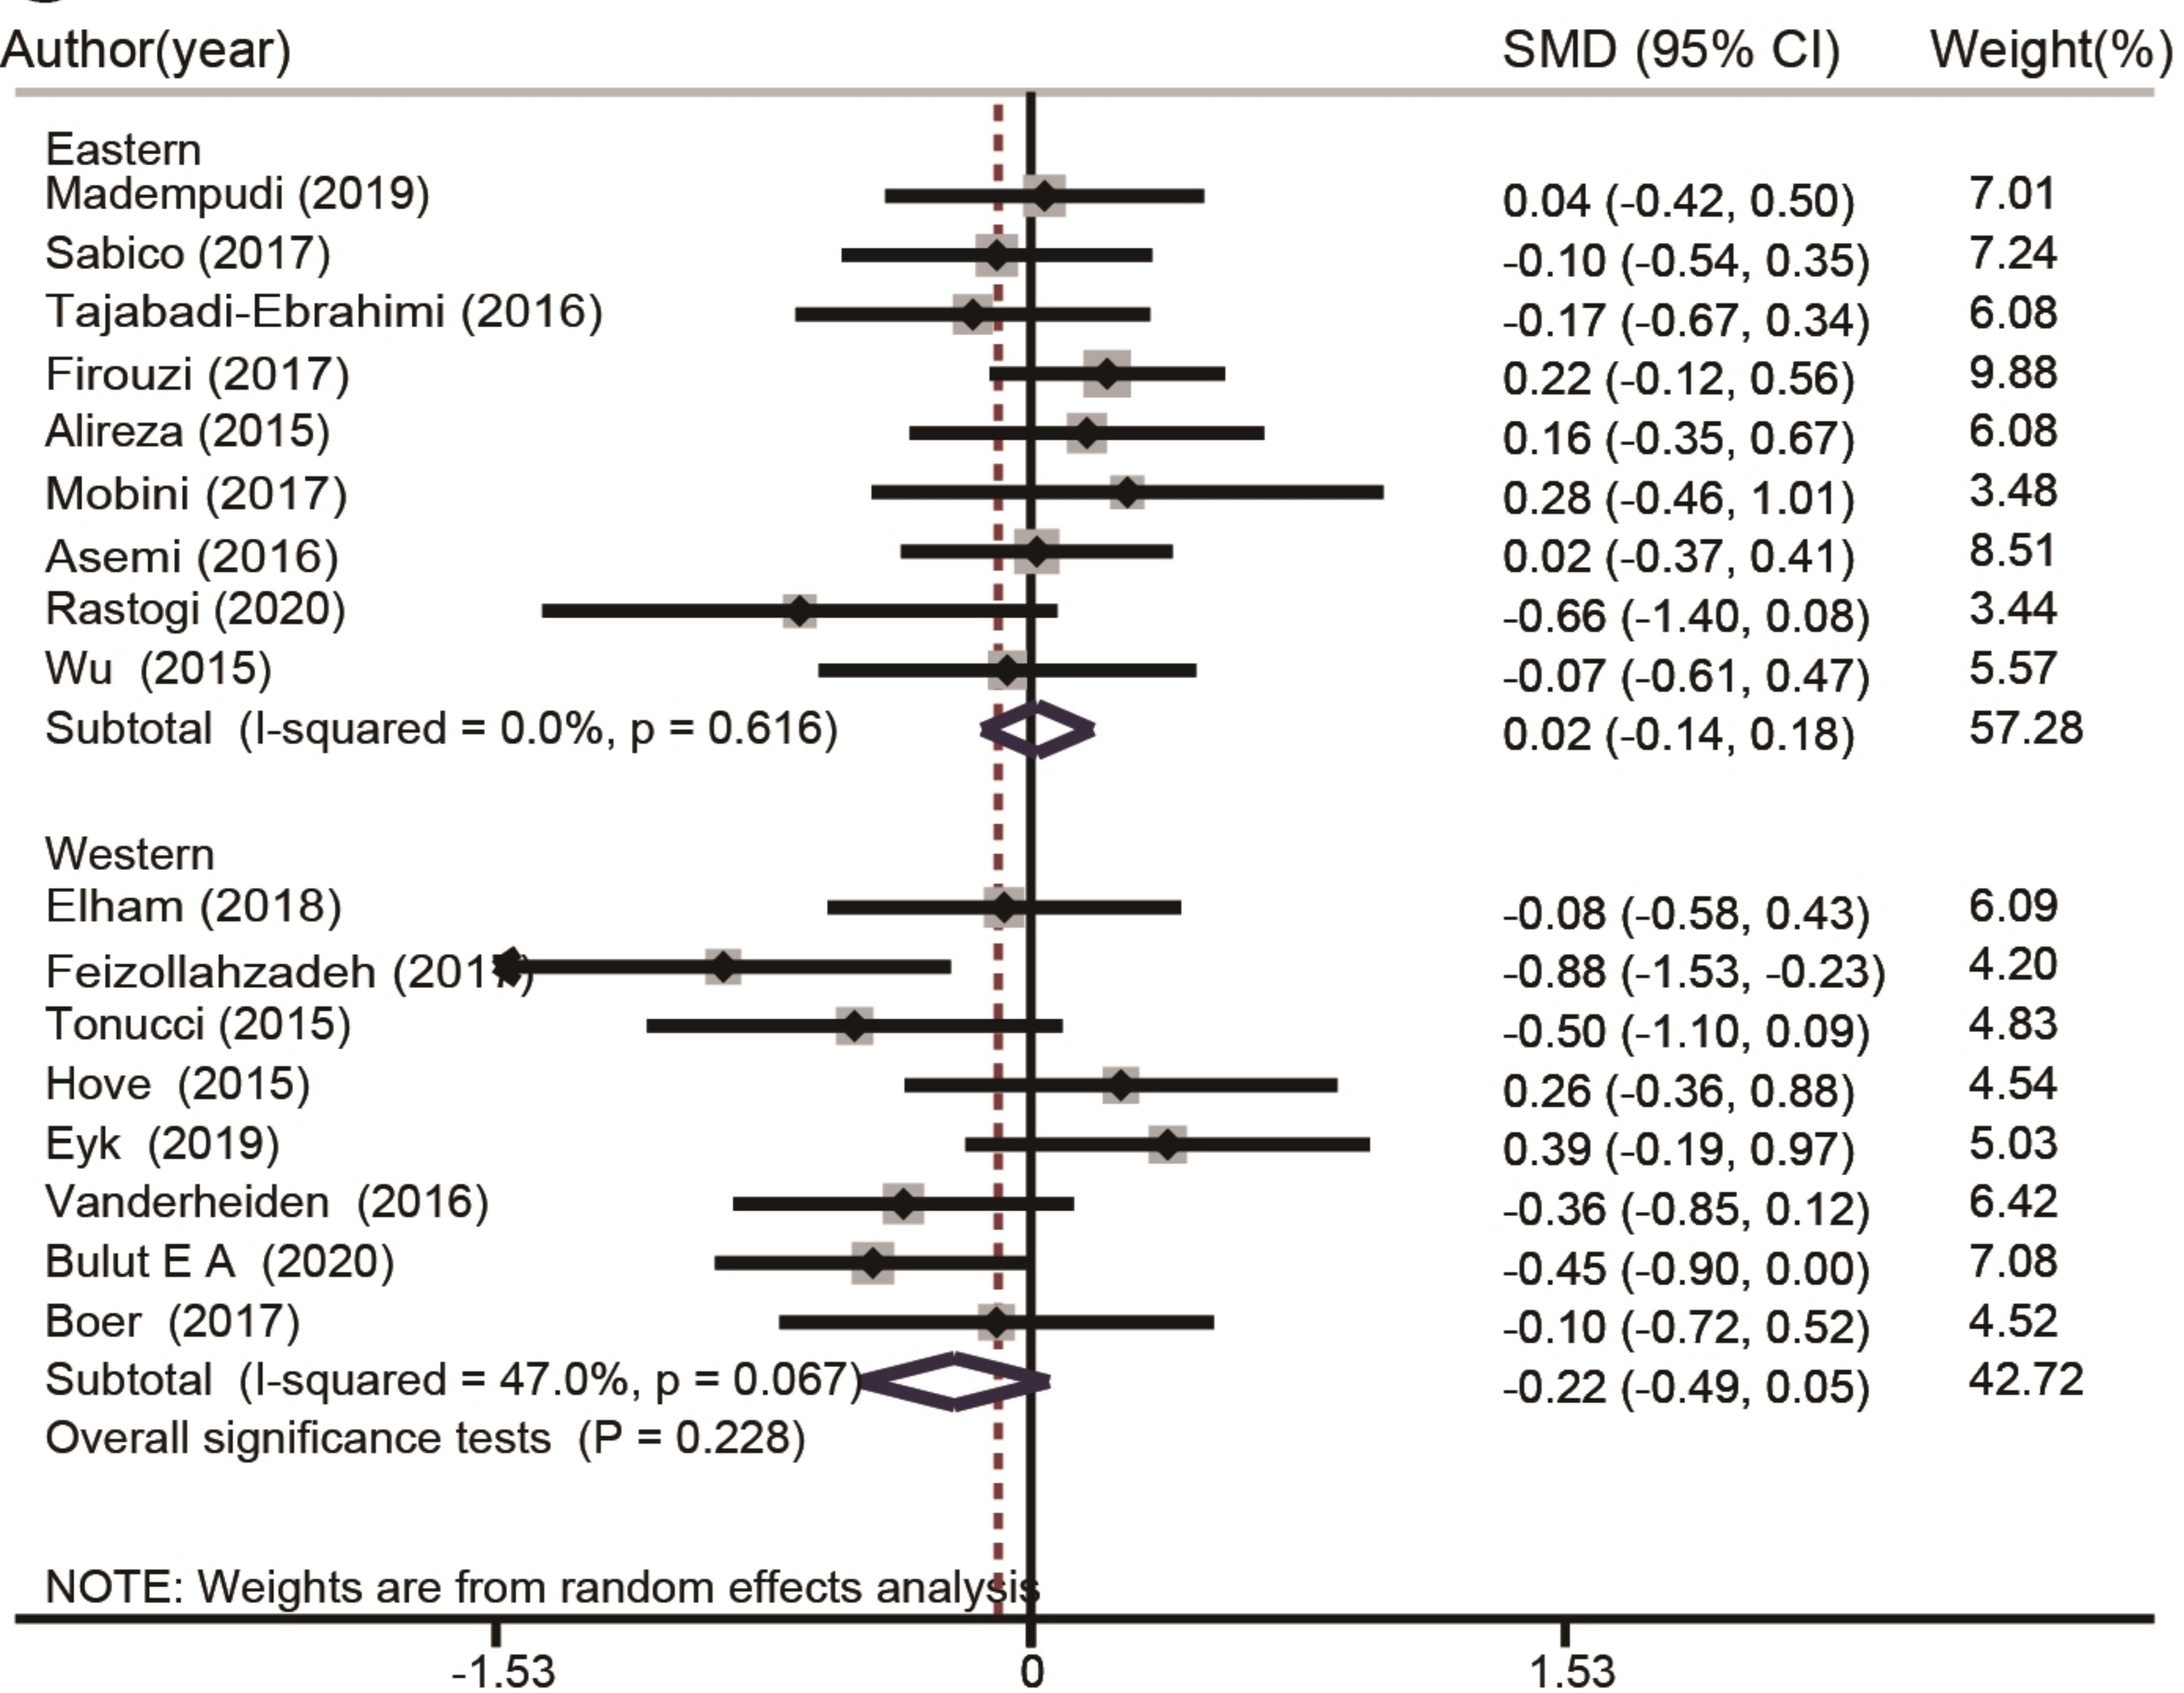

D

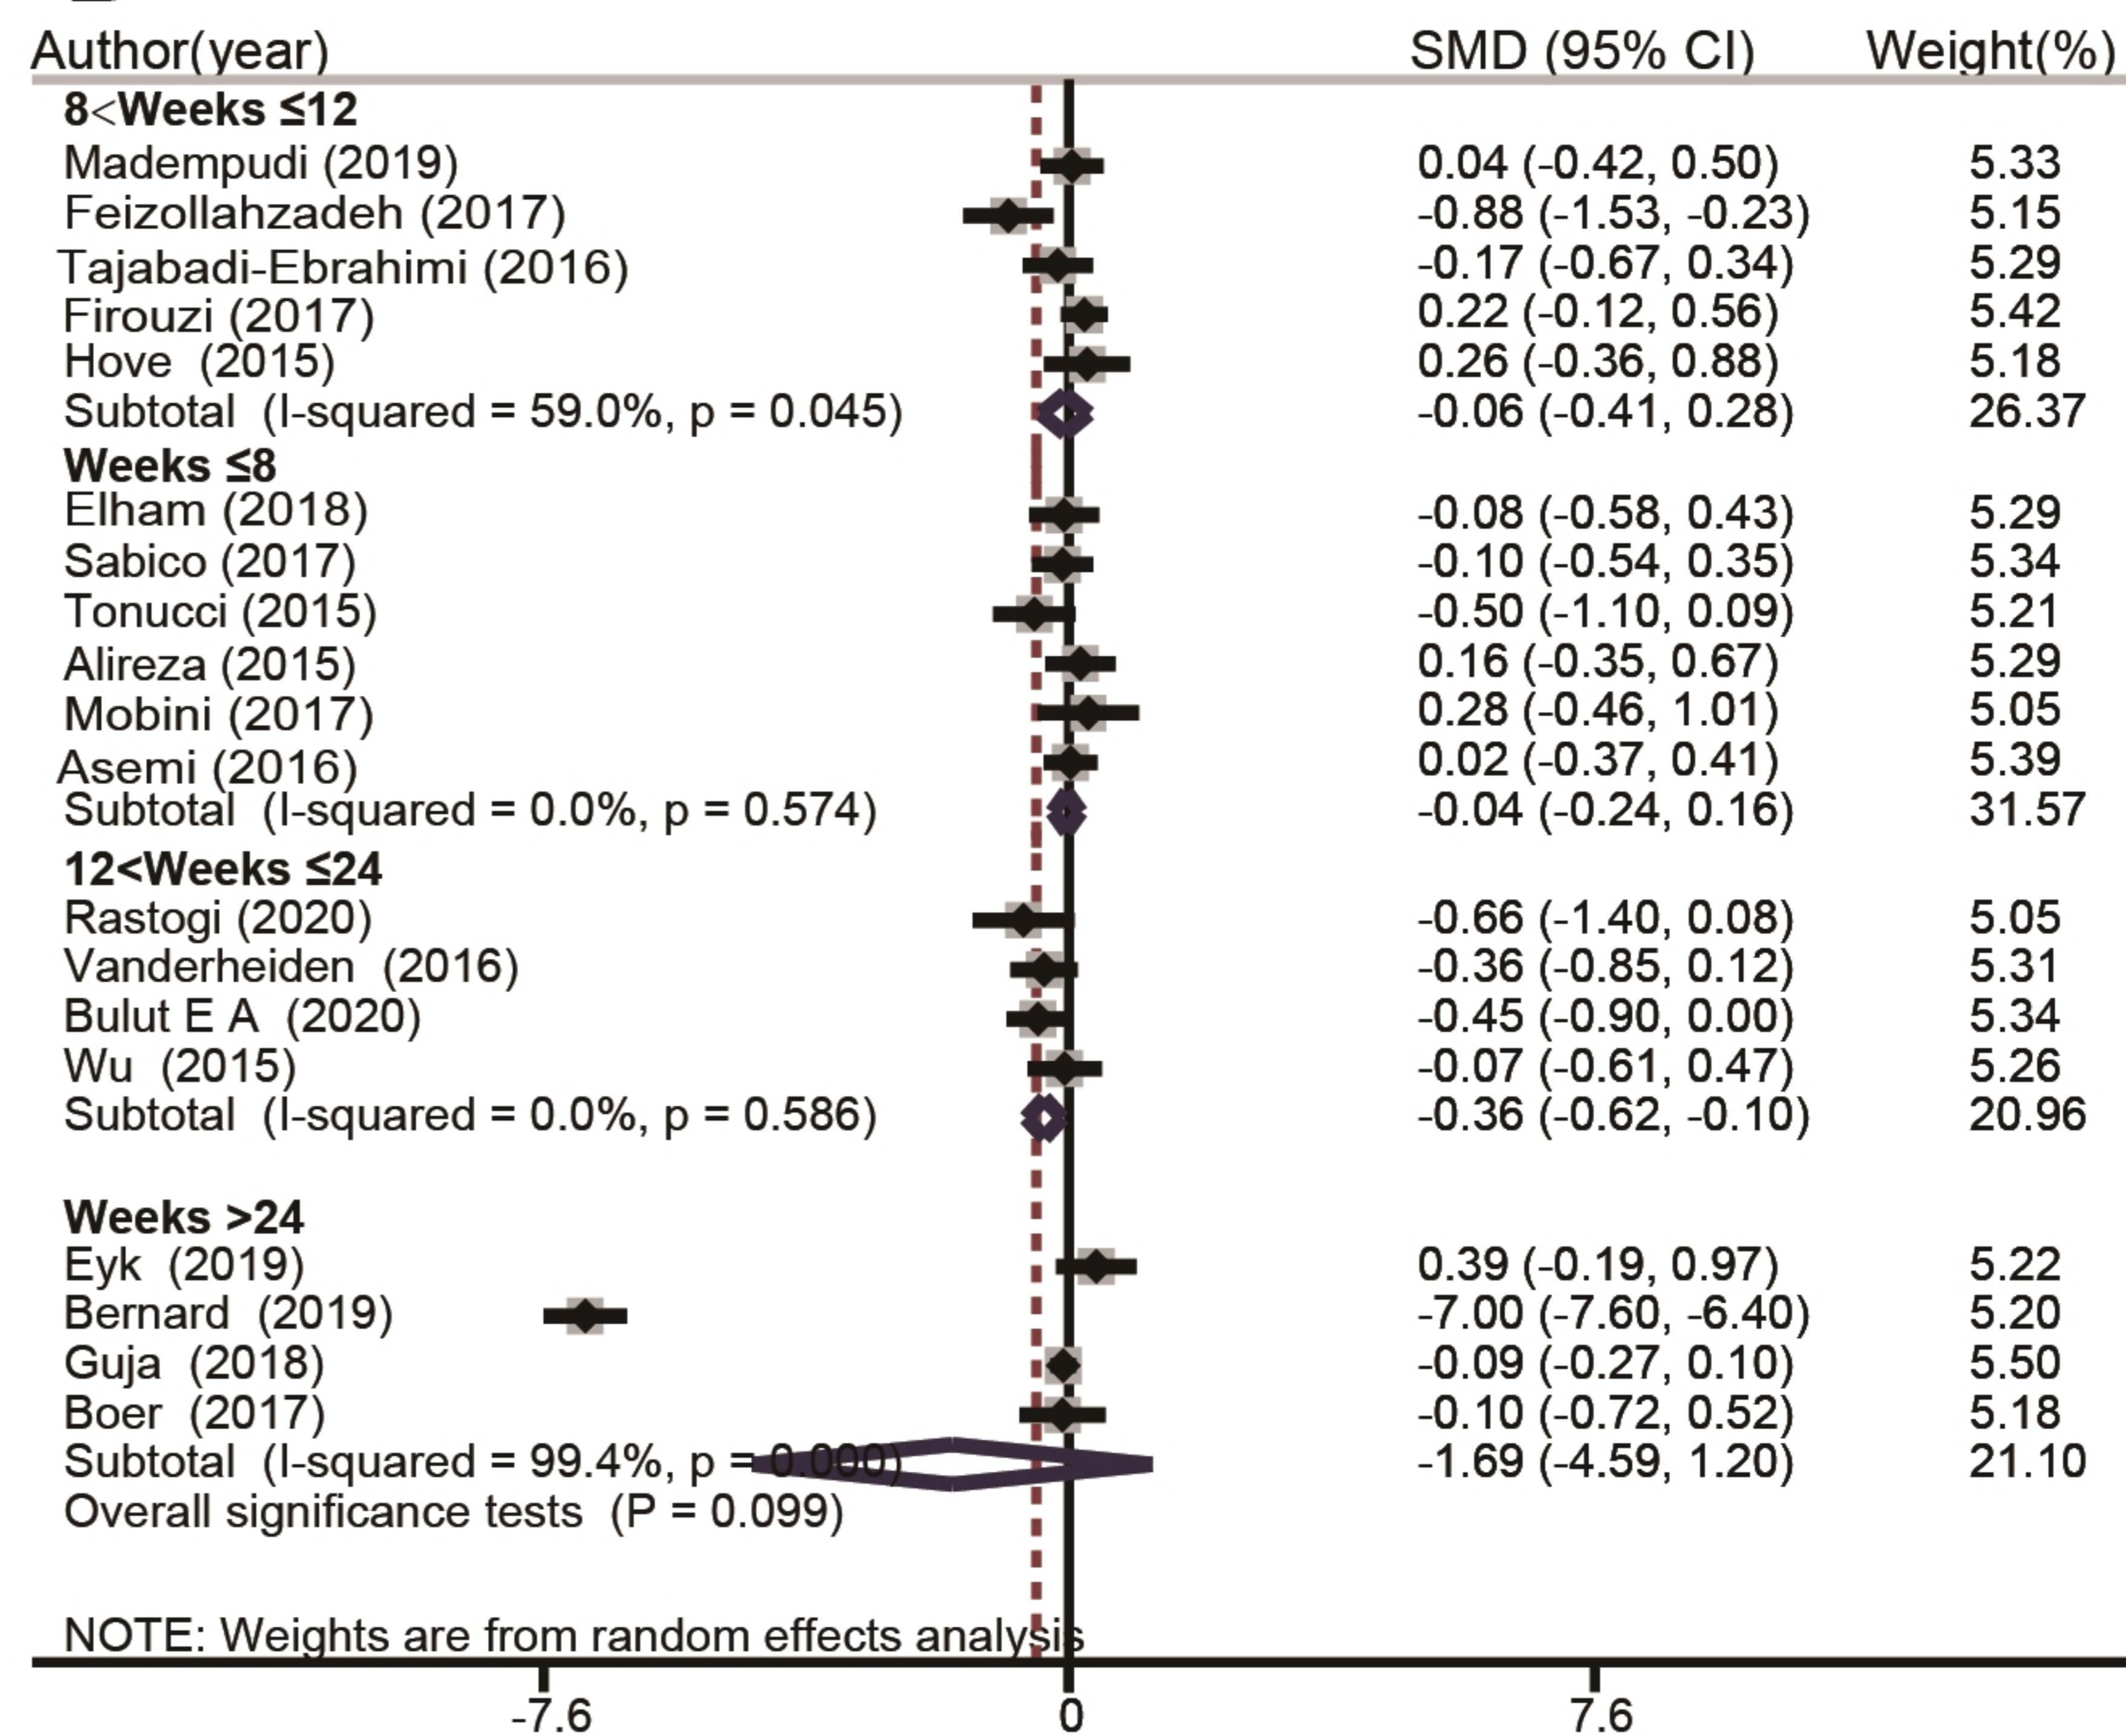

A

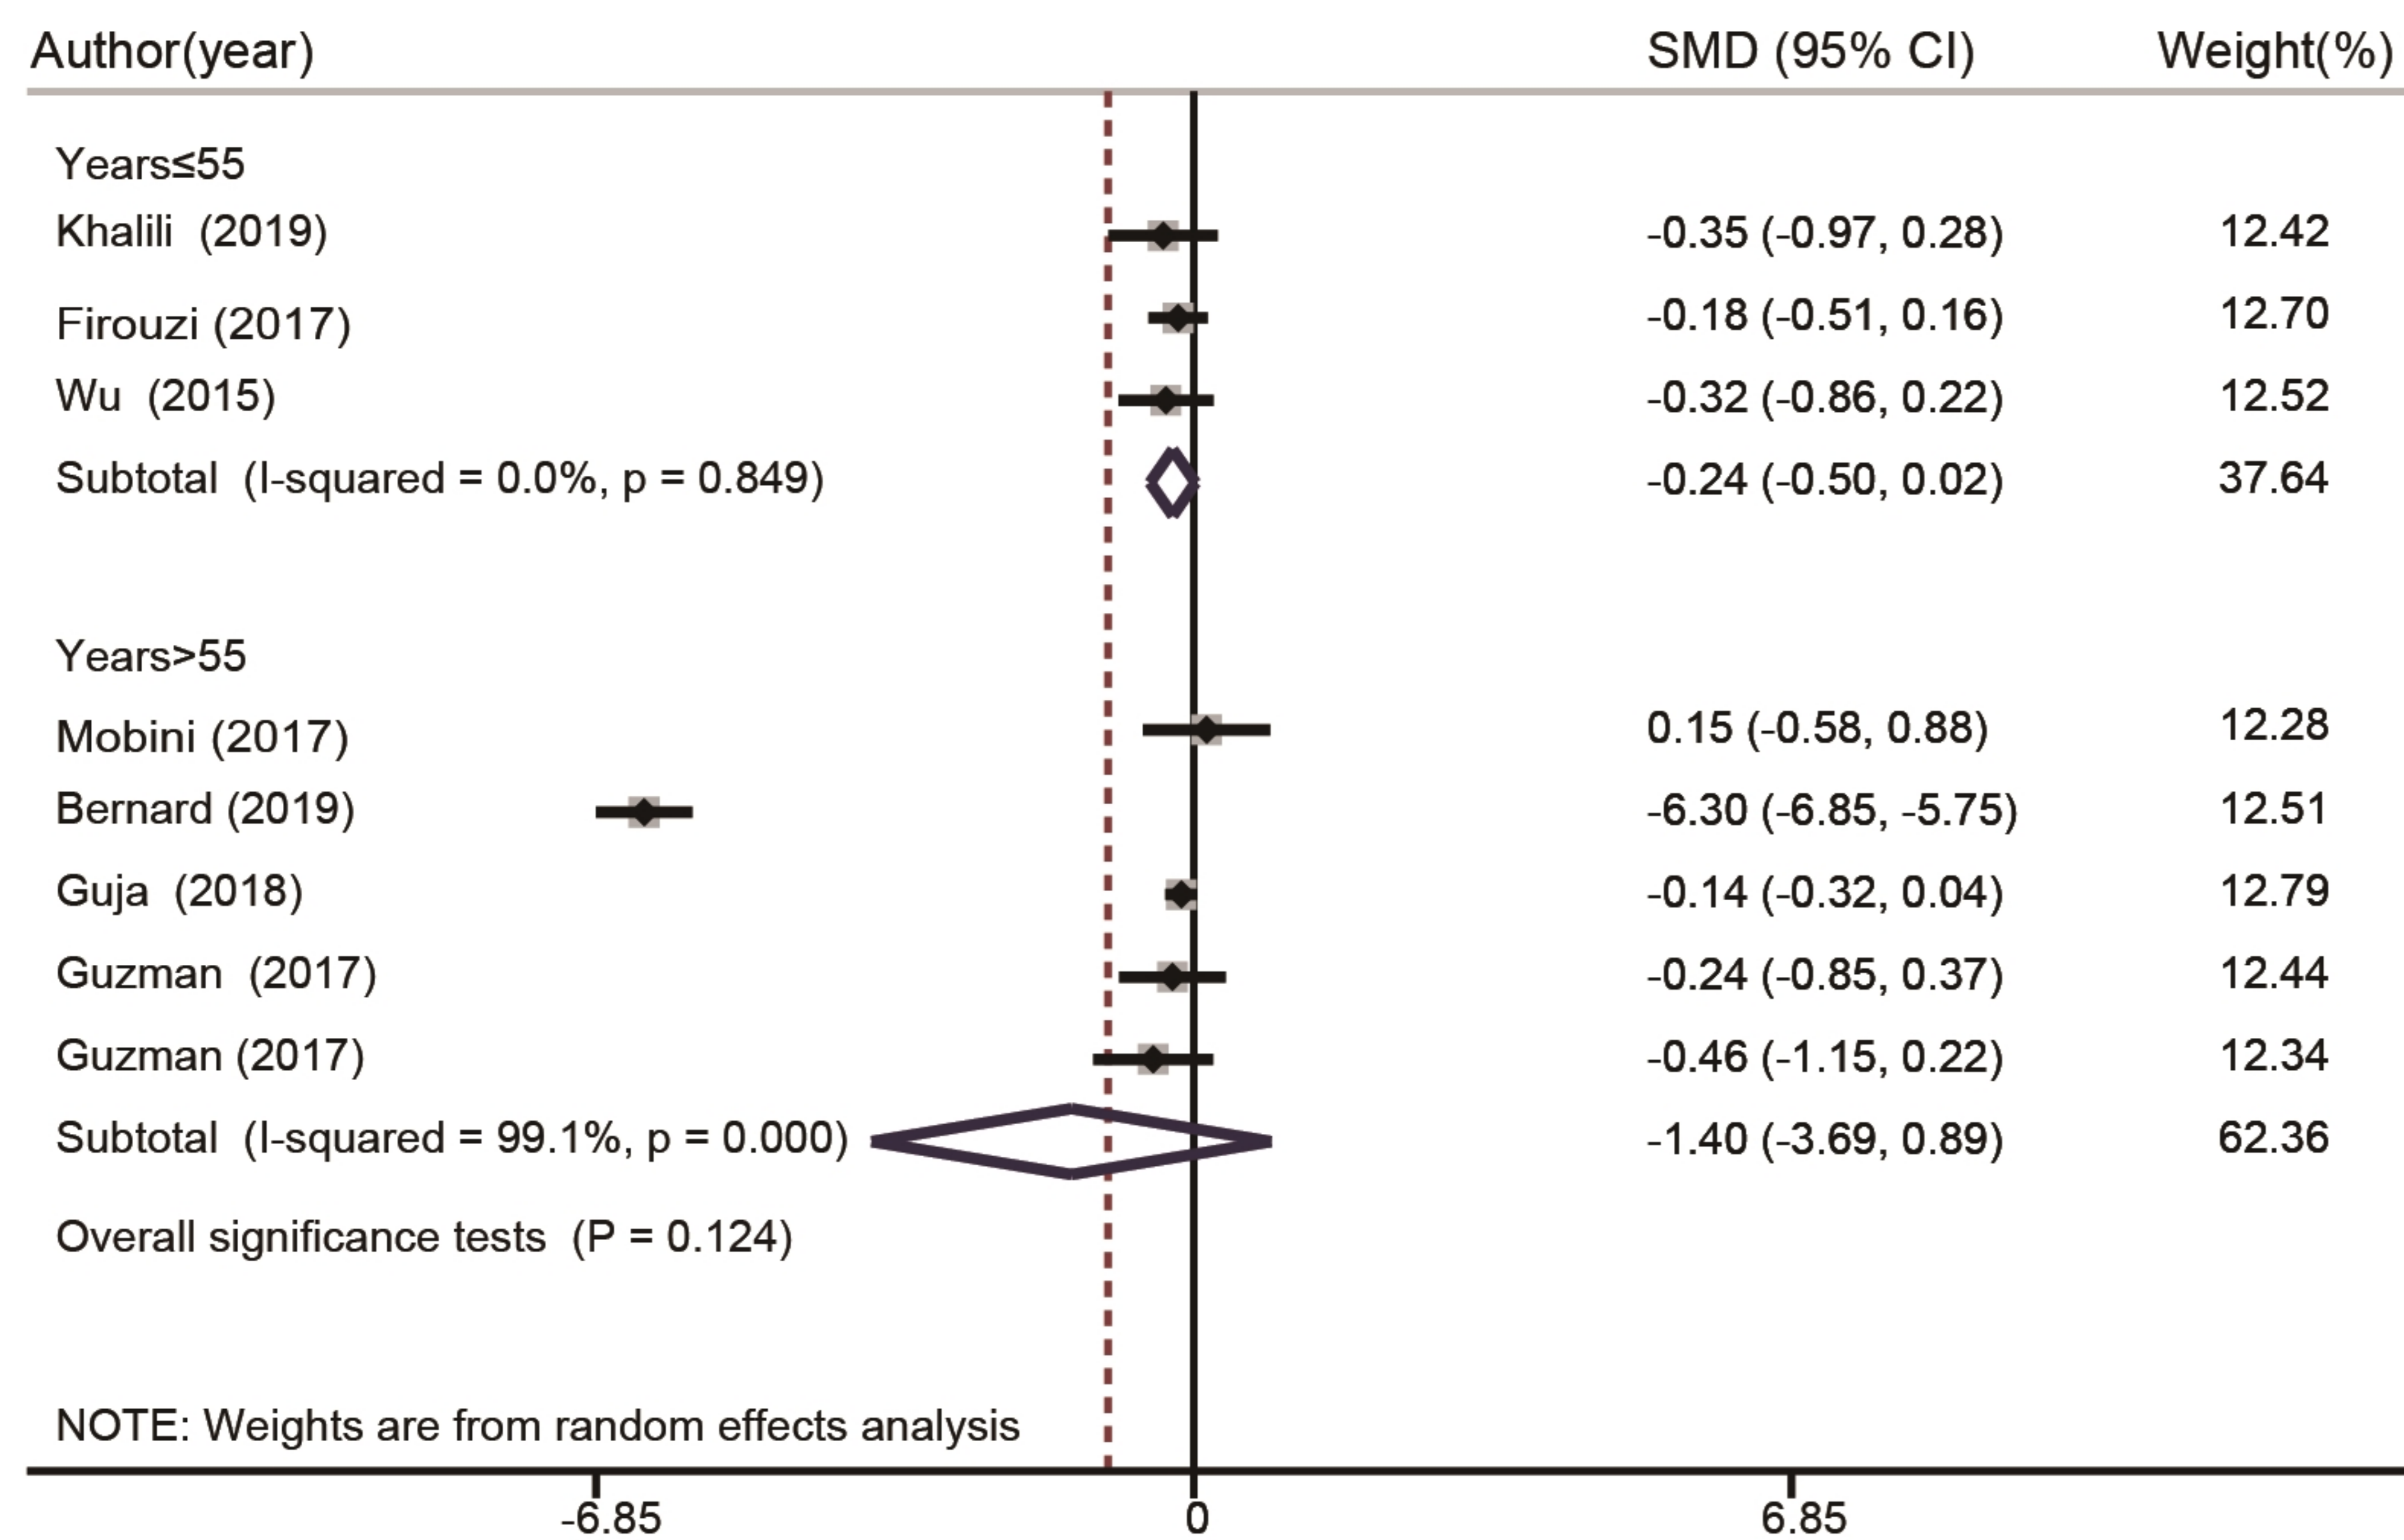

B

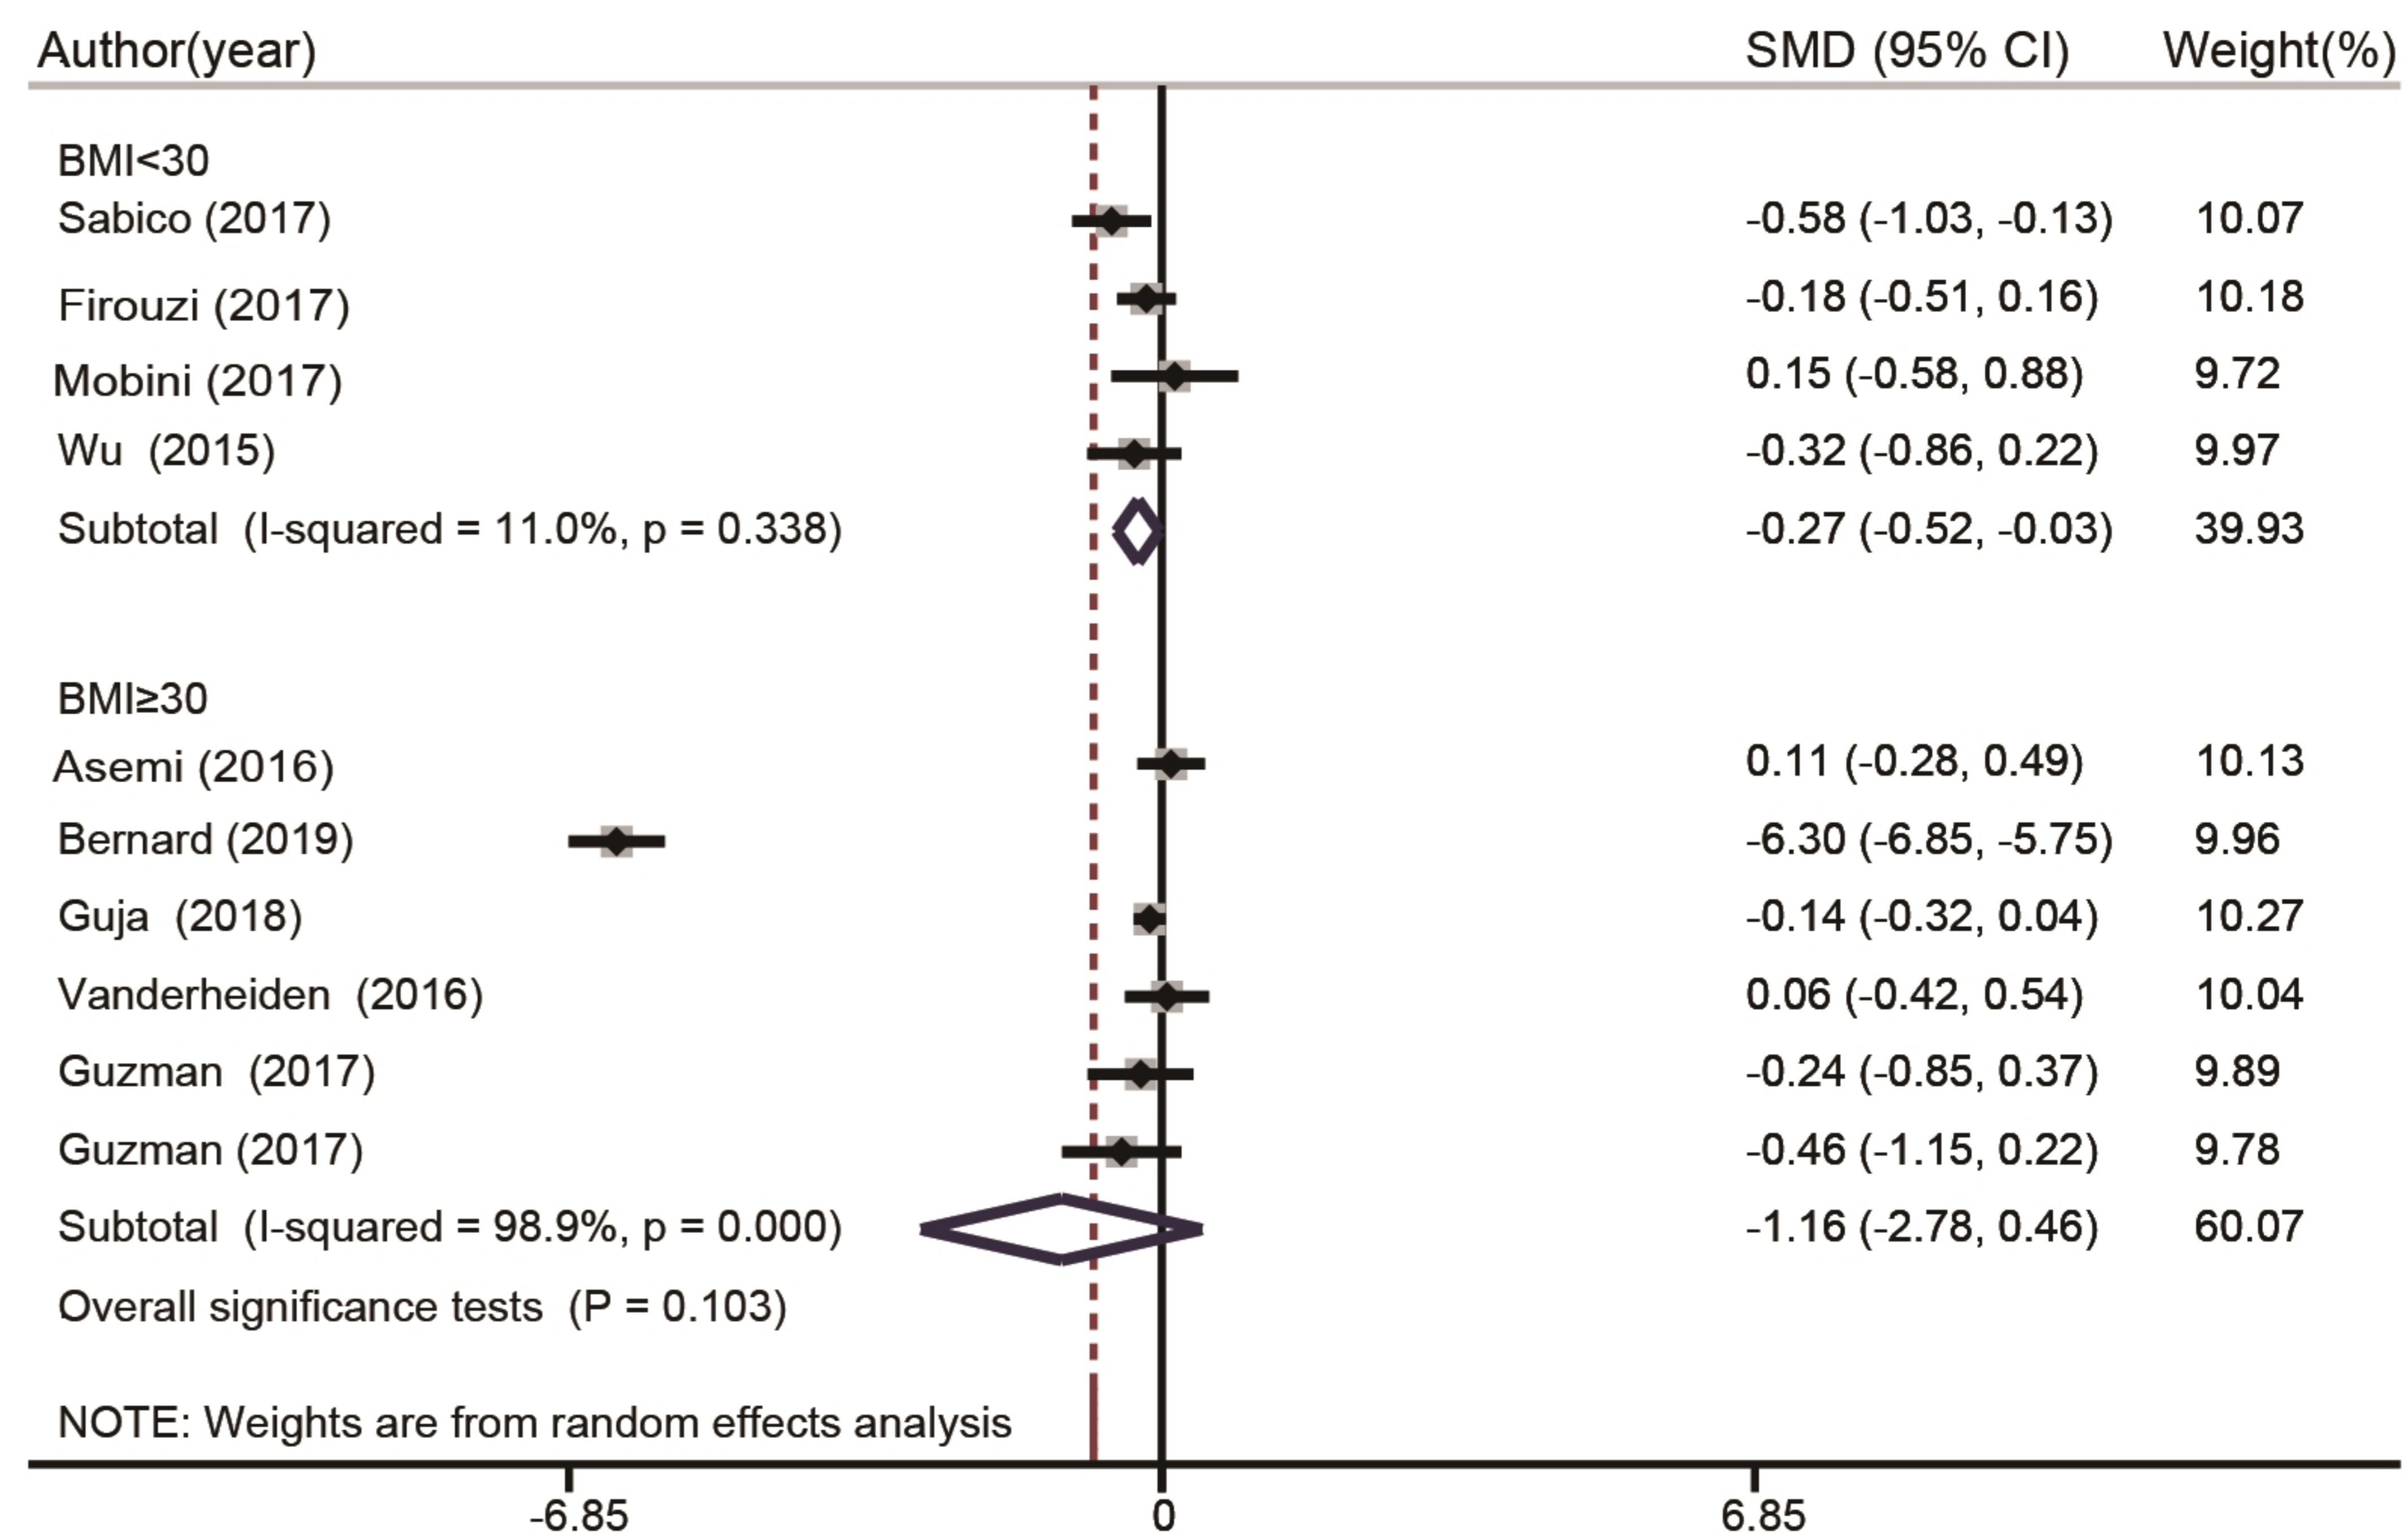

C

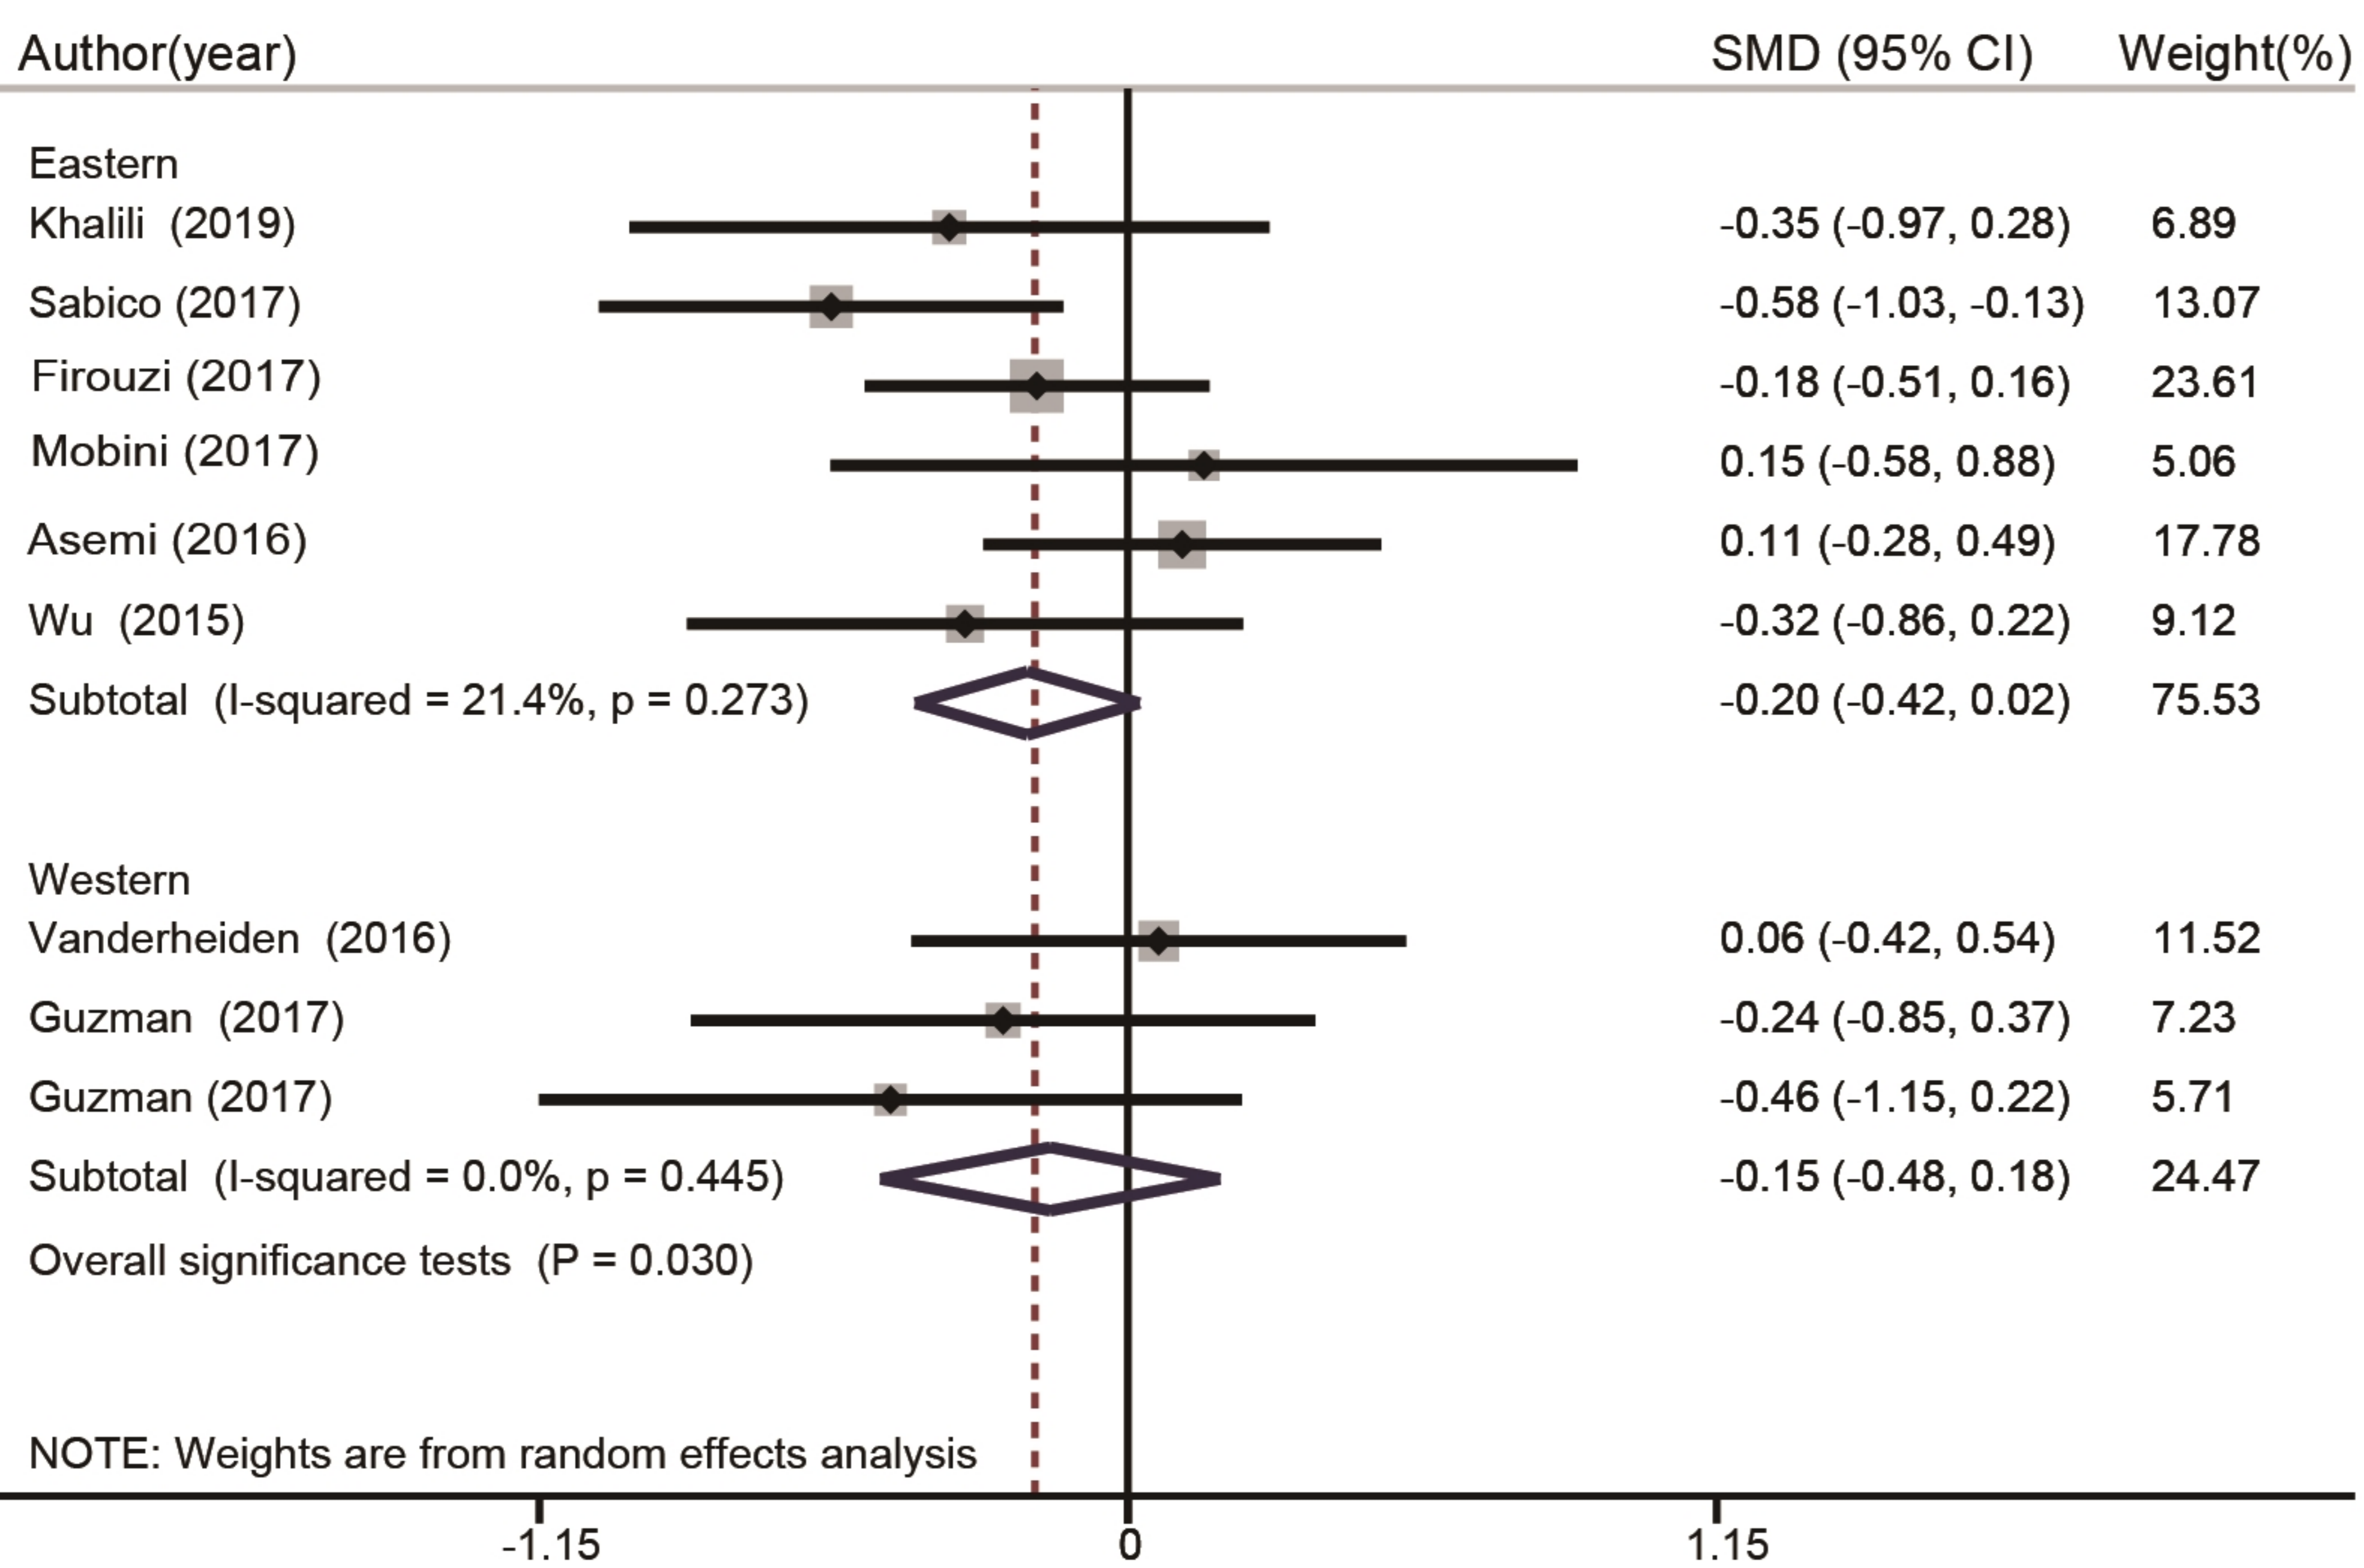

D

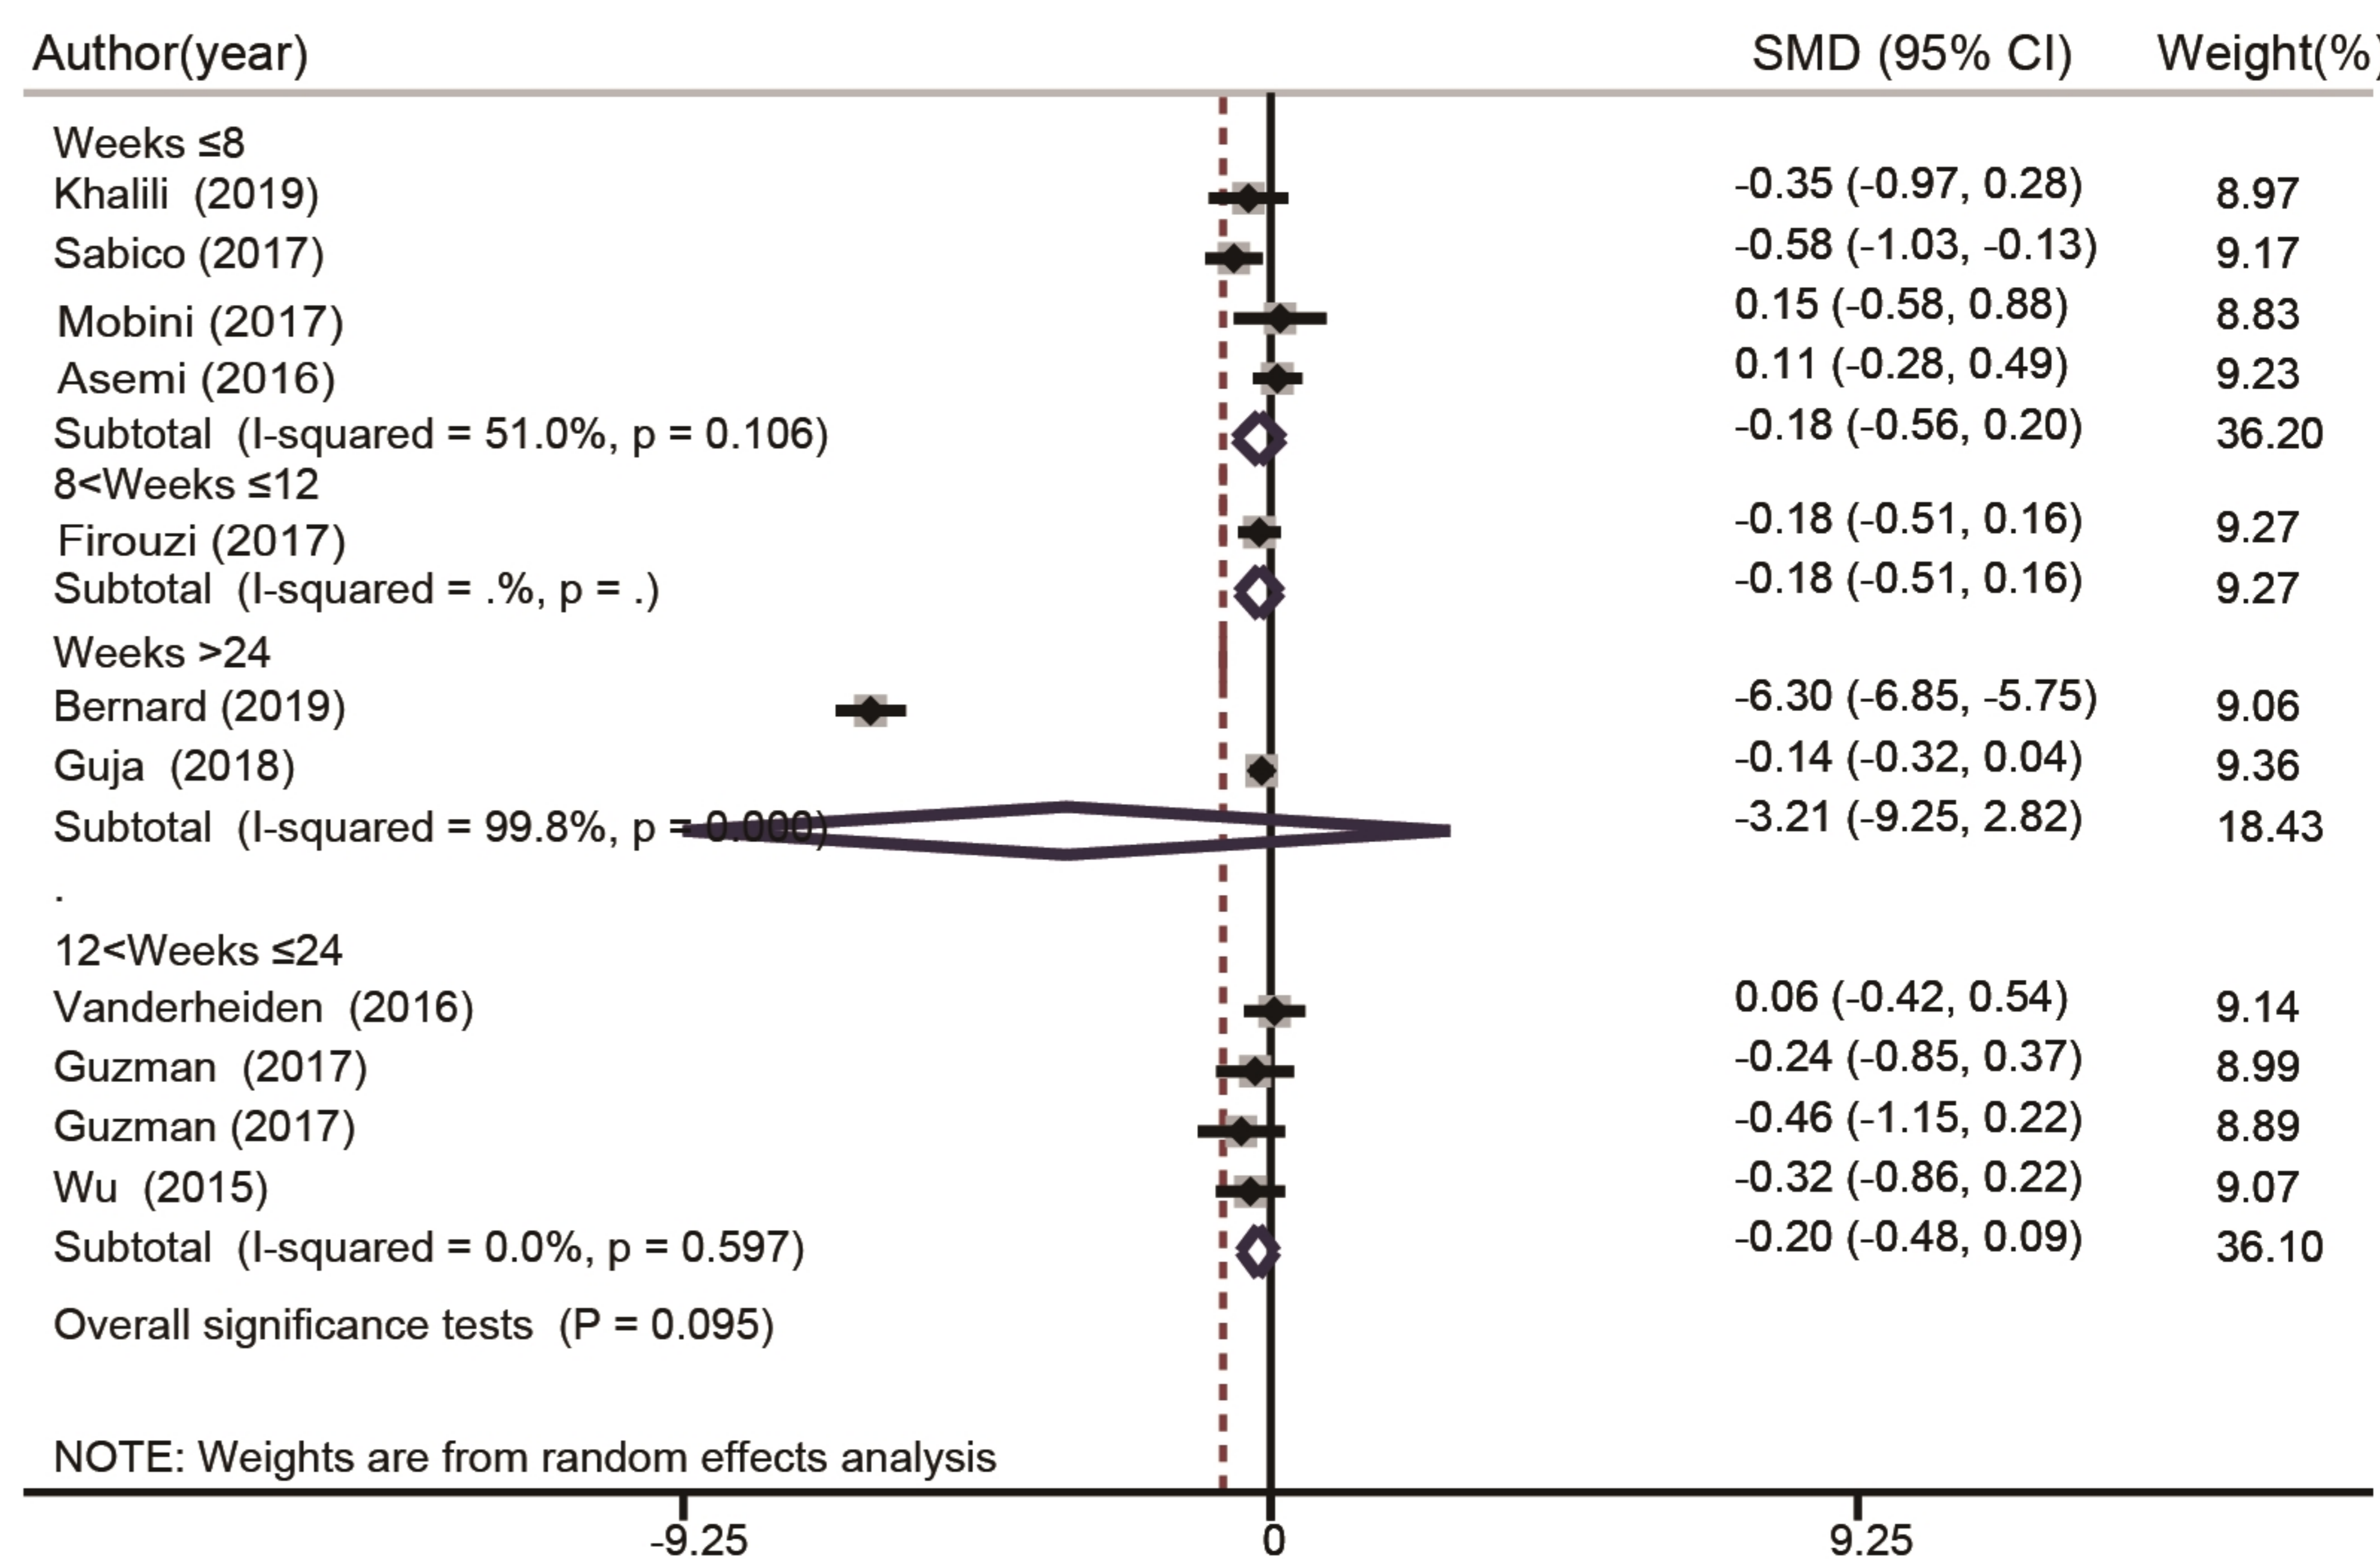

A

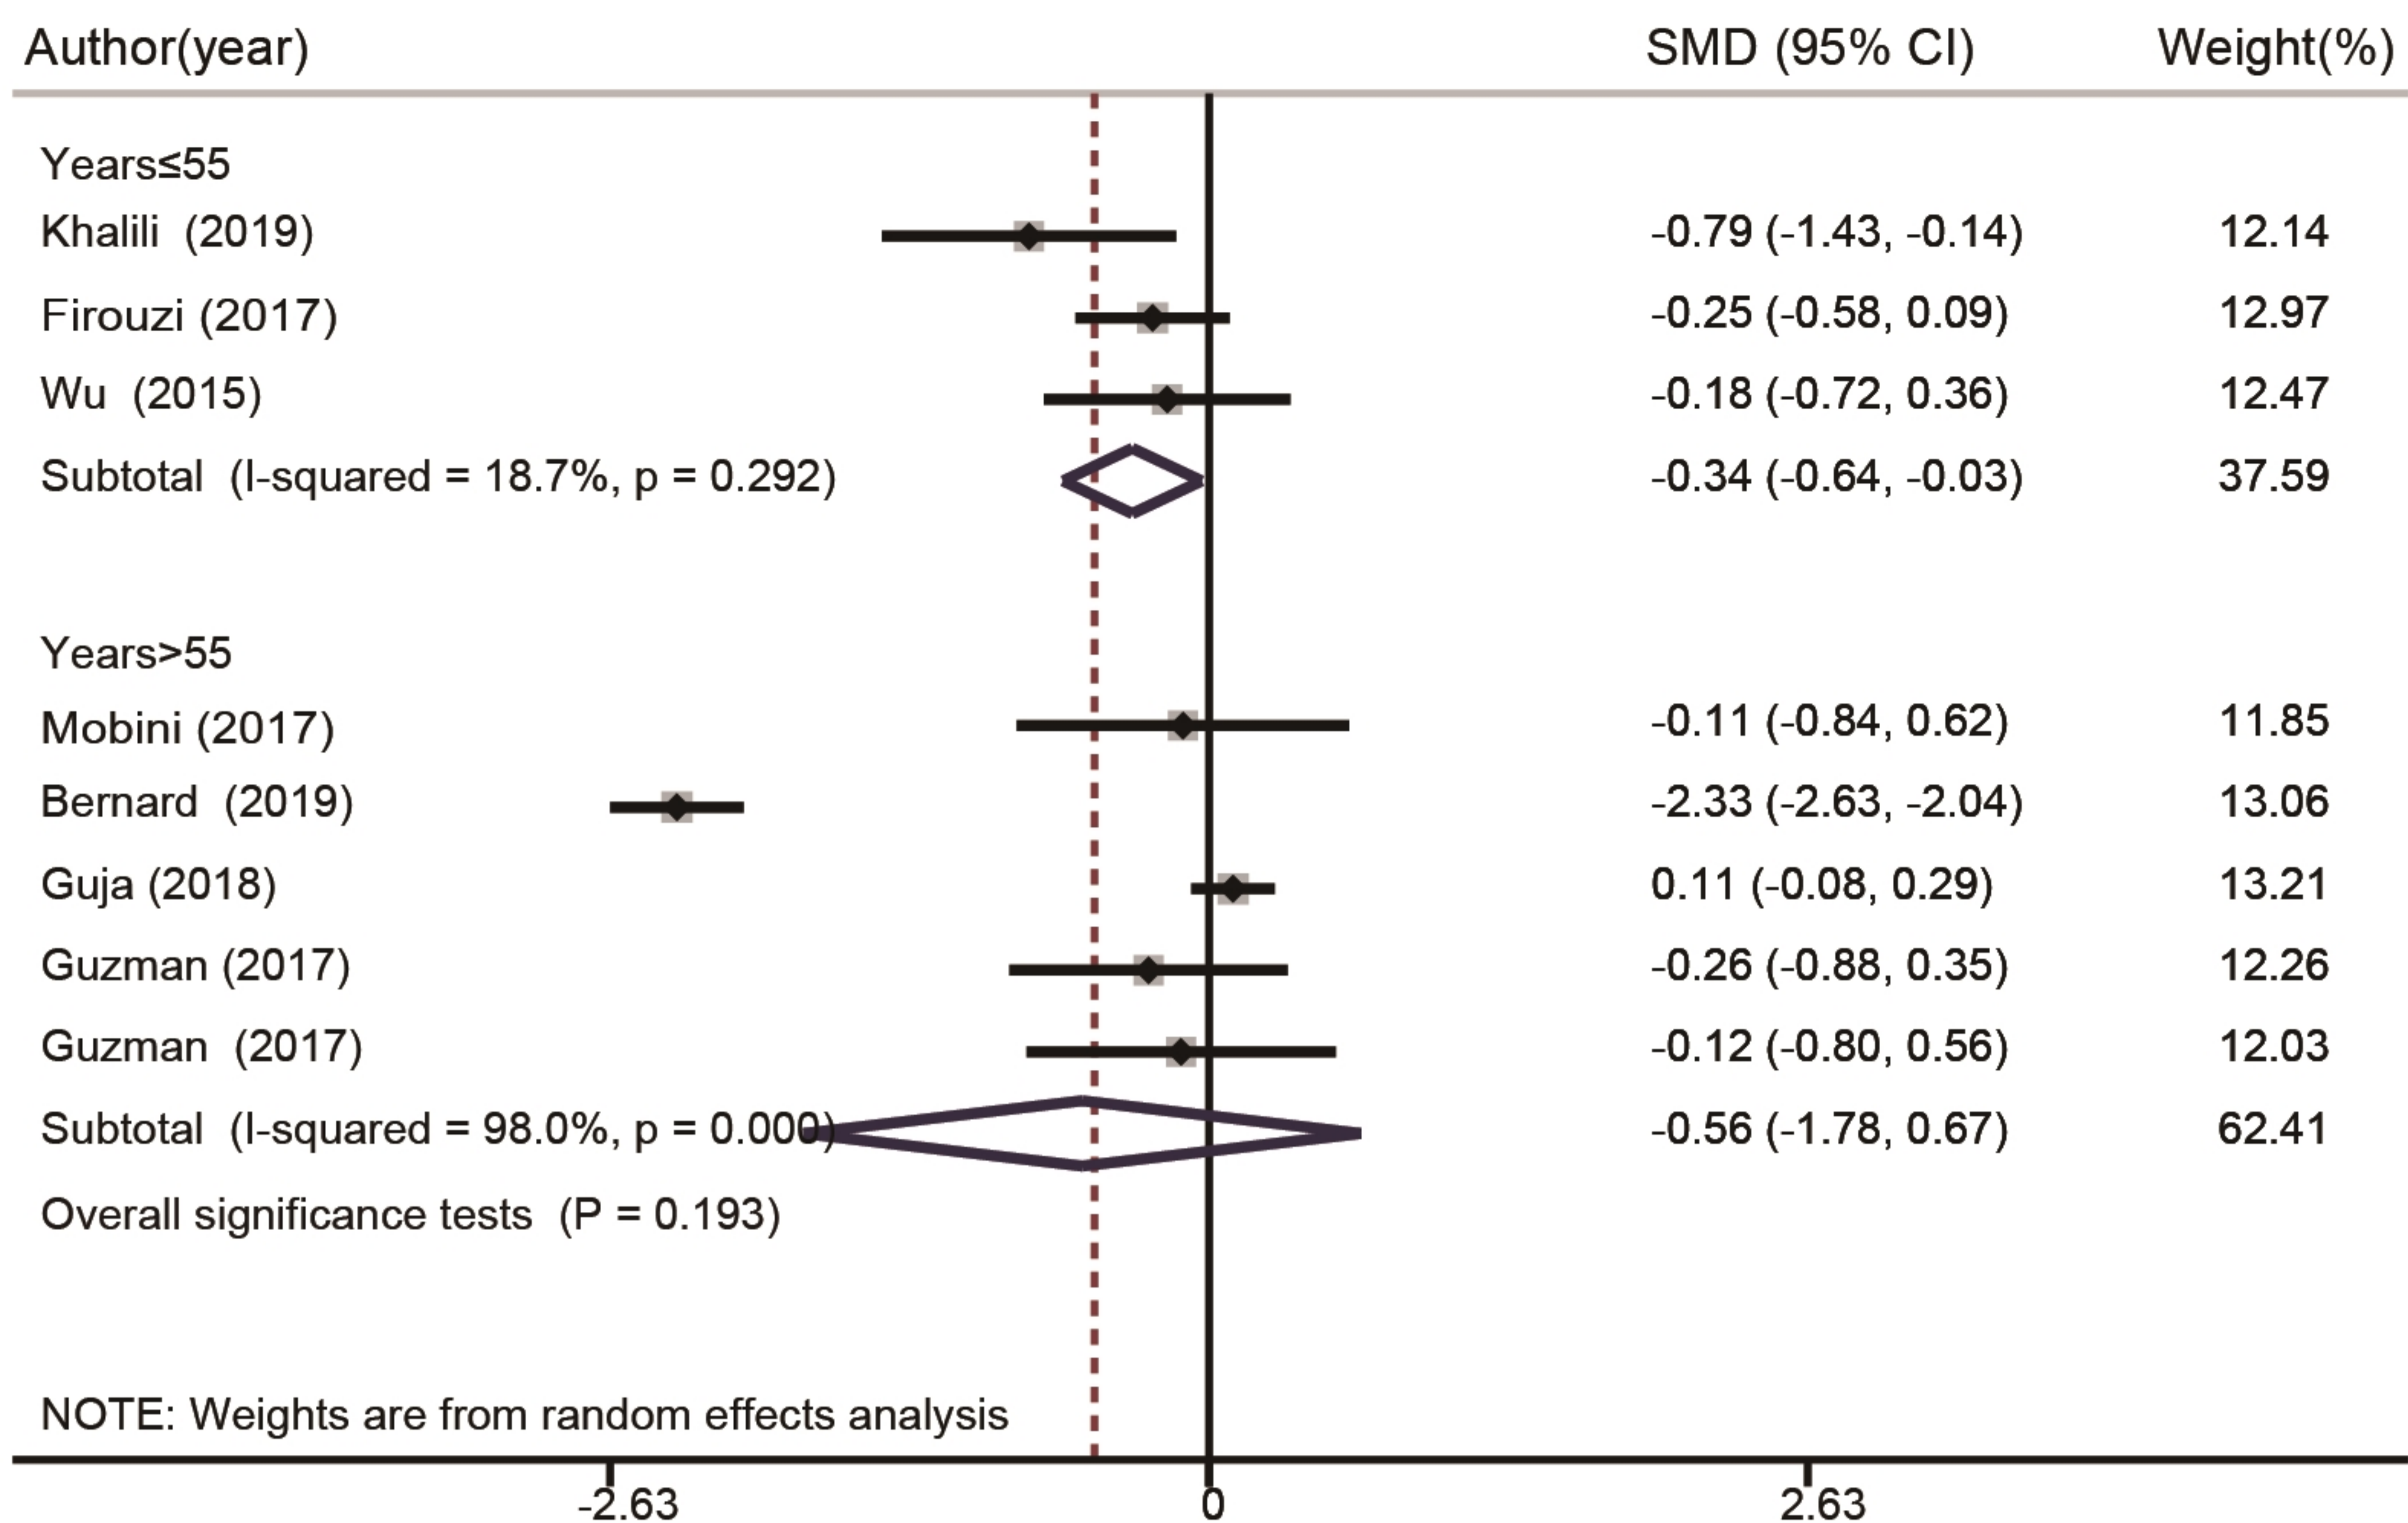

B

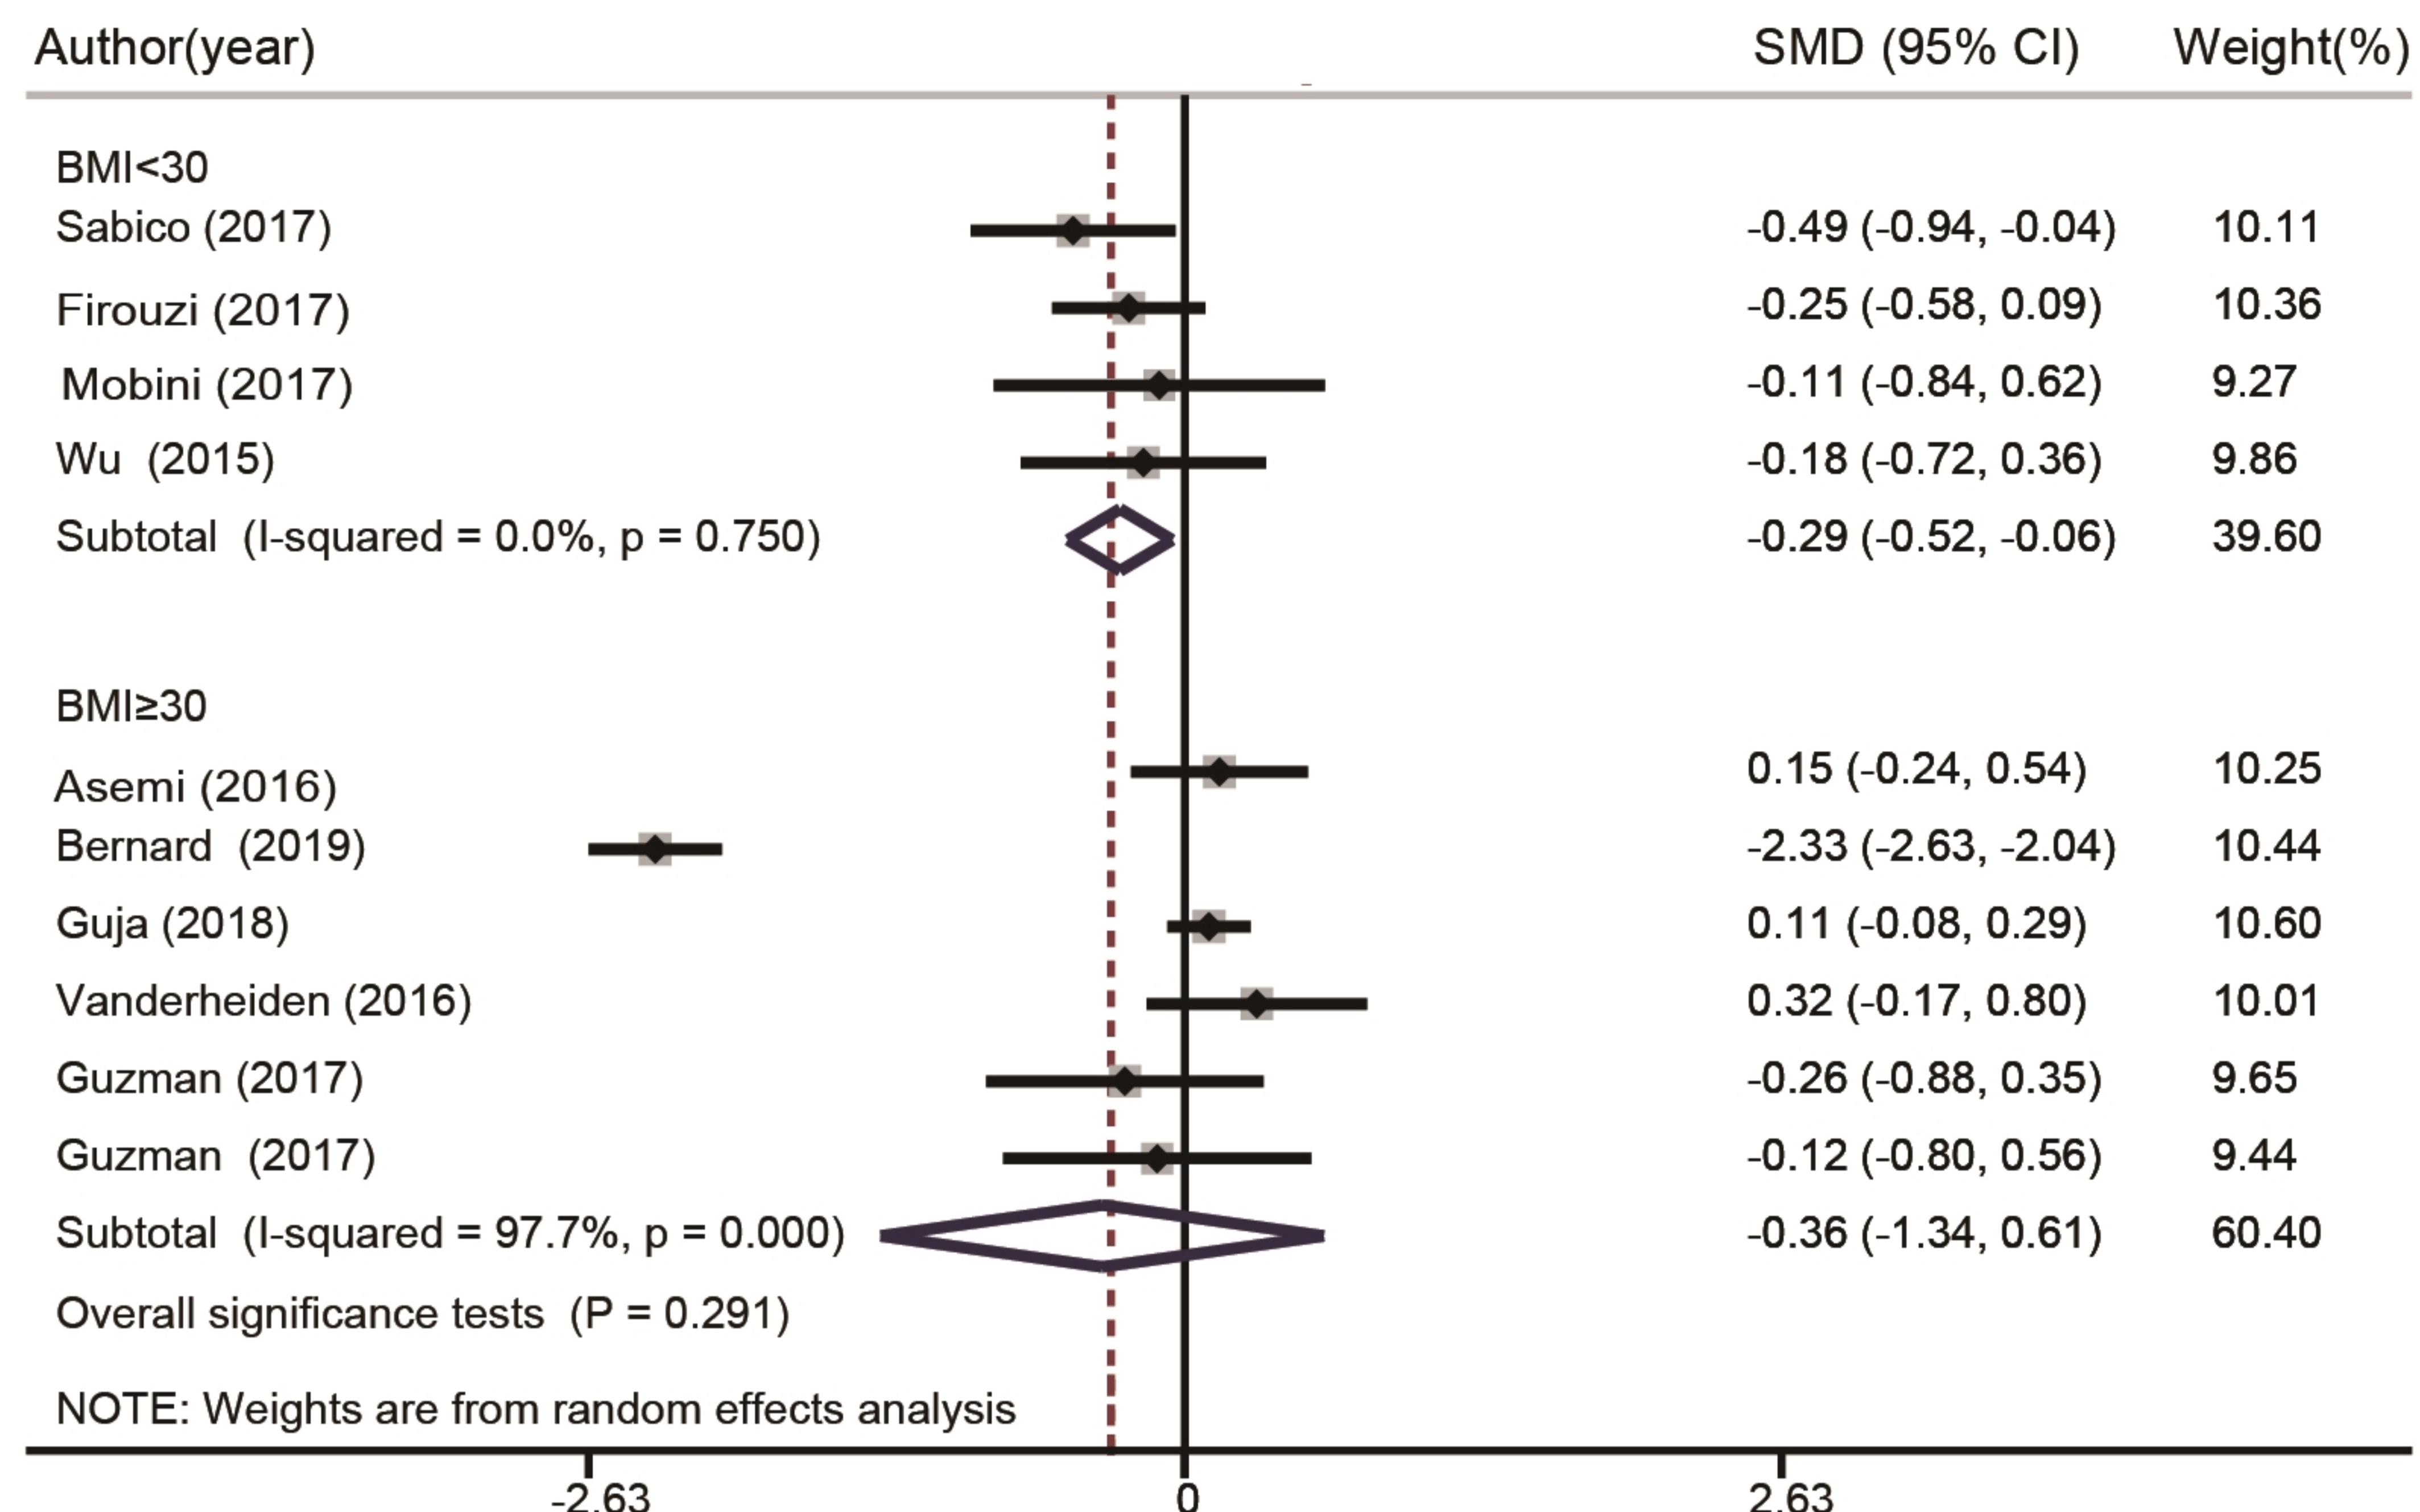

C

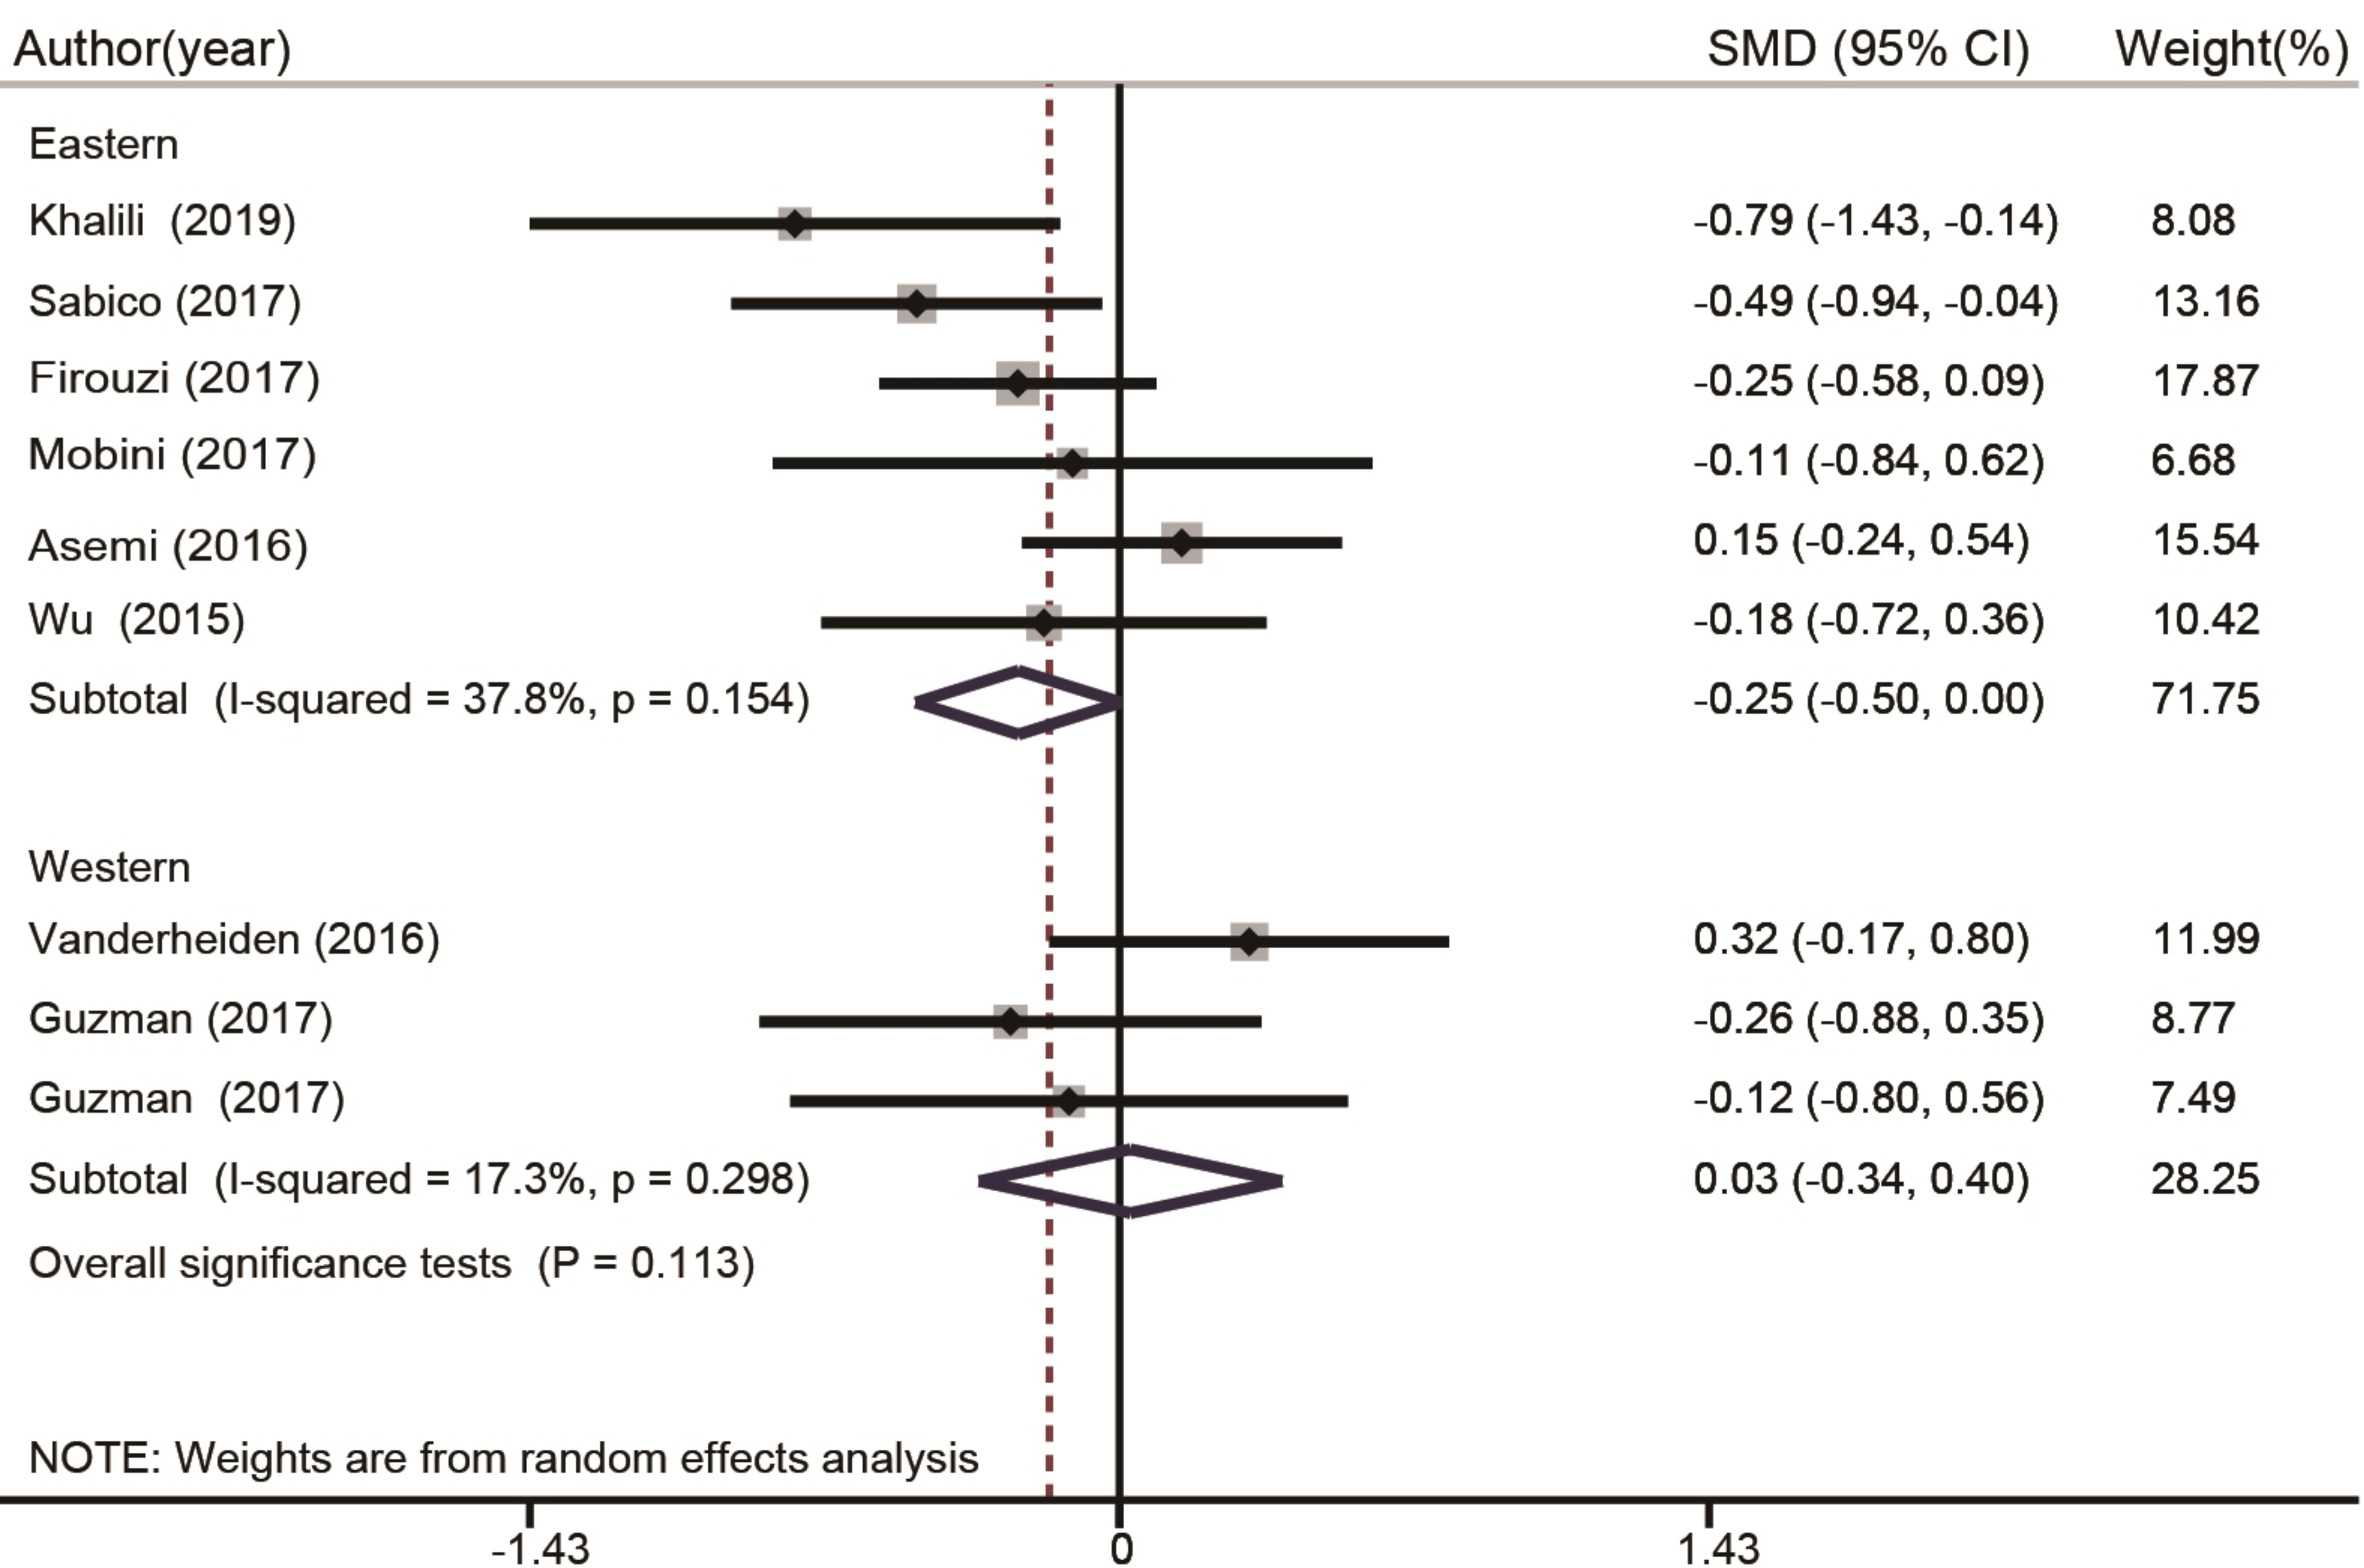

D

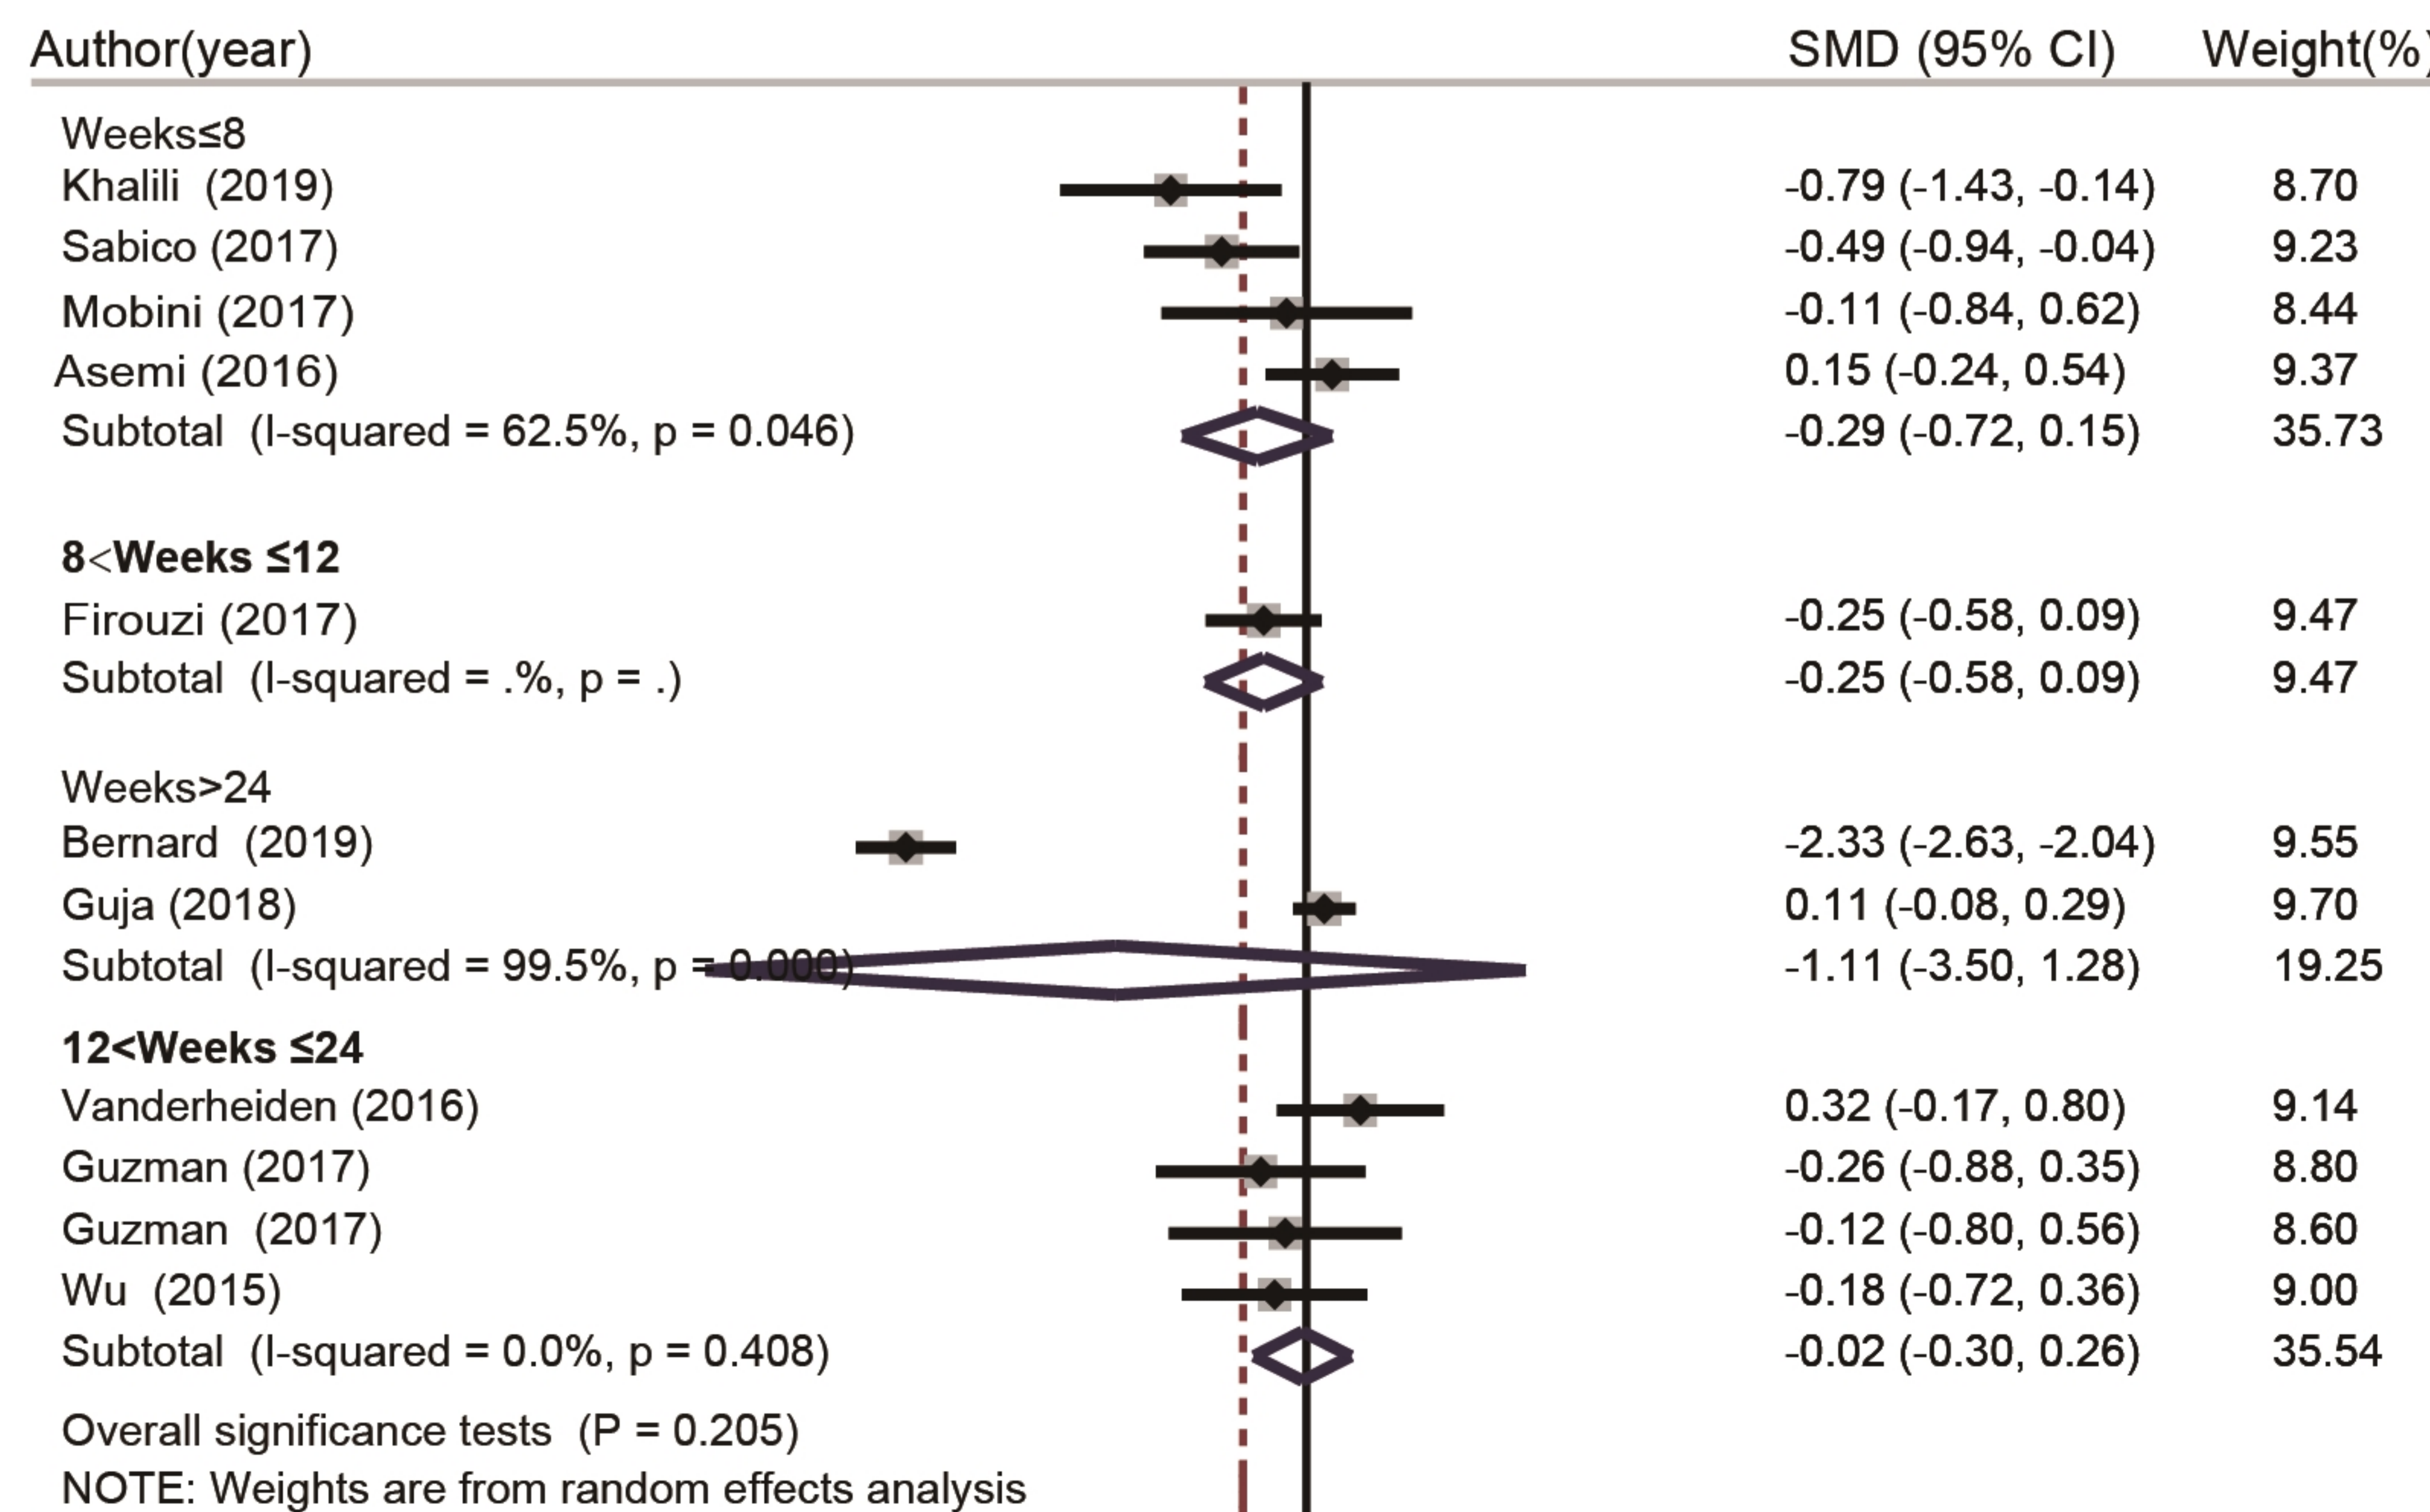

**A**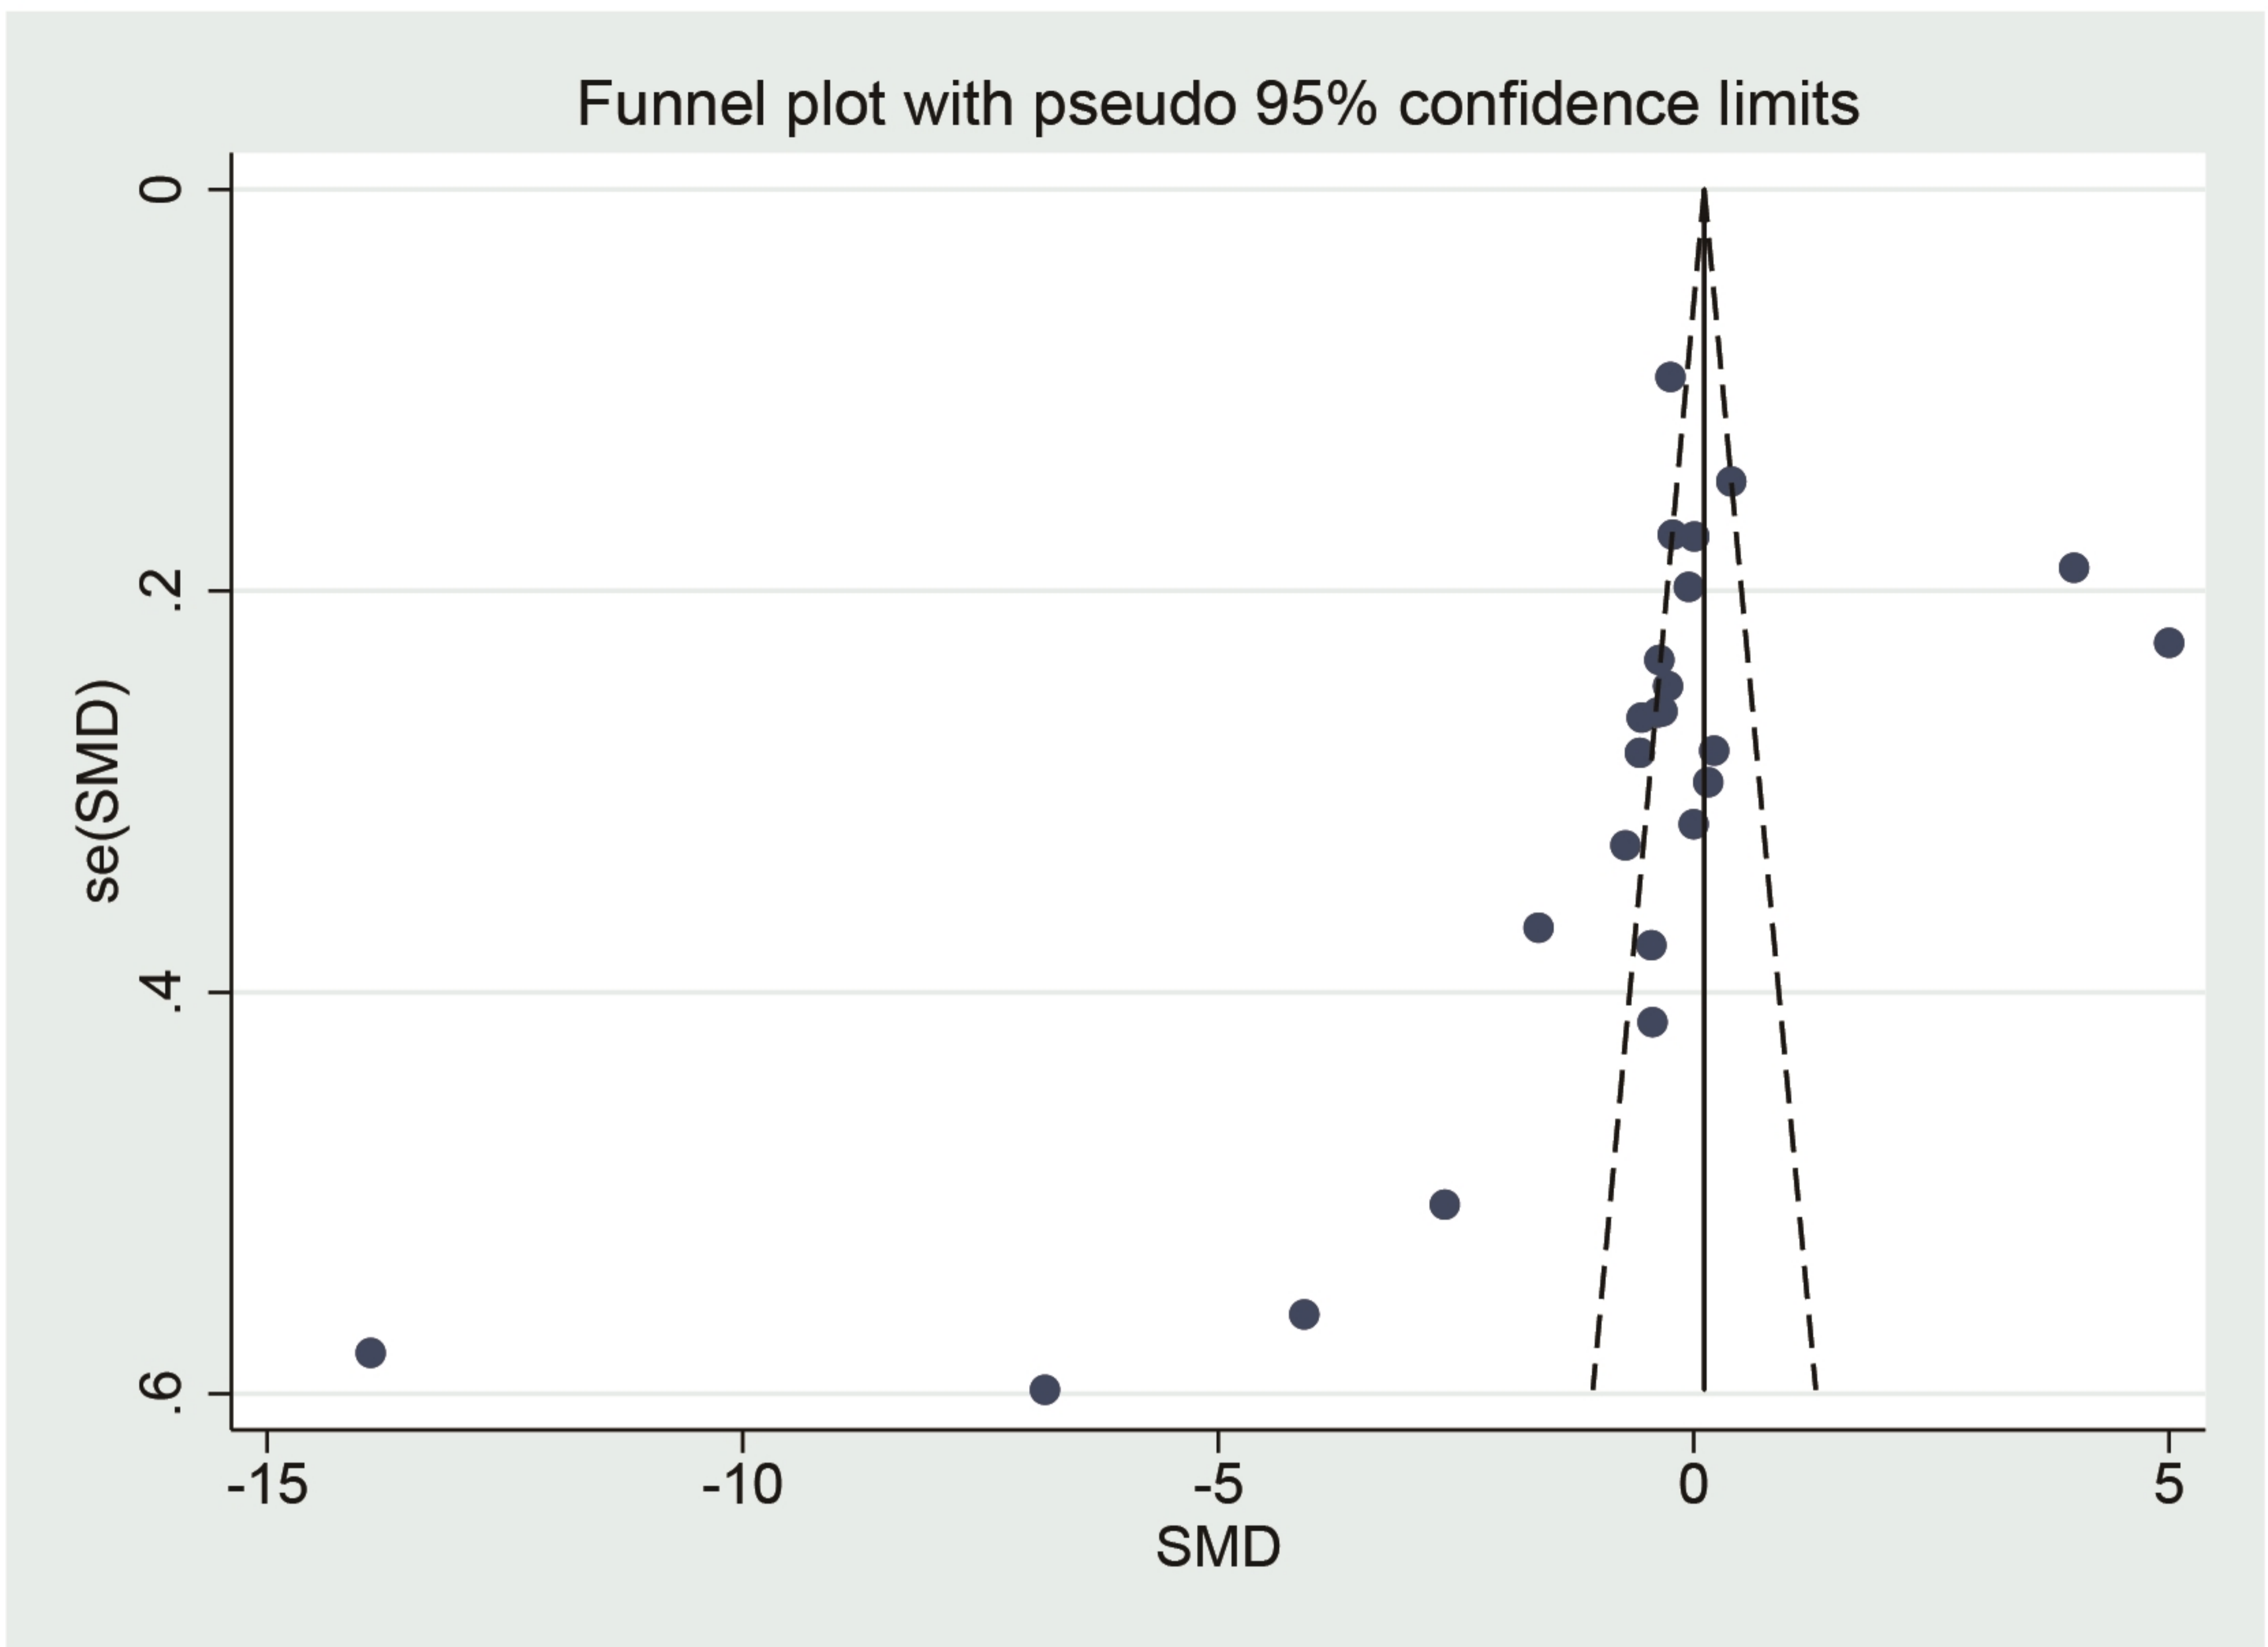**B**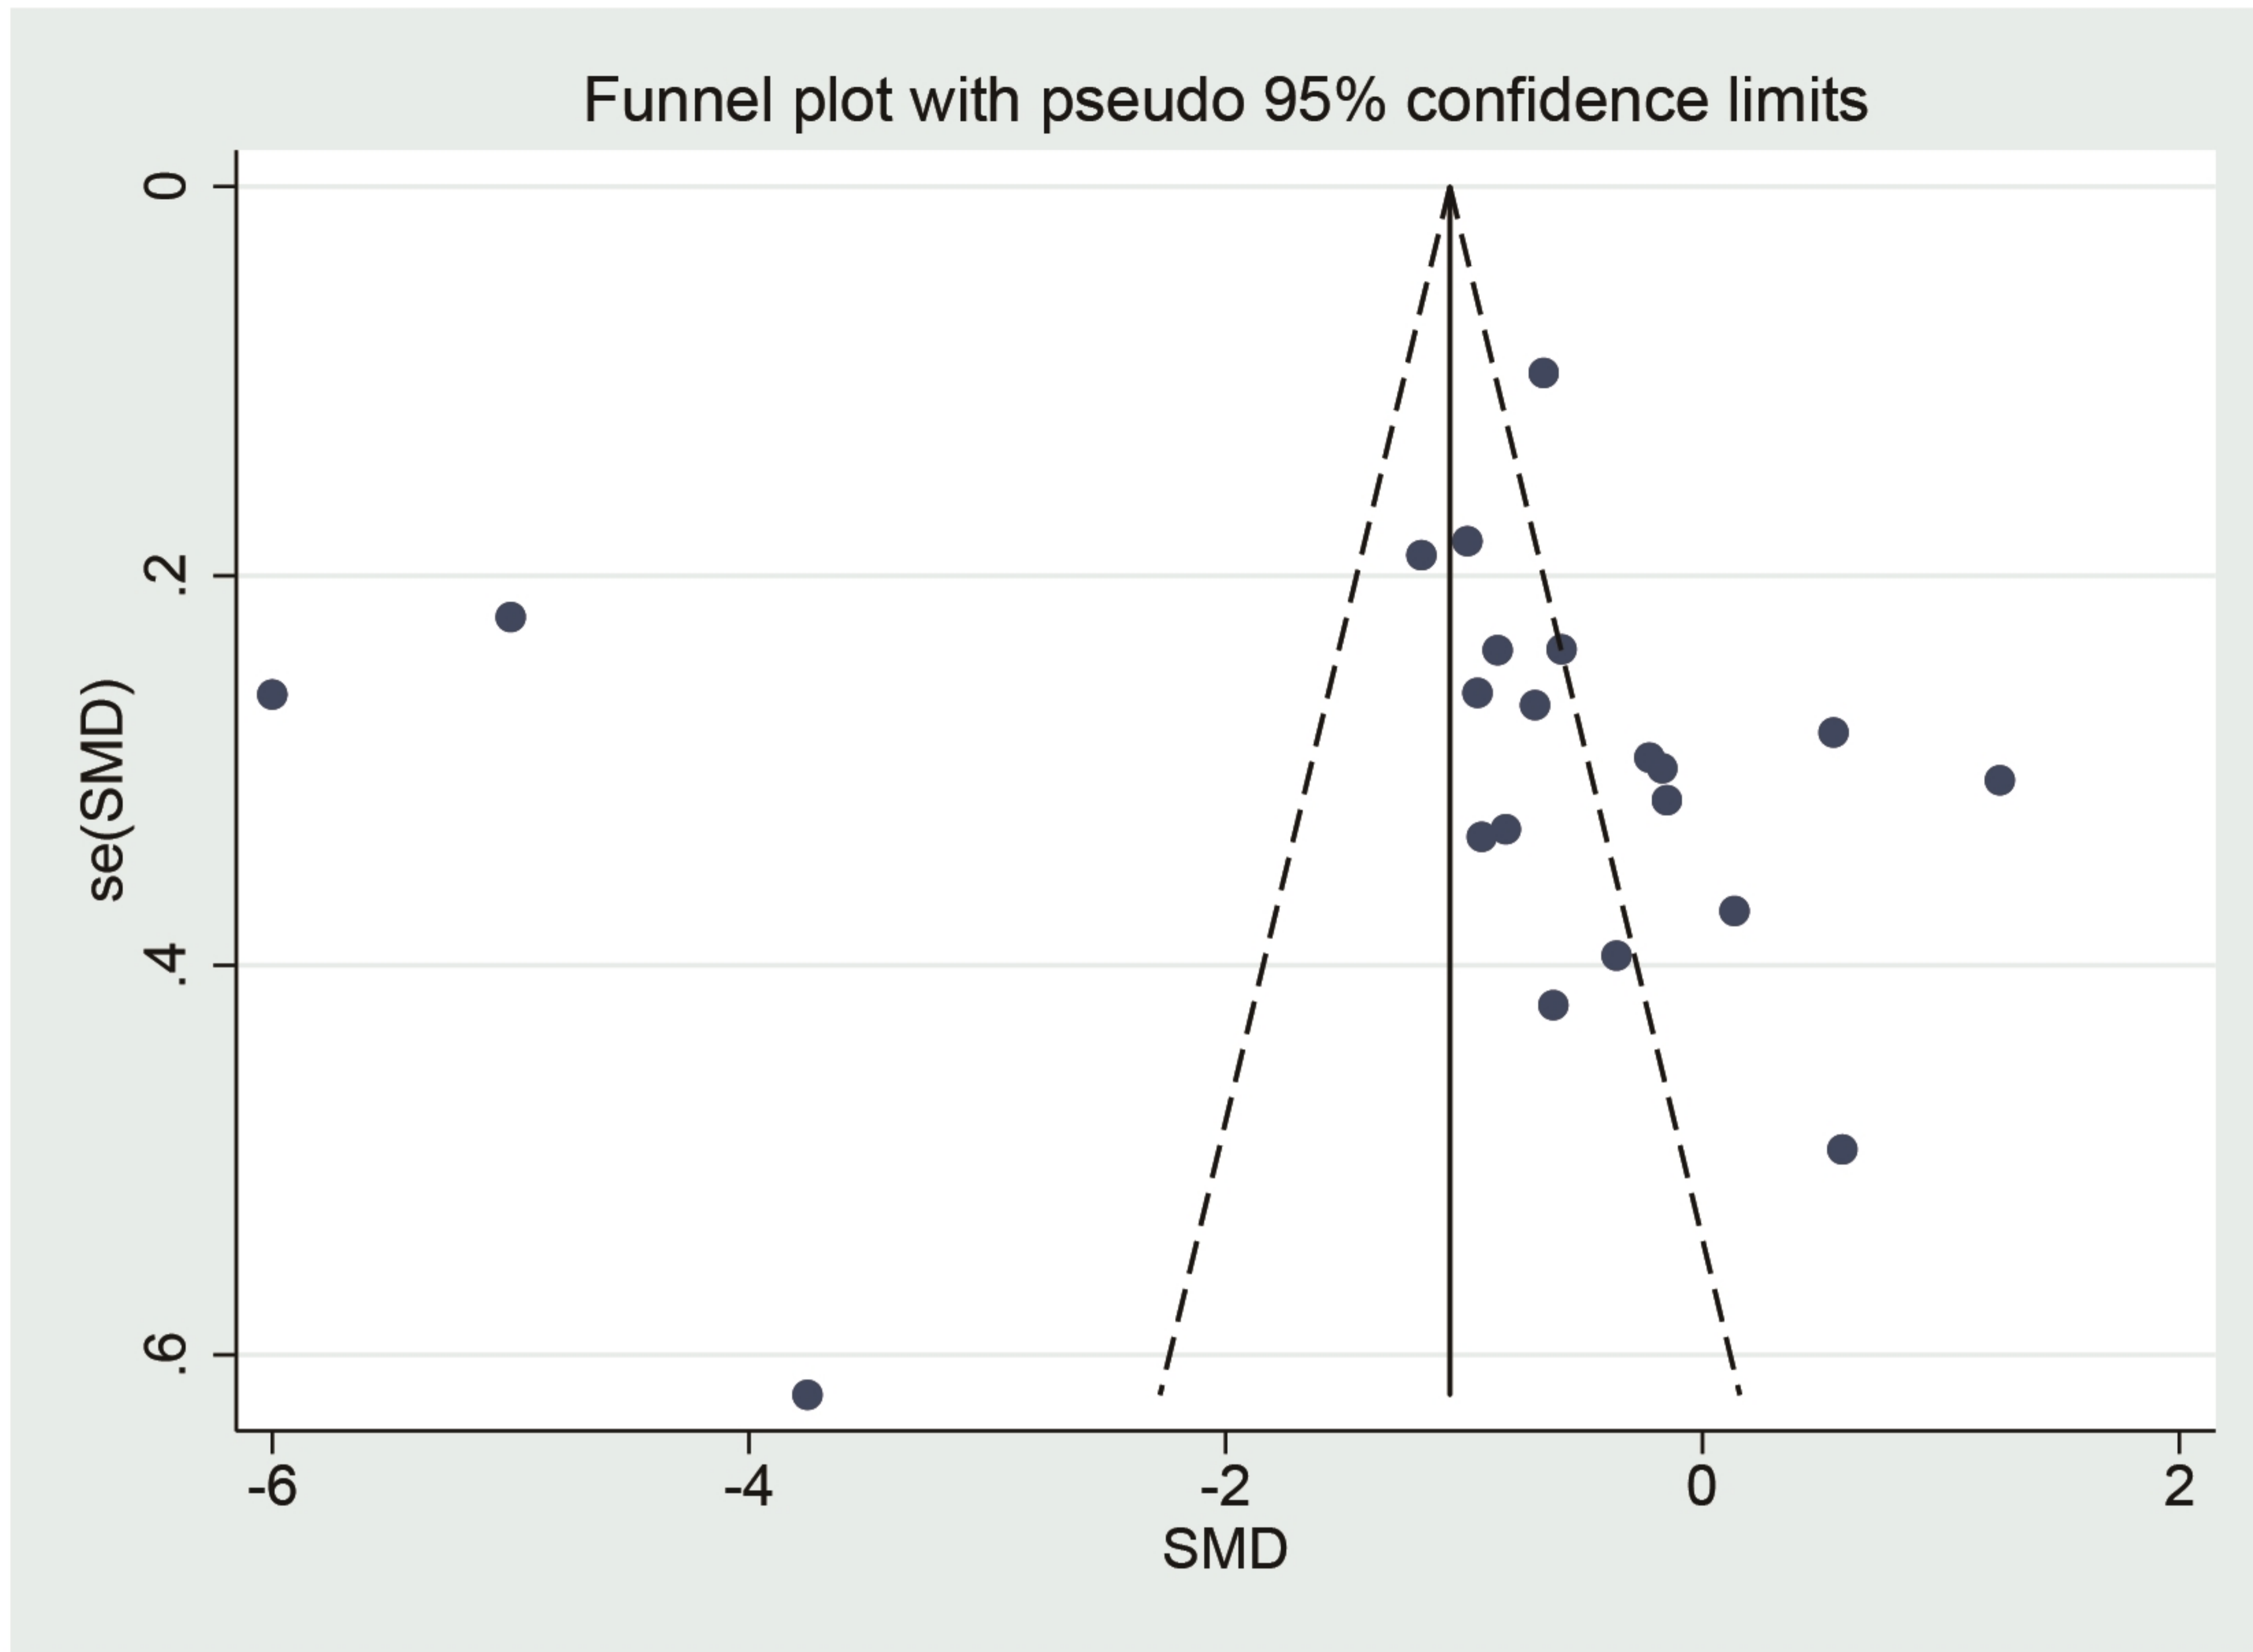**C**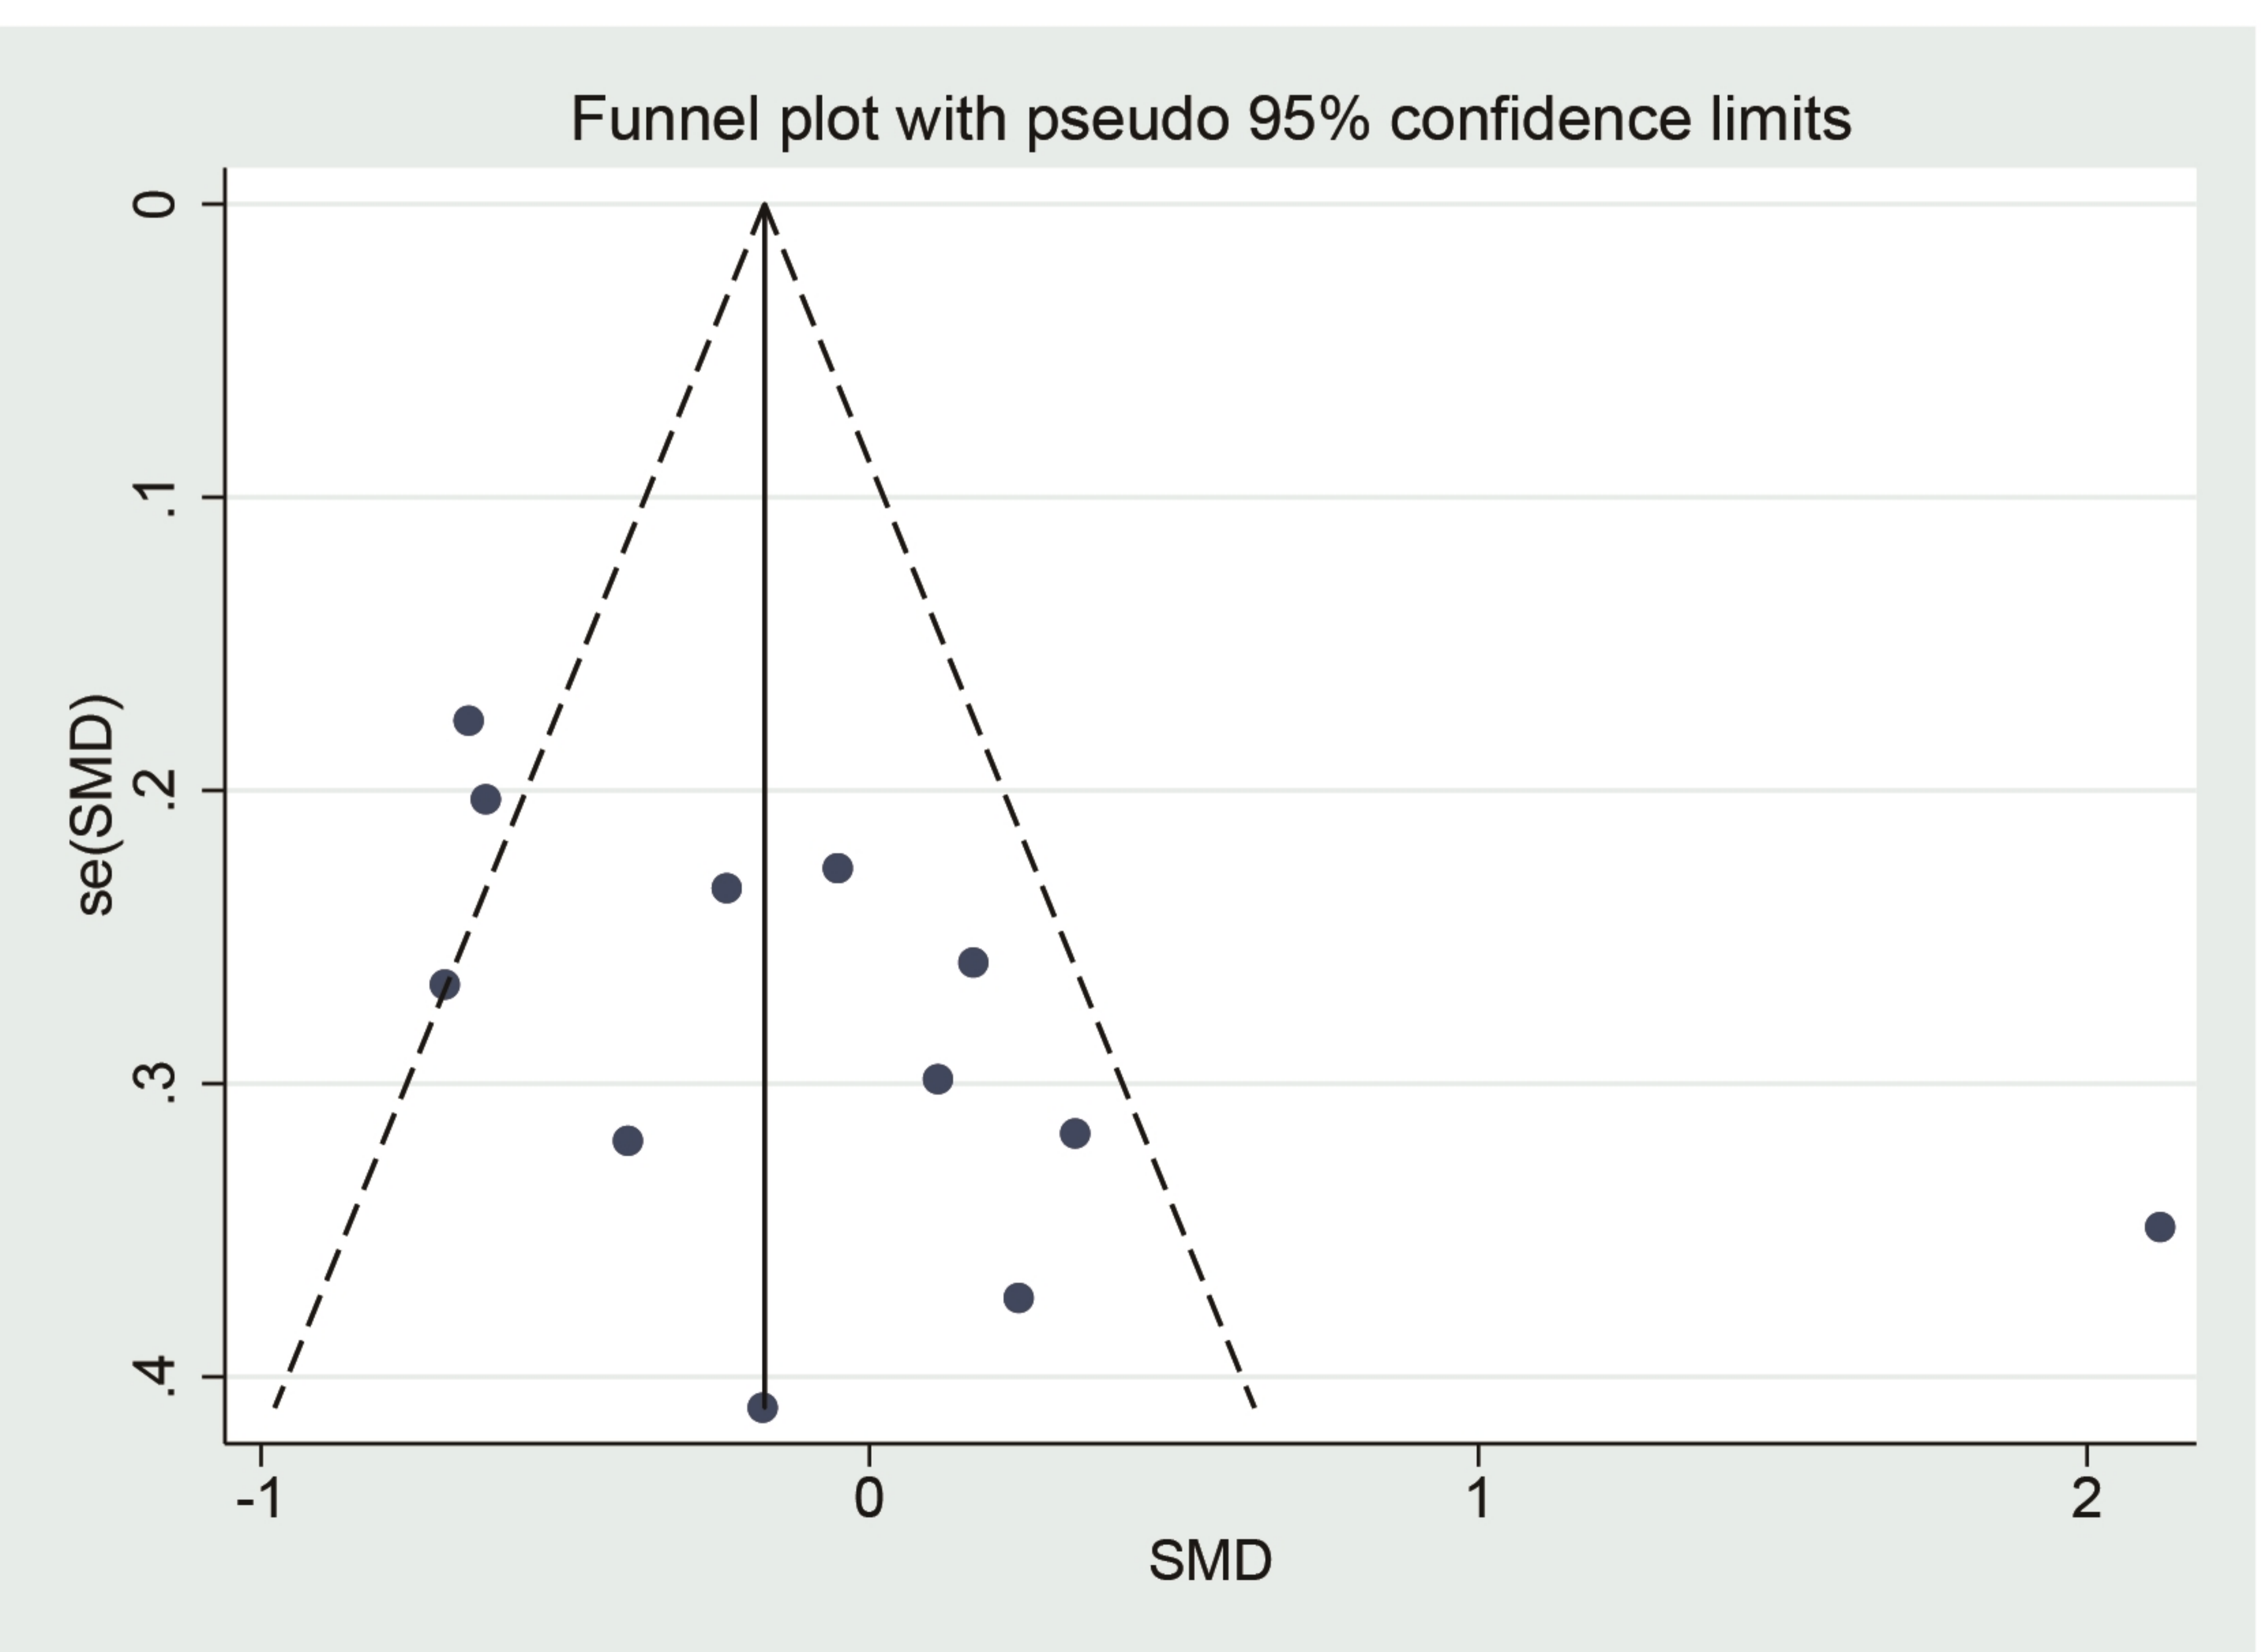**D**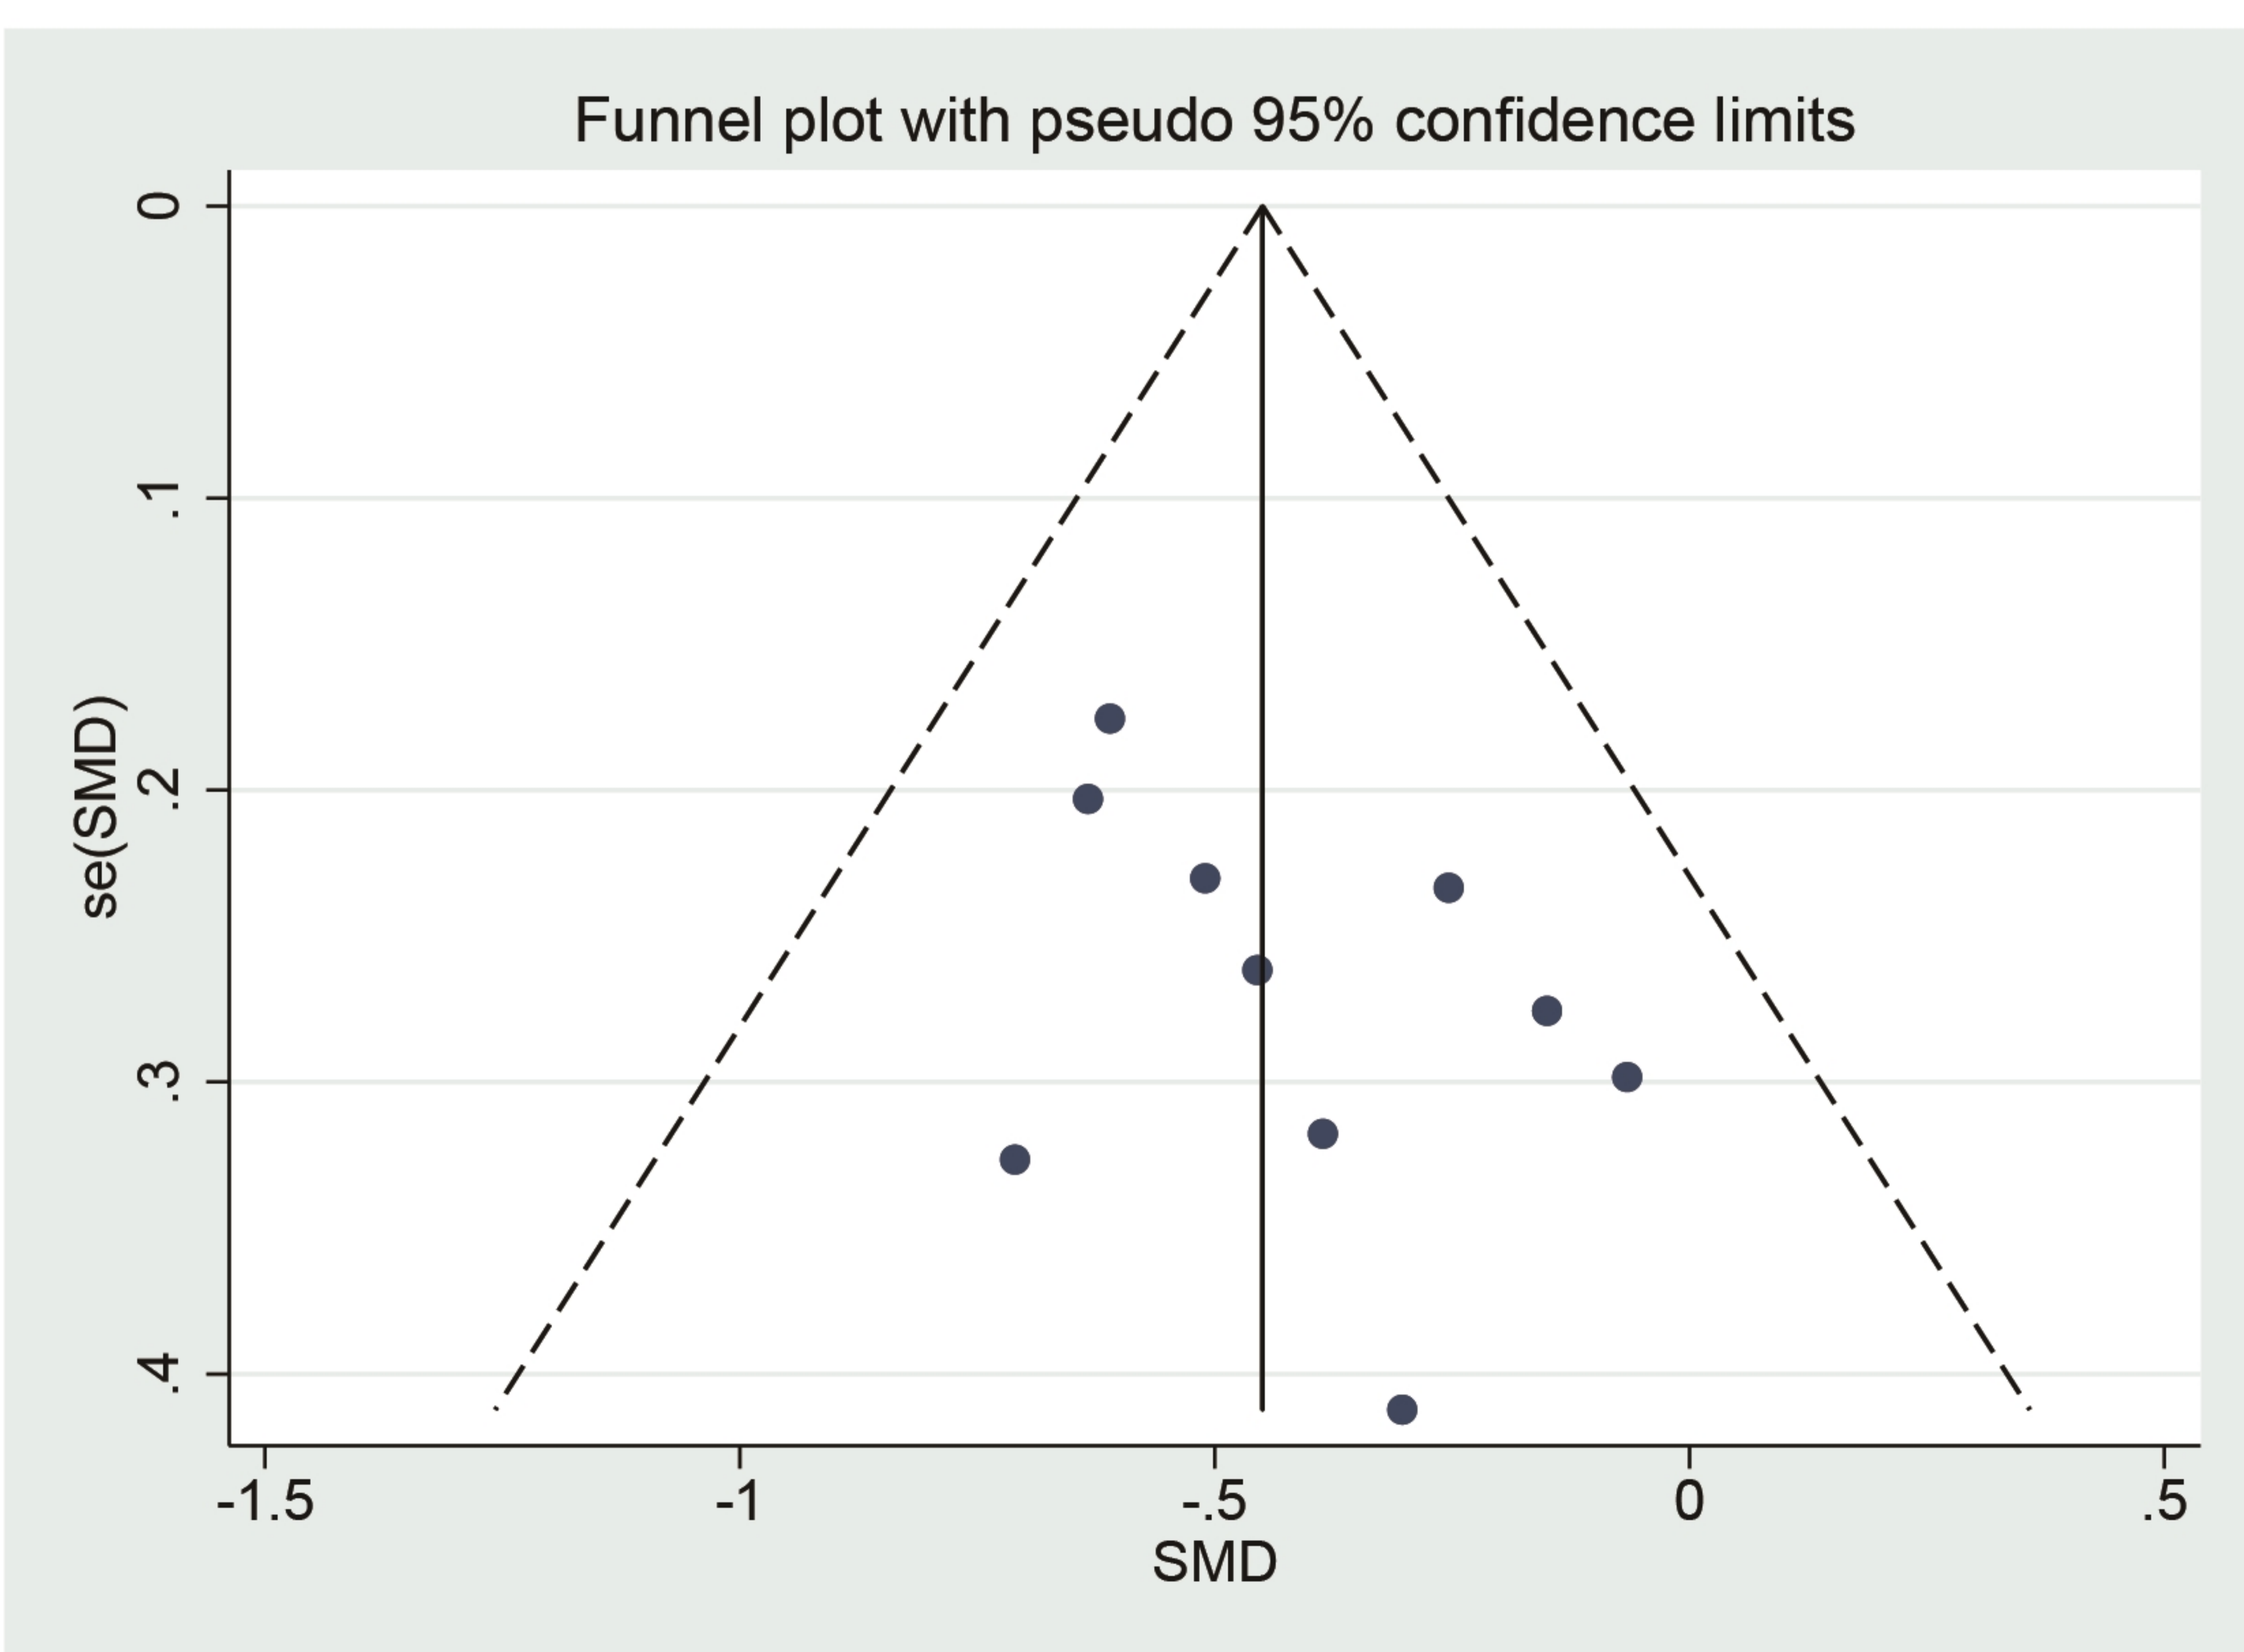

**A**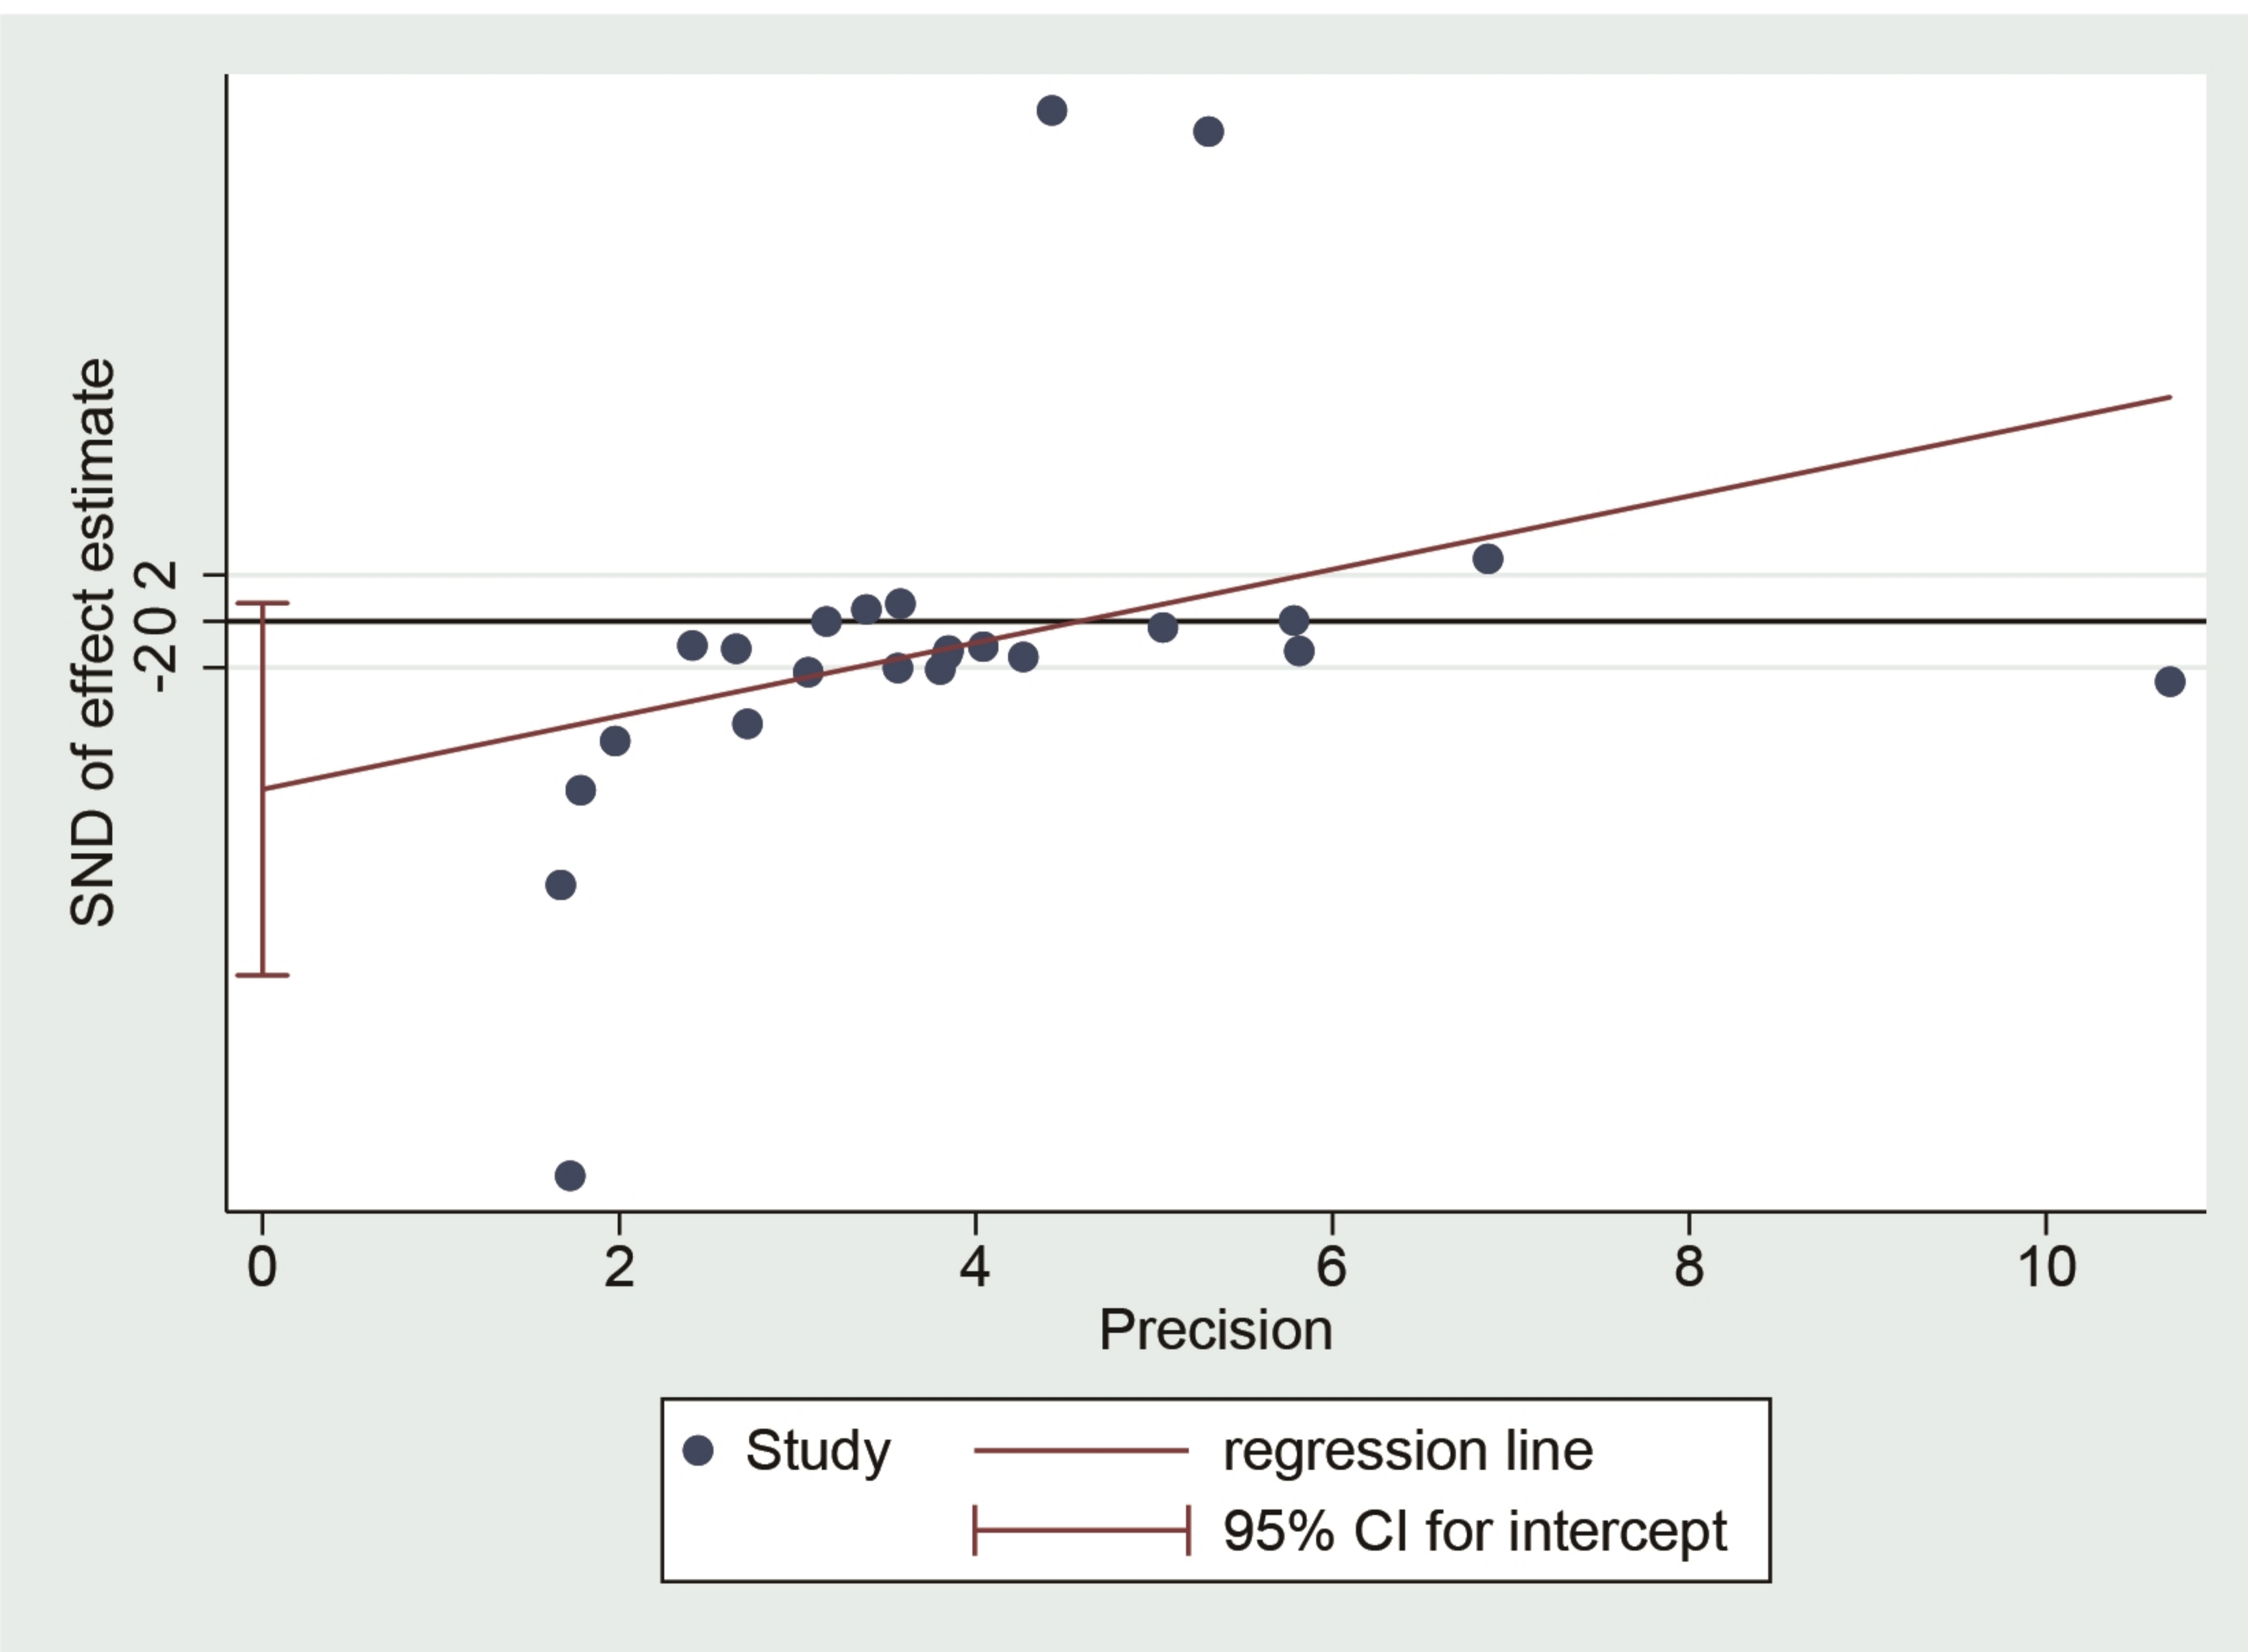**B**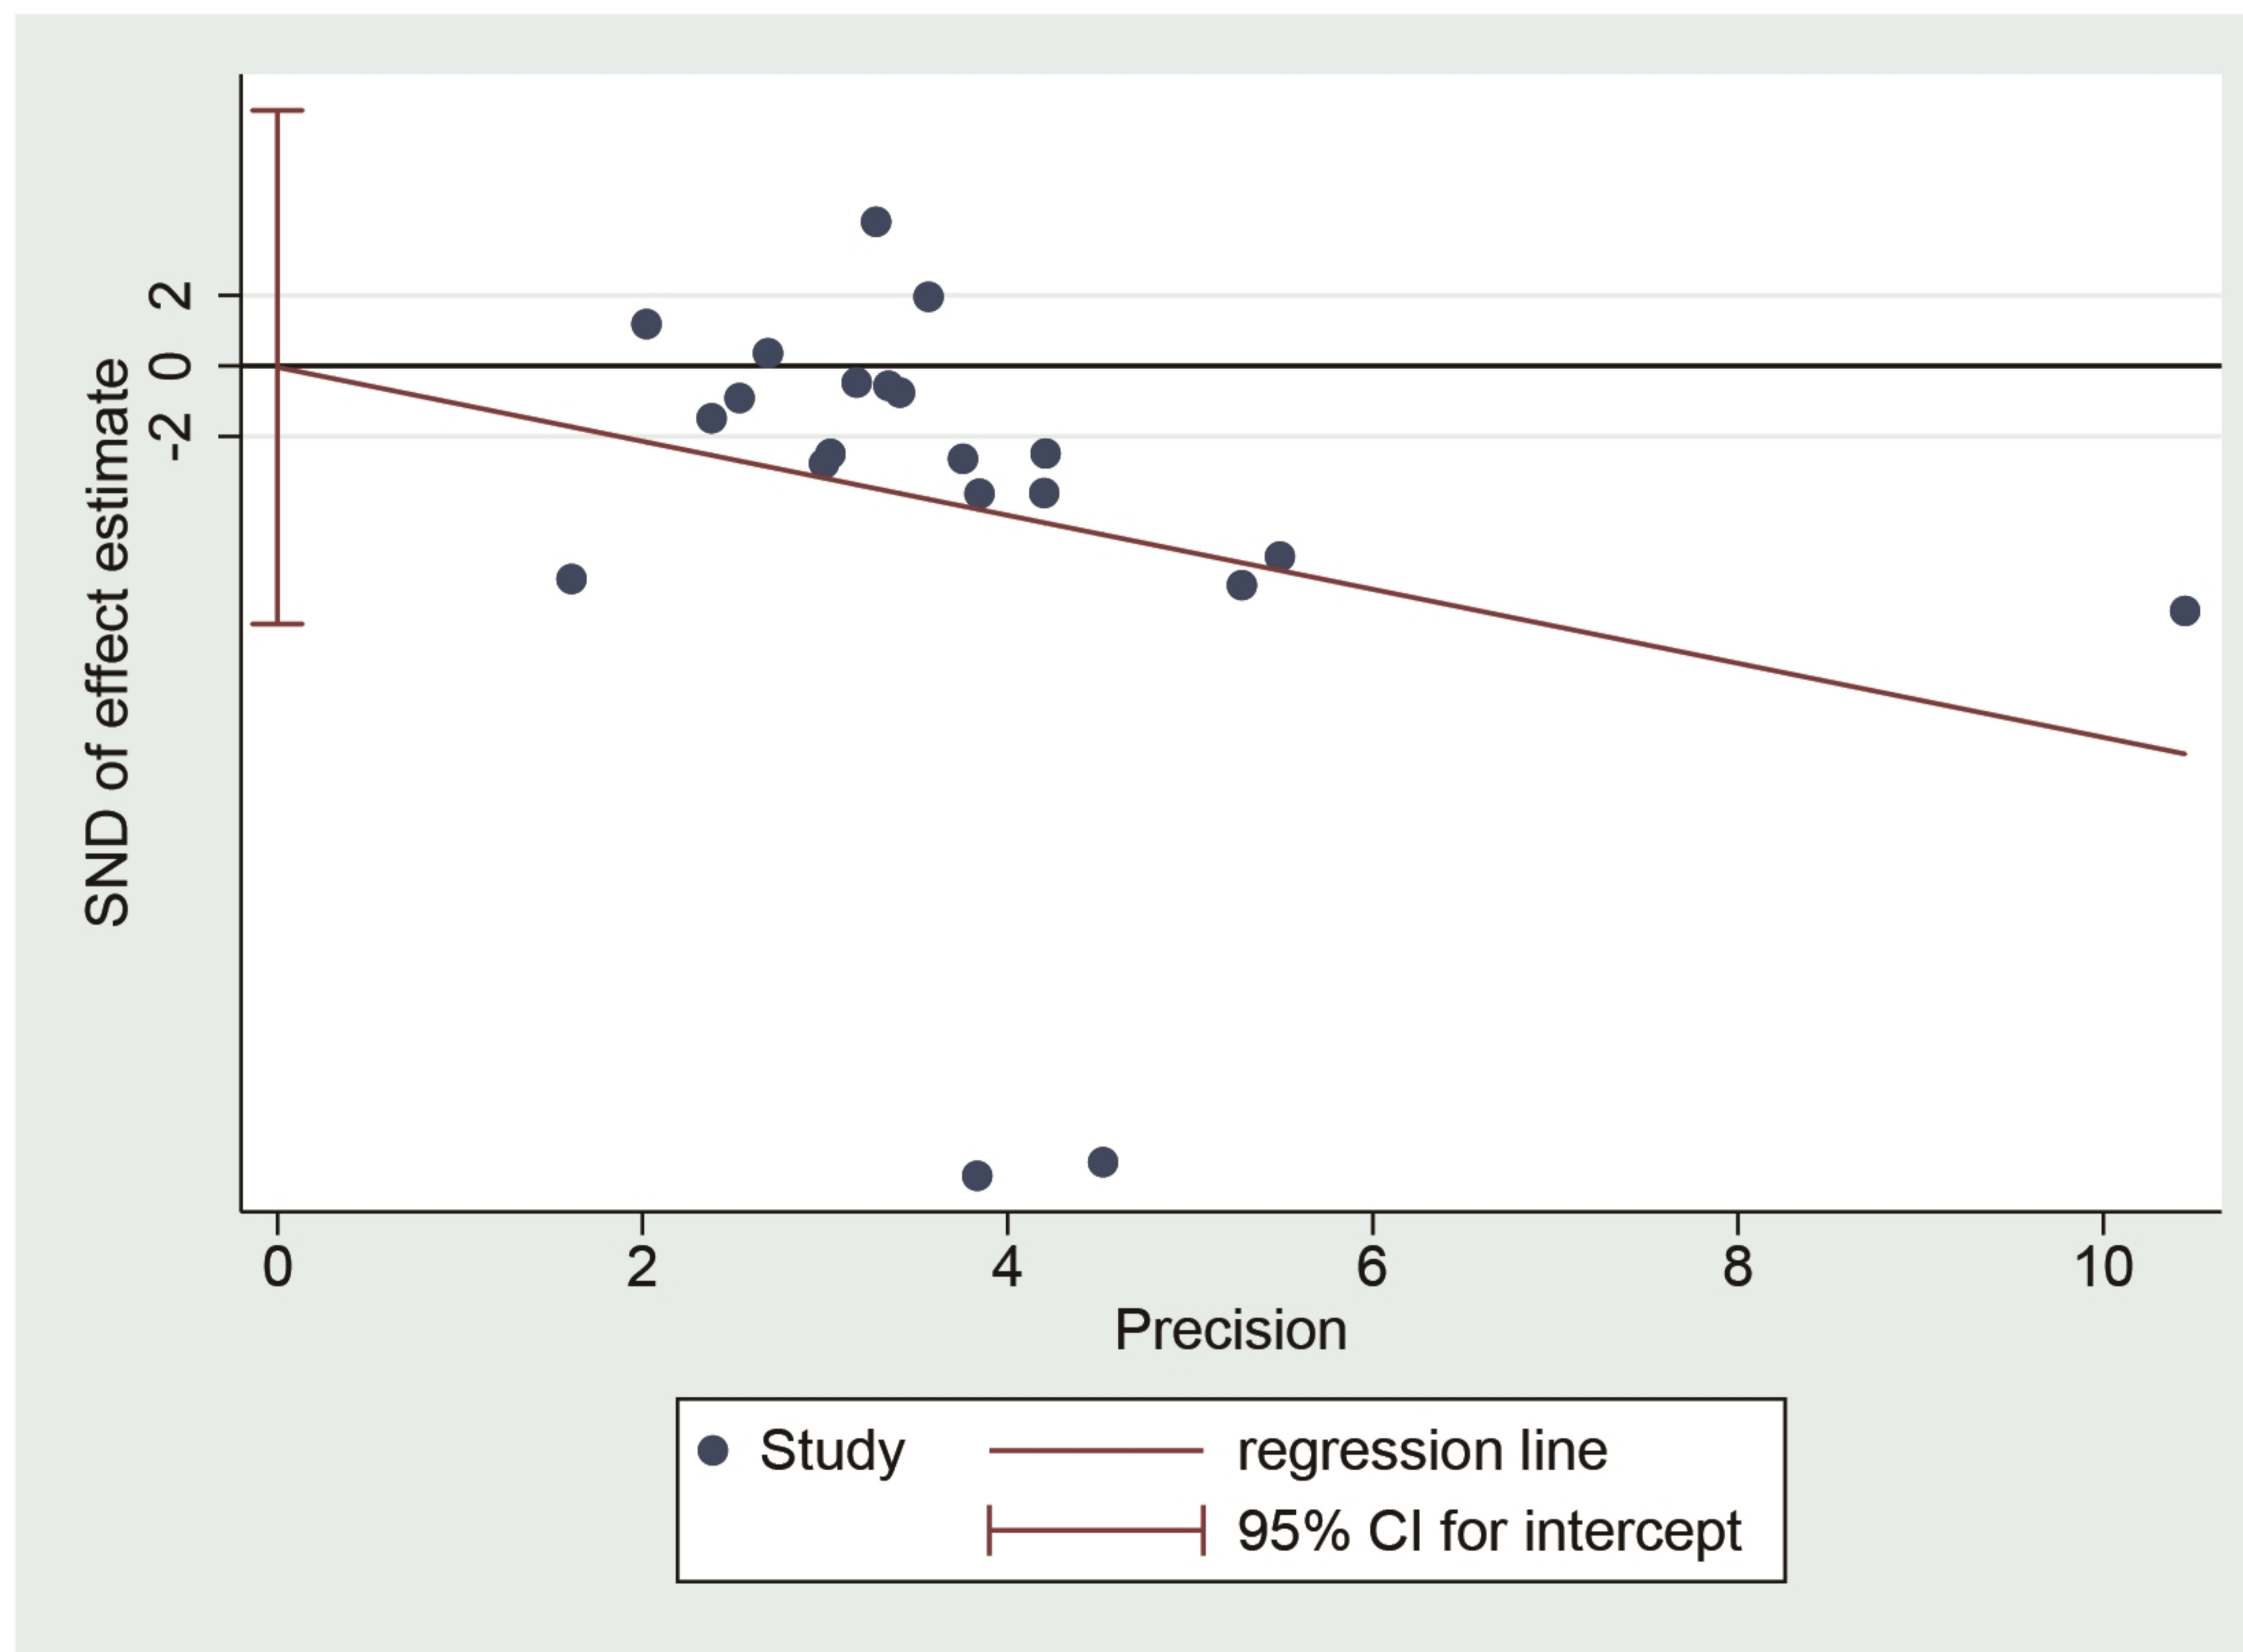**C**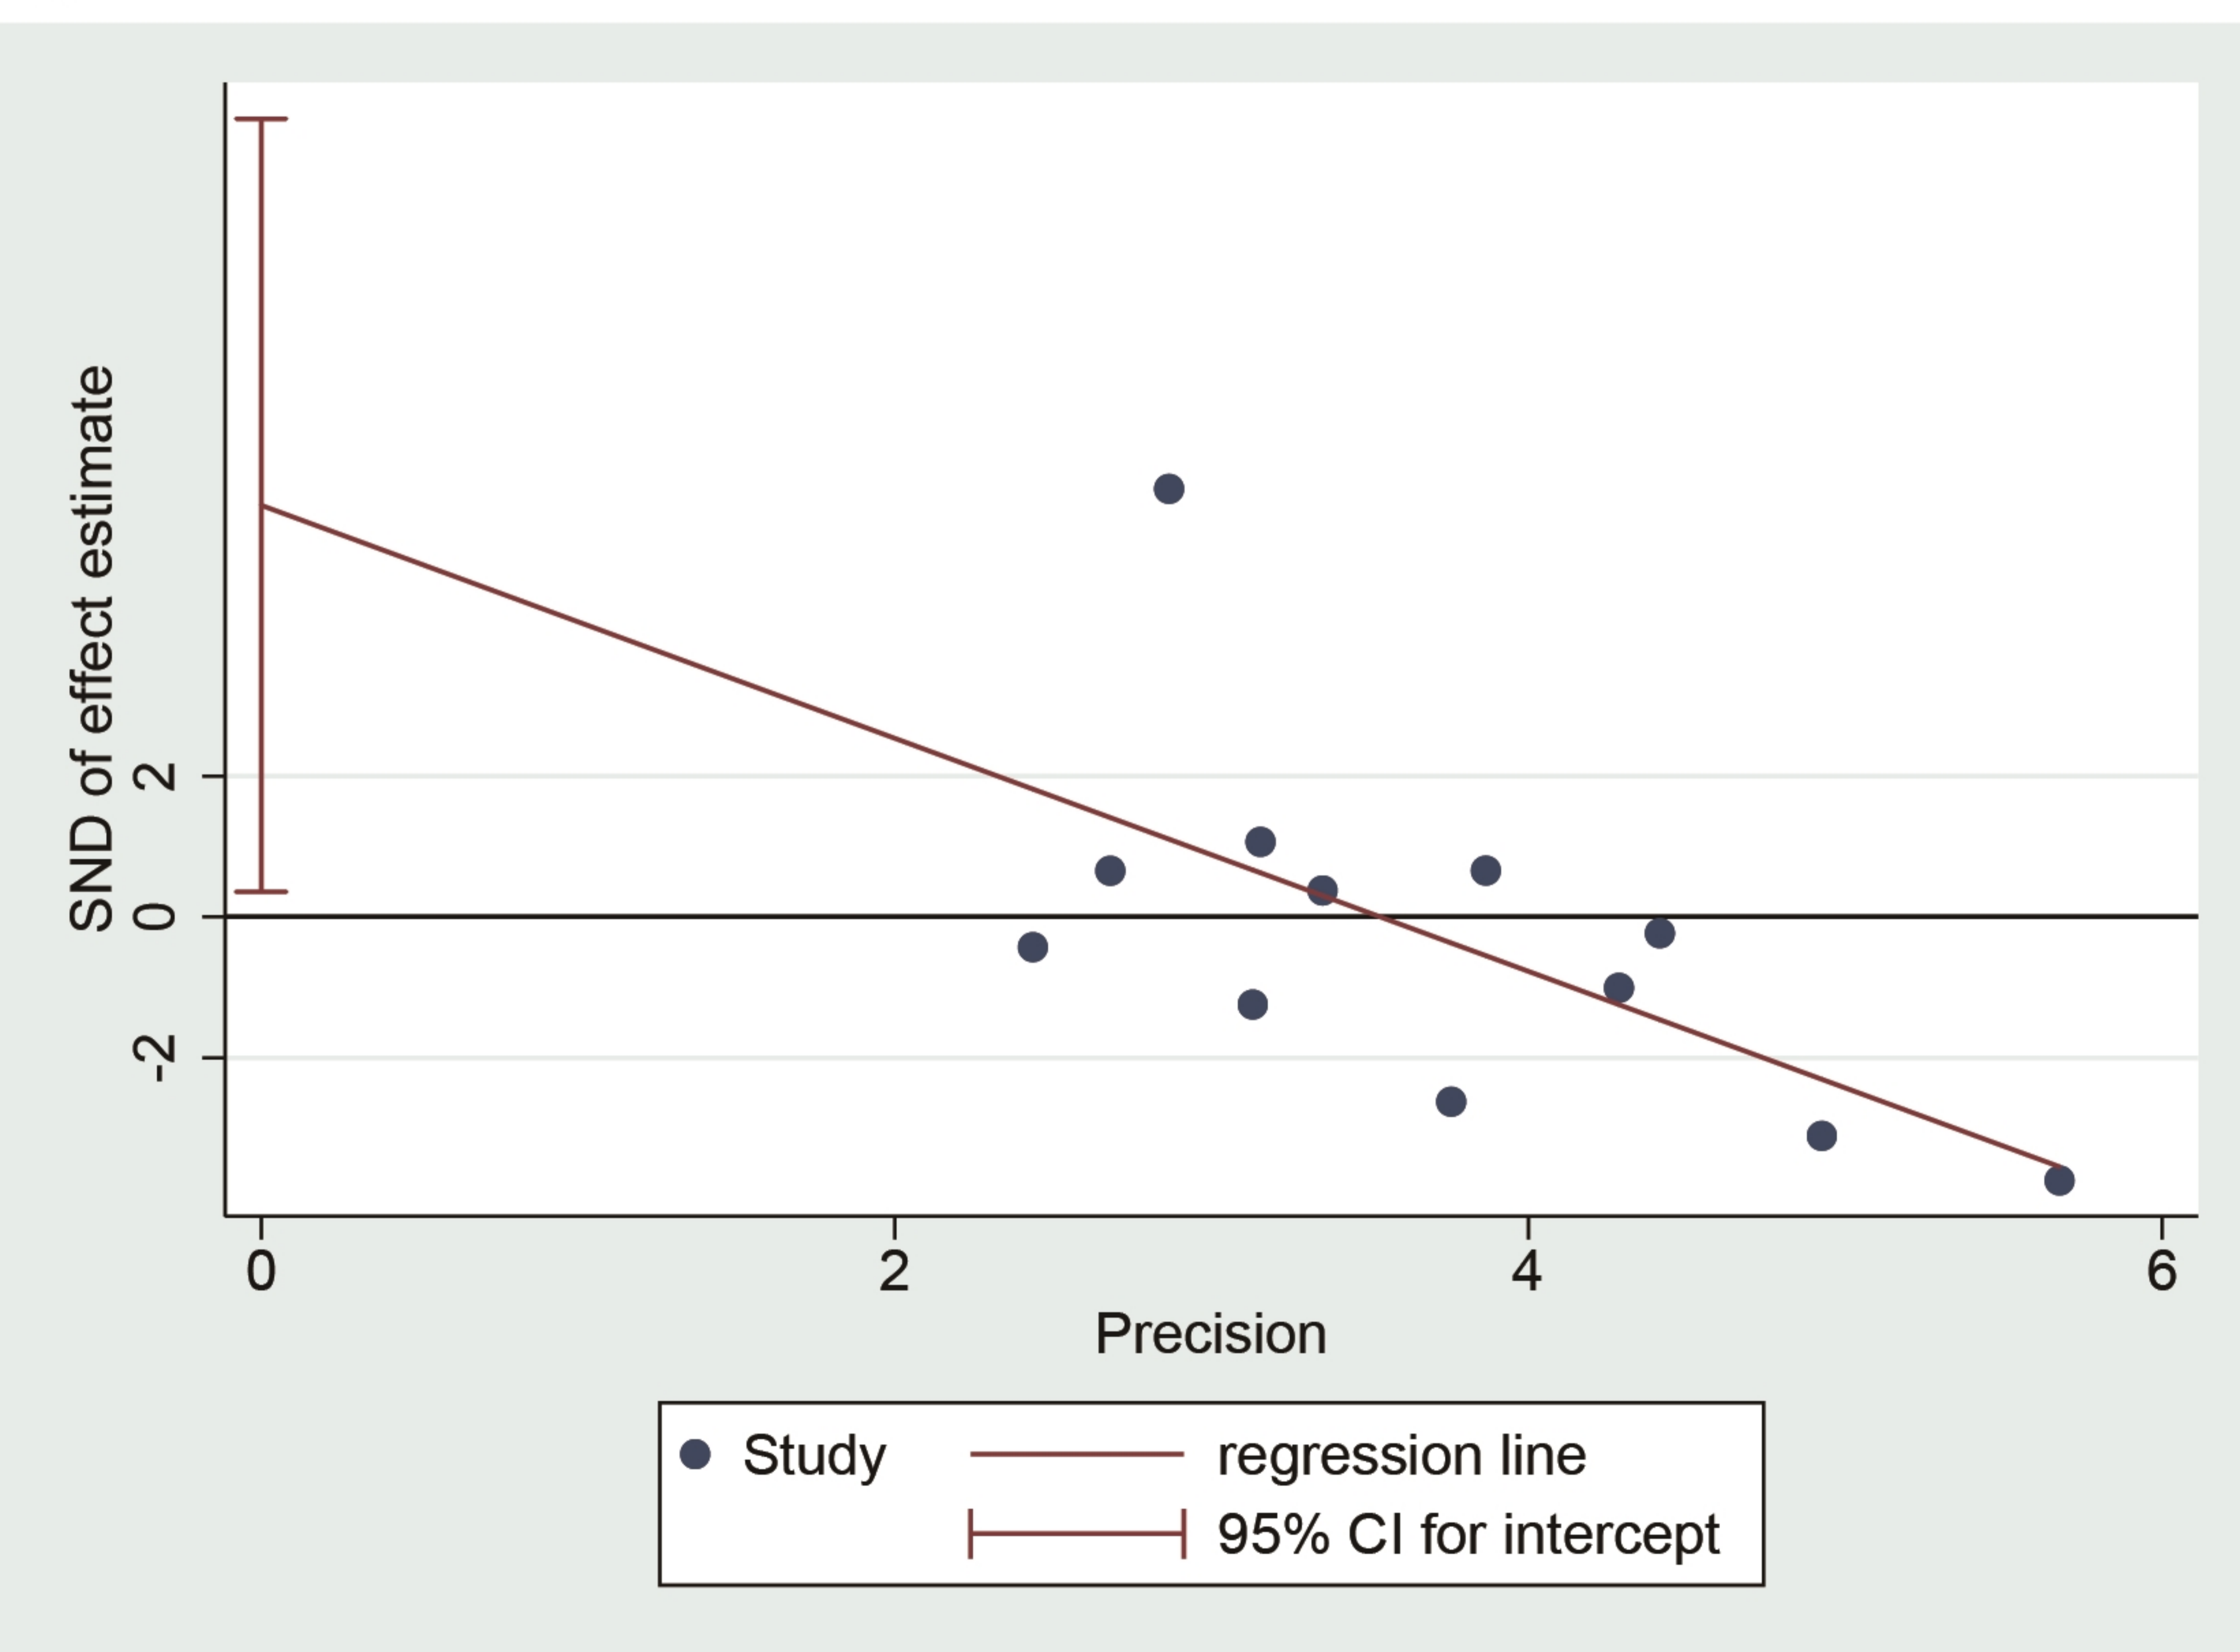**D**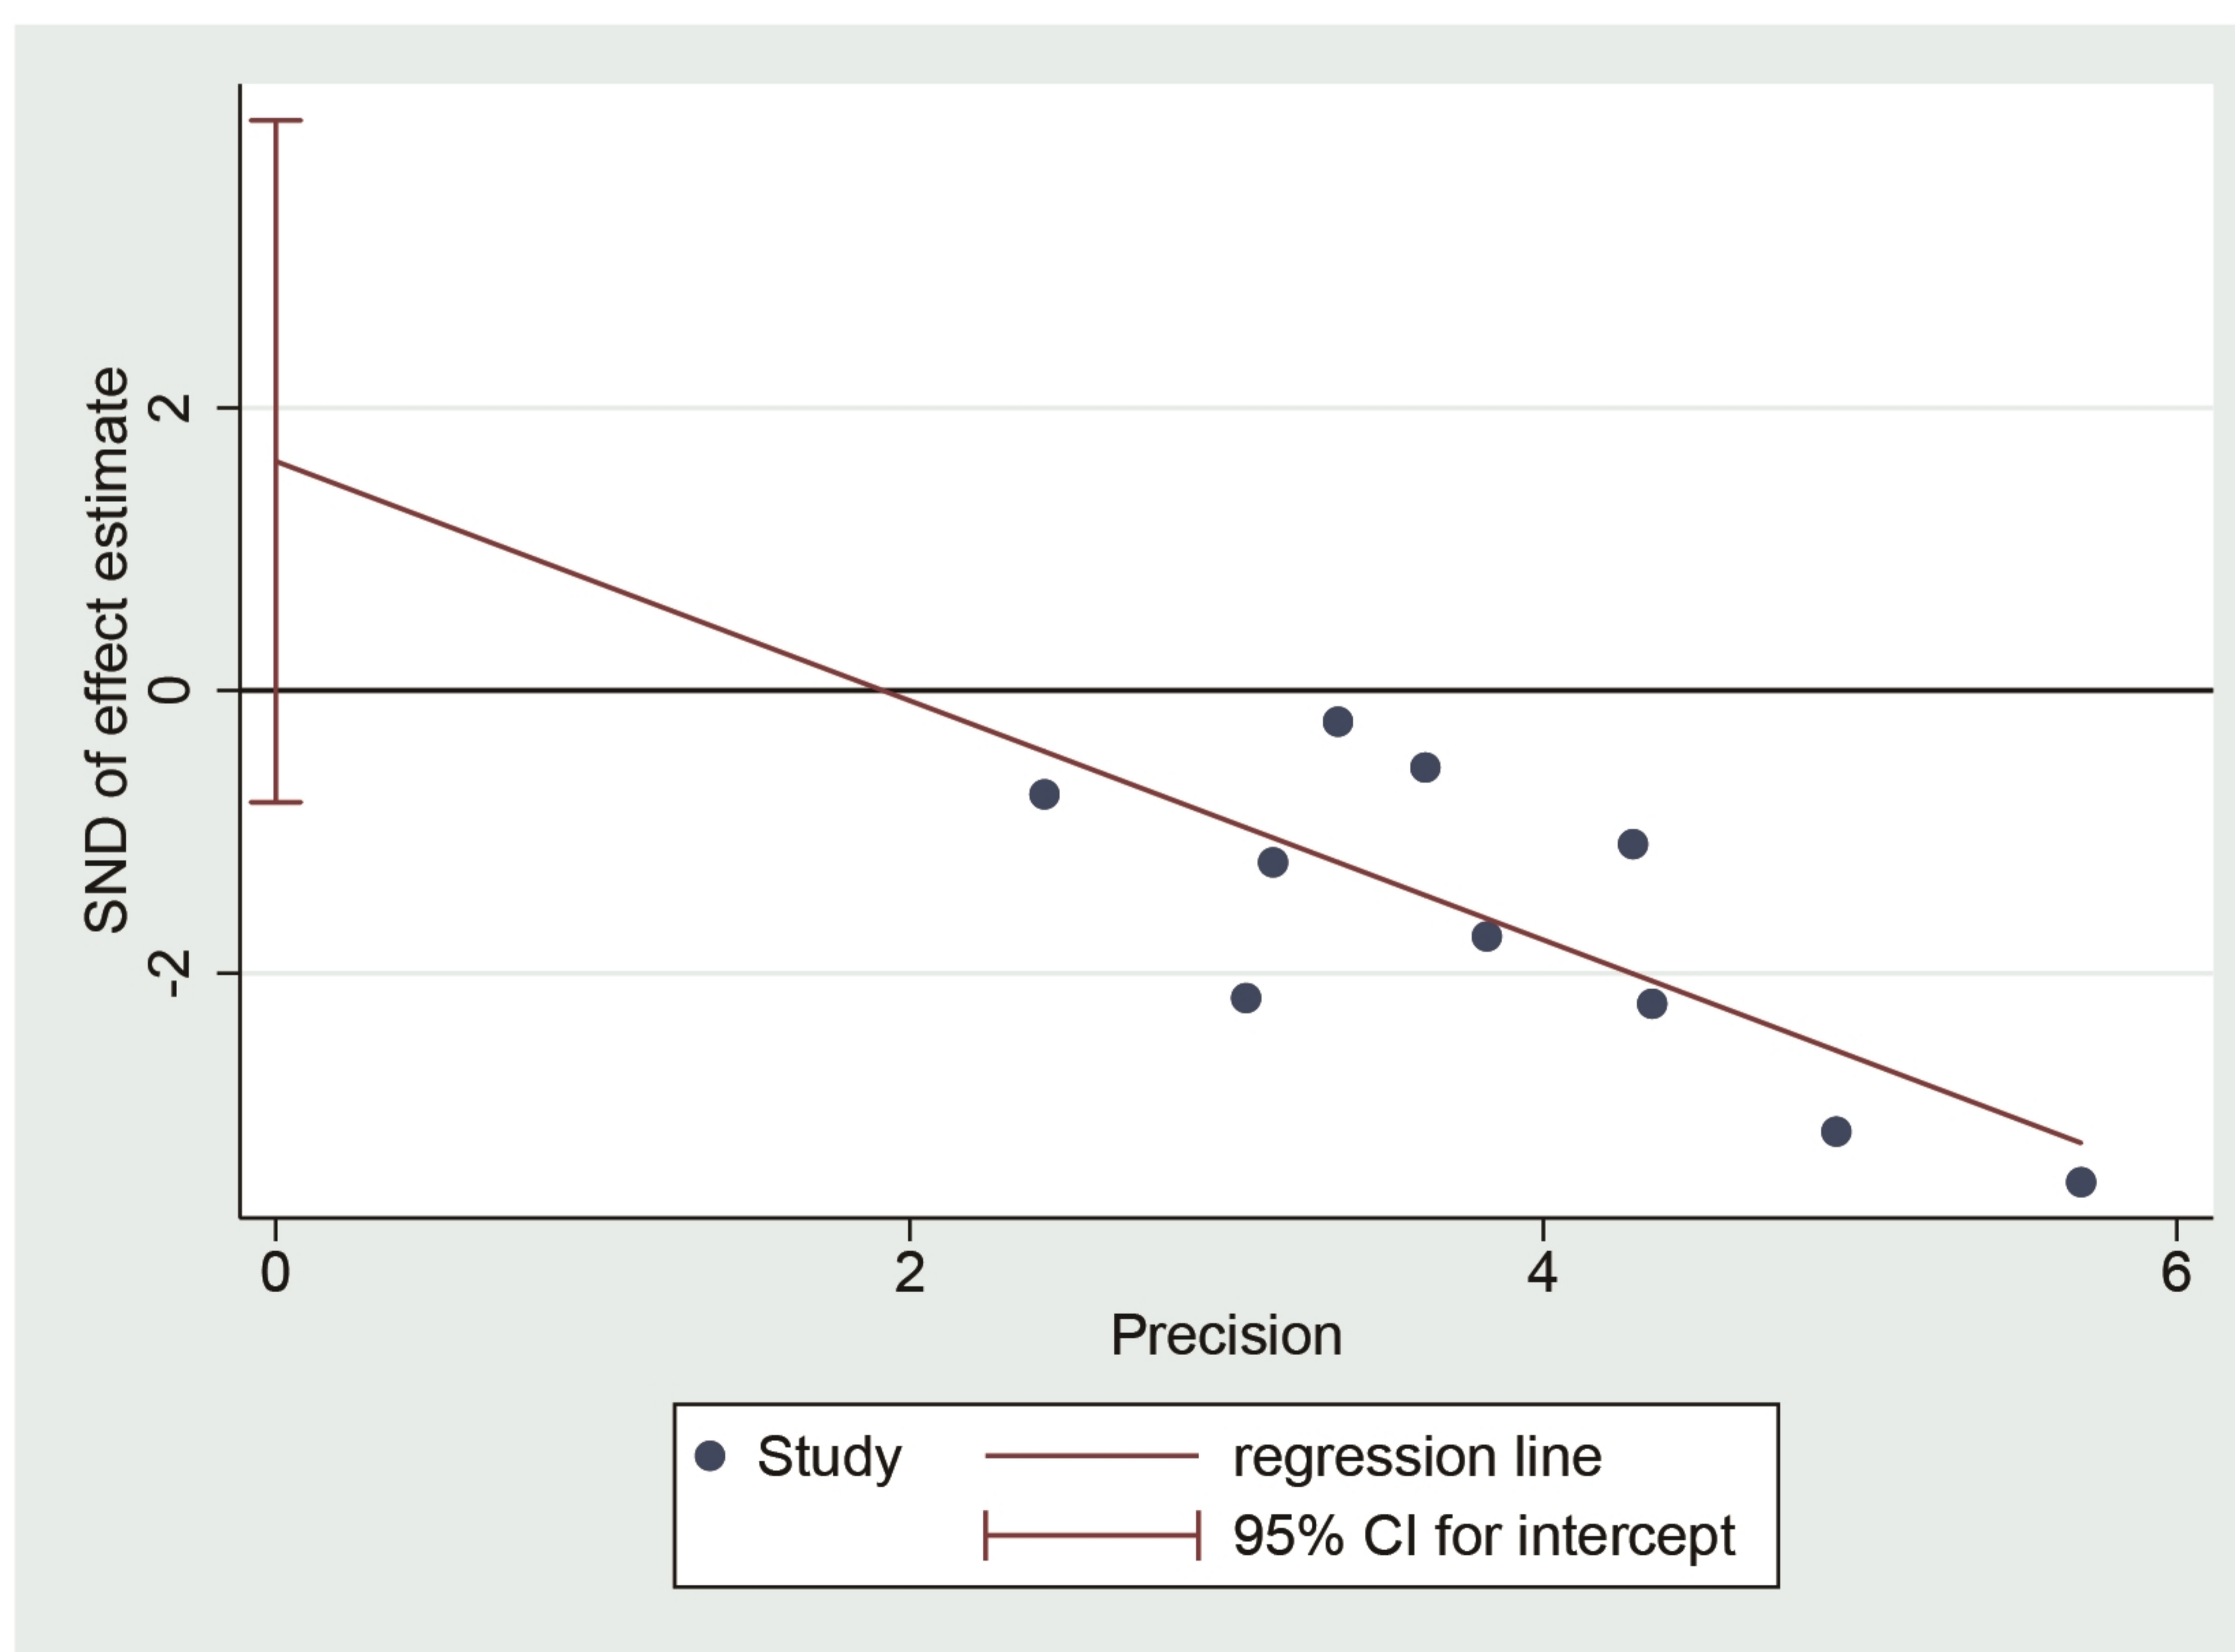

Note: A\_metabias\_ES\_seES, egger(p=0.075); B\_metabias\_ES\_seES, egger(p=0.991)  
 C\_metabias\_ES\_seES, egger(p=0.039); D\_metabias\_ES\_seES, egger(p=0.160)

**A**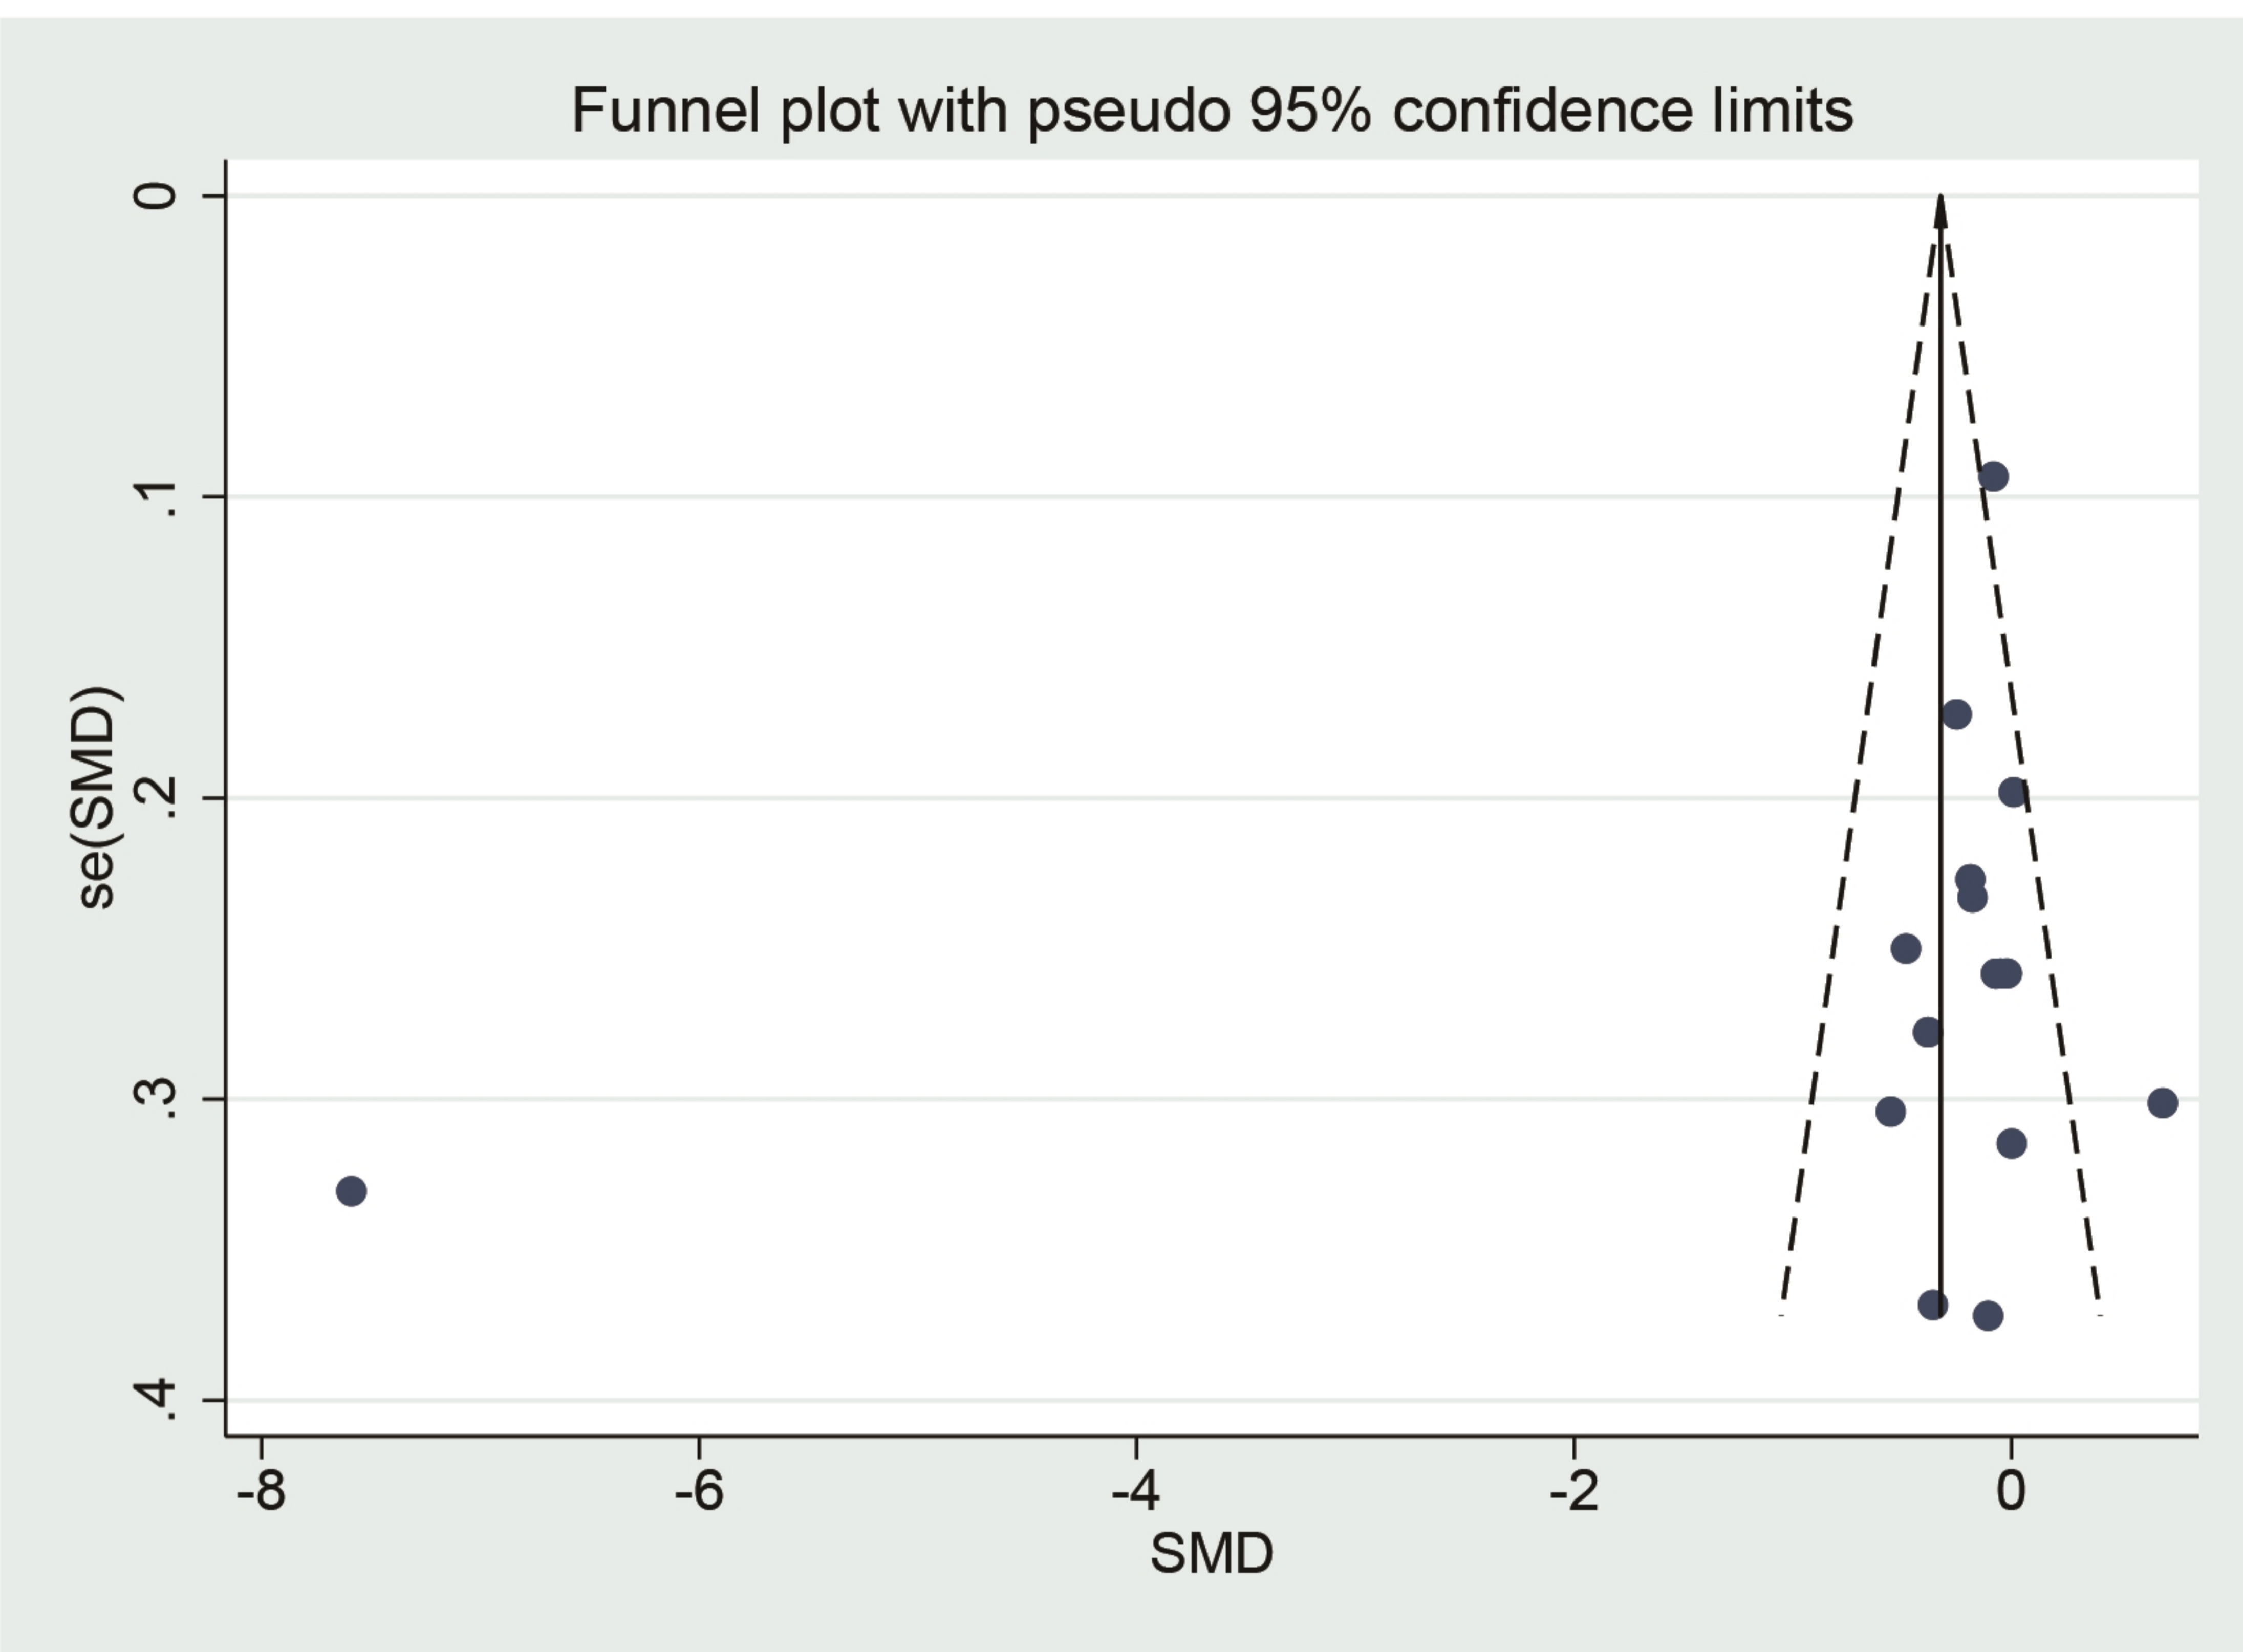**B**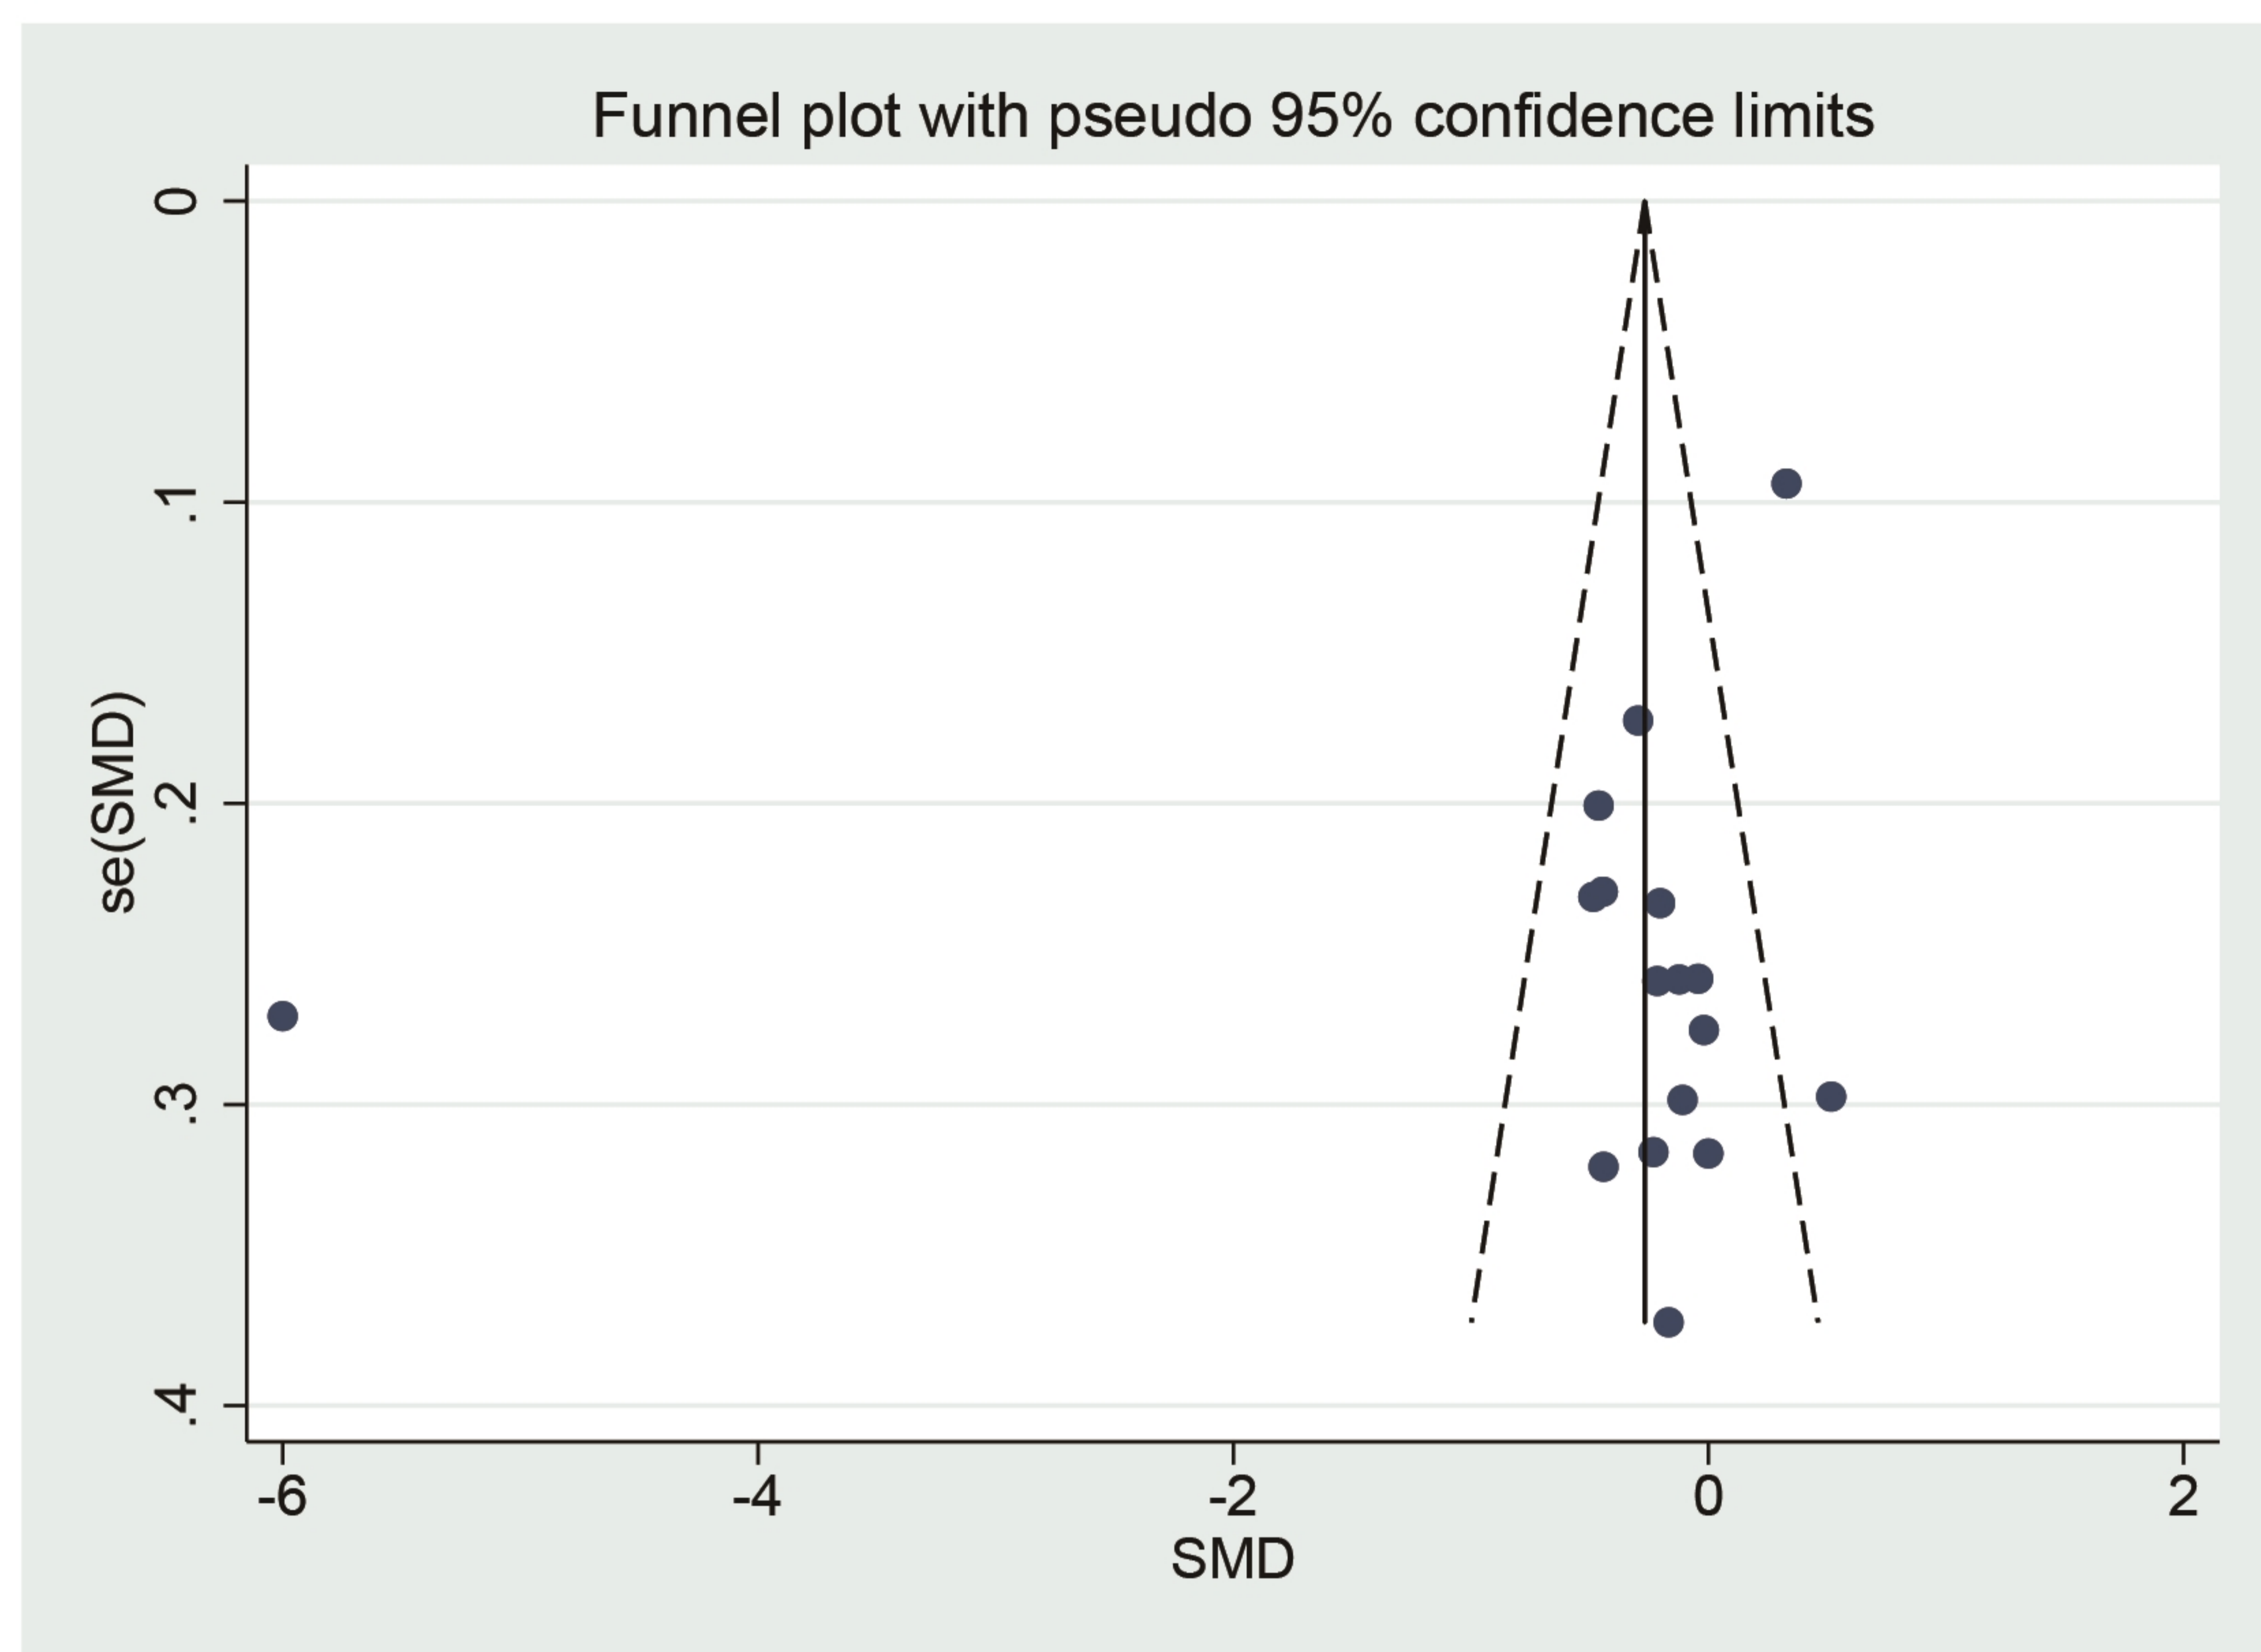**C**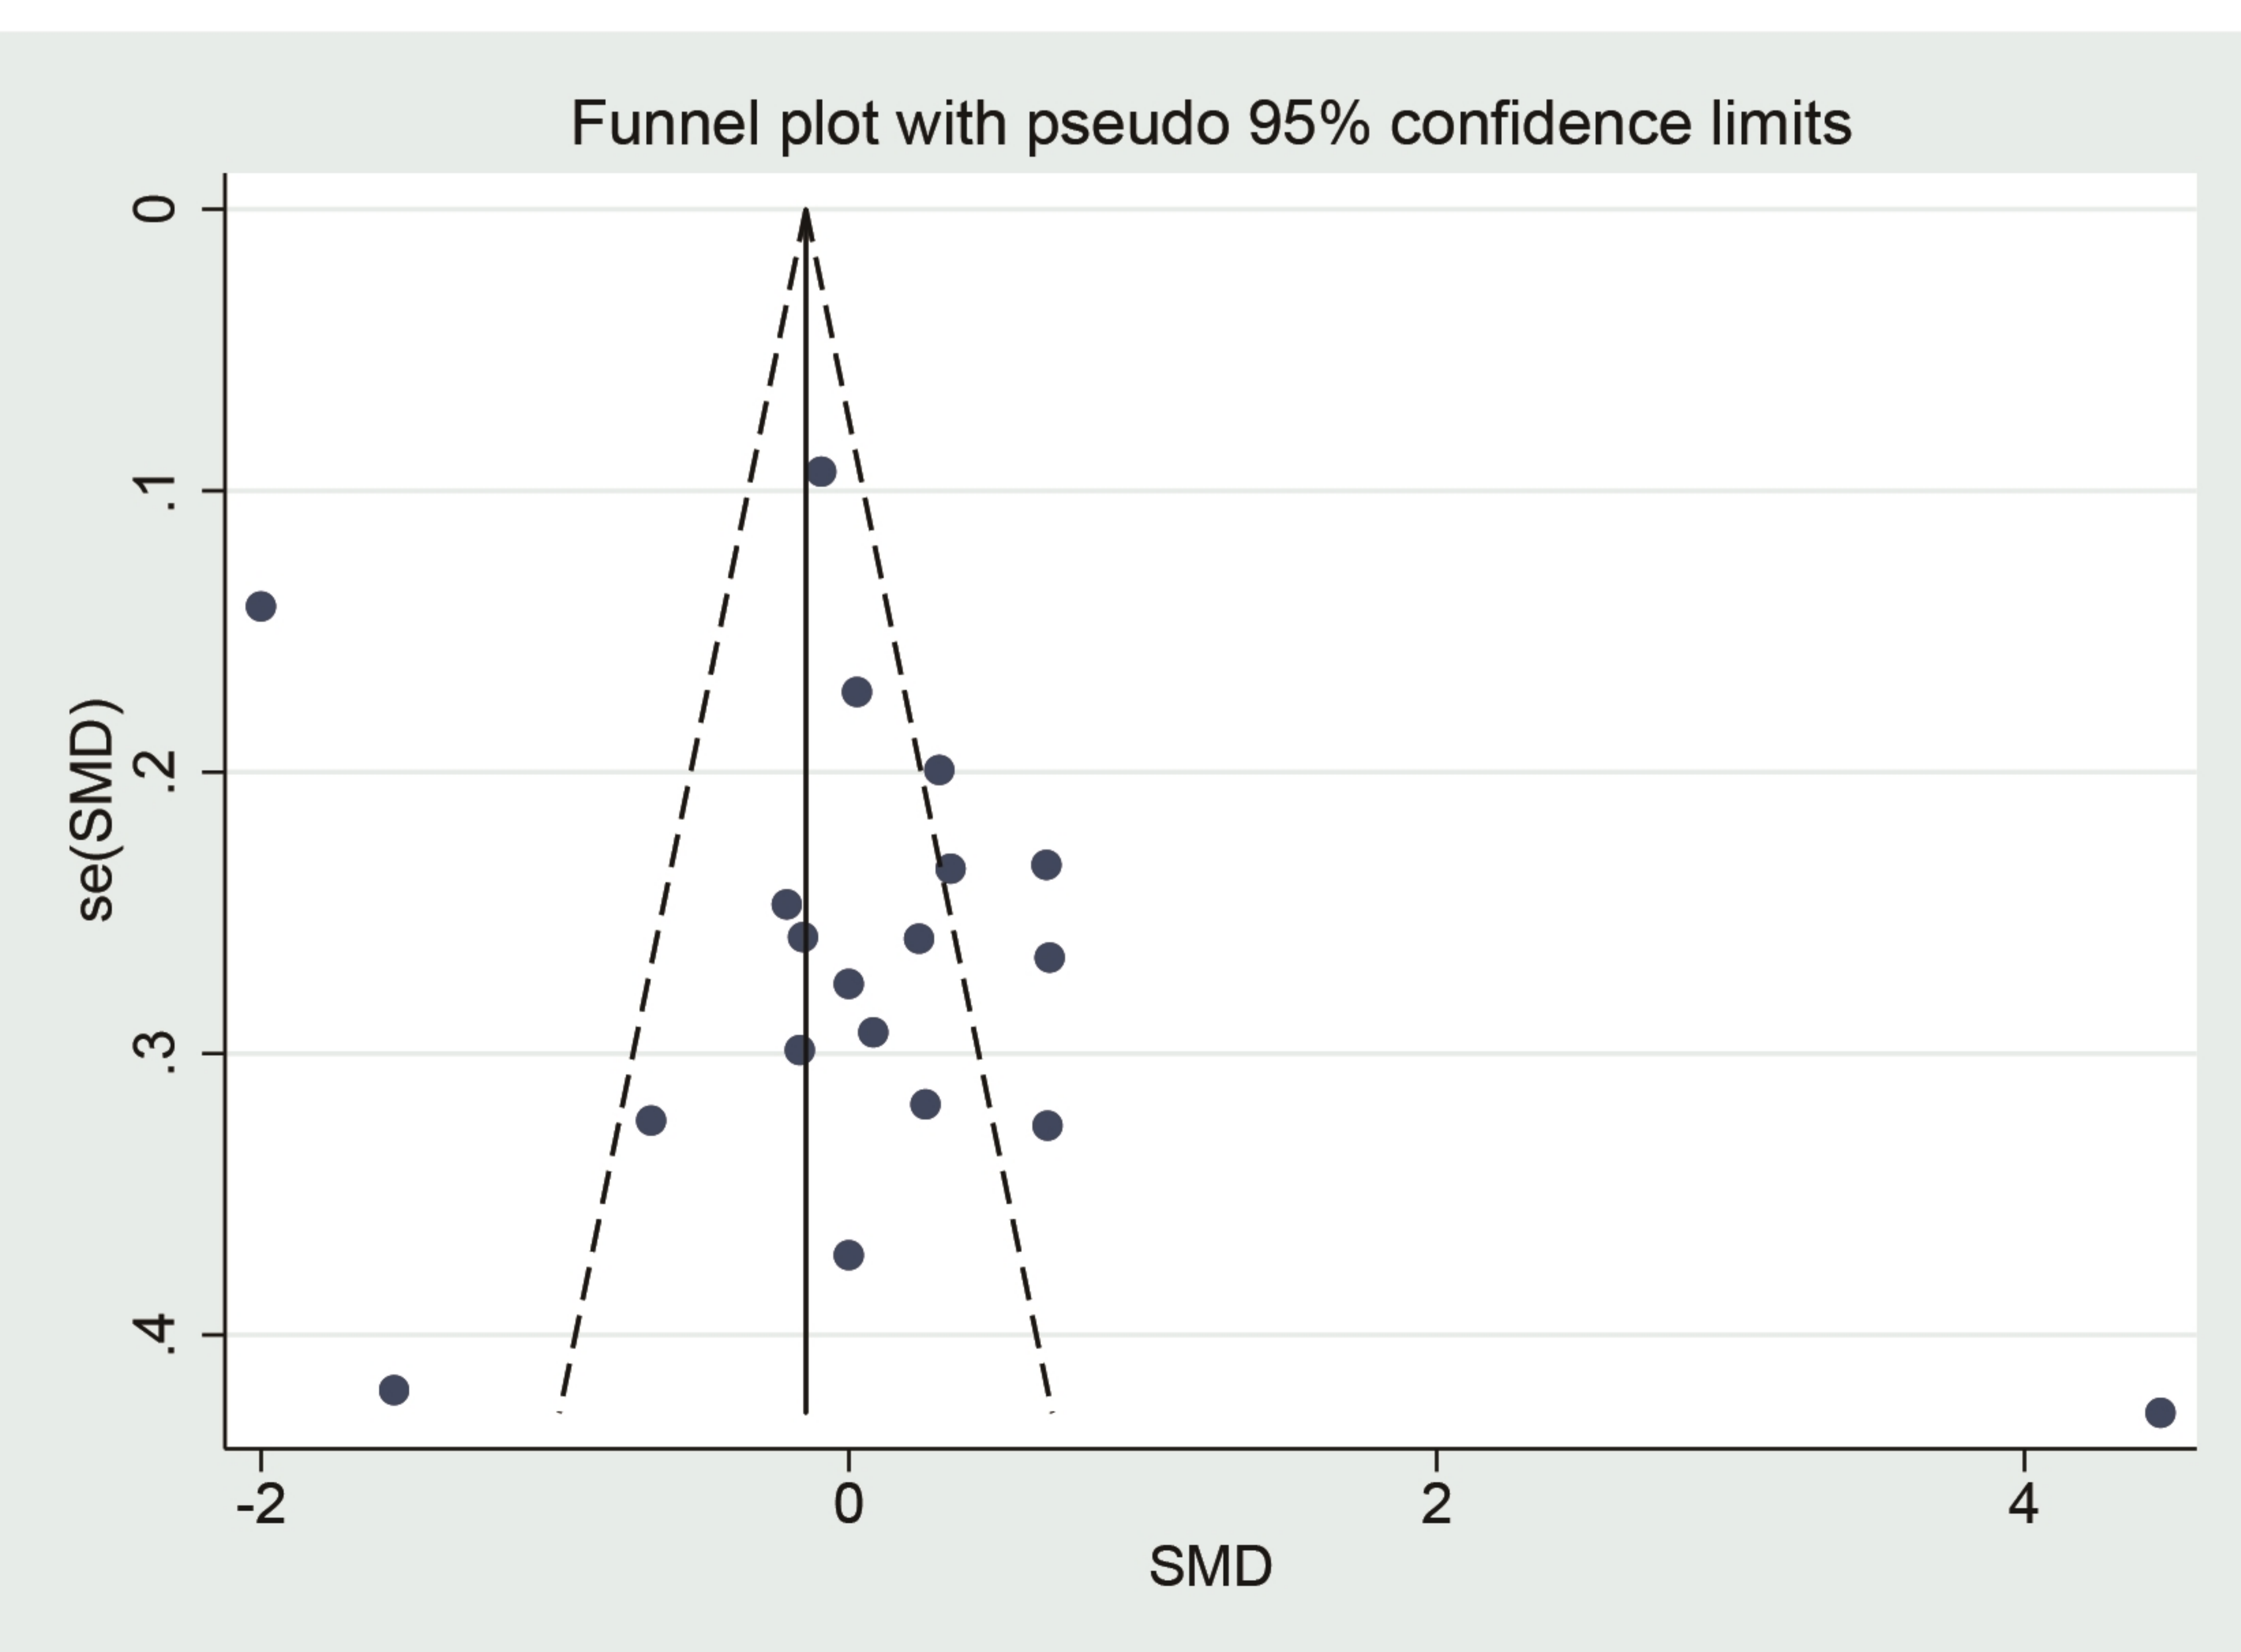**D**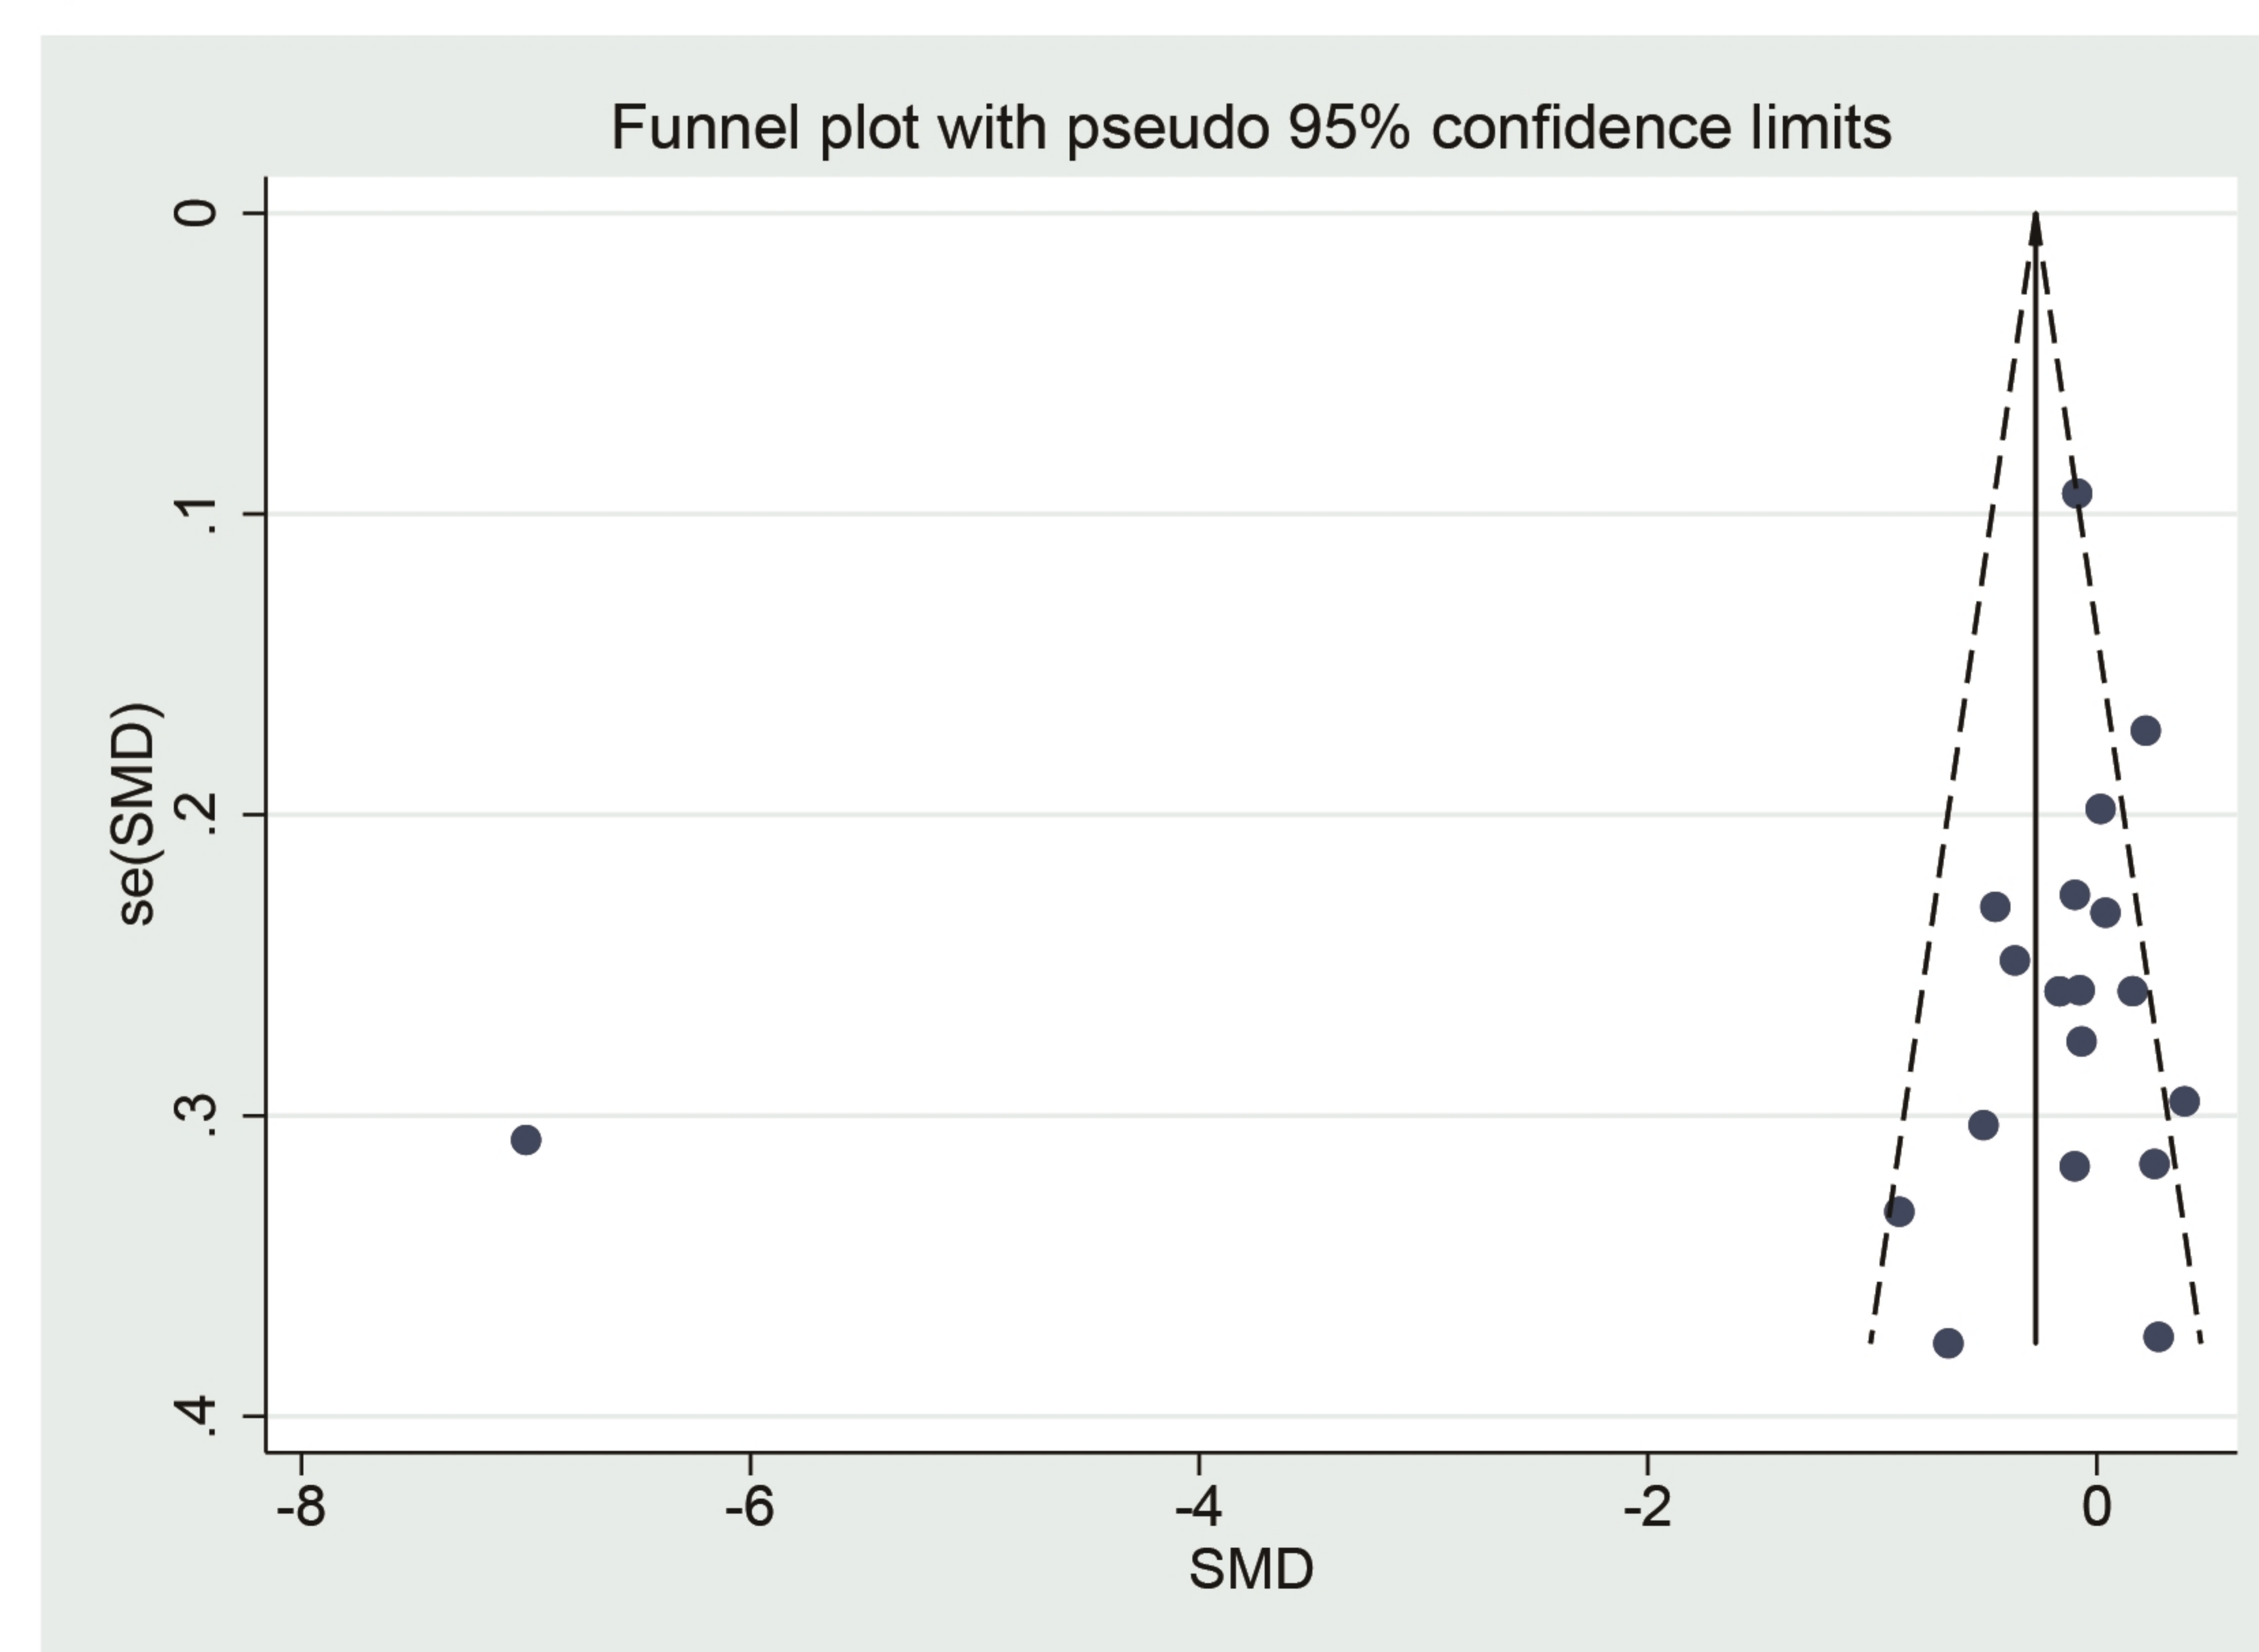

A

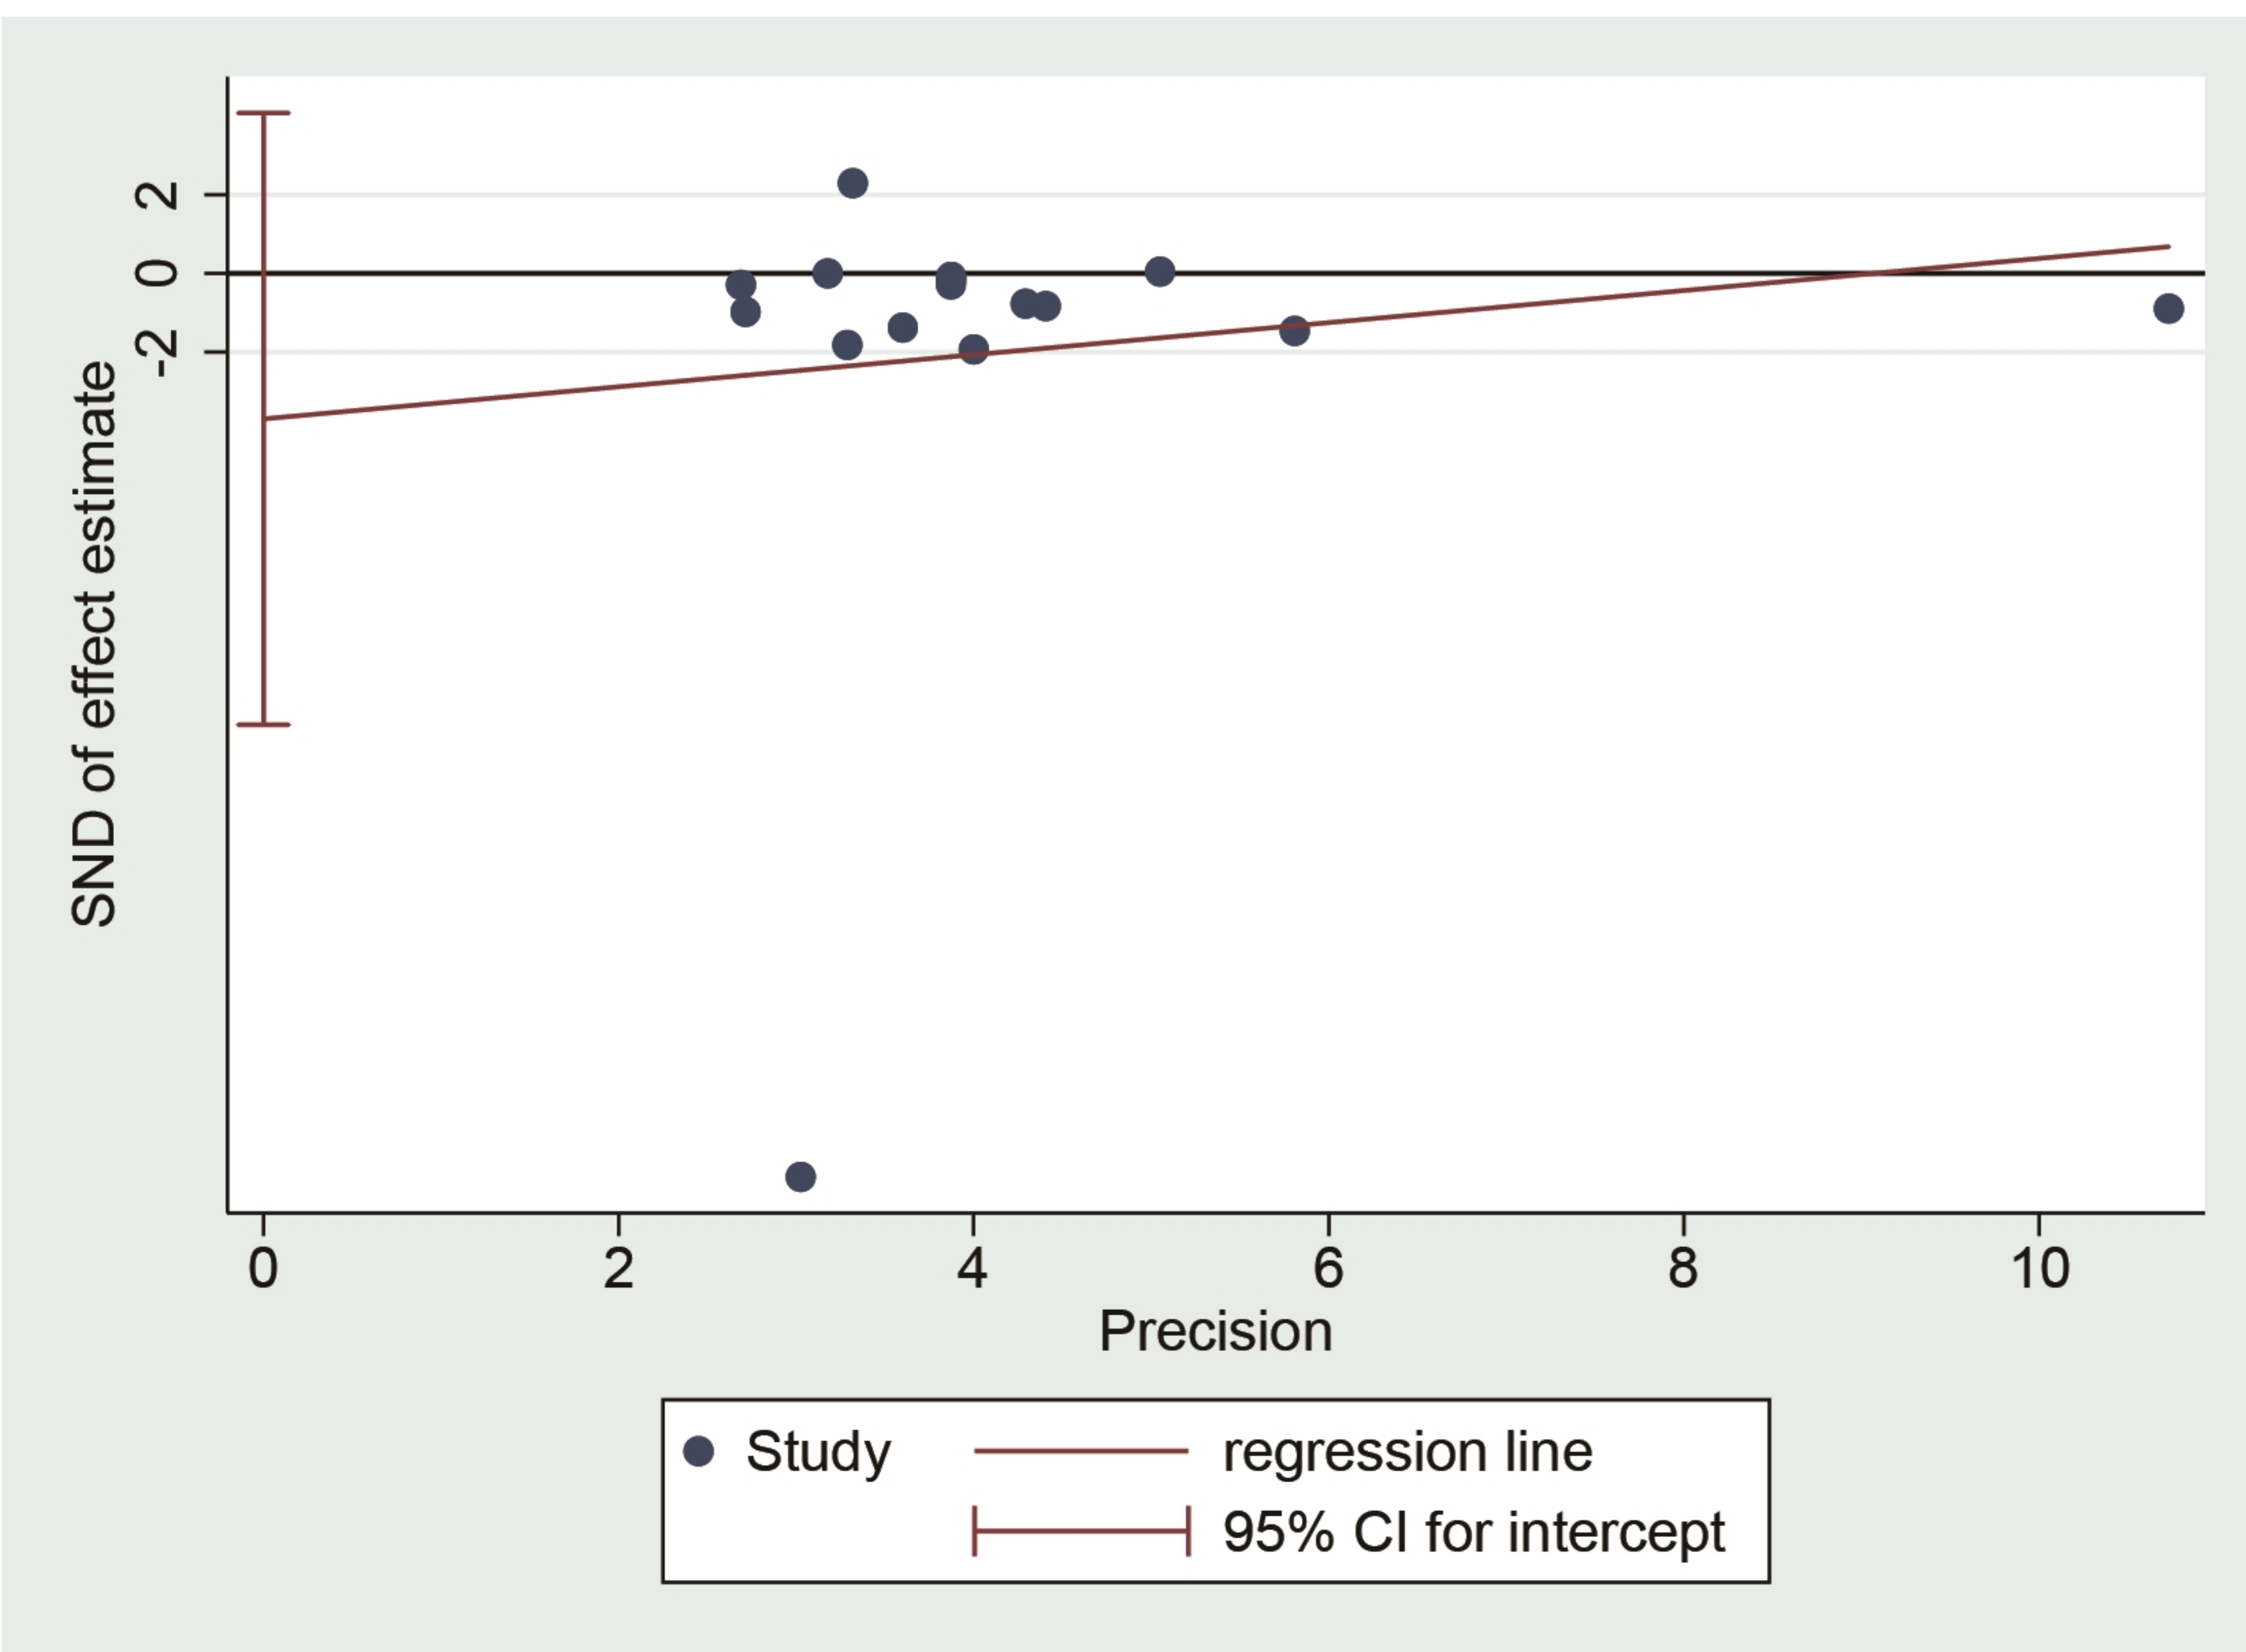

B

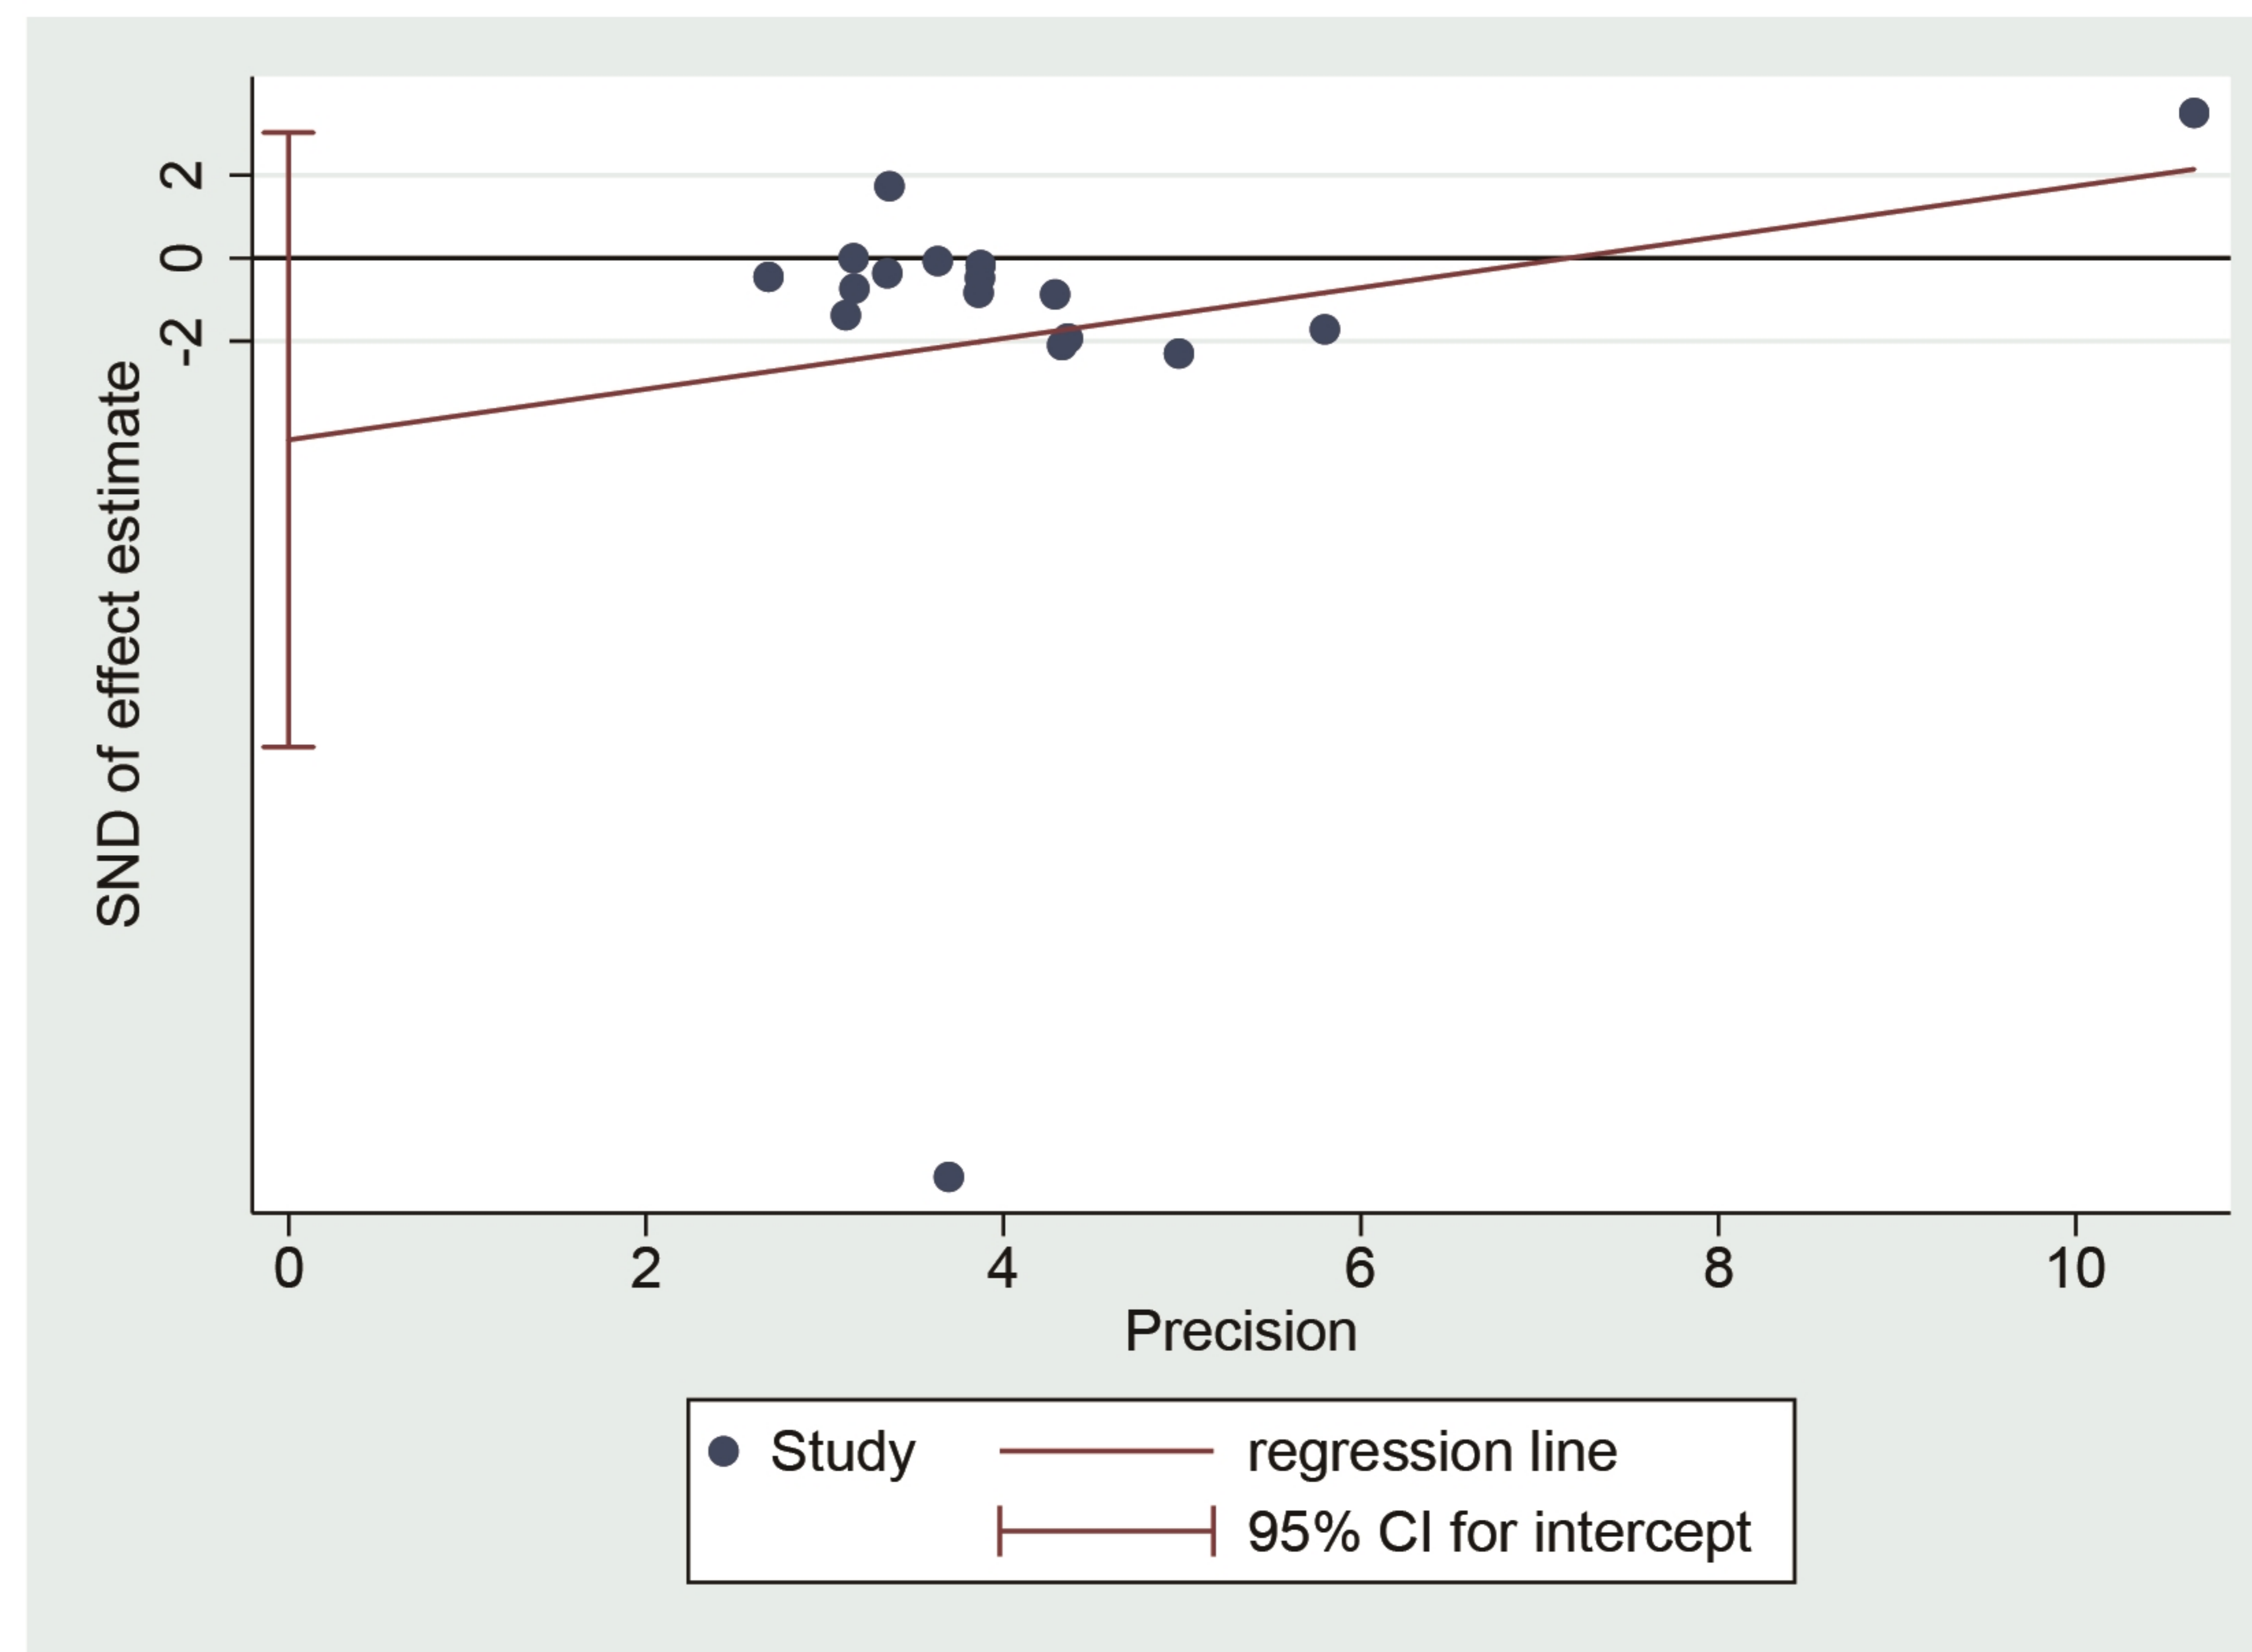

C

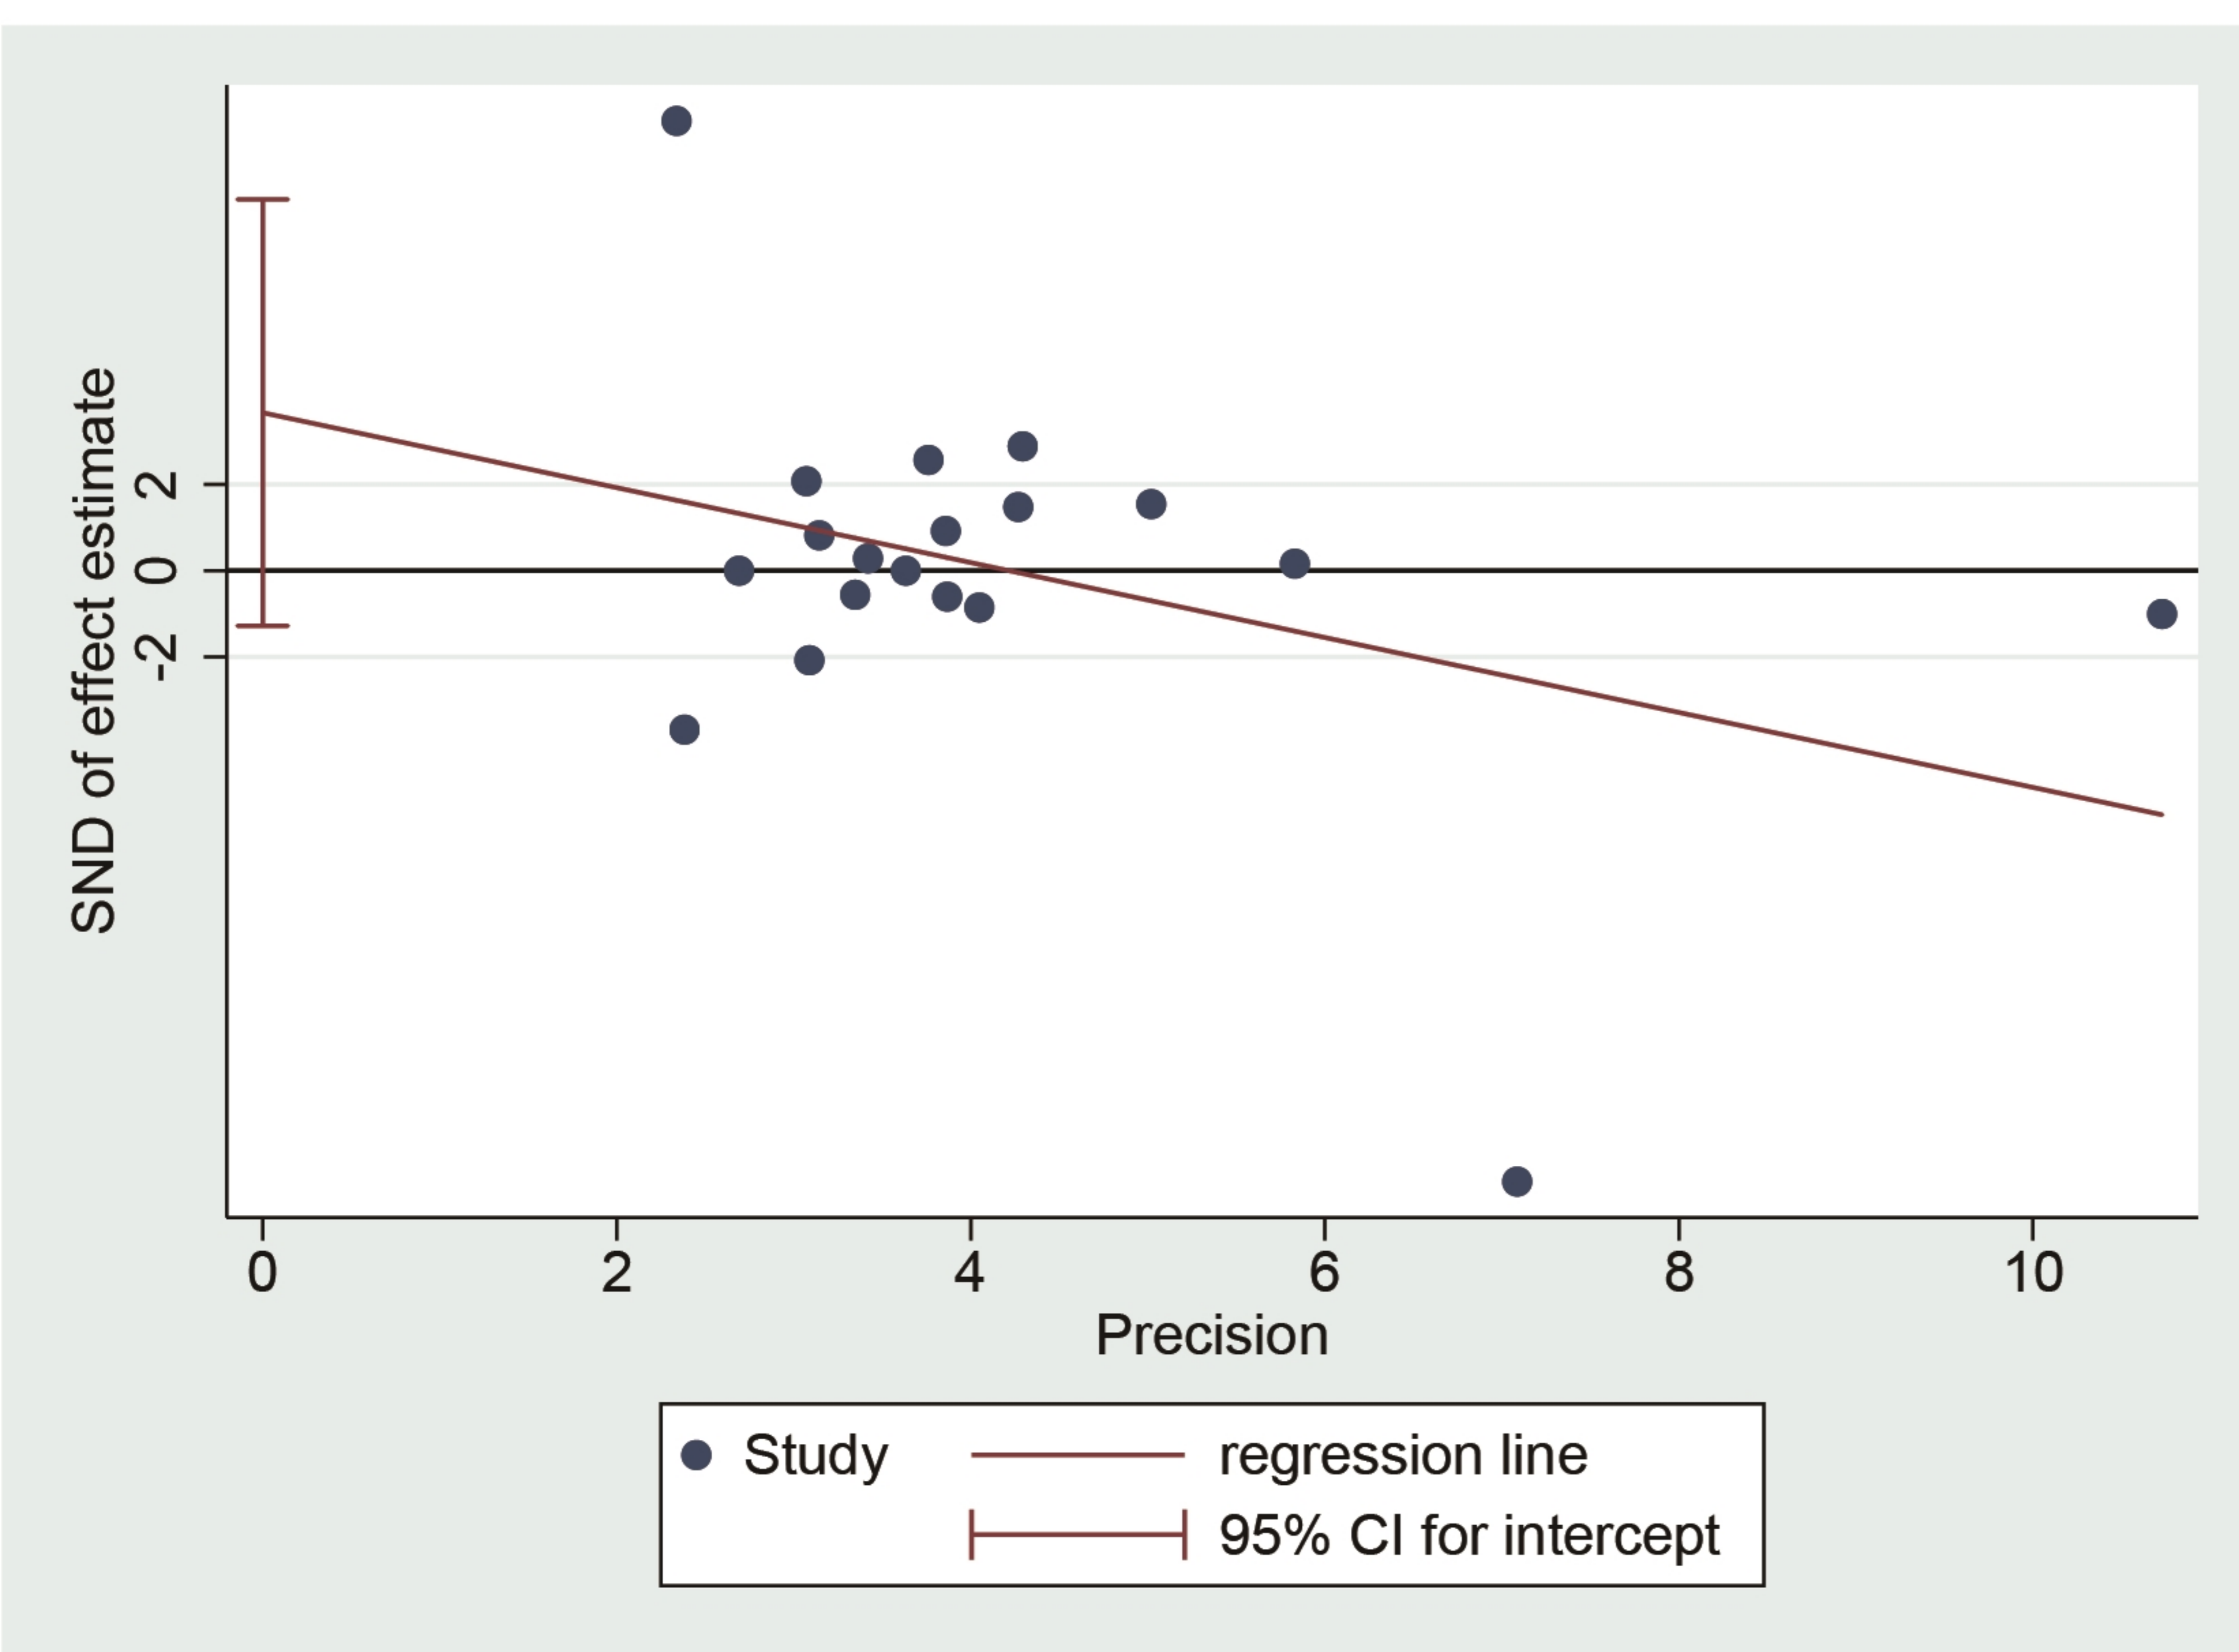

D

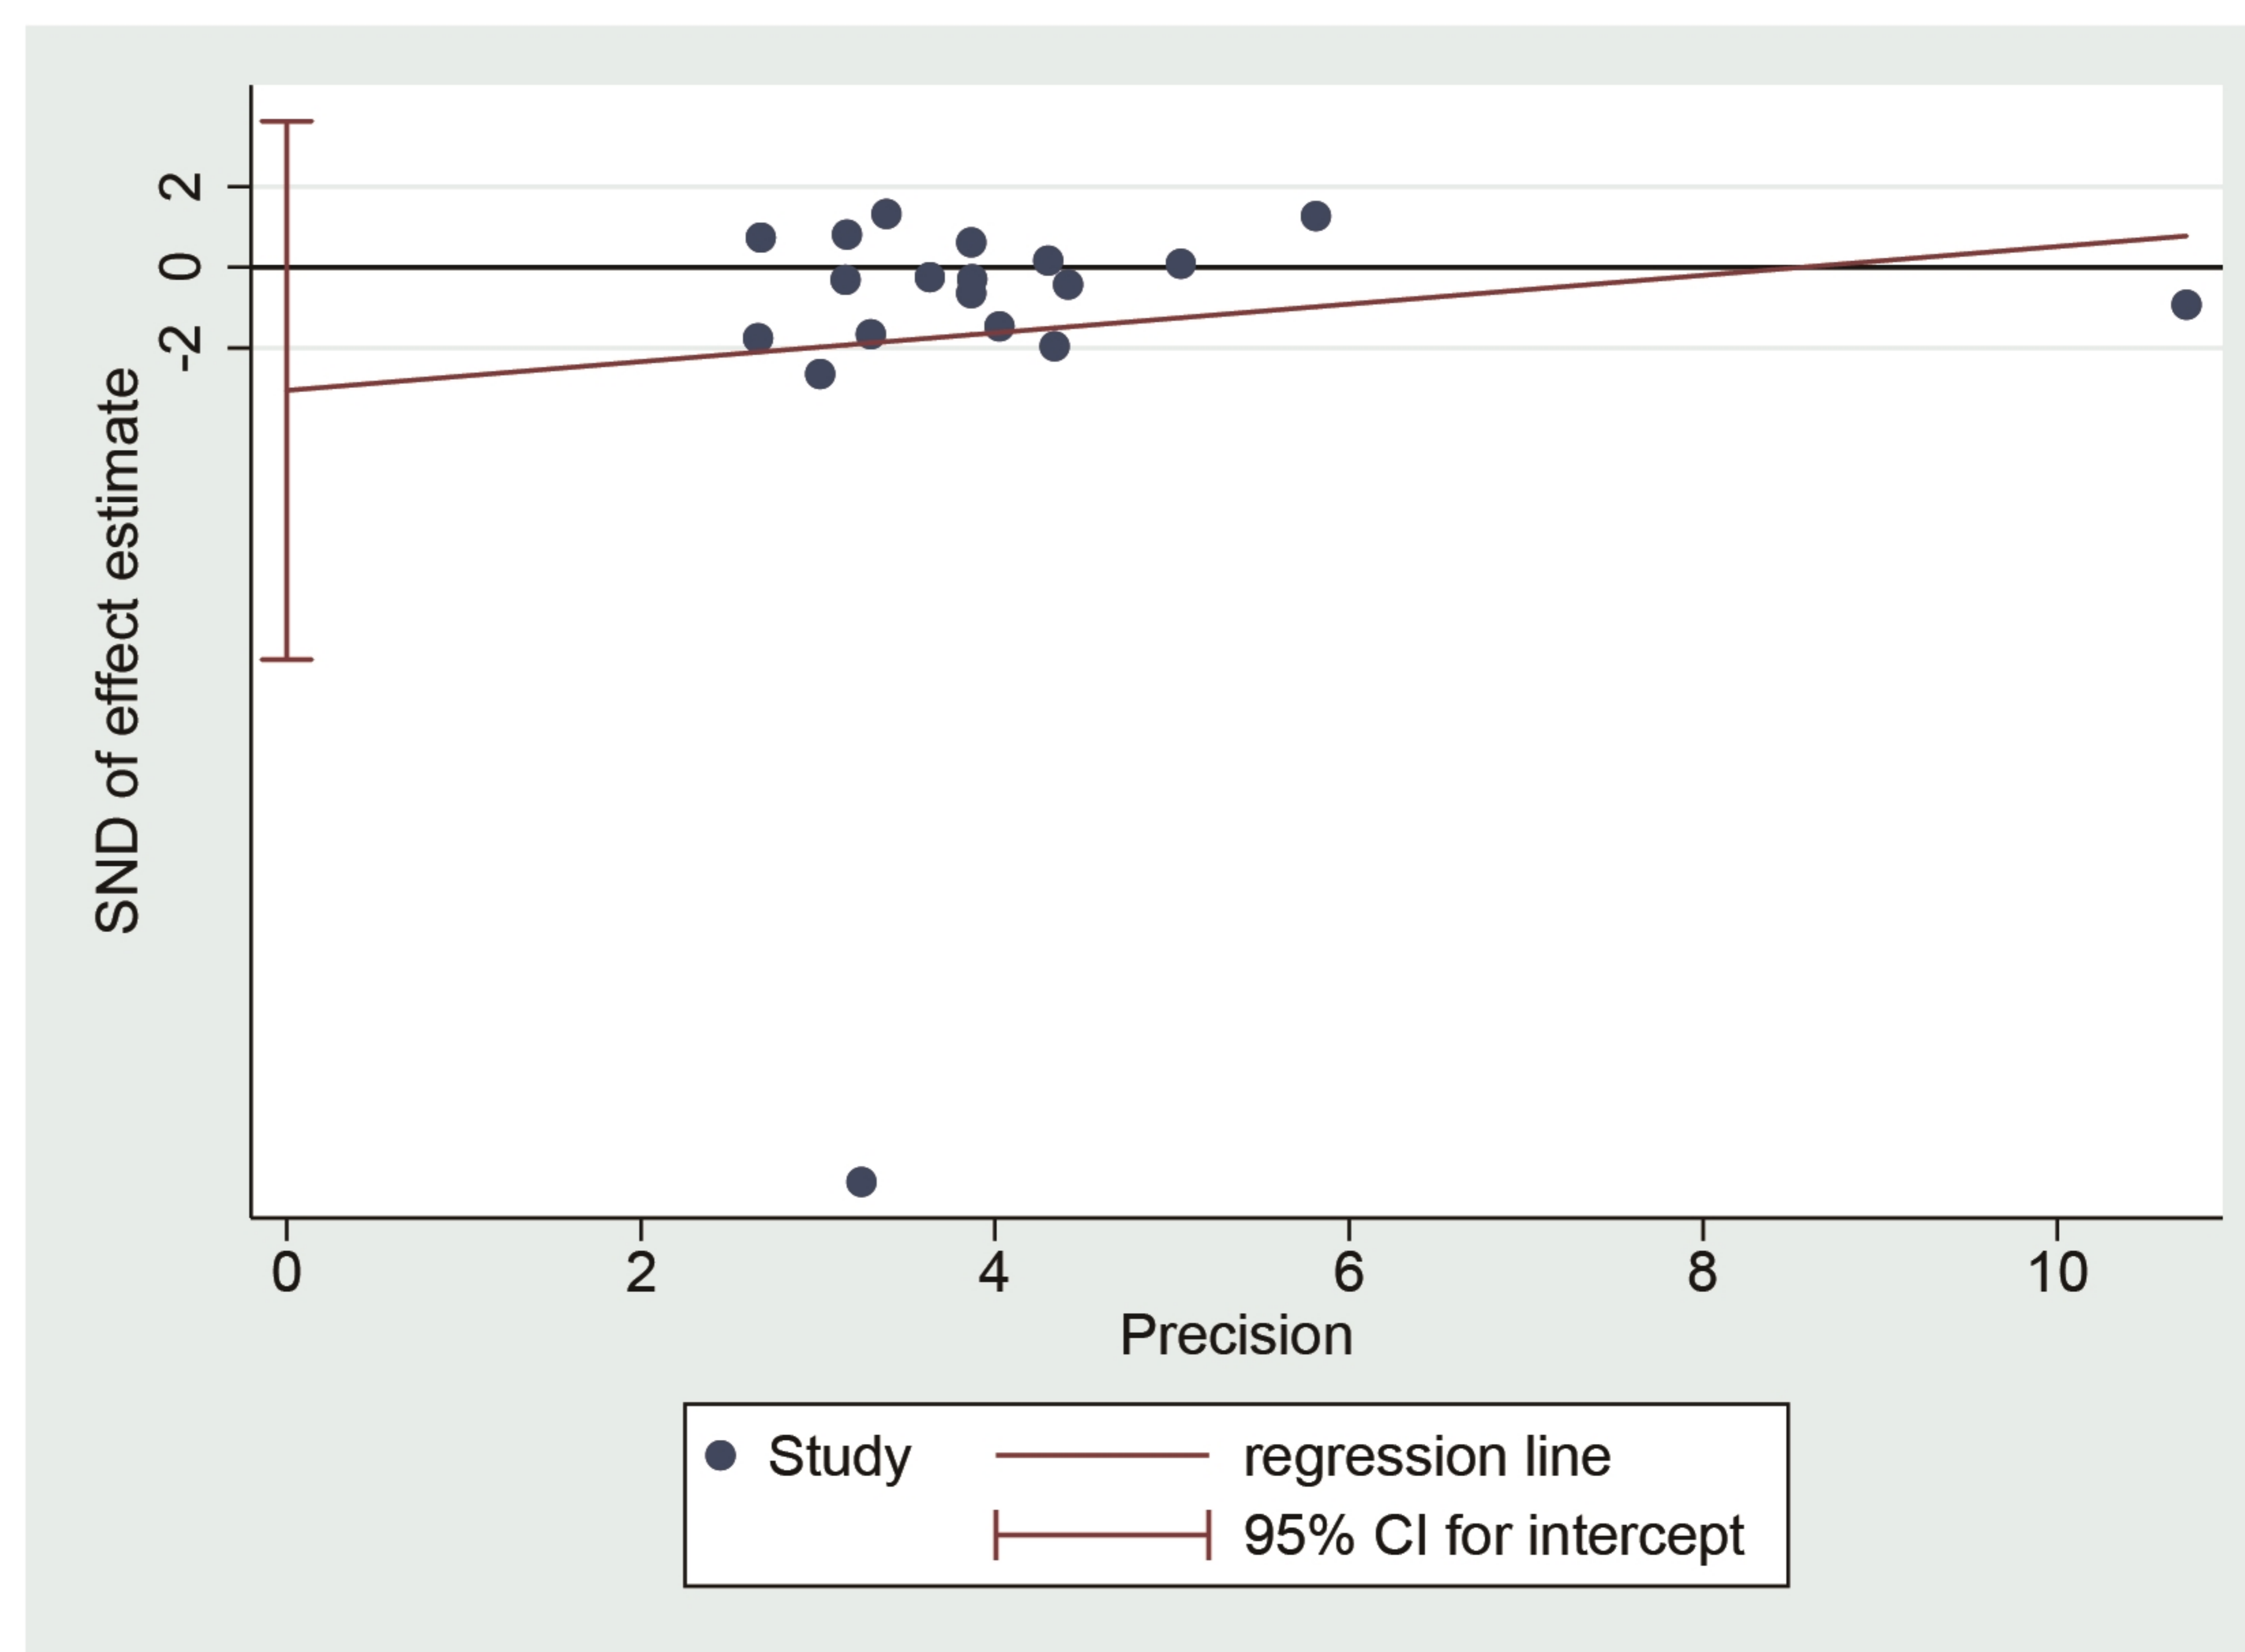

Note: A\_metabias\_ES\_seES, egger( $p=0.325$ ); B\_metabias\_ES\_seES, egger( $p=0.227$ )  
 C\_metabias\_ES\_seES, egger( $p=0.136$ ); D\_metabias\_ES\_seES, egger( $p=0.348$ )

**A**

Funnel plot with pseudo 95% confidence limits

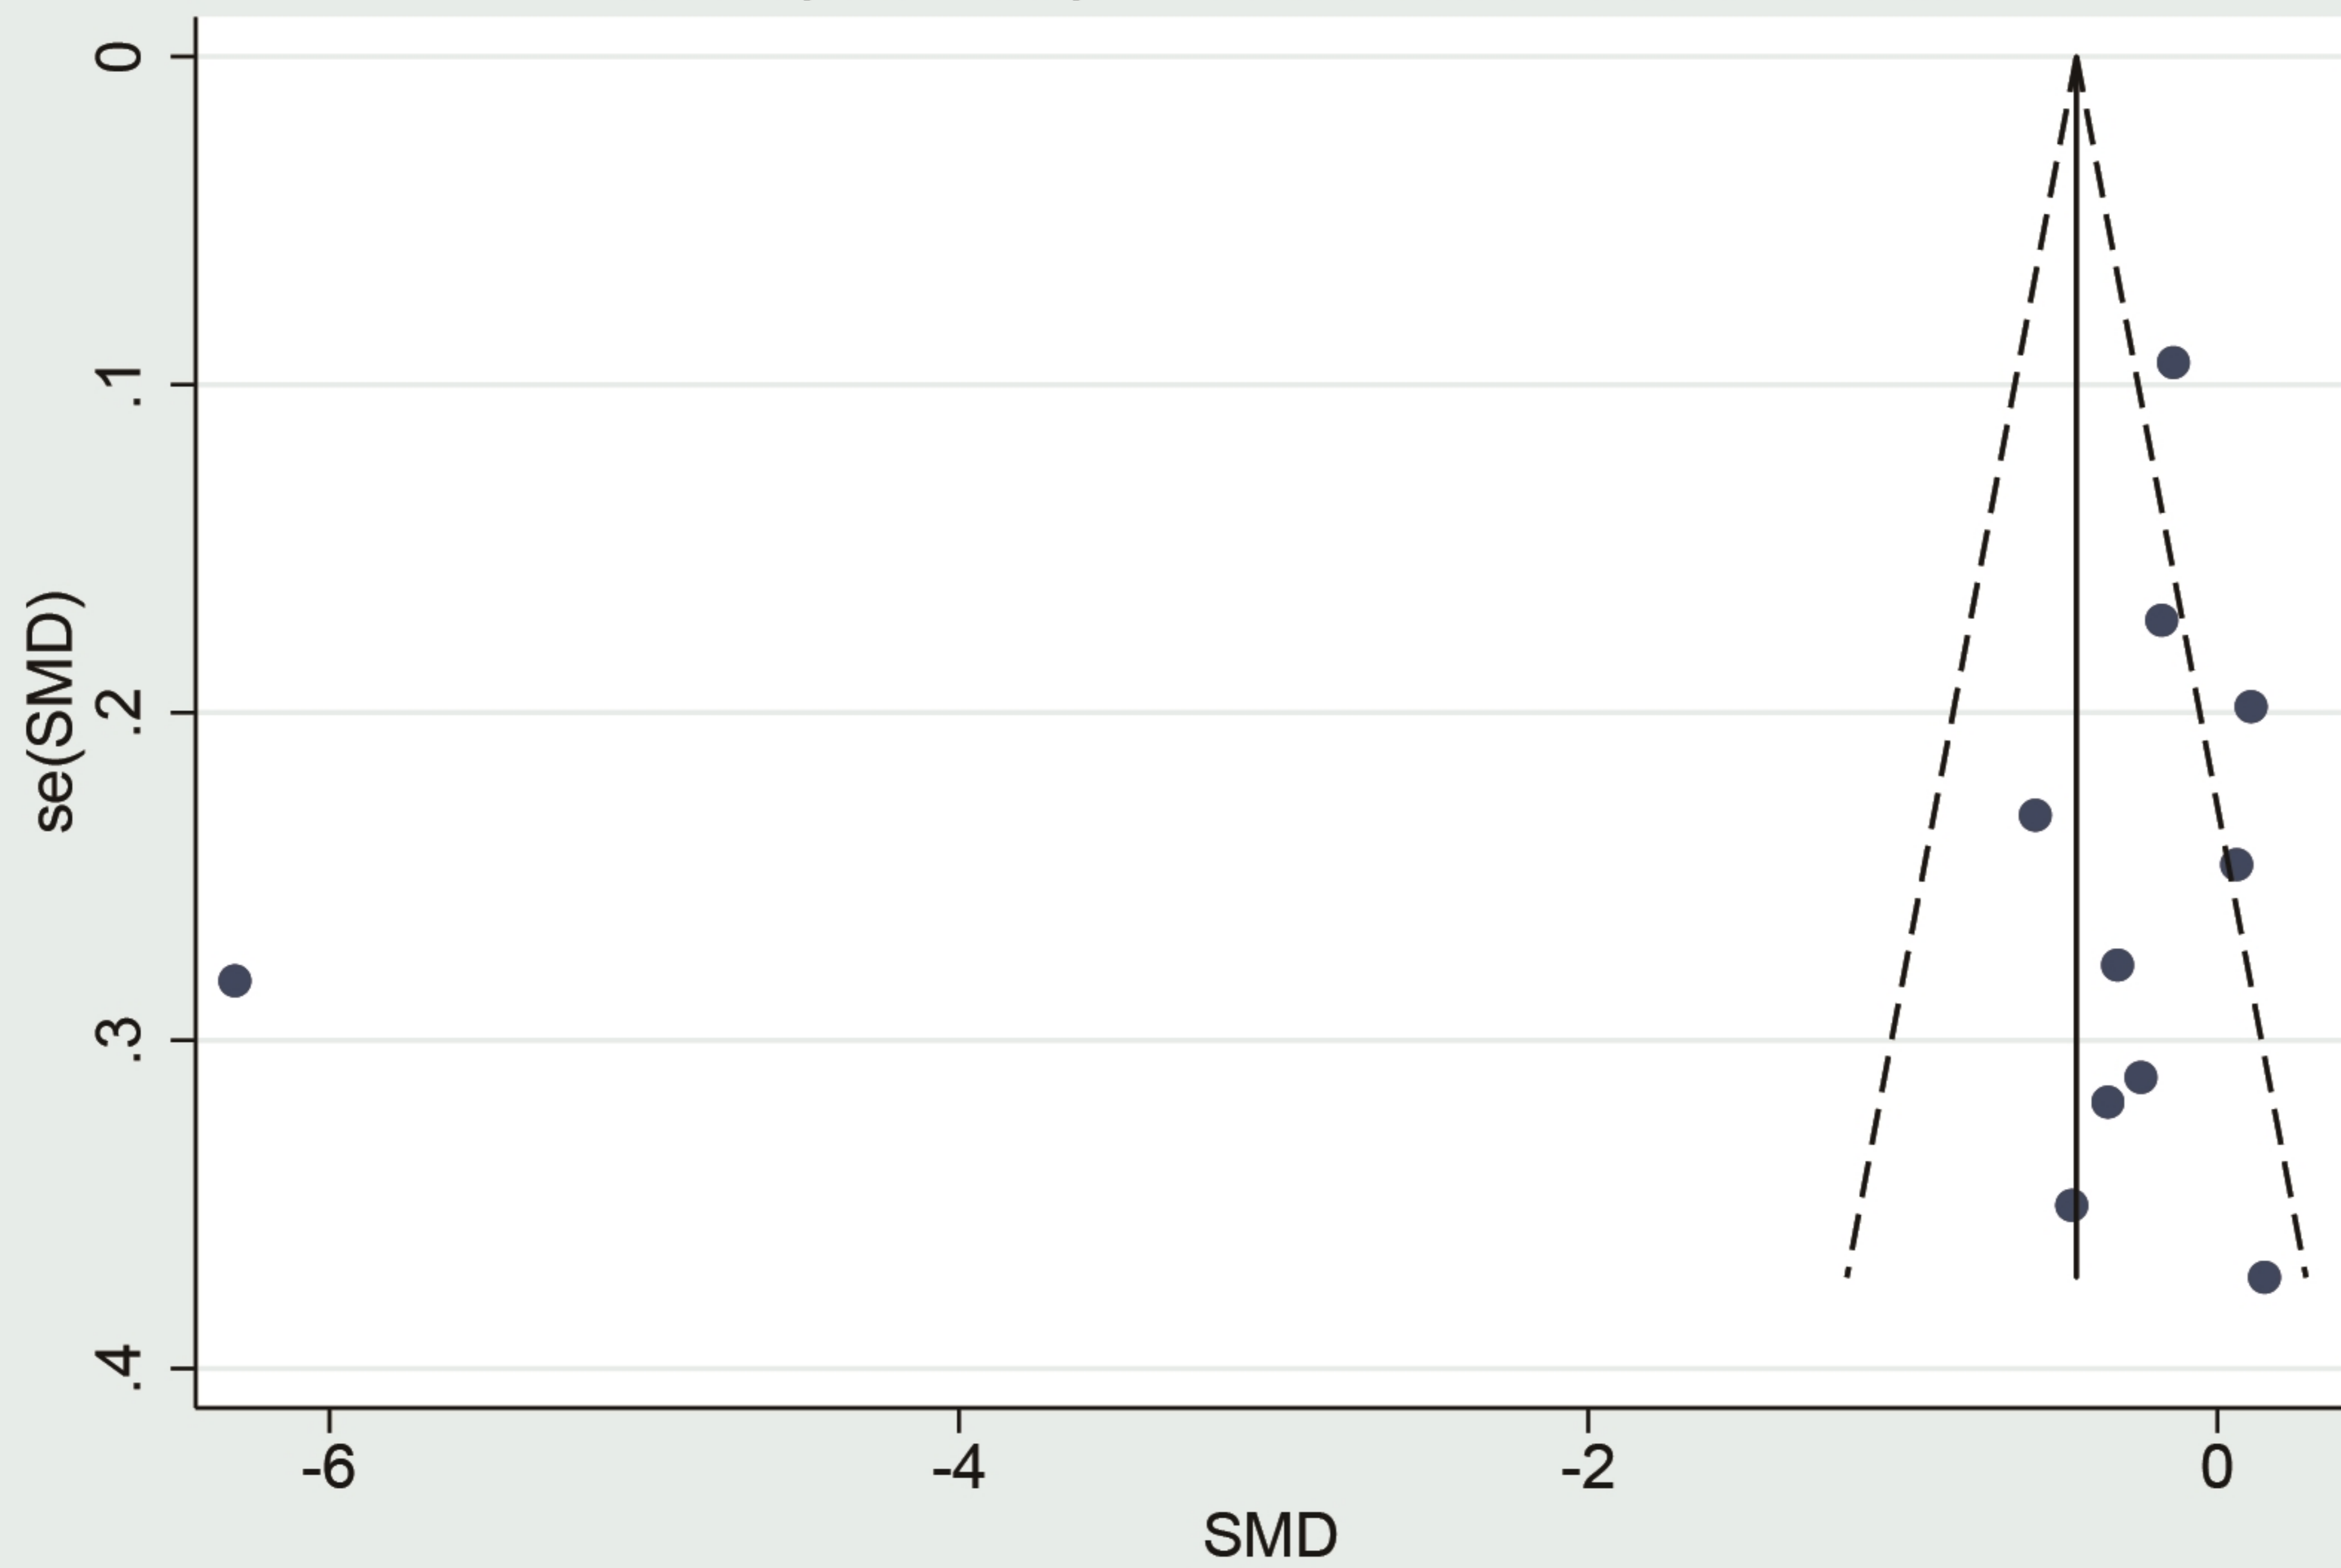**B**

Funnel plot with pseudo 95% confidence limits

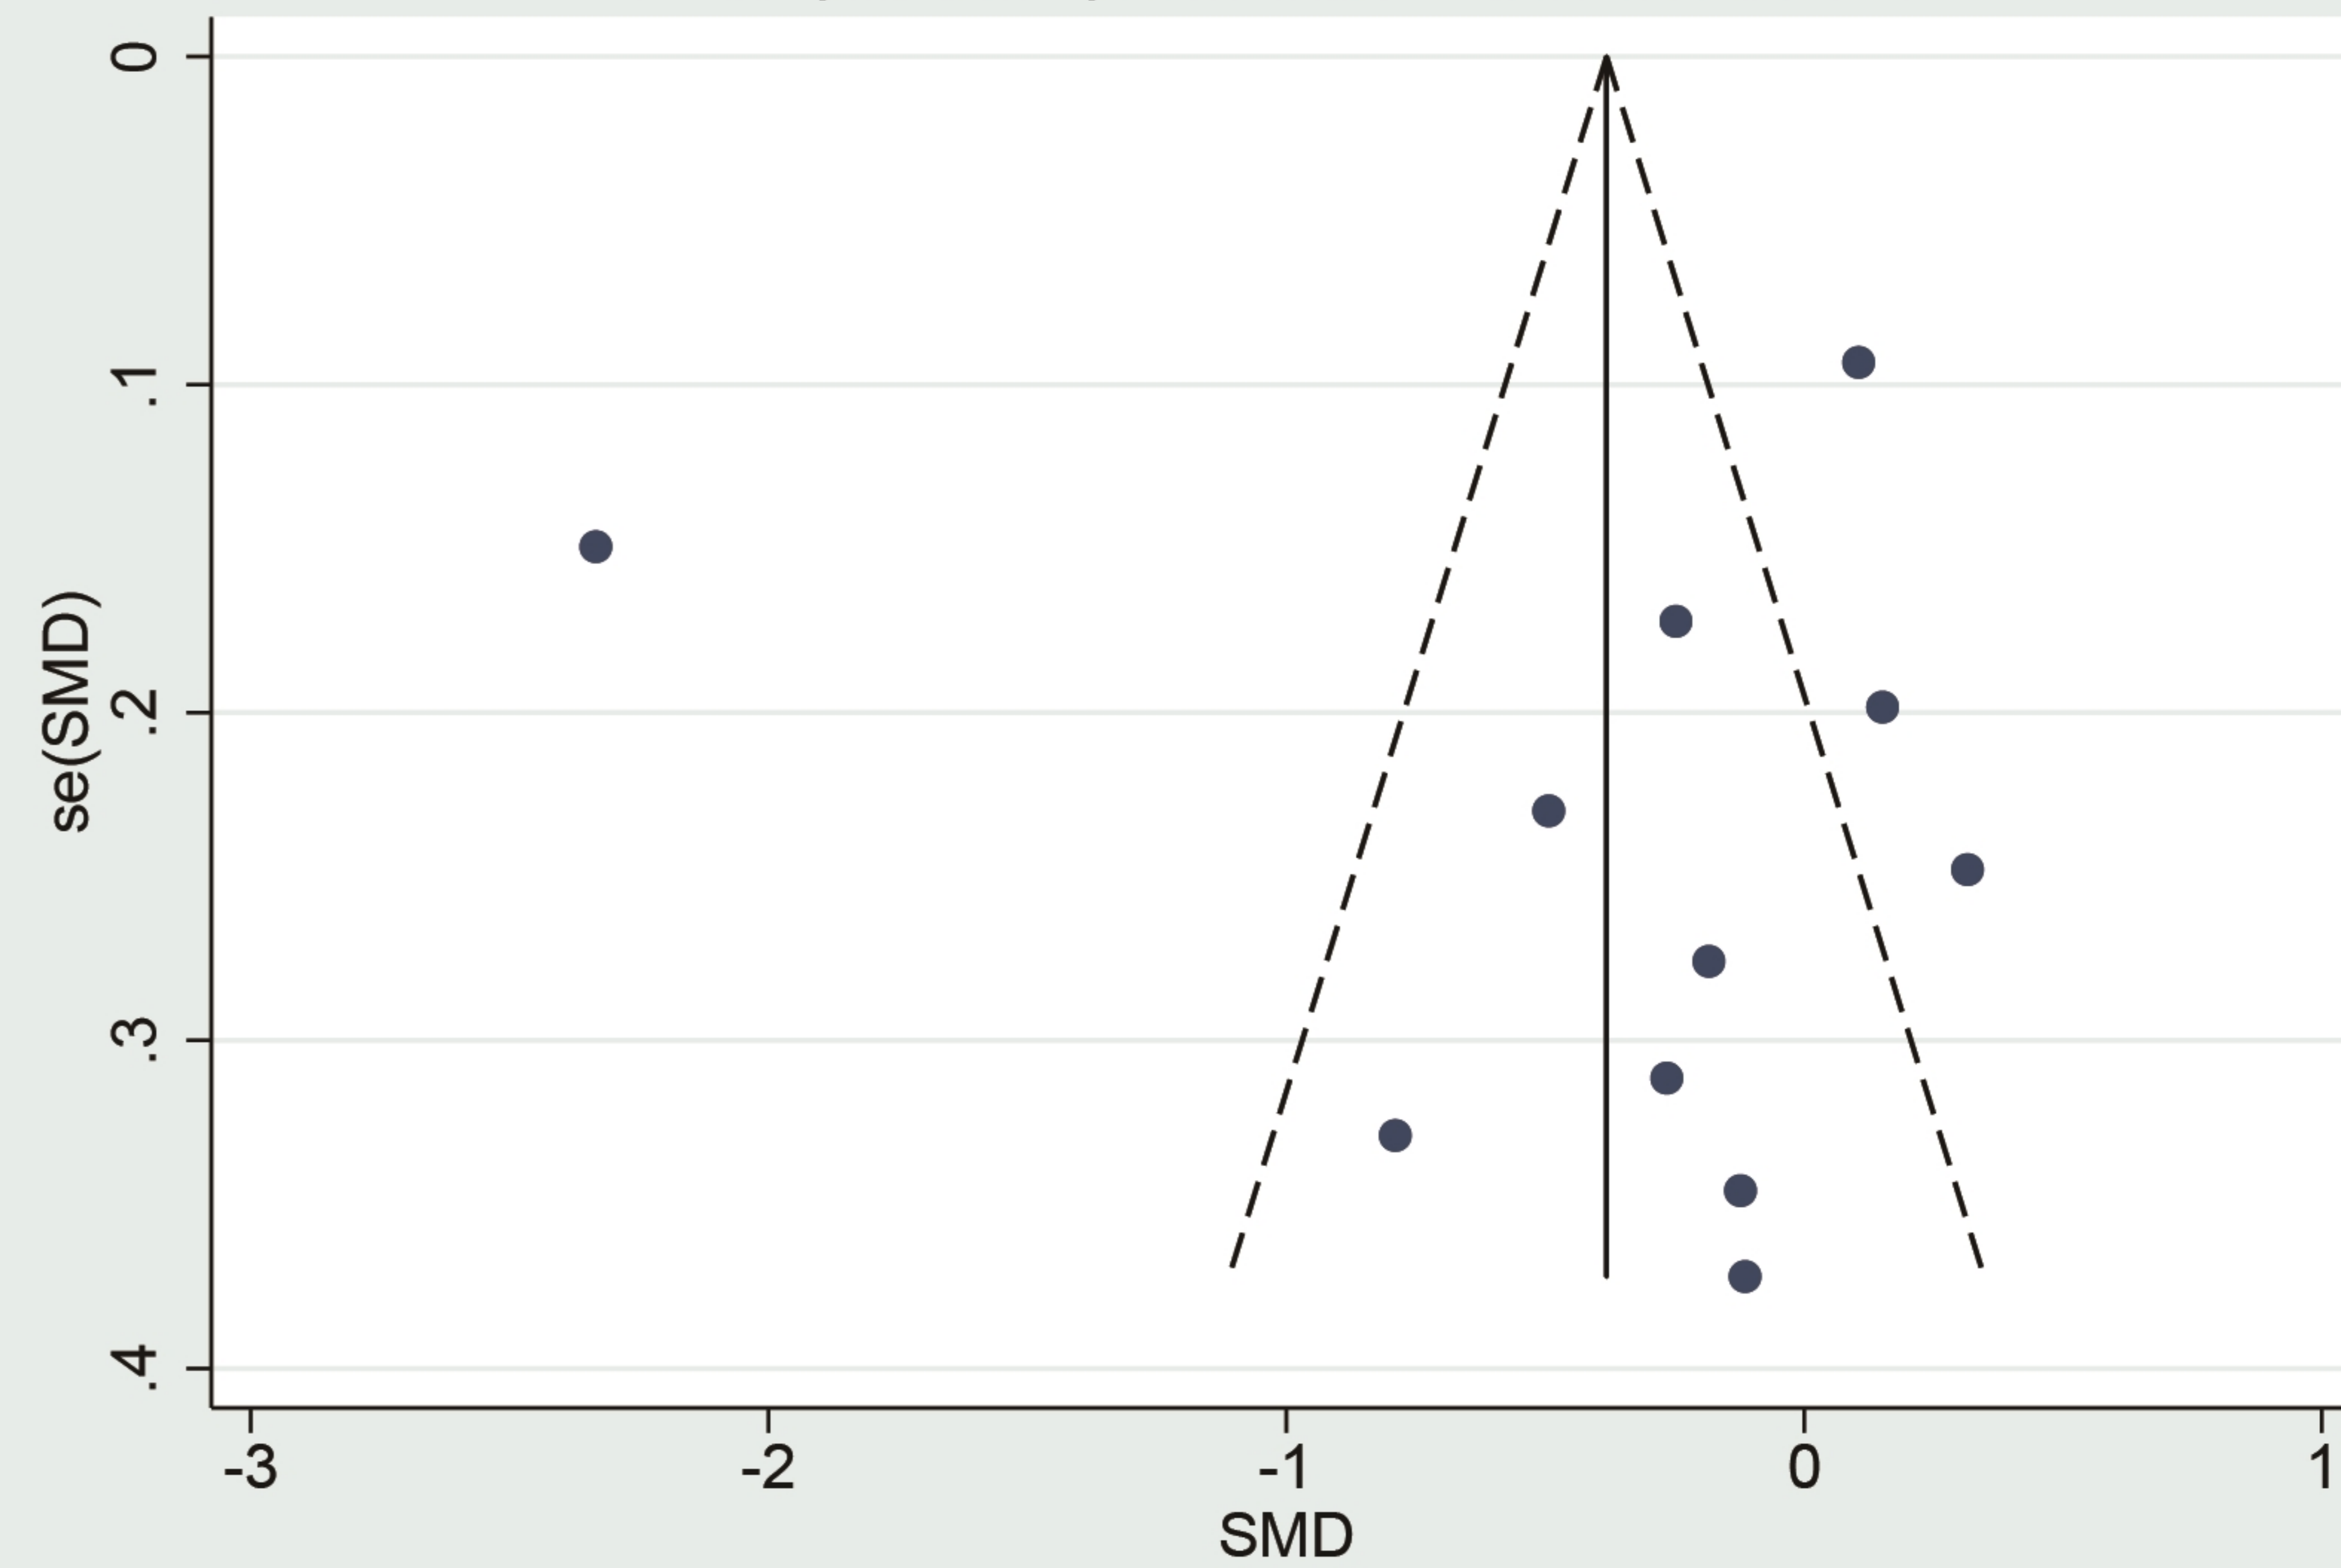



**A**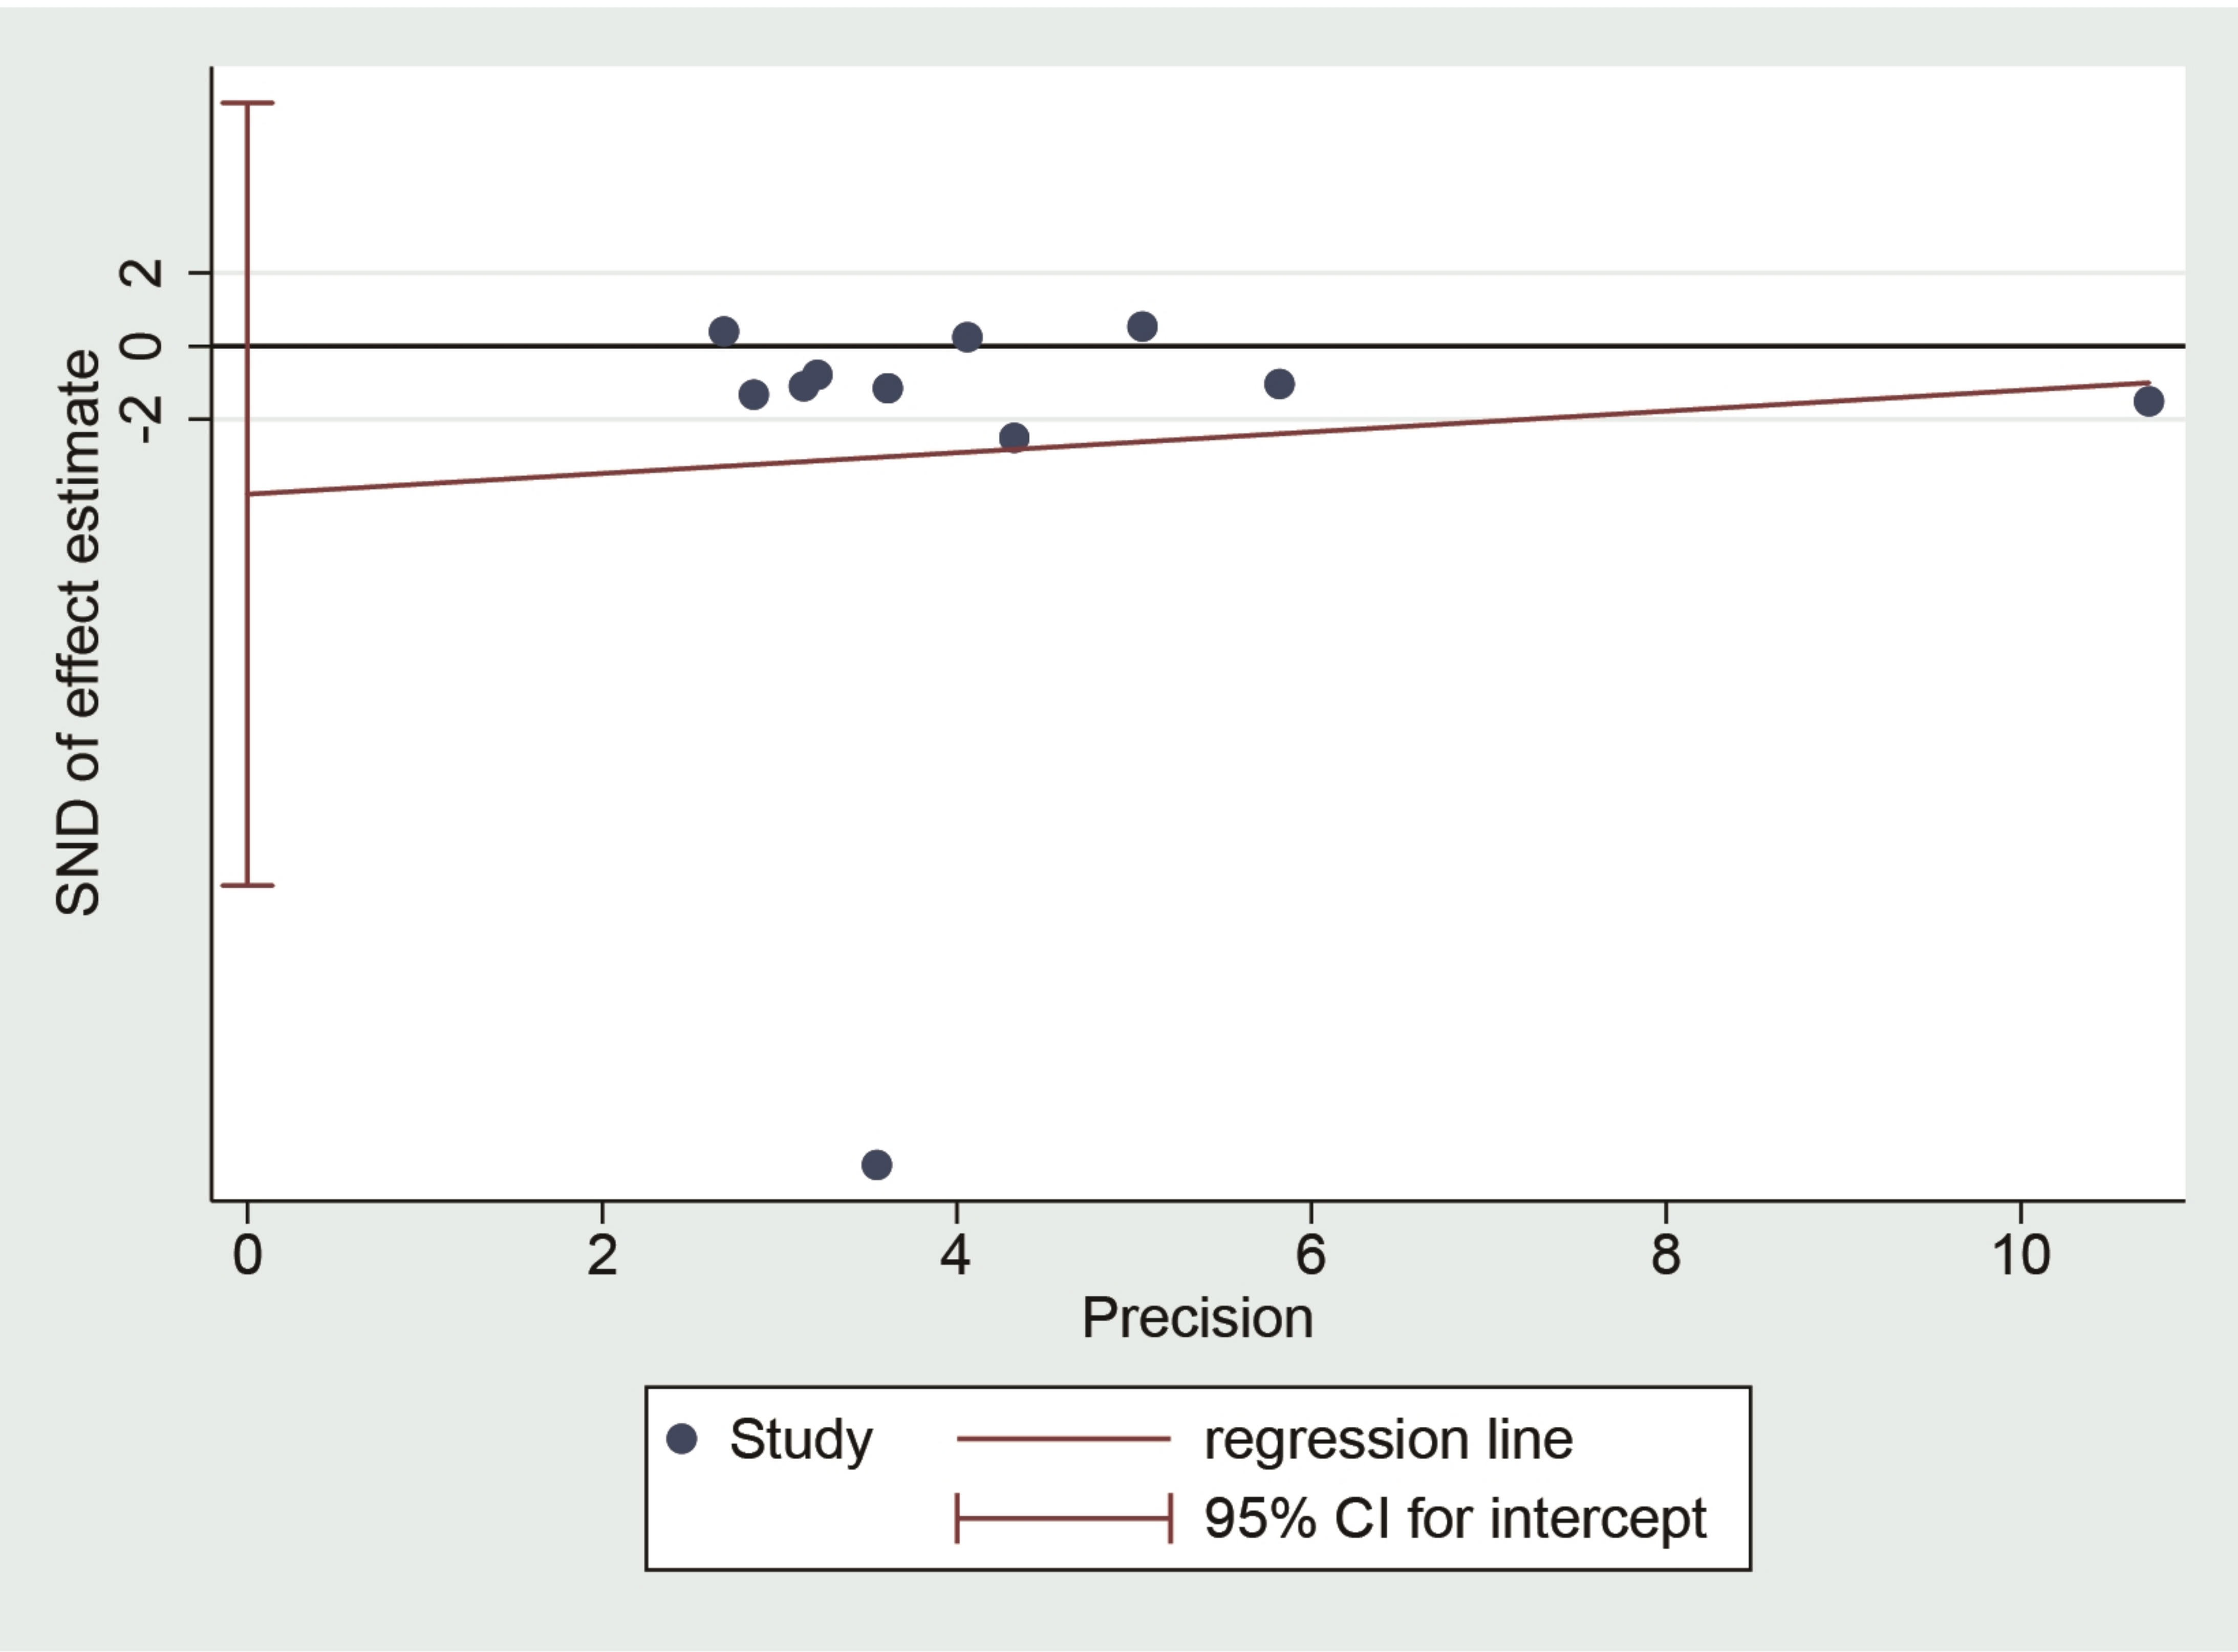**B**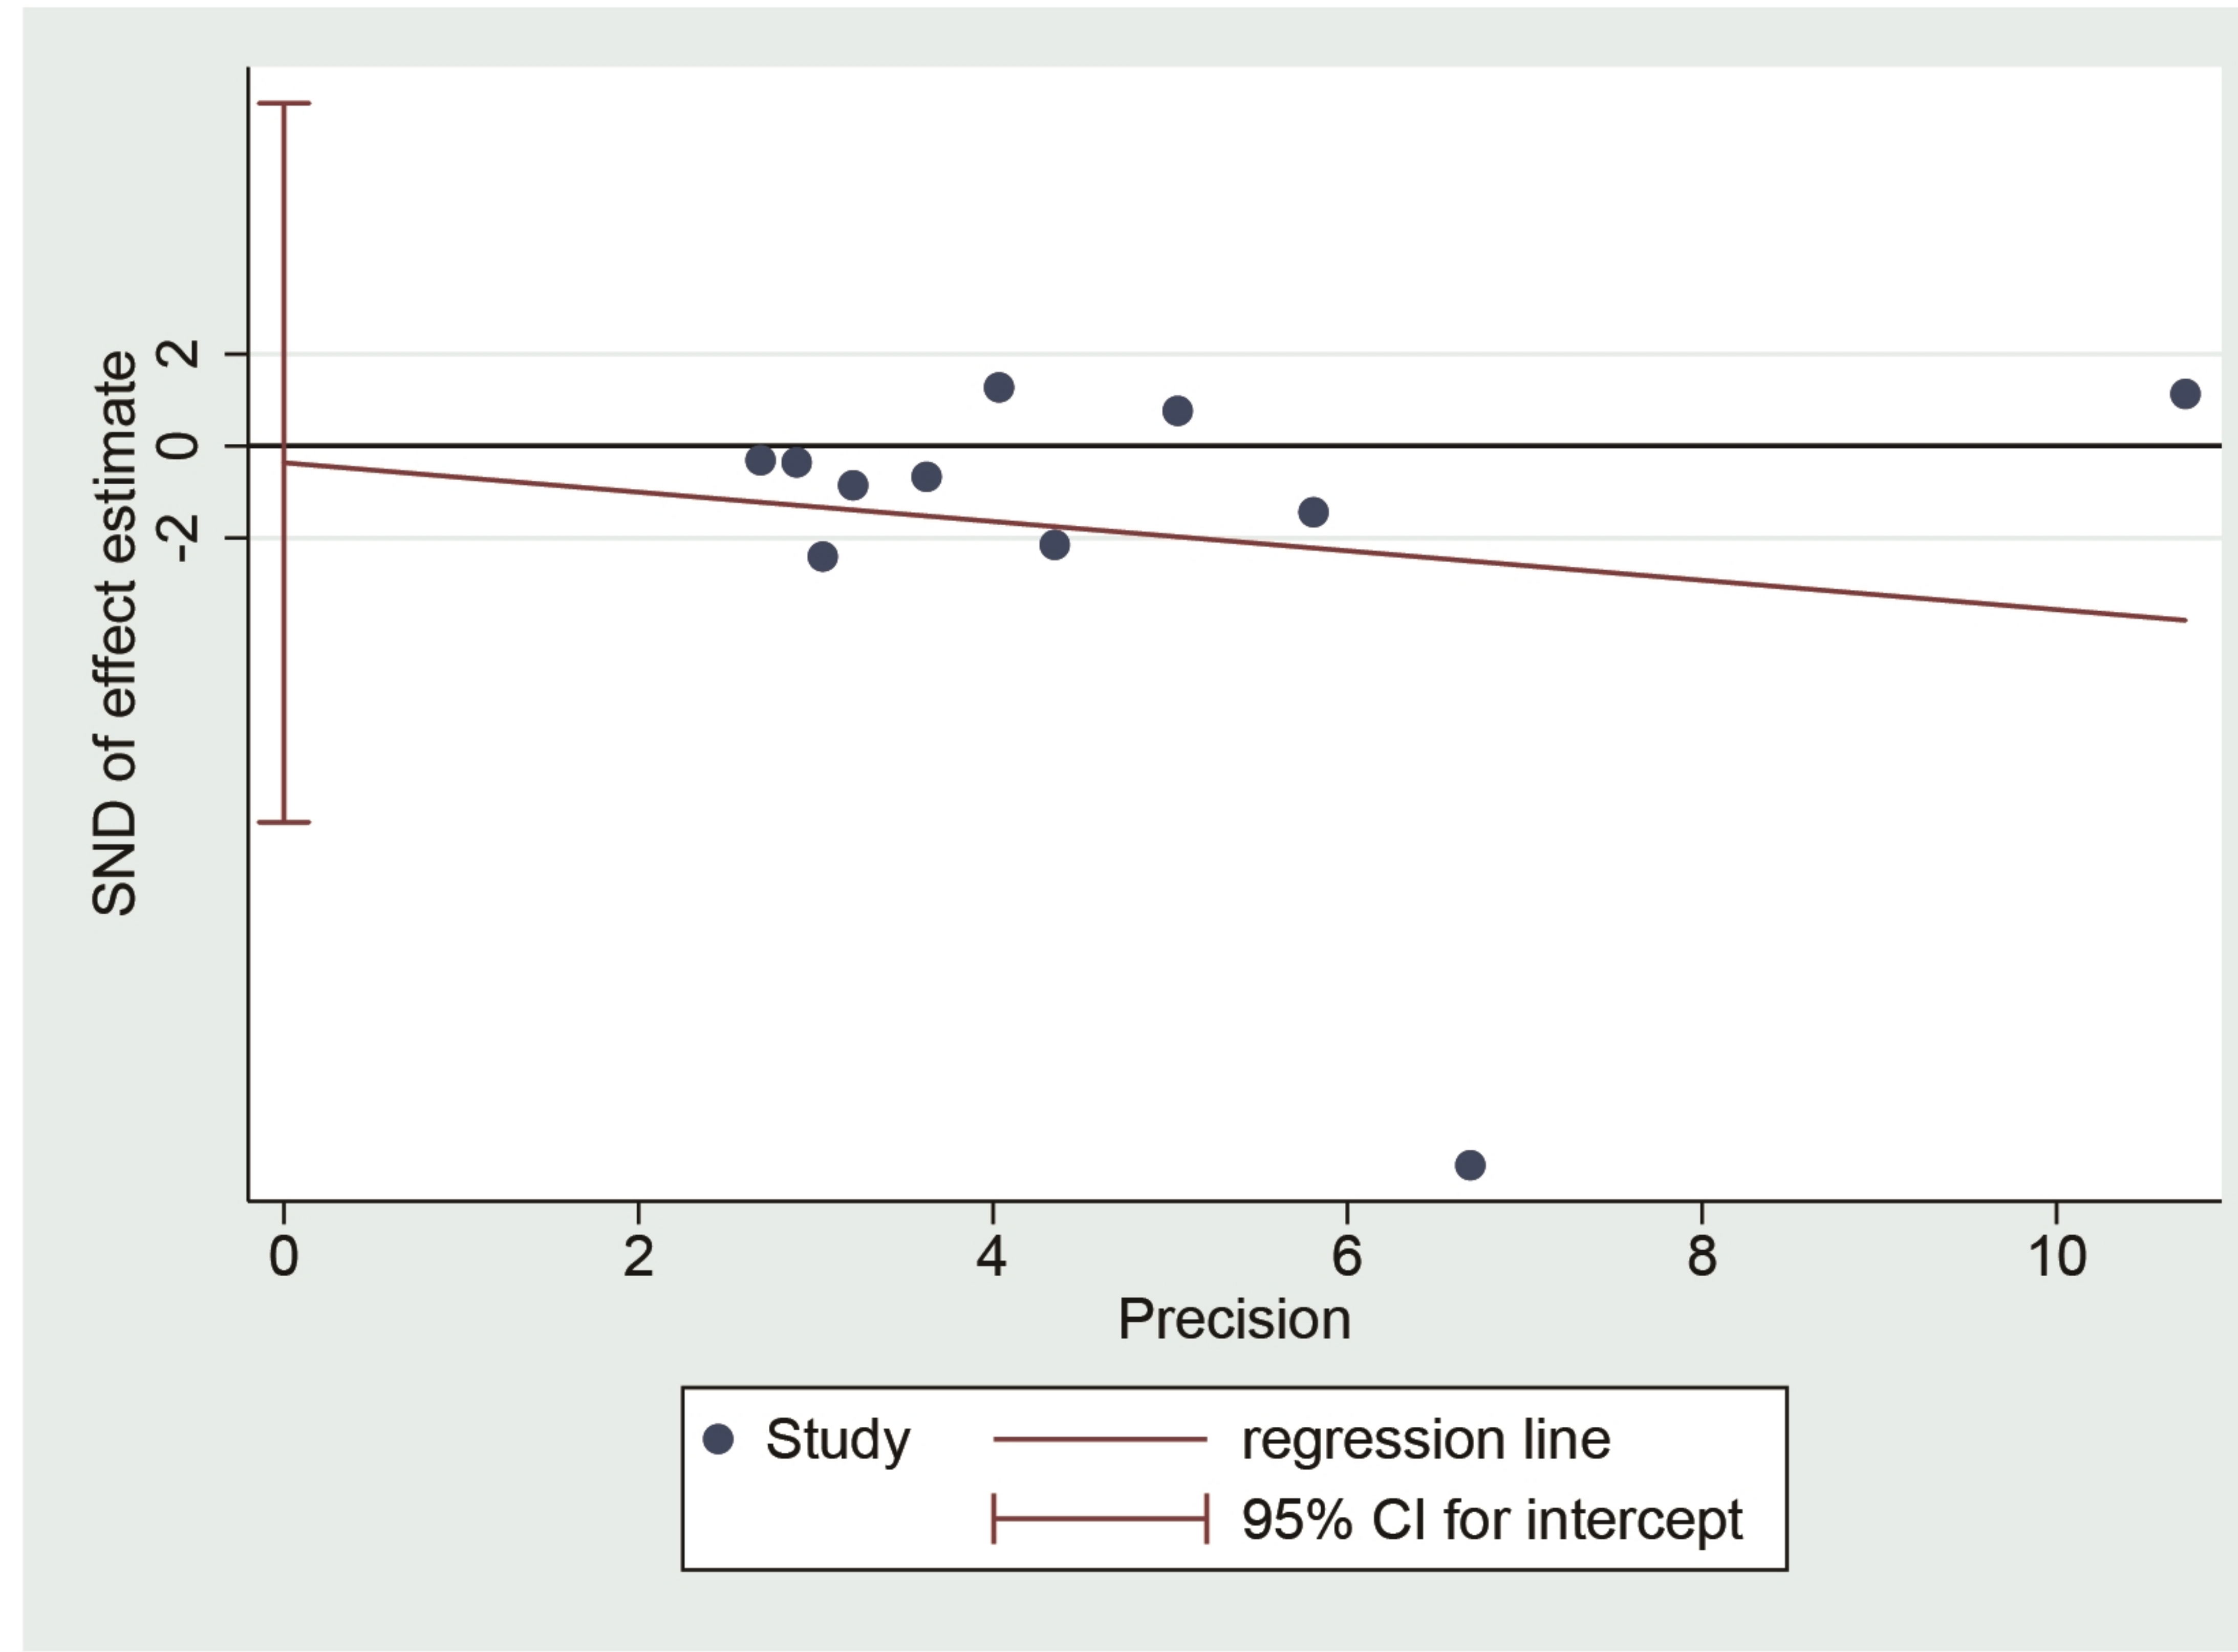

Note: A\_metabias\_ES\_seES, egger(p=0.414); B\_metabias\_ES\_seES, egger(p= 0.919)

A

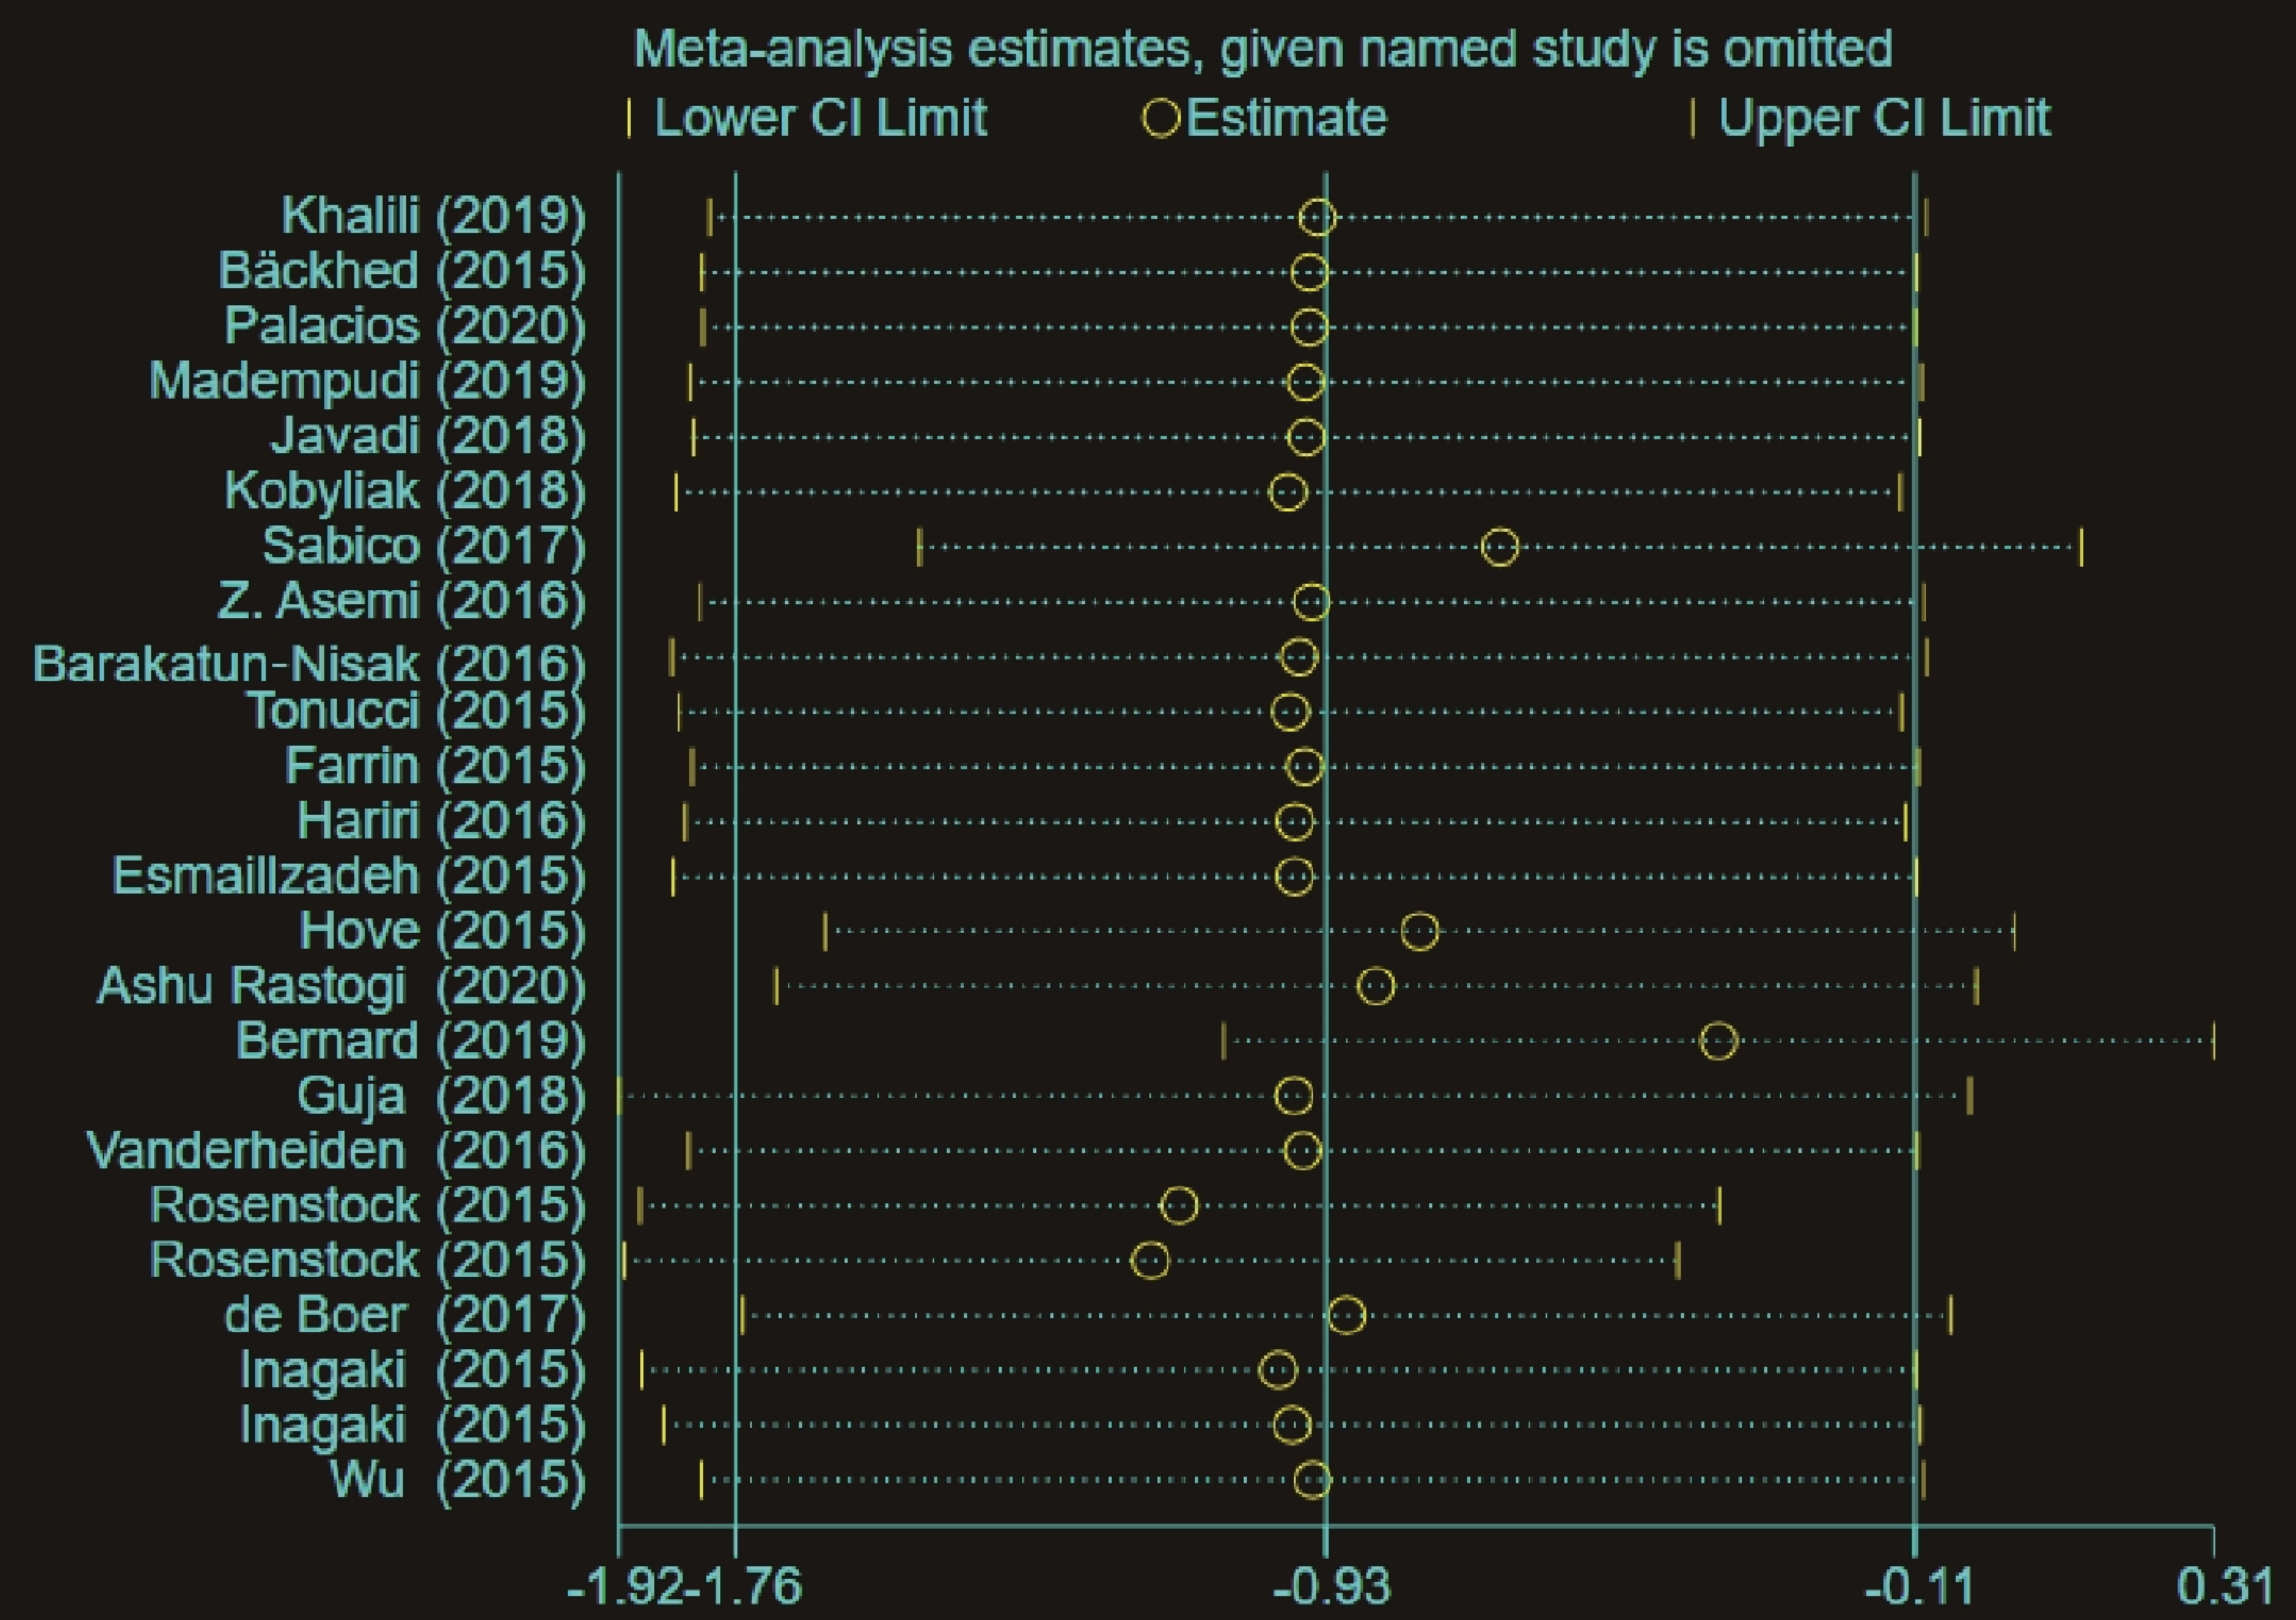

B

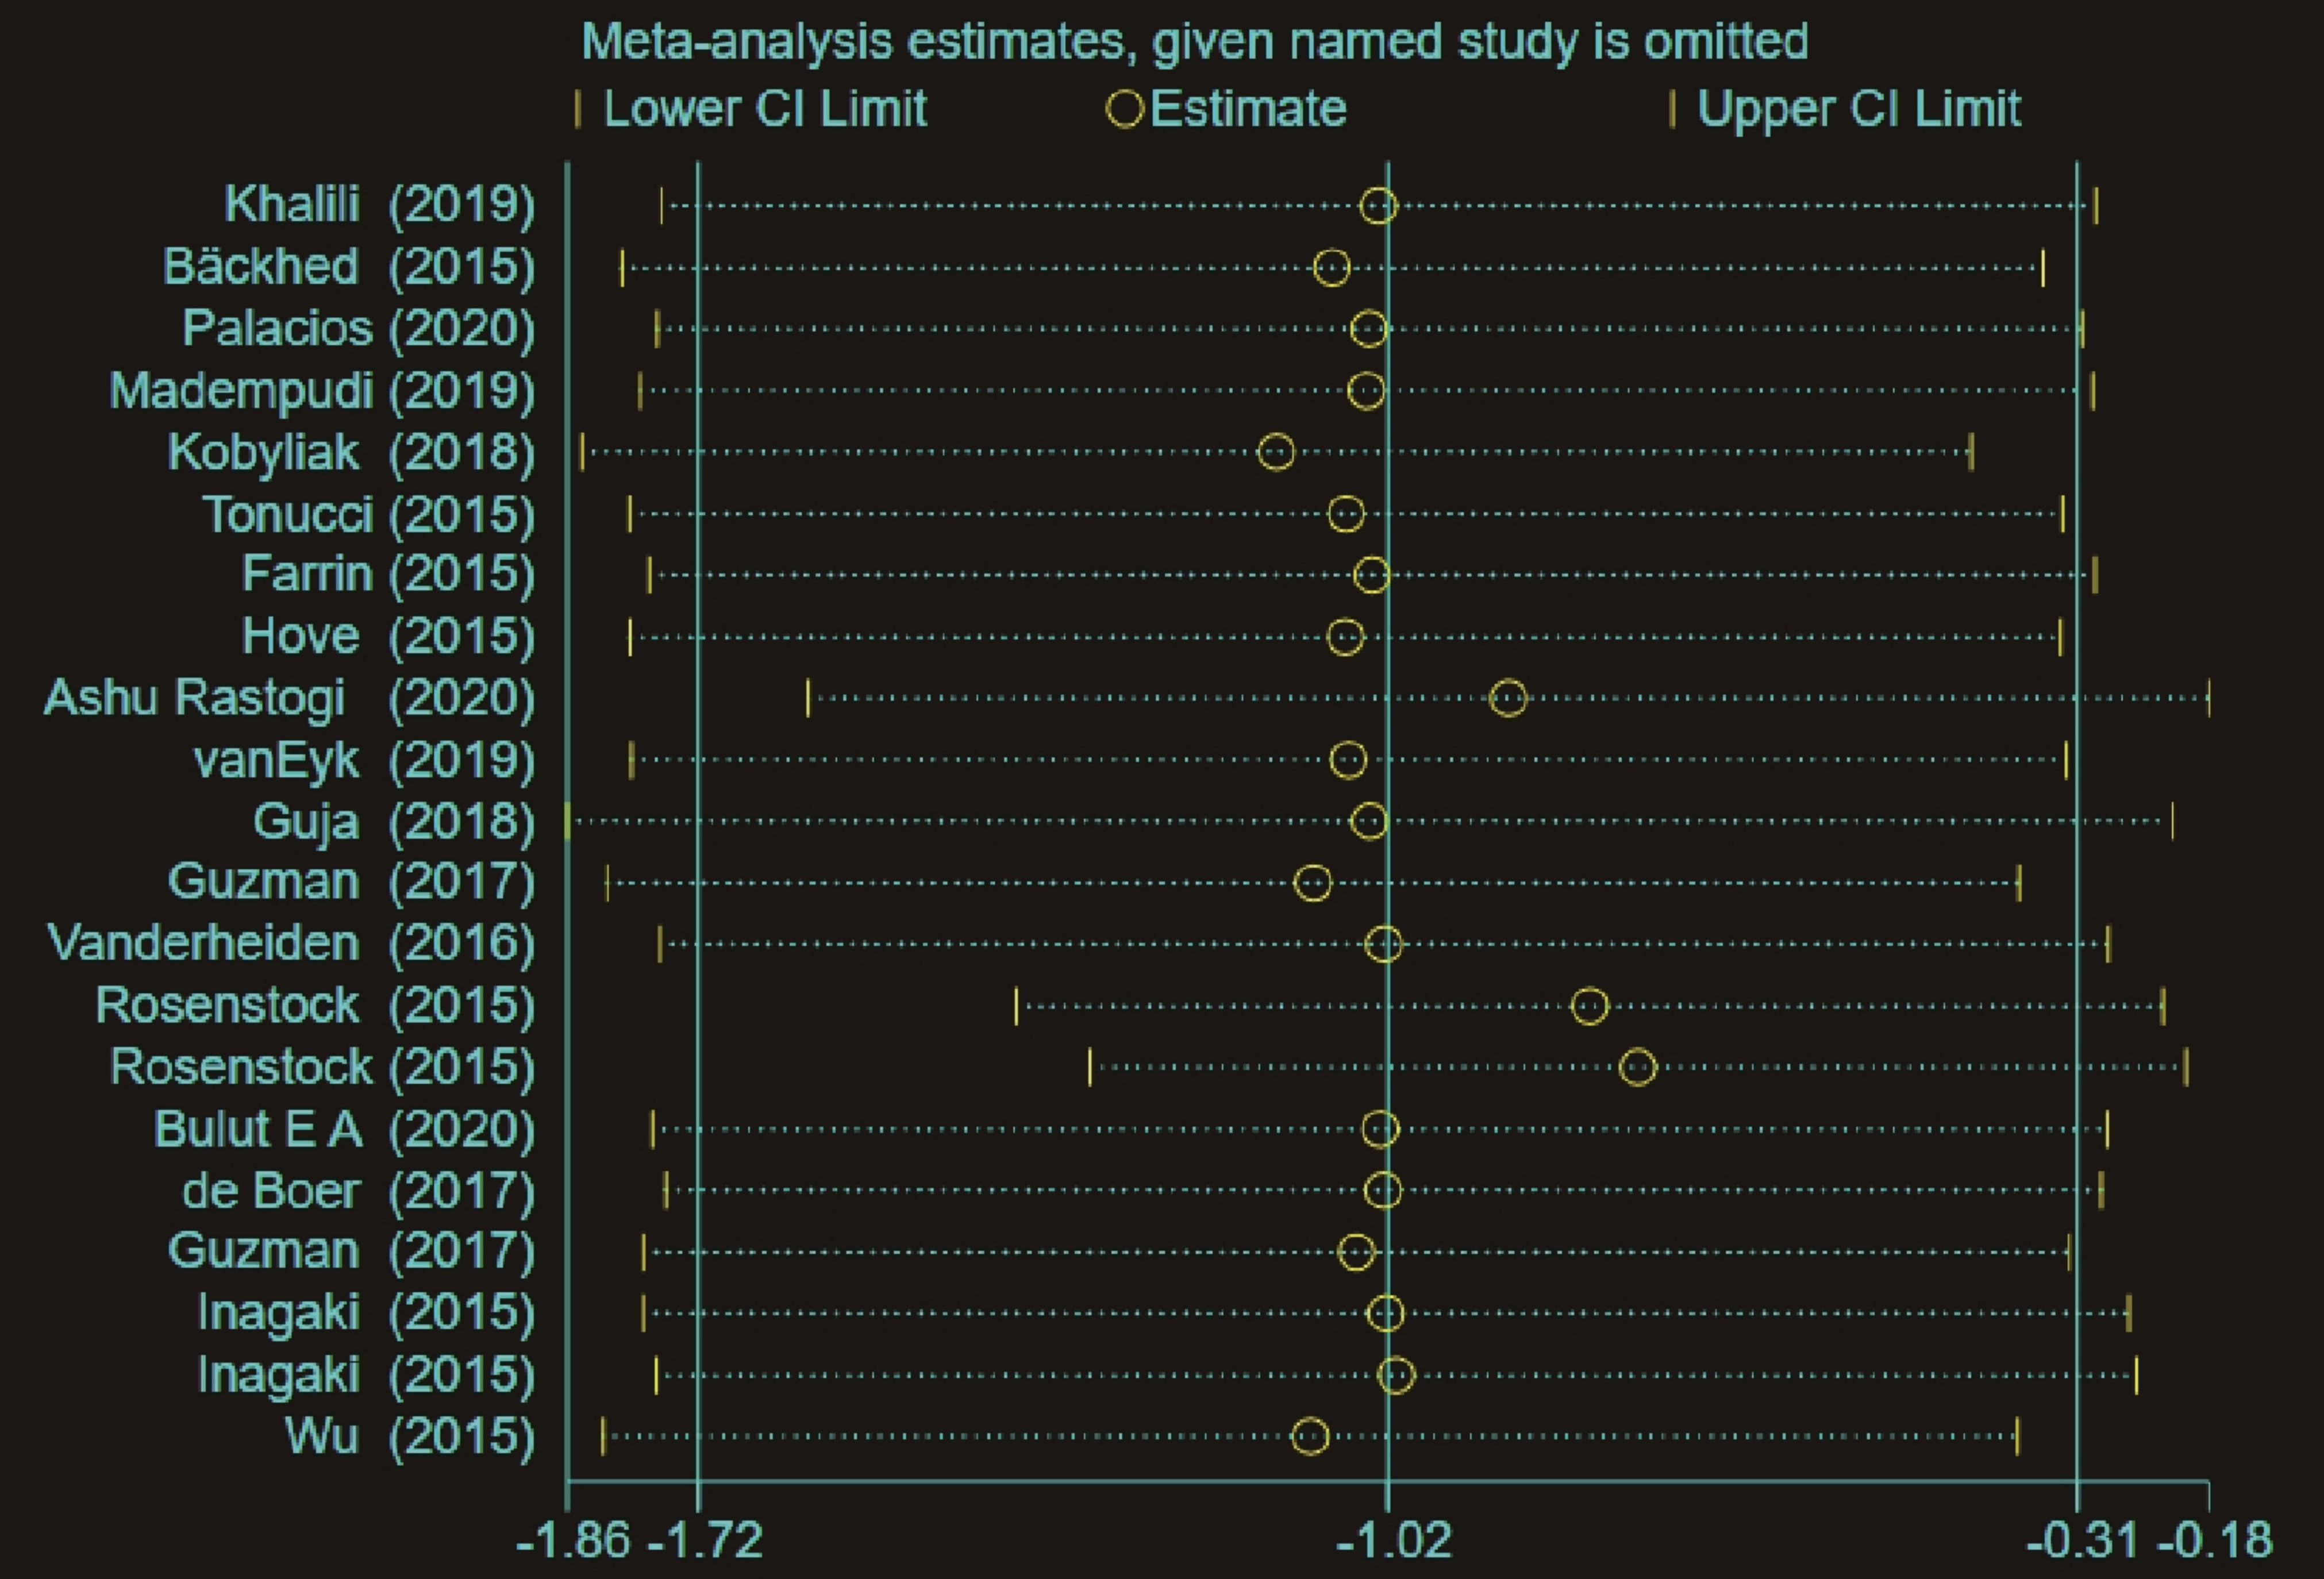

C

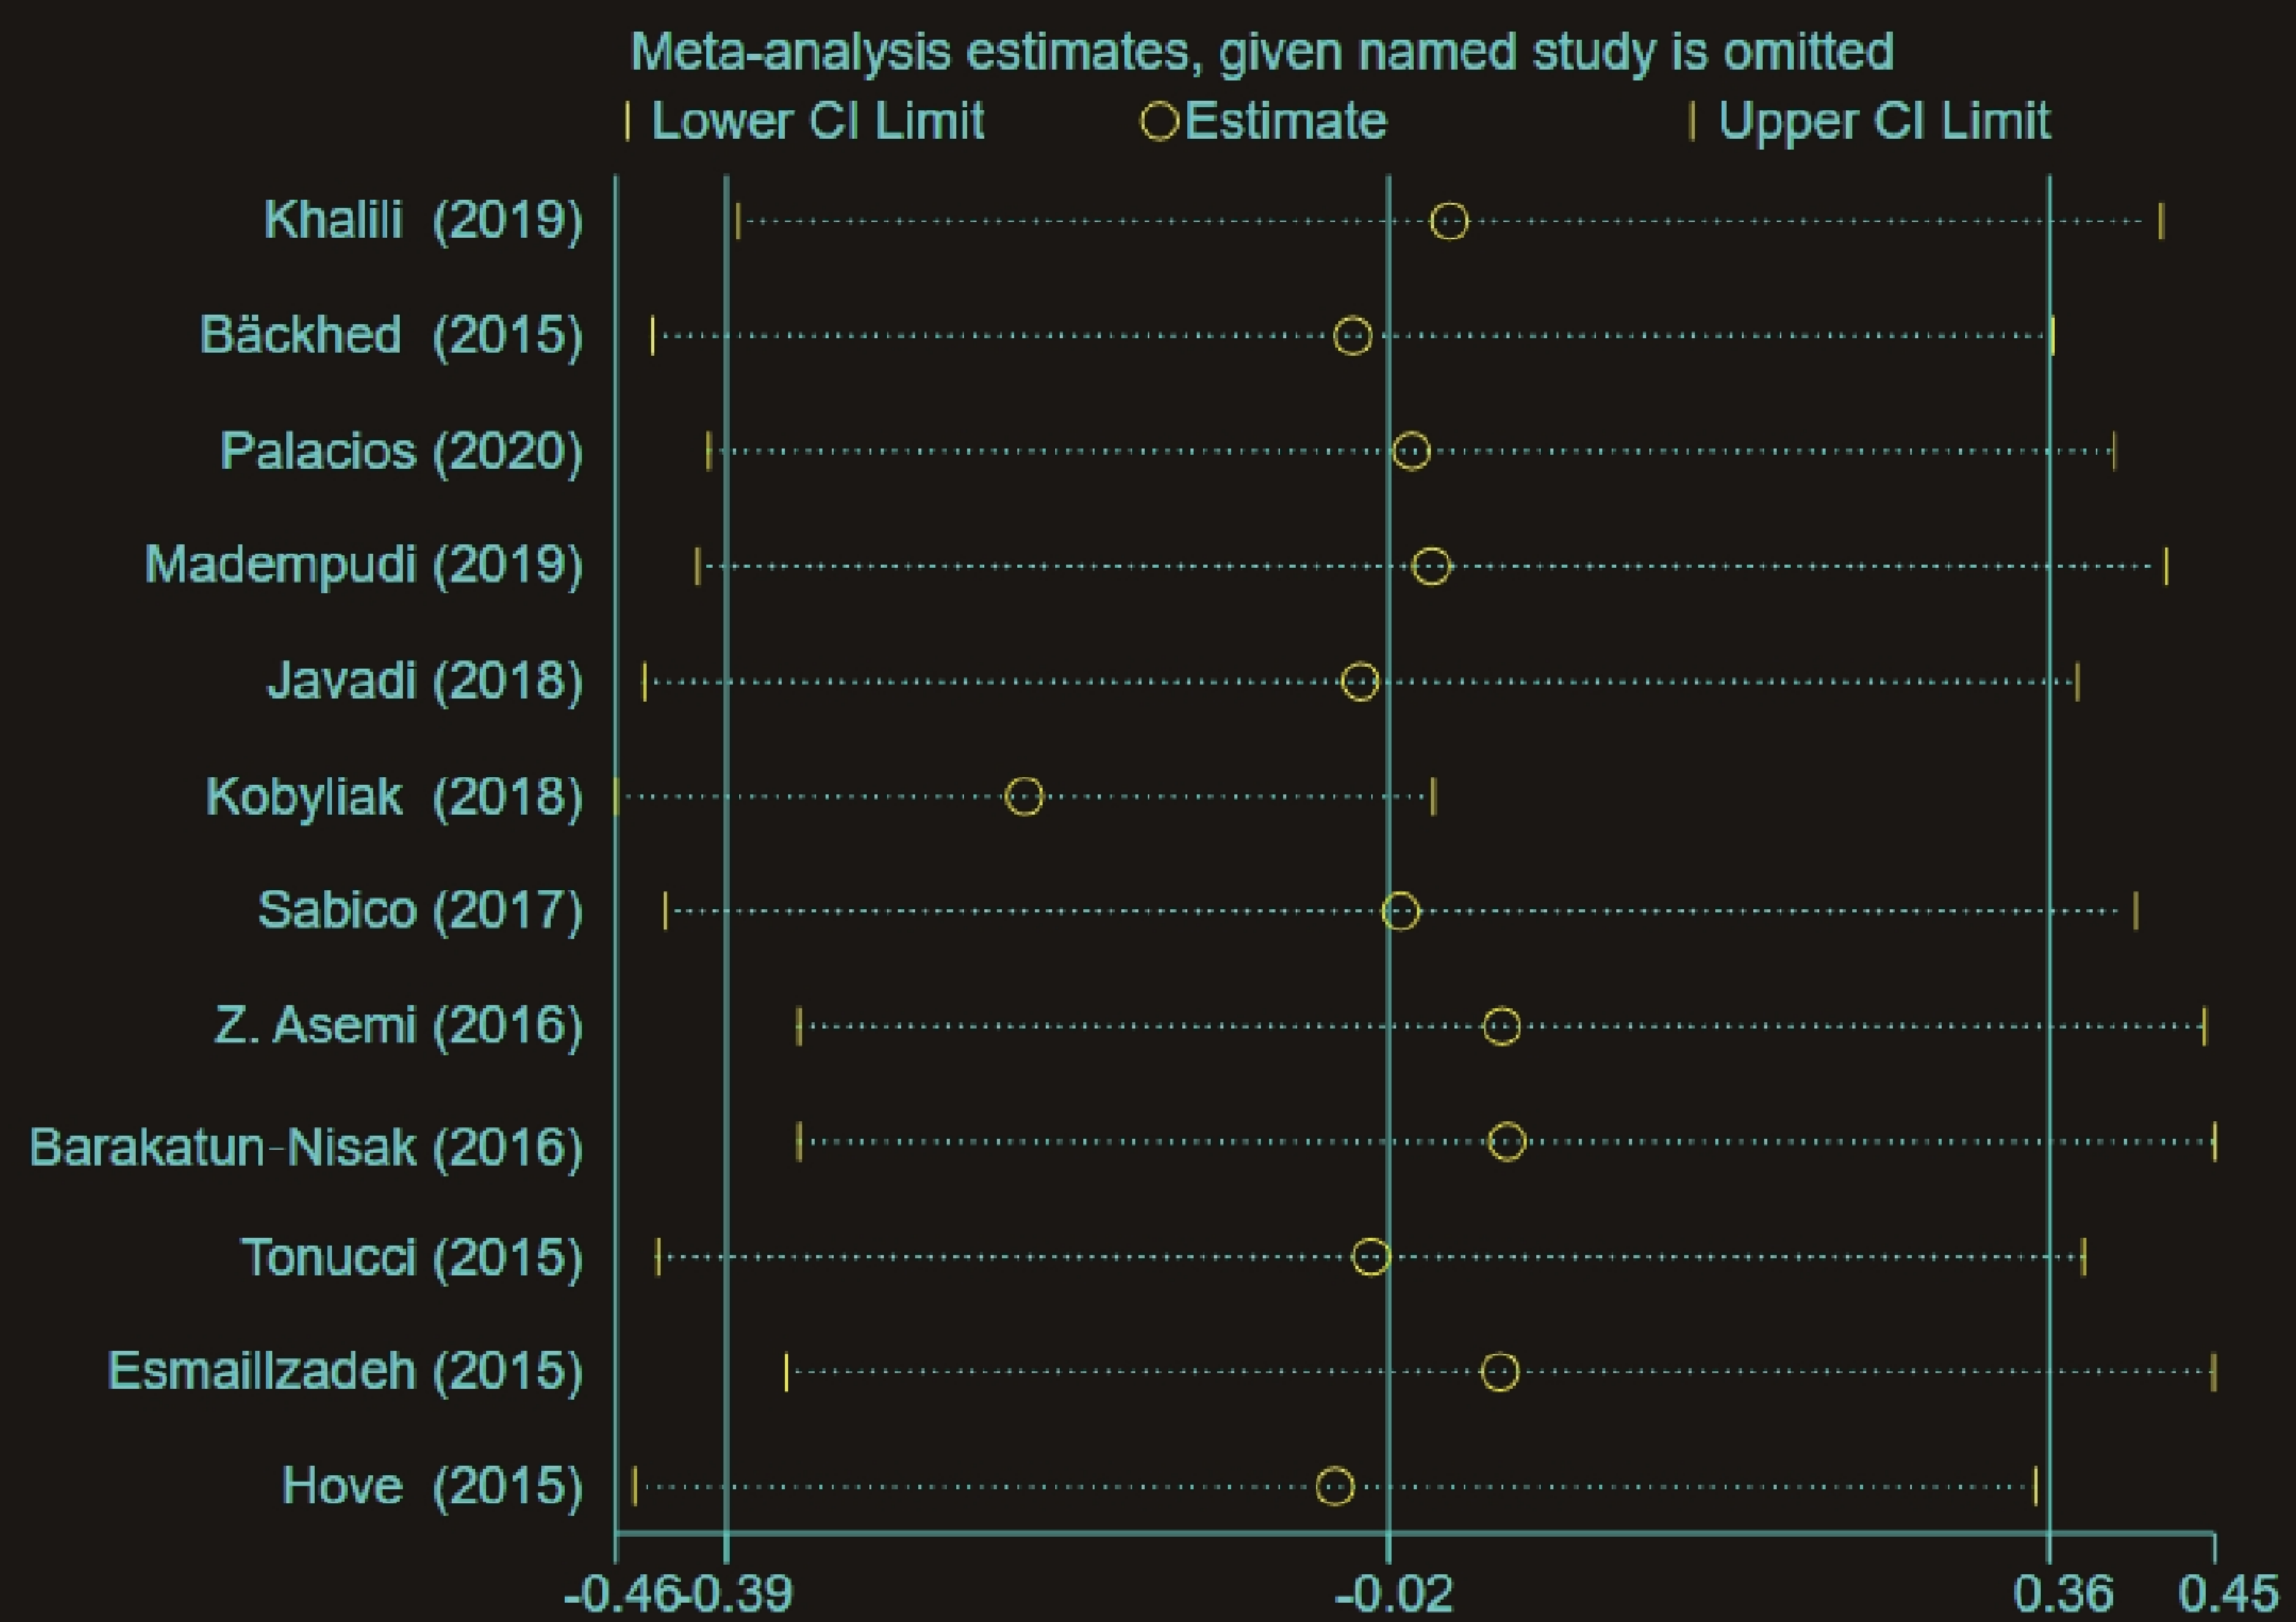

D

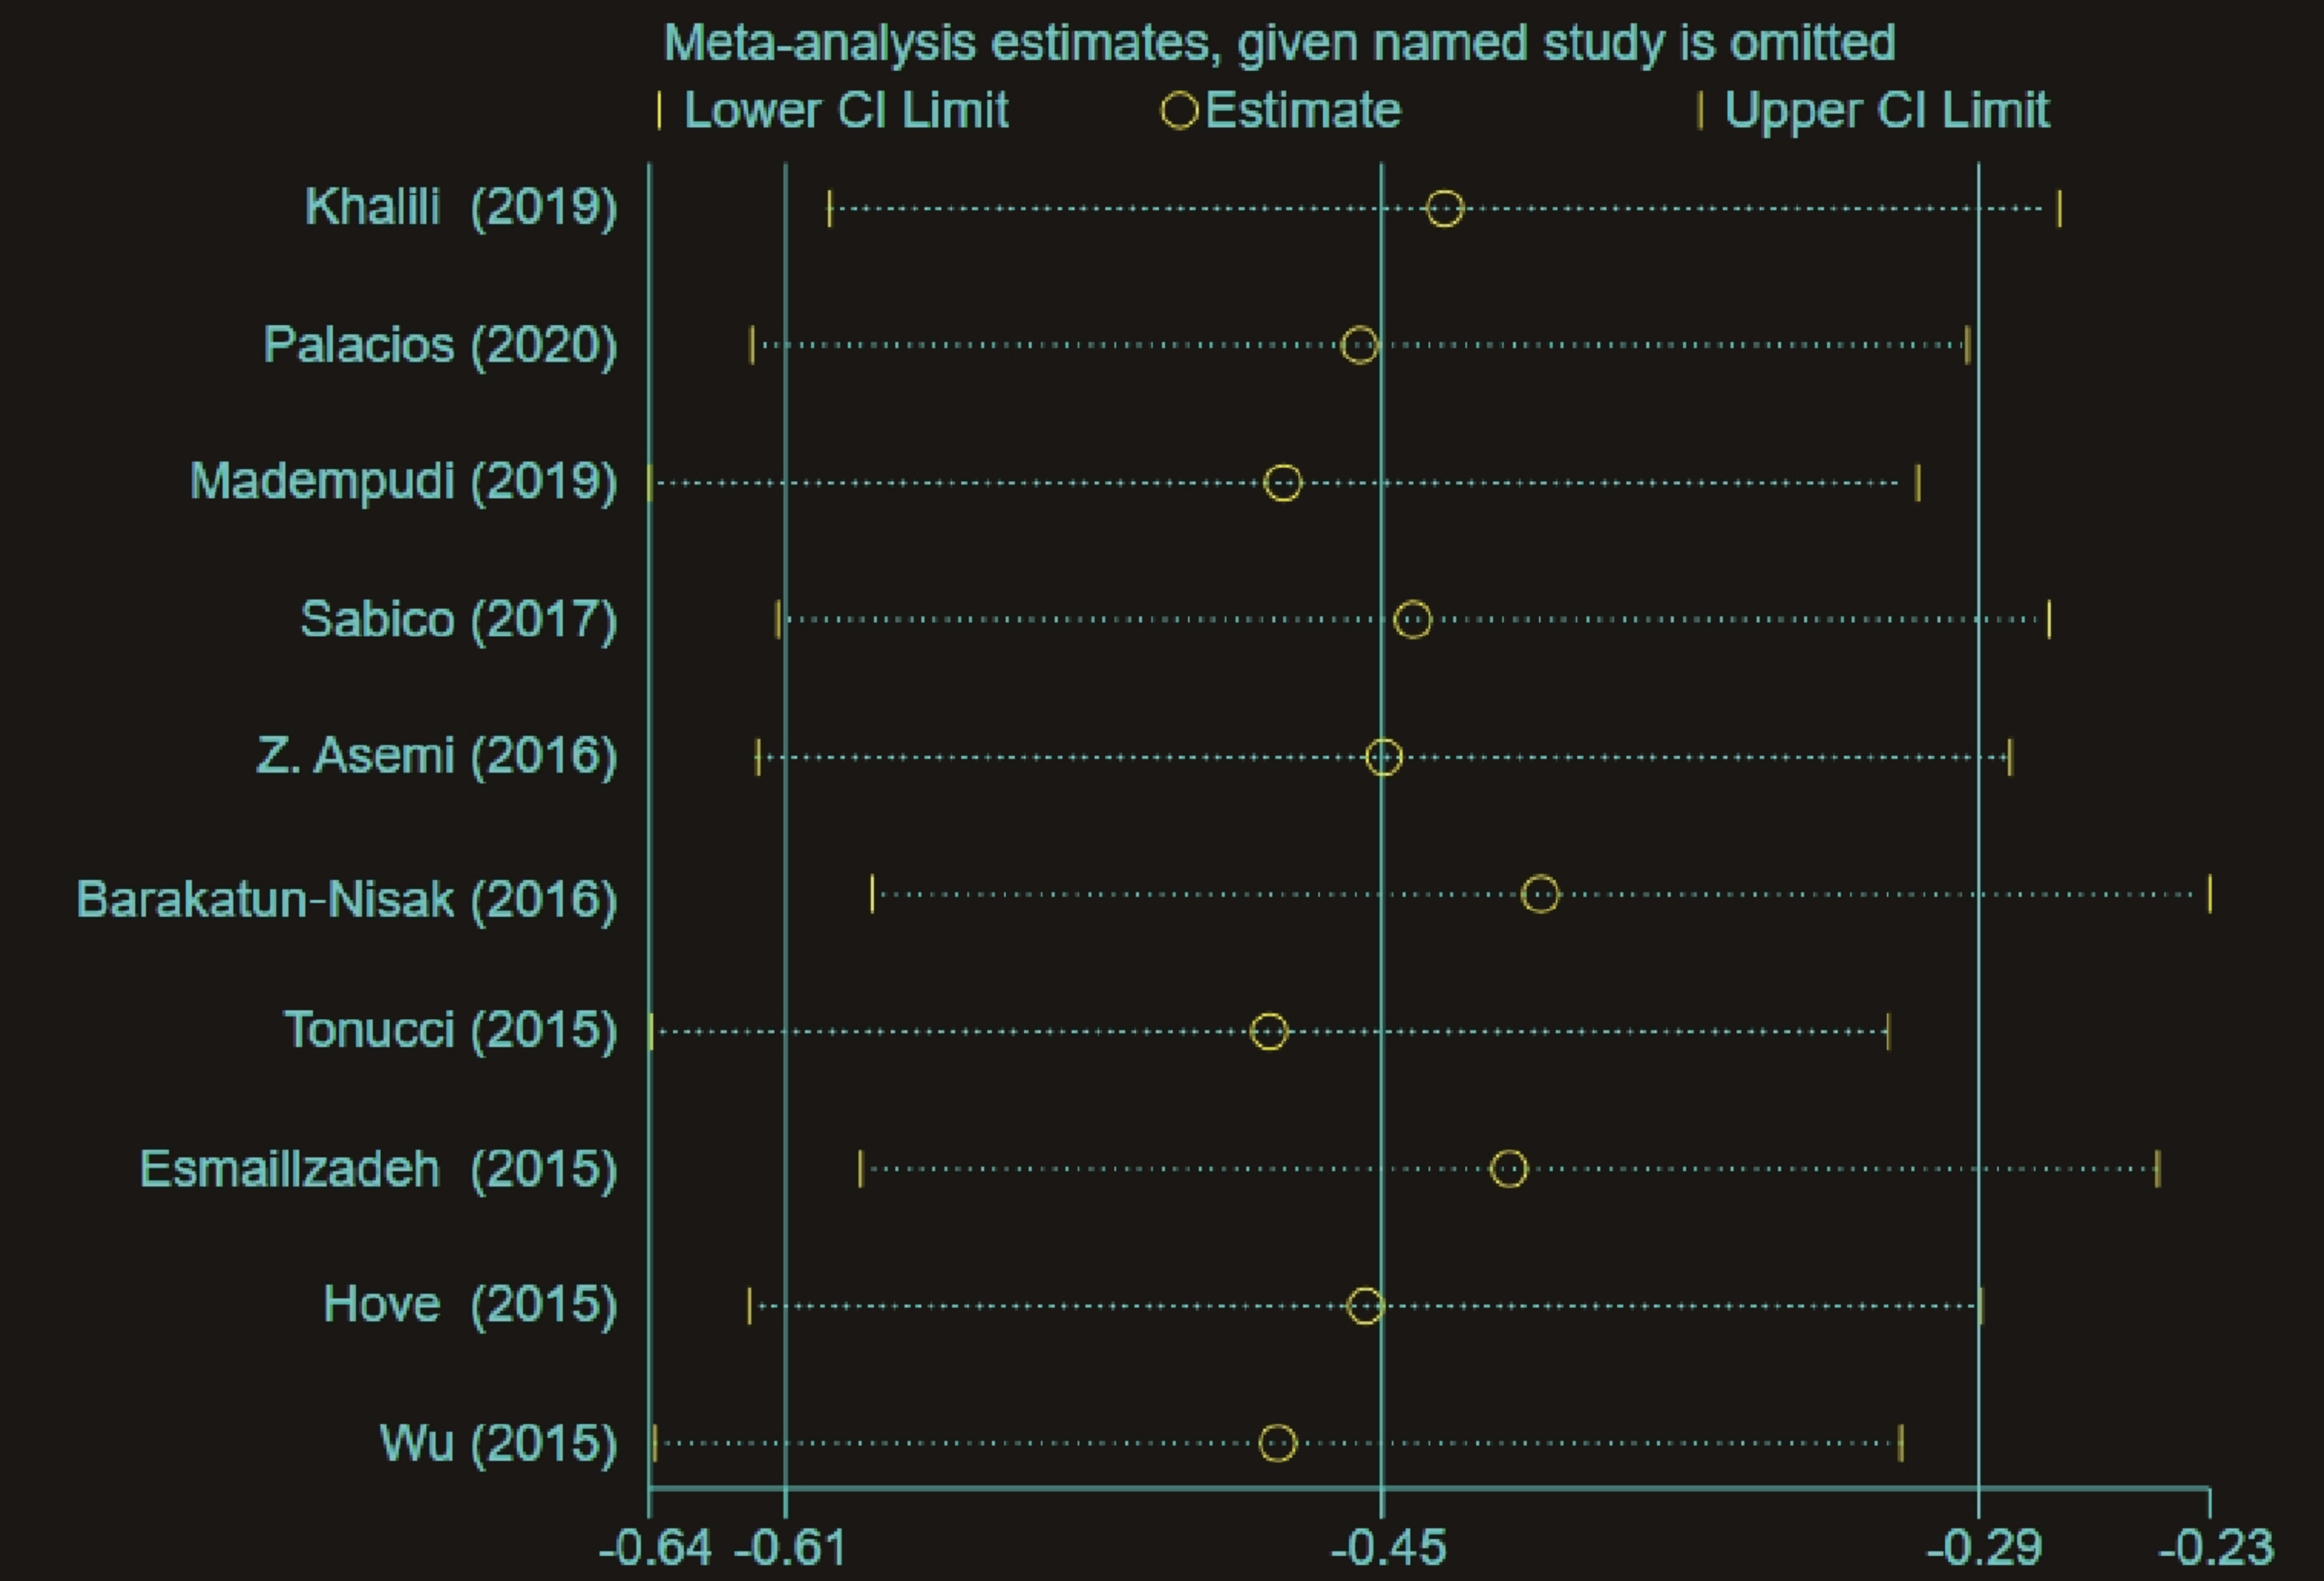

A

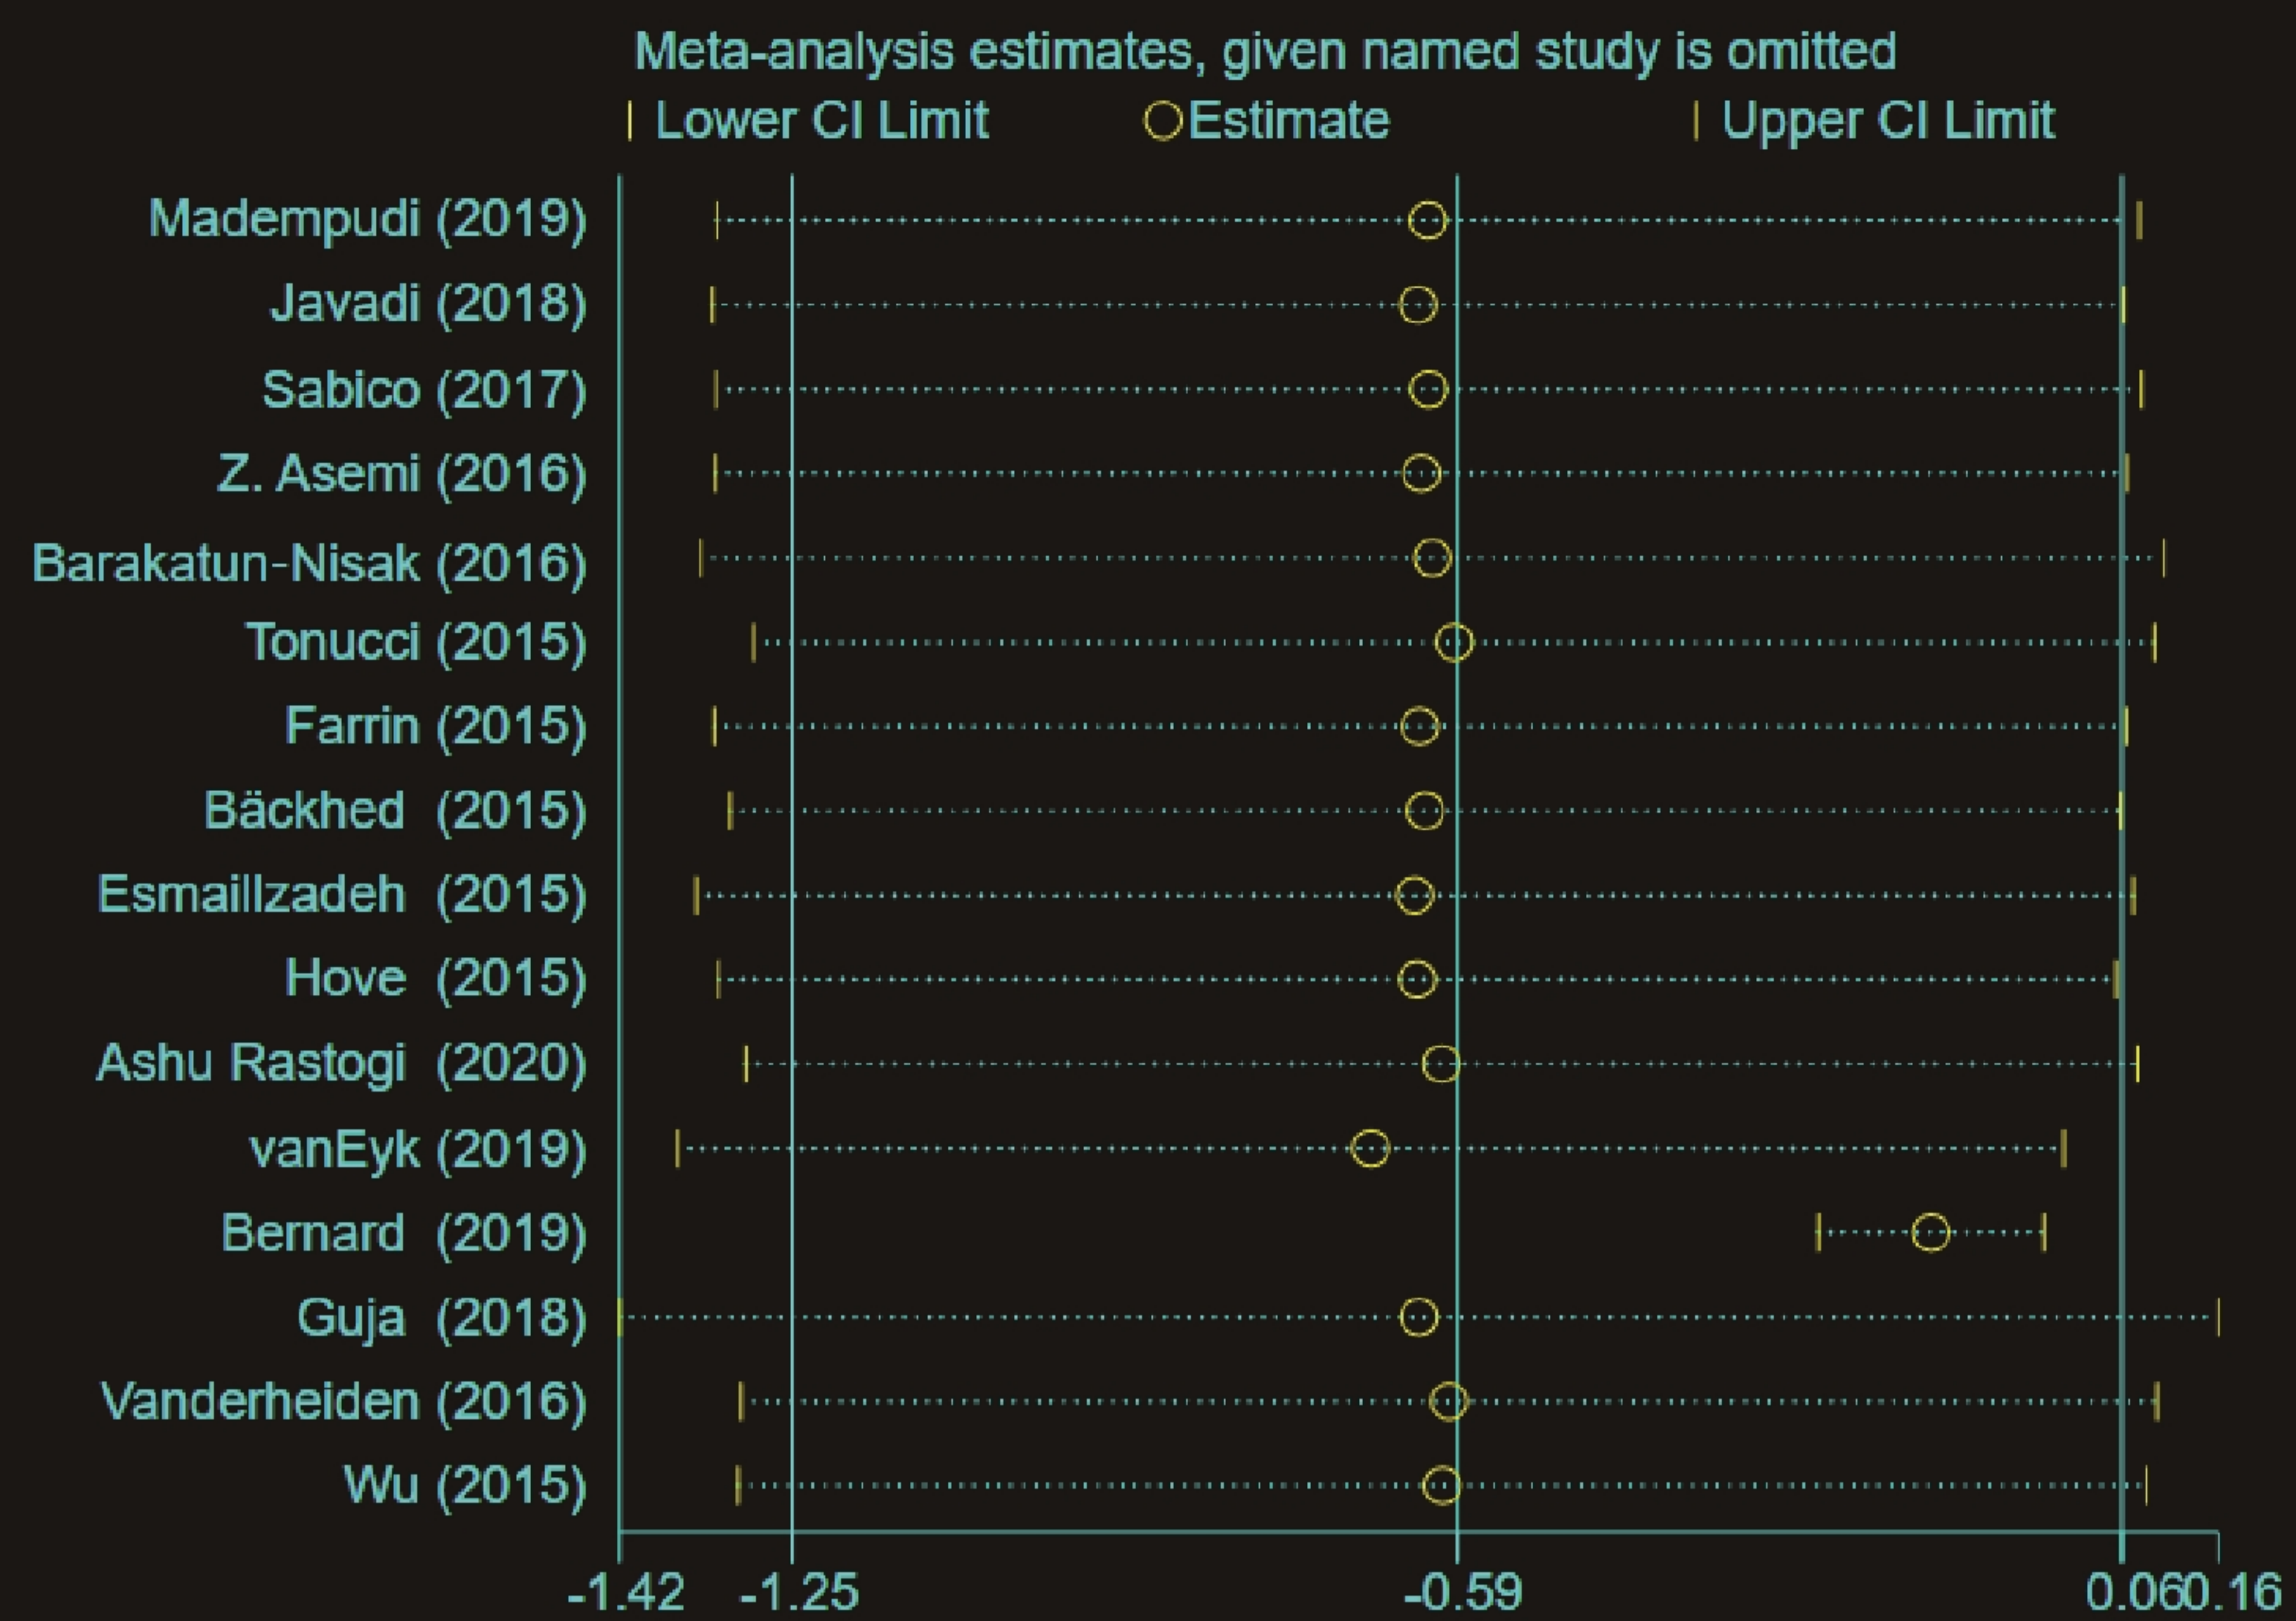

B

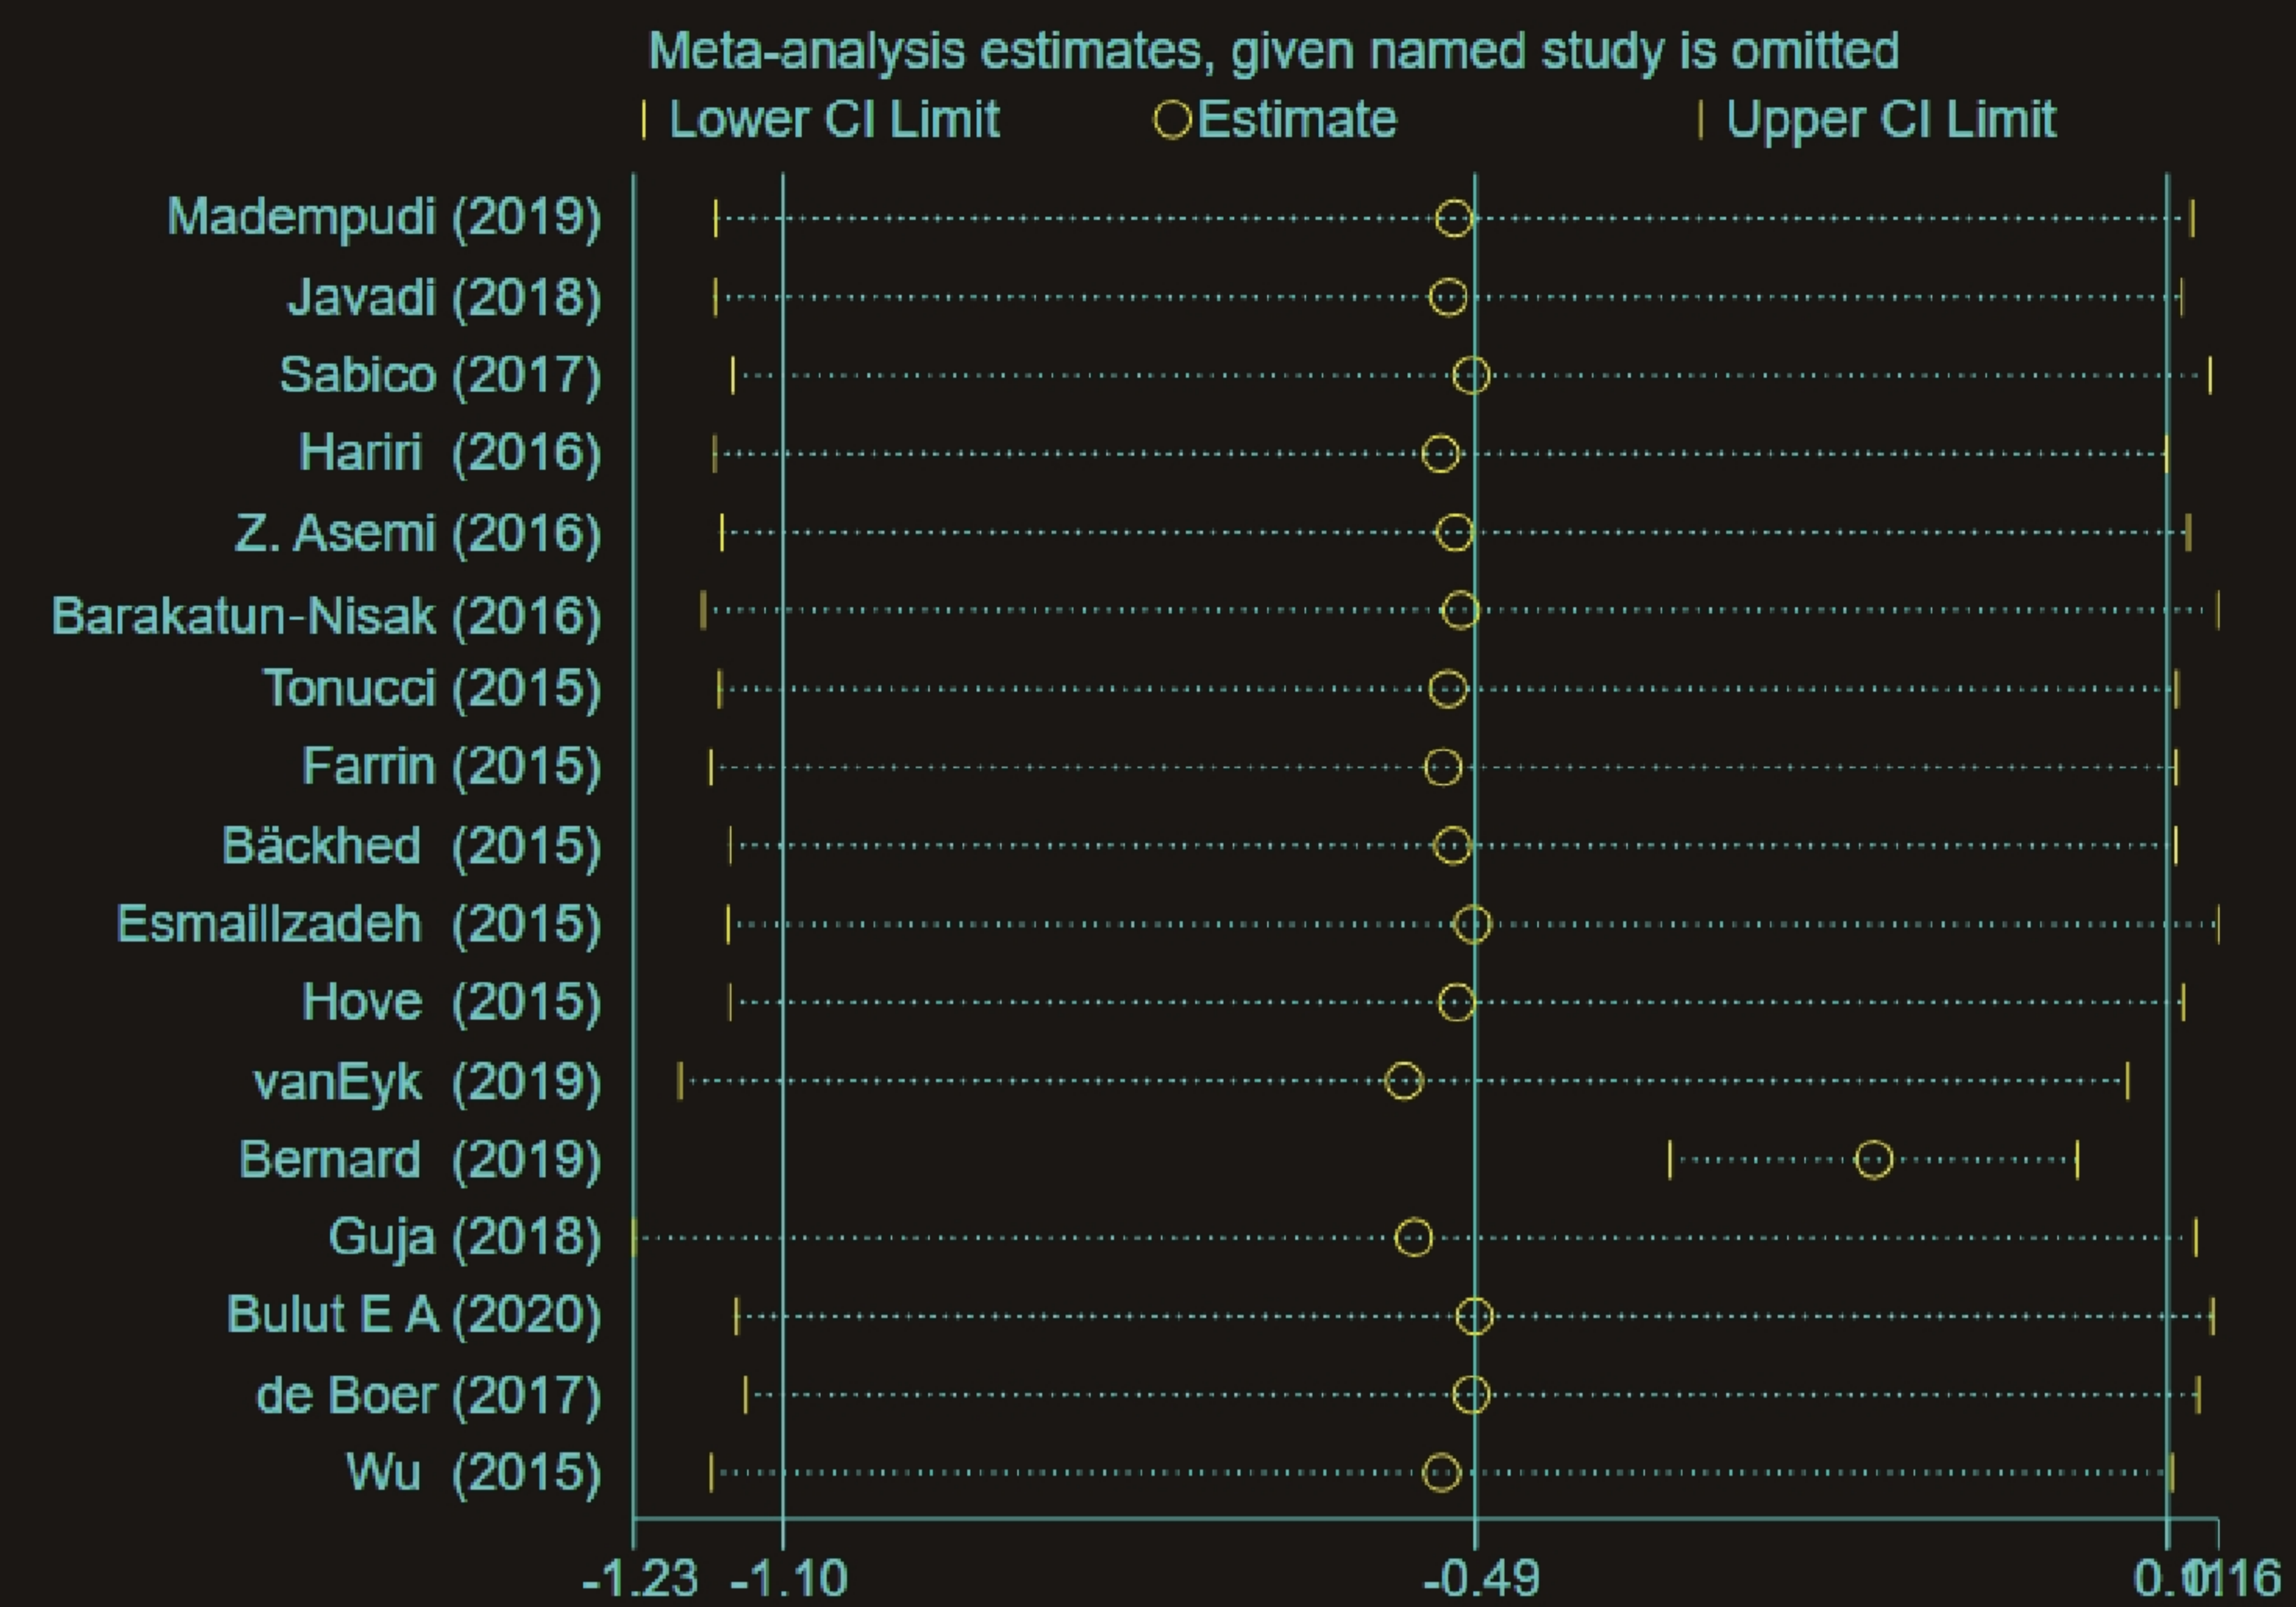

C

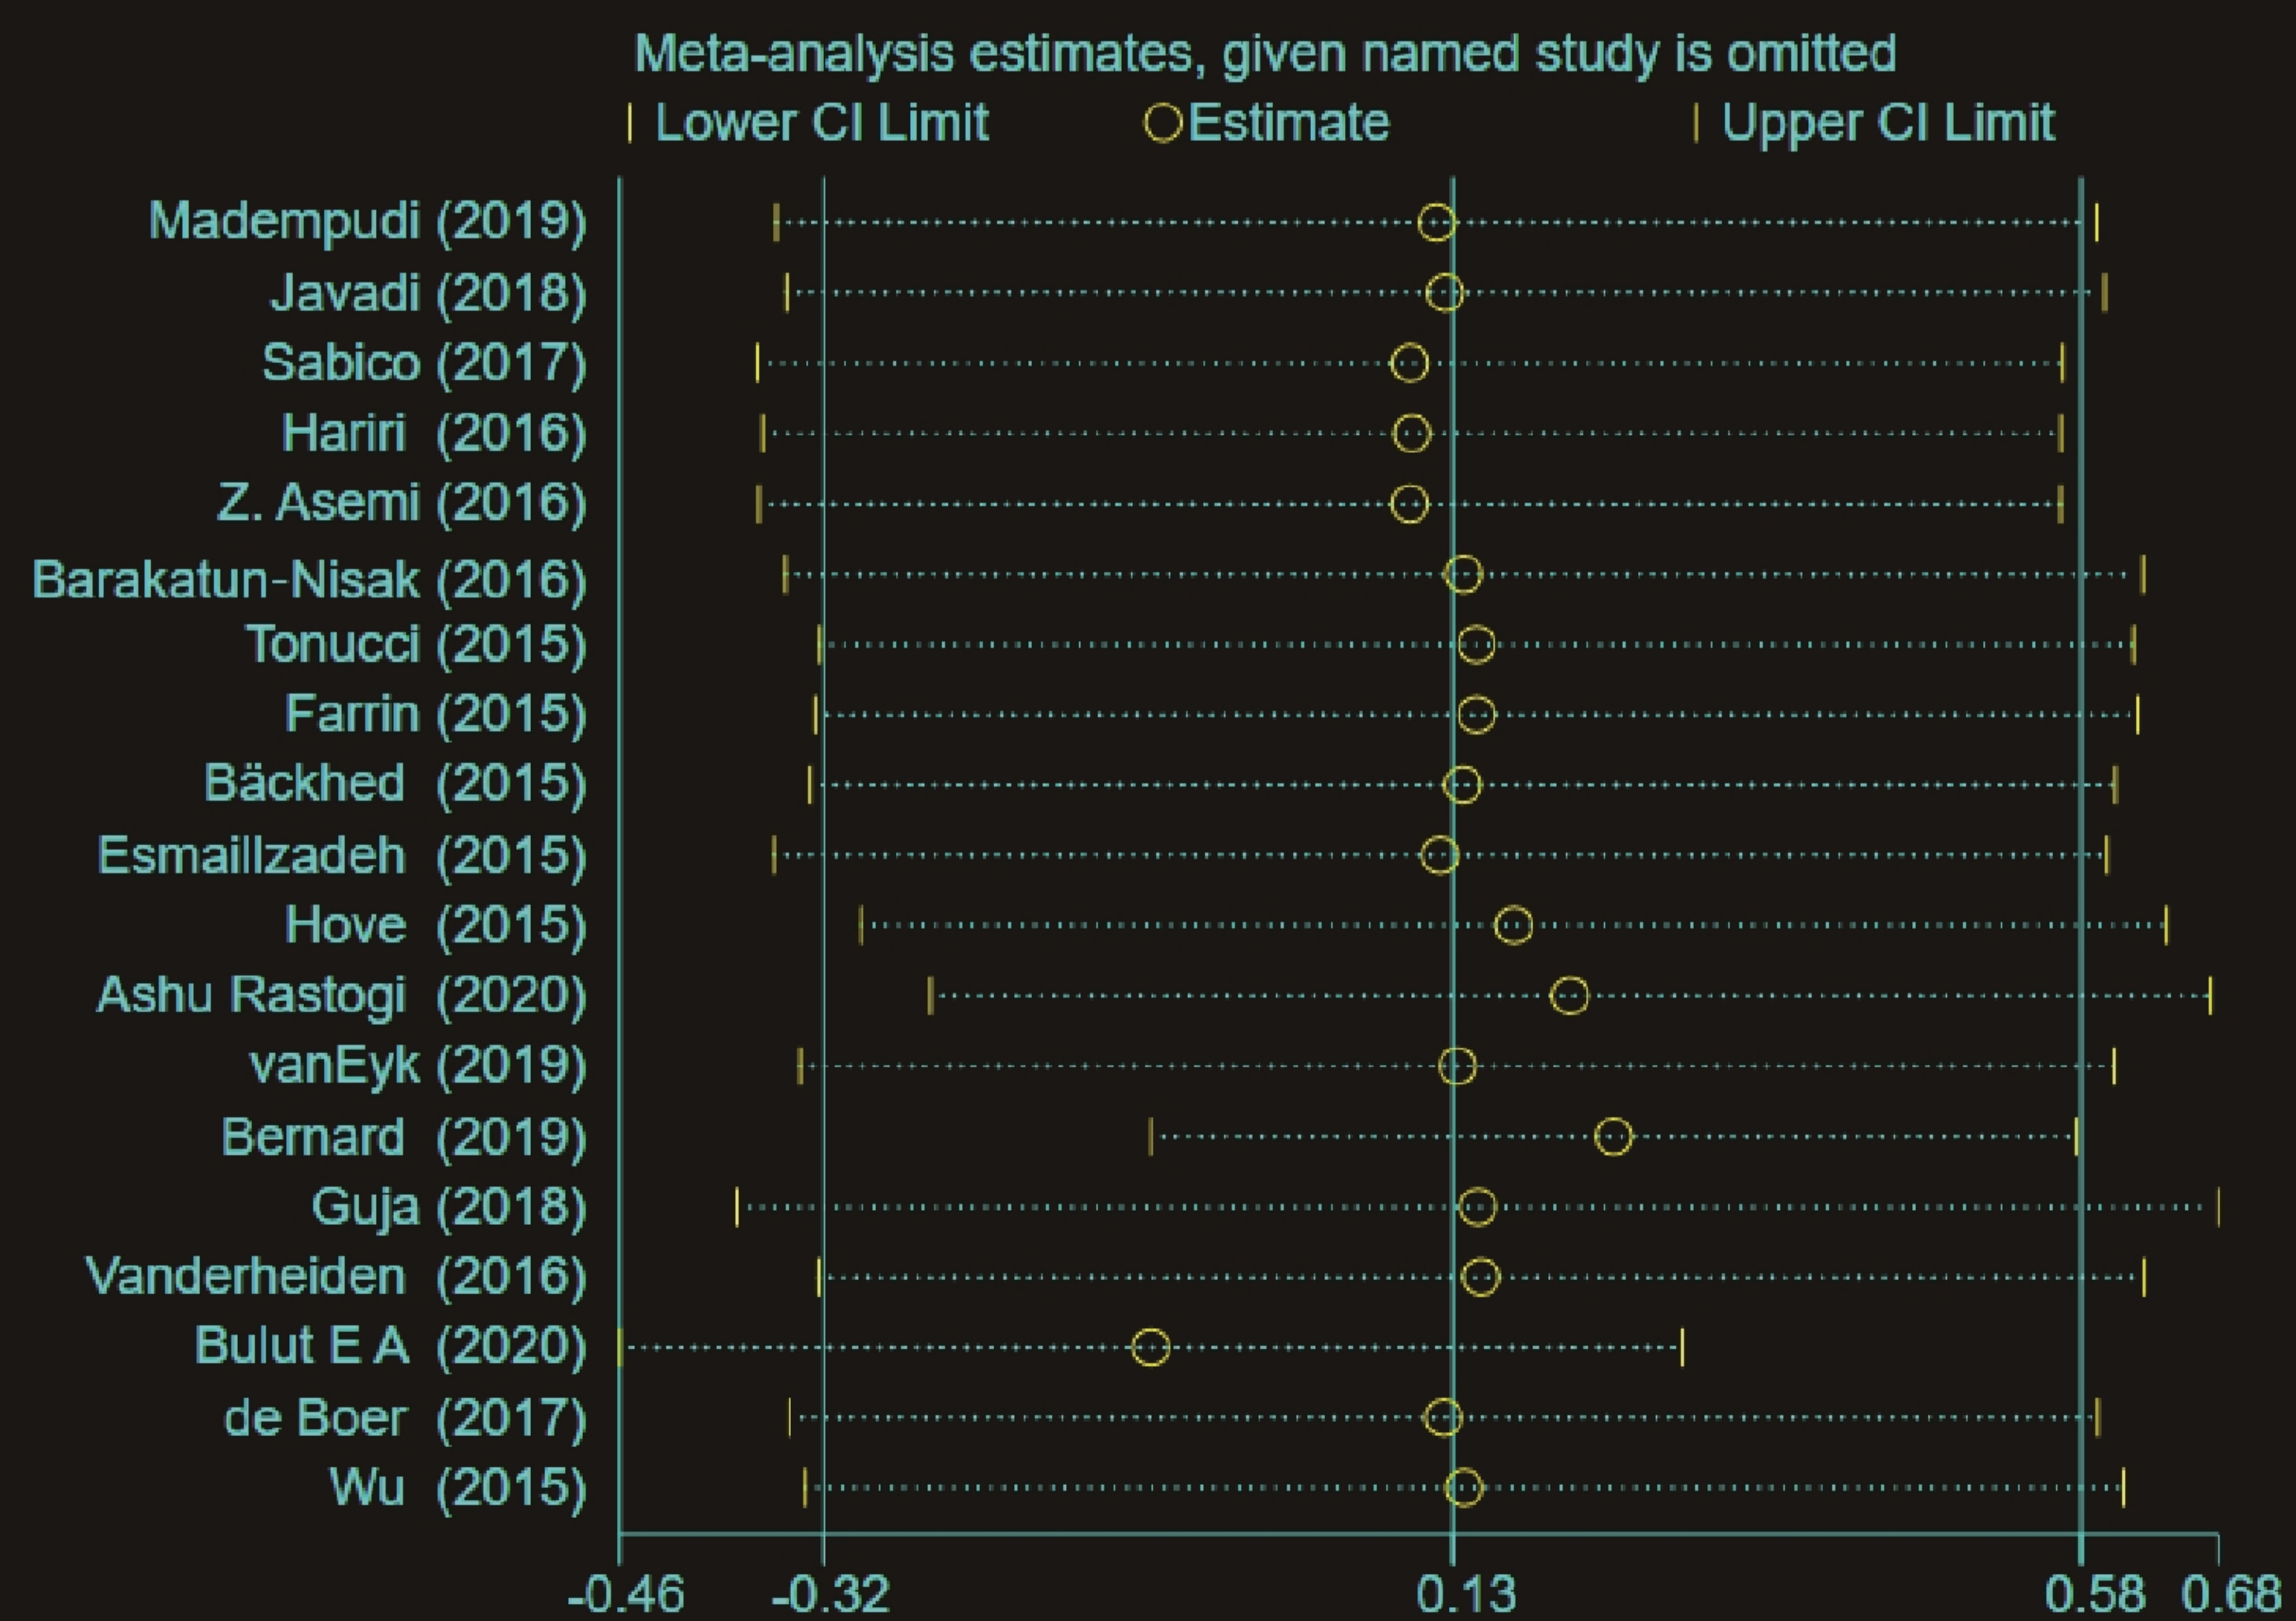

D

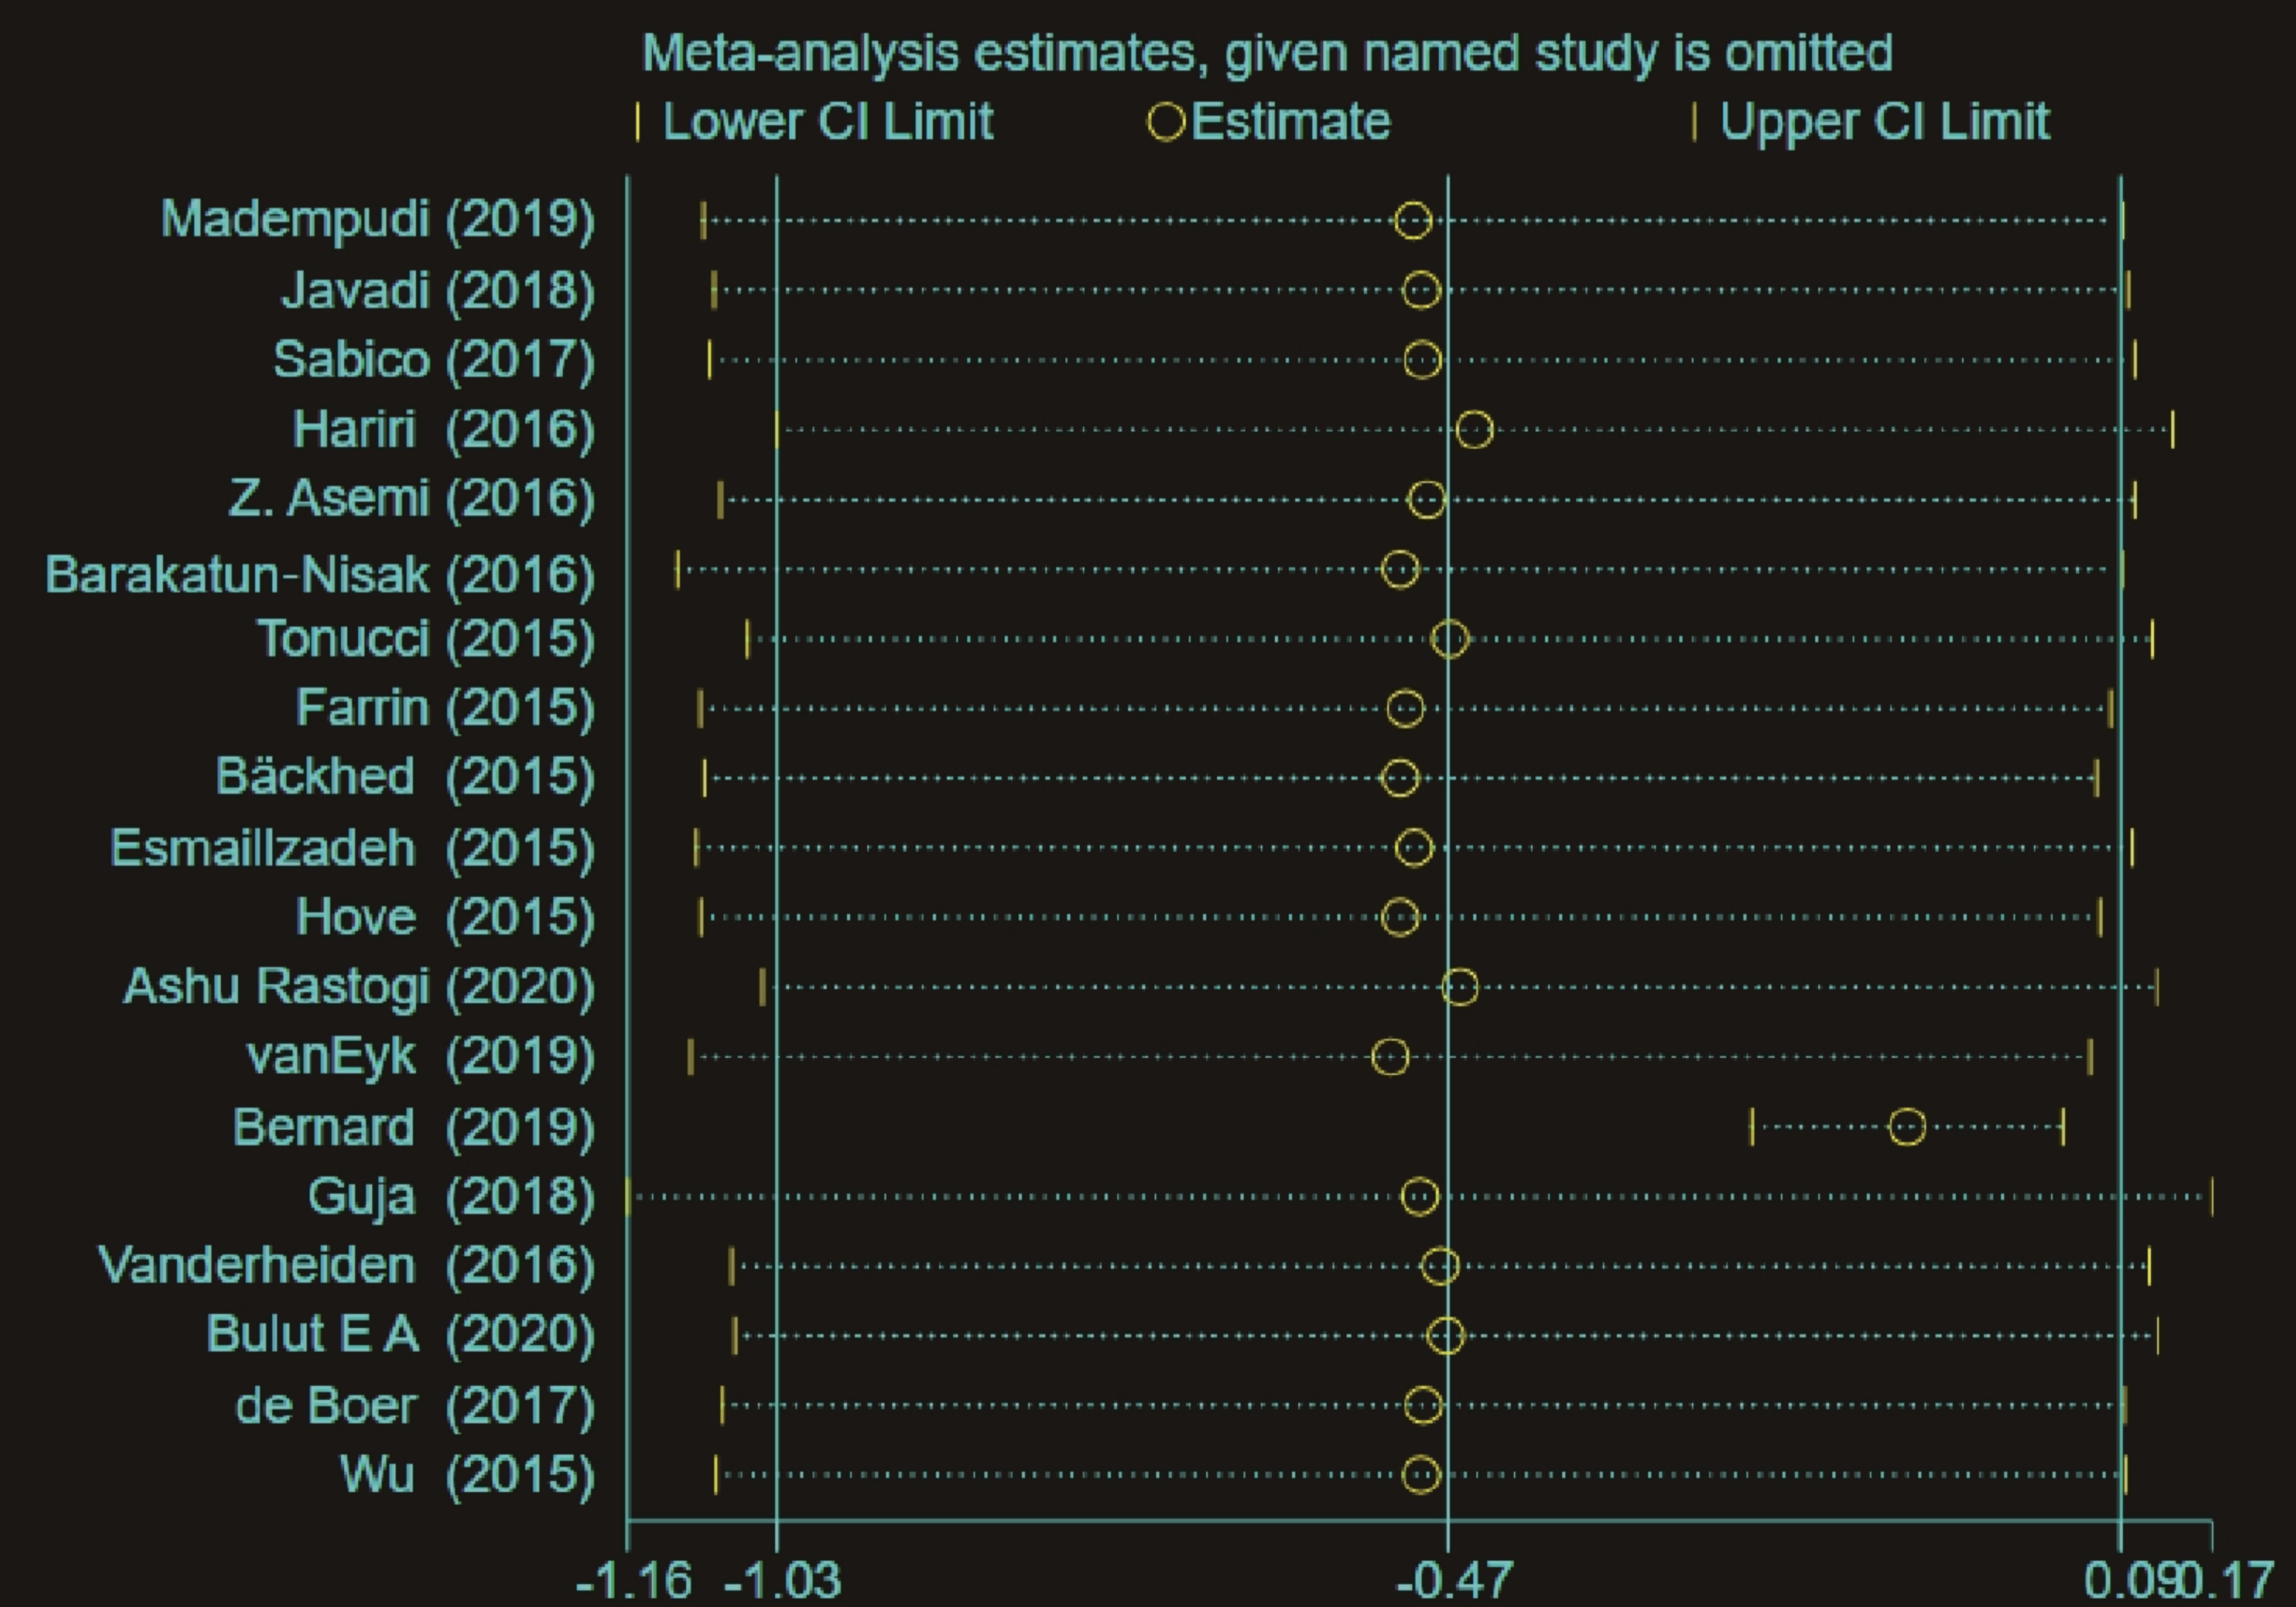

A

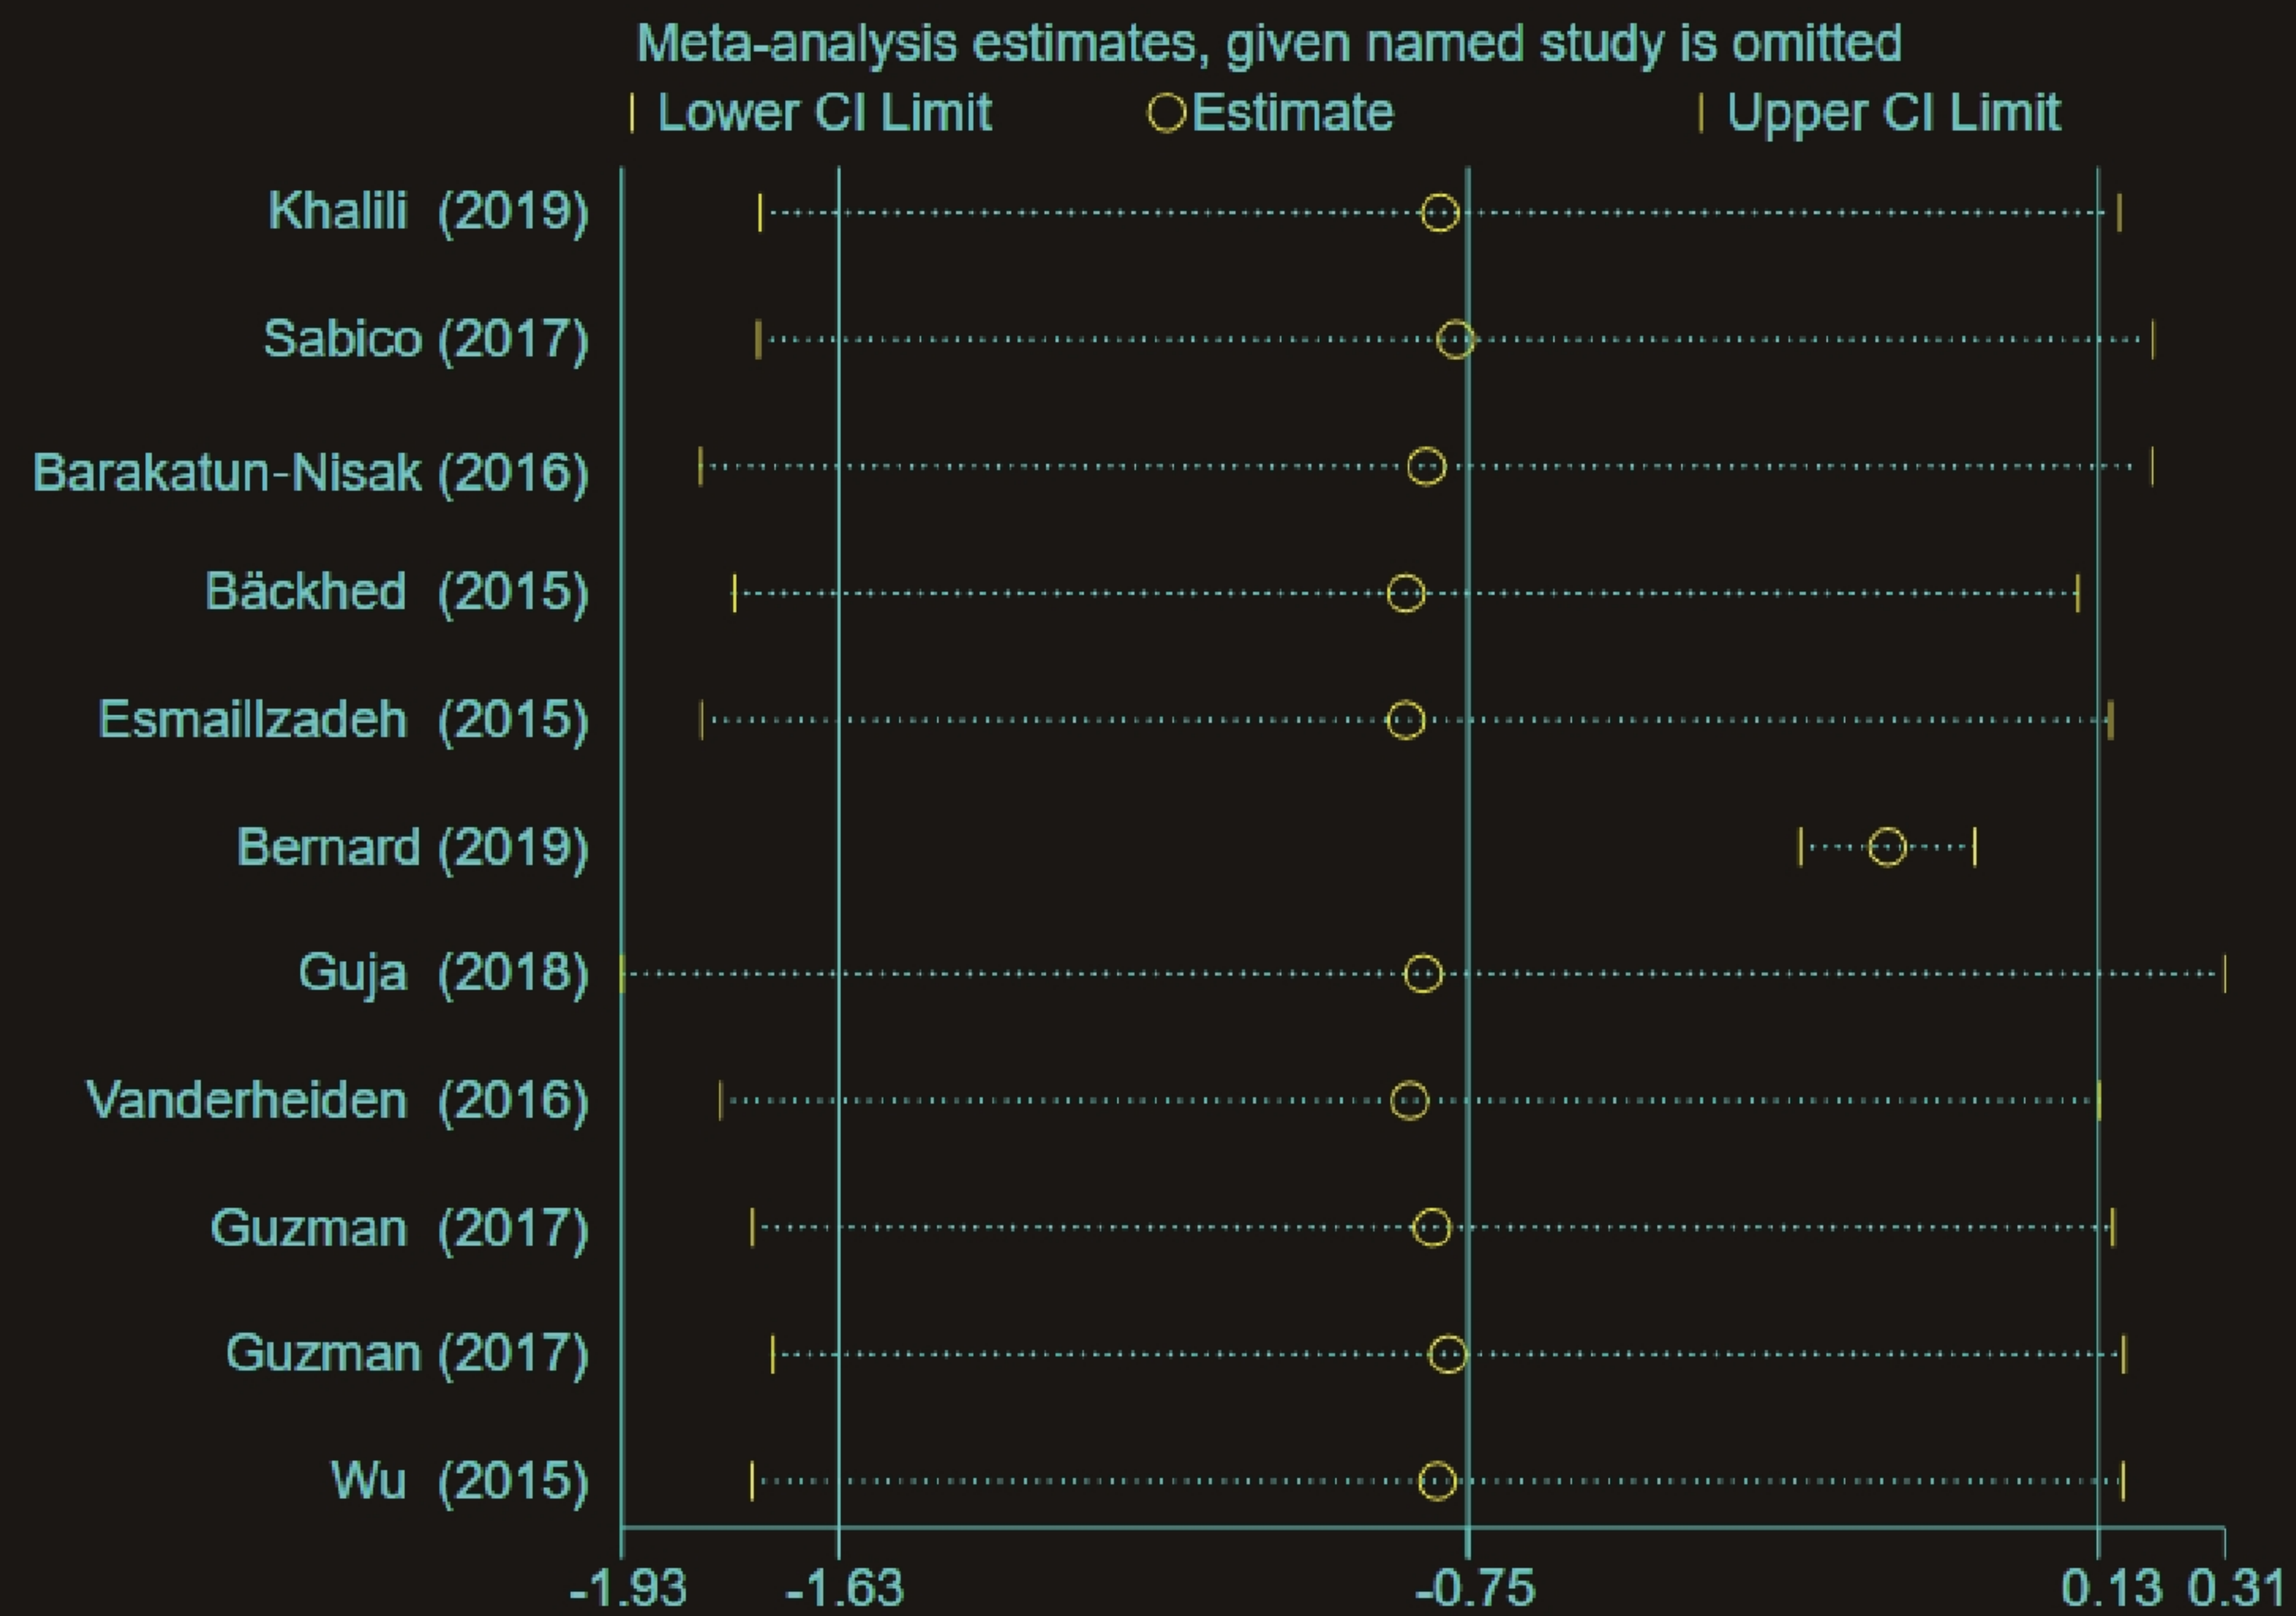

B

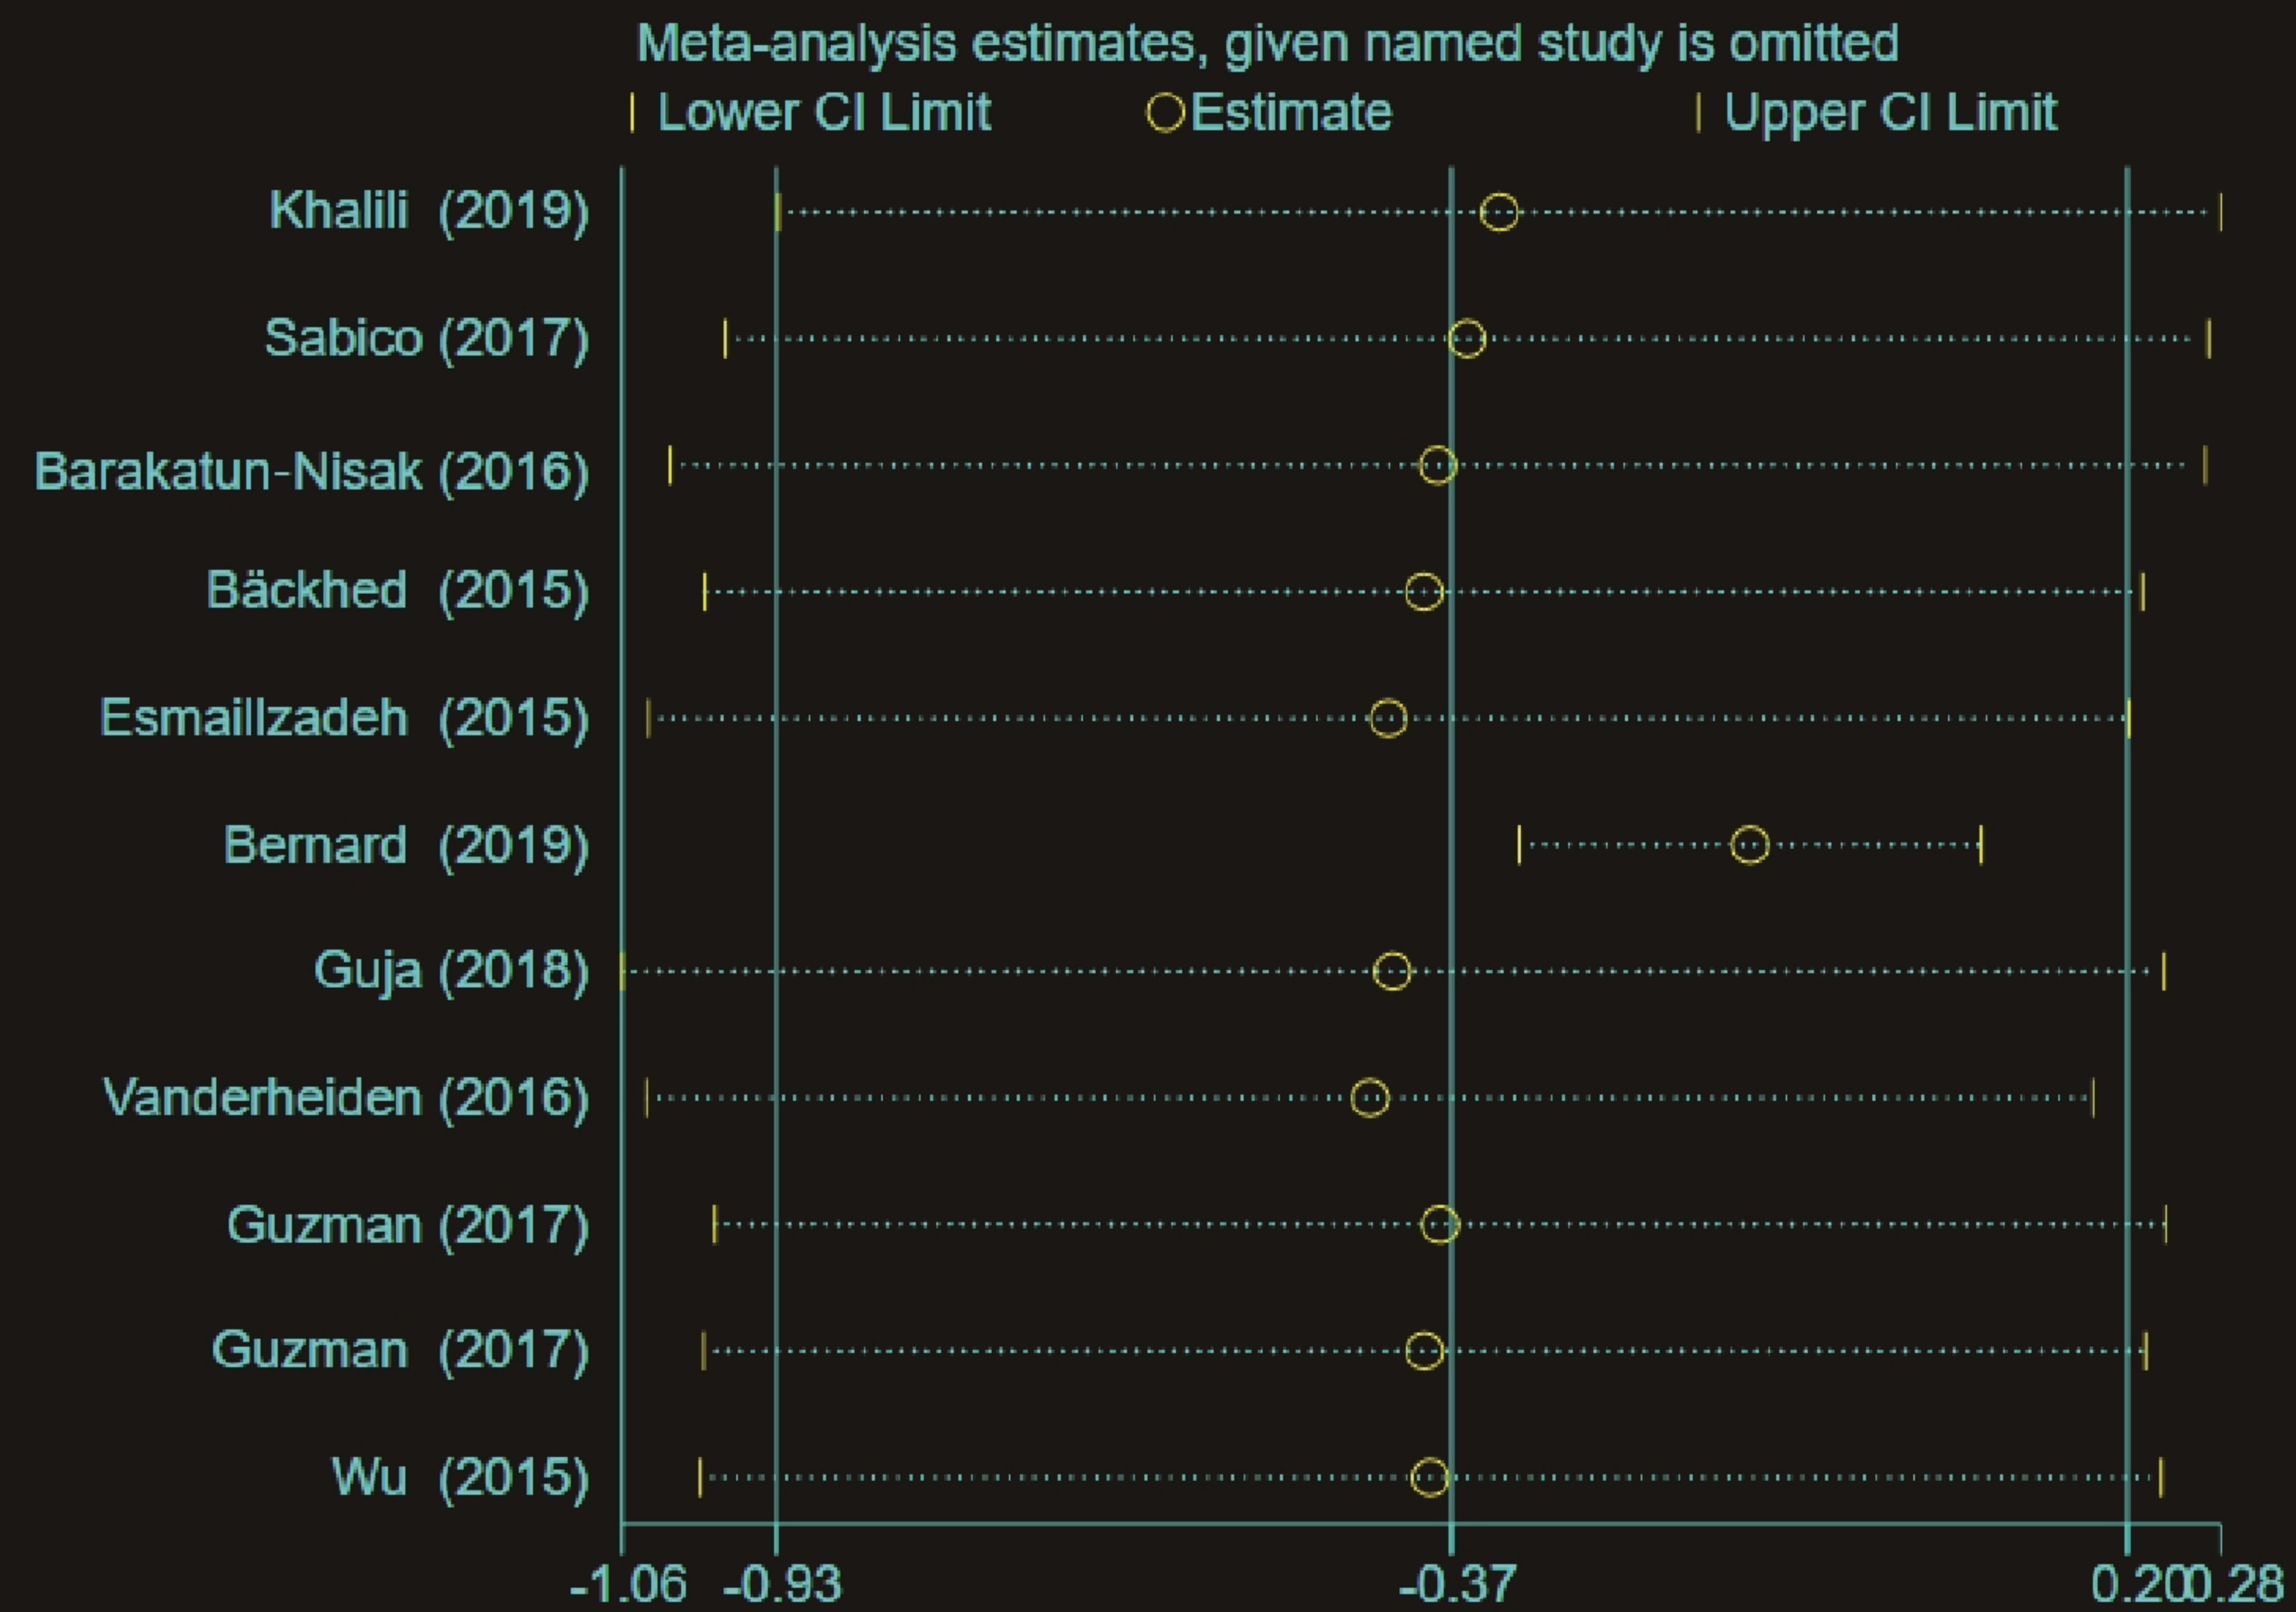

Supplement: Presentation_1.pdf [file Presentation_1.pdf]
